# Supplementary material
Source: publisher figshare collection journal article supplement (https://gsajournals.figshare.com/articles/dataset/_/7425680)
Supplement: Supplementary file 1 [file 1]

Part A, interleaved 1 100

Raphanus LR1-1 (1) ----------------------------------------------------------------------------------------------------

Raphanus LR1-2 (1) ----------------------------------------------------------------------------------------------------

Sinapis LR1-1 (1) TGTGCTTGTGCTGCAGTTTAGAATGCTGATTCCTGGGTGGGTAGTTCCTACTCTTGCTTCCCTTGGTTTTAGCAGGTATTTGTTTATAGCTTCGGTAGTT

Sinapis LR1-2 (1) TGTGCTTGTGCTGCAGTTTAGAATGCTGATTCCTGGGTGGGTAGTTCCTACTCTTGCTTCCCTTGGTTTTAGCAGGTATTTGTTTATAGCTTCGGTAGTT

B. nigra LR1-1 (1) ----------------------------------------------------------------------------------------------------

B. nigra LR1-2 (1) ----------------------------------------------------------------------------------------------------

B. carinata LR1-2 (1) ----------------------------------------------------------------------------------------------------

B. carinata LR1-1 (1) ----------------------------------------------------------------------------------------------------

B_rapa LRh1a (1) ----------------------------------------------------------------------------------------------------

B_juncea LRh1a (1) ----------------------------------------------------------------------------------------------------

B_napus LRh1a (1) ----------------------------------------------------------------------------------------------------

B_oleracea LRh1a (1) ----------------------------------------------------------------------------------------------------

101 200

Raphanus LR1-1 (1) ----------------------------------------------------------------------------------------------------

Raphanus LR1-2 (1) ----------------------------------------------------------------------------------------------------

Sinapis LR1-1 (101) AACCAACTATTCCCTTTTCAGCACACTCTTTGGCGTGCGATAATAGTAAACTTTTAGGAATCCCACACCAAGTGAACAGAGTTATCGGCTGATACTTTCC

Sinapis LR1-2 (101) AACCAACTATTCCCTTTTCAGCACACTCTTTGGCGTGCGATAATAGTAAACTTTTAGGAATCCCACACCAAGTGAACAGAGTTATCGGCTGATACTTTCC

B. nigra LR1-1 (1) ----------------------------------------------------------------------------------------------------

B. nigra LR1-2 (1) ----------------------------------------------------------------------------------------------------

B. carinata LR1-2 (1) ----------------------------------------------------------------------------------------------------

B. carinata LR1-1 (1) ----------------------------------------------------------------------------------------------------

B_rapa LRh1a (1) ----------------------------------------------------------------------------------------------------

B_juncea LRh1a (1) ----------------------------------------------------------------------------------------------------

B_napus LRh1a (1) ----------------------------------------------------------------------------------------------------

B_oleracea LRh1a (1) ----------------------------------------------------------------------------------------------------

201 300

Raphanus LR1-1 (1) ----------------------------------------------------------------------------------------------------

Raphanus LR1-2 (1) ----------------------------------------------------------------------------------------------------

Sinapis LR1-1 (201) TTGTTCCTAGGGTTGAGCAGAAGTTGGTTGACTAGCTACTGAAGTCAGCACACTCCTCTGCTTTTCCGATGCTTTGACCAGCTATTTTCCTAACCAGAGC

Sinapis LR1-2 (201) TTGTTCCTAGGGTTGAGCAGAAGTTGGTTGACTAGCTACTGAAGTCAGCACACTCCTCTGCTTTTCCGATGCTTTGACCAGCTATTTTCCTAACCAGAGC

B. nigra LR1-1 (1) ----------------------------------------------------------------------------------------------------

B. nigra LR1-2 (1) ----------------------------------------------------------------------------------------------------

B. carinata LR1-2 (1) ----------------------------------------------------------------------------------------------------

B. carinata LR1-1 (1) ----------------------------------------------------------------------------------------------------

B_rapa LRh1a (1) ----------------------------------------------------------------------------------------------------

B_juncea LRh1a (1) ----------------------------------------------------------------------------------------------------

B_napus LRh1a (1) ----------------------------------------------------------------------------------------------------

B_oleracea LRh1a (1) ----------------------------------------------------------------------------------------------------

301 400

Raphanus LR1-1 (1) ----------------------------------------------------------------------------------------------------

Raphanus LR1-2 (1) ----------------------------------------------------------------------------------------------------

Sinapis LR1-1 (301) TAATCCTCTGTGCTGTAATGGAGAAGAAGGAGAACCGAAGATATCAAGCTTGGCTGCGCTGCCCGTCGCATCGGACTCCCAACGGCTAAGAGCGGGAACC

Sinapis LR1-2 (301) TAATCCTCTGTGCTGTAATGGAGAAGAAGGAGAACCGAAGATATCAAGCTTGGCTGCGCTGCCCGTCGCATCGGACTCCCAACGGCTAAGAGCGGGAACC

B. nigra LR1-1 (1) ----------------------------------------------------------------------------------------------------

B. nigra LR1-2 (1) ----------------------------------------------------------------------------------------------------

B. carinata LR1-2 (1) ----------------------------------------------------------------------------------------------------

B. carinata LR1-1 (1) ----------------------------------------------------------------------------------------------------

B_rapa LRh1a (1) ----------------------------------------------------------------------------------------------------

B_juncea LRh1a (1) ----------------------------------------------------------------------------------------------------

B_napus LRh1a (1) ----------------------------------------------------------------------------------------------------

B_oleracea LRh1a (1) ----------------------------------------------------------------------------------------------------

401 500

Raphanus LR1-1 (1) ----------------------------------------------------------------------------------------------------

Raphanus LR1-2 (1) ----------------------------------------------------------------------------------------------------

Sinapis LR1-1 (401) ATGATTAGCTTAATGCCTTTCGGCTATAGGACATTAGACTTCTACCGGCTACCGGGAAAAAGATTAGACTAGATCAAAGGACTAGATCGATCAGCAGCCG

Sinapis LR1-2 (401) ATGATTAGCTTAATGCCTTTCGGCTATAGGACATTAGACTTCTACCGGCTACCGGGAAAAAGATTAGACTAGATCAAAGGACTAGATCGATCAGCAGCCG

B. nigra LR1-1 (1) ----------------------------------------------------------------------------------------------------

B. nigra LR1-2 (1) ----------------------------------------------------------------------------------------------------

B. carinata LR1-2 (1) ----------------------------------------------------------------------------------------------------

B. carinata LR1-1 (1) ----------------------------------------------------------------------------------------------------

B_rapa LRh1a (1) ----------------------------------------------------------------------------------------------------

B_juncea LRh1a (1) ----------------------------------------------------------------------------------------------------

B_napus LRh1a (1) ----------------------------------------------------------------------------------------------------

B_oleracea LRh1a (1) ----------------------------------------------------------------------------------------------------

501 600

Raphanus LR1-1 (1) ----------------------------------------------------------------------------------------------------

Raphanus LR1-2 (1) ----------------------------------------------------------------------------------------------------

Sinapis LR1-1 (501) TAGCTGCAGTAGAAAAAGCAGTAGTTGGAGTTGGTACTTCAACCGGTTCTTTTACAGTCCCACCTTCATAAGGAAGAACTGCCTTGAAGGGTAAGGCAGG

Sinapis LR1-2 (501) TAGCTGCAGTAGAAAAAGCAGTAGTTGGAGTTGGTACTTCAACCGGTTCTTTTACAGTCCCACCTTCATAAGGAAGAACTGCCTTGAAGGGTAAGGCAGG

B. nigra LR1-1 (1) ----------------------------------------------------------------------------------------------------

B. nigra LR1-2 (1) ----------------------------------------------------------------------------------------------------

B. carinata LR1-2 (1) ----------------------------------------------------------------------------------------------------

B. carinata LR1-1 (1) ----------------------------------------------------------------------------------------------------

B_rapa LRh1a (1) ----------------------------------------------------------------------------------------------------

B_juncea LRh1a (1) ----------------------------------------------------------------------------------------------------

B_napus LRh1a (1) ----------------------------------------------------------------------------------------------------

B_oleracea LRh1a (1) ----------------------------------------------------------------------------------------------------

601 700

Raphanus LR1-1 (1) ----------------------------------------------------------------------------------------------------

Raphanus LR1-2 (1) ----------------------------------------------------------------------------------------------------

Sinapis LR1-1 (601) TCAAAAGAGTGGGCATCTTTACTACCTATGGCTAACTCAAAAAAATCTGAGAGGGGAGGTTGCTCTGCTCTGGATGCACCGGTCAGAACGGGGAAAGCTG

Sinapis LR1-2 (601) TCAAAAGAGTGGGCATCTTTACTACCTATGGCTAACTCAAAAAAATCTGAGAGGGGAGGTTGCTCTGCTCTGGATGCACCGGTCAGAACGGGGAAAGCTG

B. nigra LR1-1 (1) ----------------------------------------------------------------------------------------------------

B. nigra LR1-2 (1) ----------------------------------------------------------------------------------------------------

B. carinata LR1-2 (1) ----------------------------------------------------------------------------------------------------

B. carinata LR1-1 (1) ----------------------------------------------------------------------------------------------------

B_rapa LRh1a (1) ----------------------------------------------------------------------------------------------------

B_juncea LRh1a (1) ----------------------------------------------------------------------------------------------------

B_napus LRh1a (1) ----------------------------------------------------------------------------------------------------

B_oleracea LRh1a (1) ----------------------------------------------------------------------------------------------------

701 800

Raphanus LR1-1 (1) ----------------------------------------------------------------------------------------------------

Raphanus LR1-2 (1) ----------------------------------------------------------------------------------------------------

Sinapis LR1-1 (701) CTCTTAGAGCTATCTCTTTCCGATCTAGGCAGATGGTTGAATCTAATGCGAGTAGCACTAGGCCTAGAGCGGAATATTAGGTAGTACGAGTTGCTATATT

Sinapis LR1-2 (701) CTCTTAGAGCTATCTCTTTCCGATCTAGGCAGATGGTTGAATCTAATGCGAGTAGCACTAGGCCTAGAGCGGAATATTAGGTAGTACGAGTTGCTATATT

B. nigra LR1-1 (1) ----------------------------------------------------------------------------------------------------

B. nigra LR1-2 (1) ----------------------------------------------------------------------------------------------------

B. carinata LR1-2 (1) ----------------------------------------------------------------------------------------------------

B. carinata LR1-1 (1) ----------------------------------------------------------------------------------------------------

B_rapa LRh1a (1) ----------------------------------------------------------------------------------------------------

B_juncea LRh1a (1) ----------------------------------------------------------------------------------------------------

B_napus LRh1a (1) ----------------------------------------------------------------------------------------------------

B_oleracea LRh1a (1) ----------------------------------------------------------------------------------------------------

801 900

Raphanus LR1-1 (1) ----------------------------------------------------------------------------------------------------

Raphanus LR1-2 (1) ----------------------------------------------------------------------------------------------------

Sinapis LR1-1 (801) TTTCCATCCCCCTTCGGGAAGAAACTCTCTTTGACTTTTGAGAAGATAGACCCAAGTAGCCCTTGAATGATCATCCACTATGGTTCAAAAATATCGAAAA

Sinapis LR1-2 (801) TTTCCATCCCCCTTCGGGAAGAAACTCTCTTTGACTTTTGAGAAGATAGACCCAAGTAGCCCTTGAATGATCATCCACTATGGTTCAAAAATATCGAAAA

B. nigra LR1-1 (1) ----------------------------------------------------------------------------------------------------

B. nigra LR1-2 (1) ----------------------------------------------------------------------------------------------------

B. carinata LR1-2 (1) ----------------------------------------------------------------------------------------------------

B. carinata LR1-1 (1) ----------------------------------------------------------------------------------------------------

B_rapa LRh1a (1) ----------------------------------------------------------------------------------------------------

B_juncea LRh1a (1) ----------------------------------------------------------------------------------------------------

B_napus LRh1a (1) ----------------------------------------------------------------------------------------------------

B_oleracea LRh1a (1) ----------------------------------------------------------------------------------------------------

901 1000

Raphanus LR1-1 (1) ----------------------------------------------------------------------------------------------------

Raphanus LR1-2 (1) ----------------------------------------------------------------------------------------------------

Sinapis LR1-1 (901) CCTTCTGTTCTGTGGTTTCAACTGAAAAAGGGCCCCAAATGTCAATGTGAATCAGATCAAAAGGTTCATCACAAATGTTATTATGAGATTTAAAAGGTAA

Sinapis LR1-2 (901) CCTTCTGTTCTGTGGTTTCAACTGAAAAAGGGCCCCAAATGTCAATGTGAATCAGATCAAAAGGTTCATCACAAATGTTATTATGAGATTTAAAAGGTAA

B. nigra LR1-1 (1) ----------------------------------------------------------------------------------------------------

B. nigra LR1-2 (1) ----------------------------------------------------------------------------------------------------

B. carinata LR1-2 (1) ----------------------------------------------------------------------------------------------------

B. carinata LR1-1 (1) ----------------------------------------------------------------------------------------------------

B_rapa LRh1a (1) ----------------------------------------------------------------------------------------------------

B_juncea LRh1a (1) ----------------------------------------------------------------------------------------------------

B_napus LRh1a (1) ----------------------------------------------------------------------------------------------------

B_oleracea LRh1a (1) ----------------------------------------------------------------------------------------------------

1001 1100

Raphanus LR1-1 (1) -----------------------------------------------------------------------------------------------AAGAA

Raphanus LR1-2 (1) -----------------------------------------------------------------------------------------------AAGAA

Sinapis LR1-1 (1001) GTGTTTTTGTTTAGCCAAAGGACAGATTTTACAAATGGTCTGATTGACCTTTTTATTCTTATGAGTAGGGAGTCAATCTGAAAGGATAGCAGTTTTAGAA

Sinapis LR1-2 (1001) GTGTTTTTGTTTAGCCAAAGGACAGATTTTACAAATGGTCTGATTGACCTTTTTATTCTTATGAGTAGGGAGTCAATCTGAAAGGATAGCAGTTTTAGAA

B. nigra LR1-1 (1) ----------------------------------------------------------------------------------------------------

B. nigra LR1-2 (1) ----------------------------------------------------------------------------------------------------

B. carinata LR1-2 (1) ----------------------------------------------------------------------------------------------------

B. carinata LR1-1 (1) ----------------------------------------------------------------------------------------------------

B_rapa LRh1a (1) ----------------------------------------------------------------------------------------------------

B_juncea LRh1a (1) ----------------------------------------------------------------------------------------------------

B_napus LRh1a (1) ----------------------------------------------------------------------------------------------------

B_oleracea LRh1a (1) ----------------------------------------------------------------------------------------------------

1101 1200

Raphanus LR1-1 (6) GAAGGATGGAGCAGAAAGATAGAAAGATCAGTTGCTGGAAATCAAATATGTAAATAGTCGAGTTATTGCATTCCTCTCACAAACTATCAATTTCATAAGA

Raphanus LR1-2 (6) GAAGGATGGAGCAGAAAGATAGAAAGATCAGTTGCTGGAAATCAAATATGTAAATAGTCGAGTTATTGCATTCCTCTCACAAACTATCAATTTCATAAGA

Sinapis LR1-1 (1101) GAAGGATGGAGCAGAAAGATAGAAAGATCAGTTGCTGGAAATCAAATATGTAAATAGTCGAGTTATTGCATTCCTCTCACAAACTATCAATTTCATAAGA

Sinapis LR1-2 (1101) GAAGGATGGAGCAGAAAGATAGAAAGATCAGTTGCTGGAAATCAAATATGTAAATAGTCGAGTTATTGCATTCCTCTCACAAACTATCAATTTCATAAGA

B. nigra LR1-1 (1) ----------------------------------AGAAGAAGGATGGAGCAGAAAGATAGAAAGATCAGTTGCTGGAAATCAAATATGTAAATAGTCGAG

B. nigra LR1-2 (1) -----------------------------------AGAAGAAGGATGGAGCAGAAAGATAGAAAGATCAGTTGCTGGAAATCAAATATGTAAATAGTCGA

B. carinata LR1-2 (1) -----------------------------------AGAAGAAGGATGGAGCAGAAAGATAGAAAGATCAGTTGCTGGAAATCAAATATGTAAATAGTCGA

B. carinata LR1-1 (1) -----------------------------------AGAAGAAGGATGGAGCAGAAAGATAGAAAGATCAGTTGCTGGAAATCAAATATGTAAATAGTCGA

B_rapa LRh1a (1) ----------------------------------------------------------------------------------------------------

B_juncea LRh1a (1) ----------------------------------------------------------------------------------------------------

B_napus LRh1a (1) ----------------------------------------------------------------------------------------------------

B_oleracea LRh1a (1) ----------------------------------------------------------------------------------------------------

1201 1300

Raphanus LR1-1 (106) GAAGAAAGATCGTTTTTCGAAACTATCAATTTCATAAGAGAAGAAAGATCGTTTTTCGAAACTATCAA----TTTCATAAGAGAAGAAAGATCGTTTTTC

Raphanus LR1-2 (106) GAAGAAAGATCGTTTTTCGAAACTATCAATTTCATAAGAGAAGAAAGATCGTTTTTCGAAACTATCAA----TTTCATAAGAGAAGAAAGATCGTTTTTC

Sinapis LR1-1 (1201) GAAGAAAGATCGTTTTTCGAAACTATCAATTTCATAAGAGAAGAAAGATCGTTTTTCGAAACTATCAA----TTTCATAAGAGAAGAAAGATCGTTTTTC

Sinapis LR1-2 (1201) GAAGAAAGATCGTTTTTCGAAACTATCAATTTCATAAGAGAAGAAAGATCGTTTTTCGAAACTATCAA----TTTCATAAGAGAAGAAAGATCGTTTTTC

B. nigra LR1-1 (67) TTATTGCATTCCTCTTCACAAACTATCAATTTCATAAGAGAAGAAAGATCGTTTTTCGAAACTATCAA----TTTCATAAGAGAAGAAAGATCGTTTTTA

B. nigra LR1-2 (66) GTTATTGCATTCCTCTCACAAACTATCAATTTCATAAGAGAAGAAAGATCGTTTTTAGAAAAGAAAGAAGGTTTTGATTCGAGGAGGCTGATCGTTTTTA

B. carinata LR1-2 (66) GTTATTGCATTCCTCTCACAAACTATCAATTTCATAAGAGAAGAAAGATCGTTTTTCGAAACTATCAA----TTTCATAAGAGAAGAAAGATCGTTTTTA

B. carinata LR1-1 (66) GTTATTGCATTCCTCTCACAAACTATCAATTTCATAAGAGAAGAAAGATCGTTTTTCGAAACTATCAA----TTTCATAAGAGAAGAAAGATCGTTTTTA

B_rapa LRh1a (1) -------------------AAATTATCAATTTCATAAGAGAAGAAAGATCGTTTTTT-AAATTATCAA----TTTCATAAGAGAAGAAAGATCGTTTTTA

B_juncea LRh1a (1) -------------------AAATTATCAATTTCATAAGAGAAGAAAGATCGTTTTTTTAAATTATCAA----TTTCATAAGAGAAGAAAGATCGTTTTTA

B_napus LRh1a (1) -------------------AAATTATCAATTTCATAAGAGAAGAAAGATCGTTTTTTTAAATTATCAA----TTTCATAAGAGAAGAAAGATCGTTTTTA

B_oleracea LRh1a (1) ----------------------------------------------------------AAACTATCAA----TTTCATAAGAGAAGAAAGATCGTTTTTA

1301 1400

Raphanus LR1-1 (202) GAAAAGAAAGAAGGTTTTGATTCGAGGCGGATCCCTTTTTTCTTTGCCTTTACGAGTAAGAAAGTGGTTACGCTCCGCTGGGGAGCCGGAACTGTAAATT

Raphanus LR1-2 (202) GAAAAGAAAGAAGGTTTTGATTCGAGGCGGATCCCTTTTTTCTTTGCCTTTACGAGTAAGAAAGTGGTTACGCTCCGCTGGGGAGCCGGAACTGTAAATT

Sinapis LR1-1 (1297) GAAAAGAAAGAAGGTTTTGATTCGAGGCGGATCCCTTTTTTCTTTGCCTTTACGAGTAAGAAAGTGGTTACGCTCCACTGGGGAGCCGGAACTGTAAATT

Sinapis LR1-2 (1297) GAAAAGAAAGAAGGTTTTGATTCGAGGCGGATCCCTTTTTTCTTTGCCTTTACGAGTAAGAAAGTGGTTACGCTCCACTGGGGAGCCGGAACTGTAAATT

B. nigra LR1-1 (163) GAAAAGAAAGAAGGTTTTGATTCGAGGCGGATCCCTTTTTTCTTTGCCTTTACGAGTAAGAAAGTGGTTACGCTCCGCTGGGGAGCCGGAACTGTAAATT

B. nigra LR1-2 (166) GAAAAGAAAGAAGGTTTTGATTCGAGGCGGATCCCTTTTTTCTTTGCCTTTACGAGTAAGAAAGTGGTTACGCTCCGCTGGGGAGCCGGAACTGTAAATT

B. carinata LR1-2 (162) GAAAAGAAAGAAGGTTTTGATTCGAGGCGGATCCCTTTTTTCTTTGCCTTTACGAGTAAGAAAGTGGTTACGCTCCGCTGGGGAGCCGGAACTGTAAATT

B. carinata LR1-1 (162) GAAAAGAAAGAAGGTTTTGATTCGAGGCGGATCCCTTTTTTCTTTGCCTTTACGAGTAAGAAAGTGGTTACGCTCCGCTGGGGAGCCGGAACTGTAAATT

B_rapa LRh1a (77) GAAAAGAAAGAACGTTTTGATTCGAGGCGGATCCCTTTTTTCTTTGCCTTTACGAGTAAGAAAGTGGTTACGCTCCGCTGGGGAGCCGGAACTGTAAATT

B_juncea LRh1a (78) GAAAAGAAAGAACGTTTTGATTCGAGGCGGATCCCTTTTTTCTTTGCCTTTACGAGTAAGAAAGTGGTTACGCTCCGCTGGGGAGCCGGAACTGTAAATT

B_napus LRh1a (78) GAAAAGAAAGAACGTTTTGATTCGAGGCGGATCCCTTTTTTCTTTGCCTTTACGAGTAAGAAAGTGGTTACGCTCCGCTGGGGAGCCGGAACTGTAAATT

B_oleracea LRh1a (39) GAAAAGAAAGAACGTTTTGATTCGAGGCGGATCCCTTTTTTCTTTGCCTTTACGAGTAAGAAAGTGGTTACGCTCCGCTGGGGAGCCGGAACTGTAAATT

1401 1500

Raphanus LR1-1 (302) CCTACTGTGGTTCGAGTCCACAAACCACTGAGAGCTCTGGCATCGGTTCAGGCTAAATCCTGAAGAAAGCTAGAAAGCGCTGTTTGATGAGCCTGCGTCC

Raphanus LR1-2 (302) CCTACTGTGGTTCGAGTCCACAAACCACTGAGAGCTCTGGCATCGGTTCAGGCTAAATCCTGAAGAAAGCTAGAAAGCGCTGTTTGATGAGCCTGCGTCC

Sinapis LR1-1 (1397) CCTACTGTGGTTCGAGTCCACAAACCACTGAGAGCTCTGGCATCGGTTCAGGCTAAATCCTGAAGAAAGCTAGAAAGCGCTGTTTGATGAGCCTGCGTCC

Sinapis LR1-2 (1397) CCTACTGTGGTTCGAGTCCACAAACCACTGAGAGCTCTGGCATCGGTTCAGGCTAAATCCTGAAGAAAGCTAGAAAGCGCTGTTTGATGAGCCTGCGTCC

B. nigra LR1-1 (263) CCTACTGTGGTTCGAGTCCACAAACCACTGAGAGCTCTGGCATCGGTTCAGGCTAAATCCTGAAGAAAGCTAGAAAGCGCTGTTTGATGAGCCTGCGTCC

B. nigra LR1-2 (266) CCTACTGTGGTTCGAGTCCACAAACCACTGAGAGCTCTGGCATCGGTTCAGGCTAAATCCTGAAGAAAGCTAGAAAGCGCTGTTTGATGAGCCTGCGTCC

B. carinata LR1-2 (262) CCTACTGTGGTTCGAGTCCACAAACCACTGAGAGCTCTGGCATCGGTTCAGGCTAAATCCTGAAGAAAGCTAGAAAGCGCTGTTTGATGAGCCTGCGTCC

B. carinata LR1-1 (262) CCTACTGTGGTTCGAGTCCACAAACCACTGAGAGCTCTGGCATCGGTTCAGGCTAAATCCTGAAGAAAGCTAGAAAGCGCTGTTTGATGAGCCTGCGTCC

B_rapa LRh1a (177) CCTACTGTGGTTCGAGTCCACAAACCACTGAGAGCTCTGGCATCGGTTCAGGCTAAATCCTGAAGAAAGCTAGAAAGCGCTGTTTGATGAGCCTGCGTCC

B_juncea LRh1a (178) CCTACTGTGGTTCGAGTCCACAAACCACTGAGAGCTCTGGCATCGGTTCAGGCTAAATCCTGAAGAAAGCTAGAAAGCGCTGTTTGATGAGCCTGCGTCC

B_napus LRh1a (178) CCTACTGTGGTTCGAGTCCACAAACCACTGAGAGCTCTGGCATCGGTTCAGGCTAAATCCTGAAGAAAGCTAGAAAGCGCTGTTTGATGAGCCTGCGTCC

B_oleracea LRh1a (139) CCTACTGTGGTTCGAGTCCACAAACCACTGAGAGCTCTGGCATCGGTTCAGGCTAAATCCTGAAGAAAGCTAGAAAGCGCTGTTTGATGAGCCTGCGTCC

1501 1600

Raphanus LR1-1 (402) GATTTGTGAGTTGGTTAGGTAAAGGCTGACCAAGCCAATGATGCTTAGCTGCCCAGTCGTGCCGAGGAATTCCCATCCGACCAGAGGAGGGAAGAGAGTG

Raphanus LR1-2 (402) GATTTGTGAGTTGGTTAGGTAAAGGCTGACCAAGCCAATGATGCTTAGCTGCCCAGTCGTGCCGAGGAATTCCCATCCGACCAGAGGAGGGAAGAGAGTG

Sinapis LR1-1 (1497) GATTTGTGAGTTGGTTAGGTAAAGGCTGACCAAGCCAATGATGCTTAGCTGCCCAGTCGTGCCGAGGAATTCCCATCCGACCAGAGGAGGGAAGAGAGTG

Sinapis LR1-2 (1497) GATTTGTGAGTTGGTTAGGTAAAGGCTGACCAAGCCAATGATGCTTAGCTGCCCAGTCGTGCCGAGGAATTCCCATCCGACCAGAGGAGGGAAGAGAGTG

B. nigra LR1-1 (363) GATTTGTGAGTTGGTTAGGTAAAGGCTGACCAAGCCAATGATGCTTAGCTGCCCAGTCGTGCCGAGGAATTCCCATCCGACCAGAGGAGGGAAGAGAGTG

B. nigra LR1-2 (366) GATTTGTGAGTTGGTTAGGTAAAGGCTGACCAAGCCAATGATGCTTAGCTGCCCAGTCGTGCCGAGGAATTCCCATCCGACCAGAGGAGGGAAGAGAGTG

B. carinata LR1-2 (362) GATTTGTGAGTTGGTTAGGTAAAGGCTGACCAAGCCAATGATGCTTAGCTGCCCAGTCGTGCCGAGGAATTCCCATCCGACCAGAGGAGGGAAGAGAGTG

B. carinata LR1-1 (362) GATTTGTGAGTTGGTTAGGTAAAGGCTGACCAAGCCAATGATGCTTAGCTGCCCAGTCGTGCCGAGGAATTCCCATCCGACCAGAGGAGGGAAGAGAGTG

B_rapa LRh1a (277) GATTTGTGAGTTGGTTAGGTAAAGGCTGACCAAGCCAATGATGCTTAGCTGCCCAGTCGTGCCGAGGAATTCCCATCCGACCAGAGGAGGGAAGAGAGTG

B_juncea LRh1a (278) GATTTGTGAGTTGGTTAGGTAAAGGCTGACCAAGCCAATGATGCTTAGCTGCCCAGTCGTGCCGAGGAATTCCCATCCGACCAGAGGAGGGAAGAGAGTG

B_napus LRh1a (278) GATTTGTGAGTTGGTTAGGTAAAGGCTGACCAAGCCAATGATGCTTAGCTGCCCAGTCGTGCCGAGGAATTCCCATCCGACCAGAGGAGGGAAGAGAGTG

B_oleracea LRh1a (239) GATTTGTGAGTTGGTTAGGTAAAGGCTGACCAAGCCAATGATGCTTAGCTGCCCAGTCGTGCCGAGGAATTCCCATCCGACCAGAGGAGGGAAGAGAGTG

1601 1700

Raphanus LR1-1 (502) ACTAAGCAGCAGCTCCACTTGTCGCGTACTTCTTTAGCTGCACCGTCATCGCCGGCCGGACAAACCCTTCCAACAAATGGGGAGTGGGCCAAAGGAACAC

Raphanus LR1-2 (502) ACTAAGCAGCAGCTCCACTTGTCGCGTACTTCTTTAGCTGCACCGTCATCGCCGGCCGGACAAACCCTTCCAACAAATGGGGAGTGGGCCAAAGGAACAC

Sinapis LR1-1 (1597) ACTAAGCAGCAGCTCCACTTGTCGCGTACTTCTTTAGCTGCACCGTCATCGCCGGCCGGACAAACCCTTCCAACAAATGGGGAGTGGGCCAAAGGAACAC

Sinapis LR1-2 (1597) ACTAAGCAGCAGCTCCACTTGTCGCGTACTTCTTTAGCTGCACCGTCATCGCCGGCCGGACAAACCCTTCCAACAAATGGGGAGTGGGCCAAAGGAACAC

B. nigra LR1-1 (463) ACTAAGCAGCAGCTCCACTTGTCGCGTACTTCTTTAGCTGCACCGTCATCGCCGGCCGGACAAACCCTTCCAACAAATGGGGAGTGGGCCAAAGGAACAC

B. nigra LR1-2 (466) ACTAAGCAGCAGCTCCACTTGTCGCGTACTTCTTTAGCTGCACCGTCATCGCCGGCCGGACAAACCCTTCCAACAAATGGGGAGTGGGCCAAAGGAACAC

B. carinata LR1-2 (462) ACTAAGCAGCAGCTCCACTTGTCGCGTACTTCTTTAGCTGCACCGTCATCGCCGGCCGGACAAACCCTTCCAACAAATGGGGAGTGGGCCAAAGGAACAC

B. carinata LR1-1 (462) ACTAAGCAGCAGCTCCACTTGTCGCGTACTTCTTTAGCTGCACCGTCATCGCCGGCCGGACAAACCCTTCCAACAAATGGGGAGTGGGCCAAAGGAACAC

B_rapa LRh1a (377) ACTAAGCAGCAGCTCCACTTGTCGCGTACTTCTTTAGCTGCACCGTCATCGCCGGCCGGACAAACCCTTCCAACAAATGGGGAGTGGGCCAAAGGAACAC

B_juncea LRh1a (378) ACTAAGCAGCAGCTCCACTTGTCGCGTACTTCTTTAGCTGCACCGTCATCGCCGGCCGGACAAACCCTTCCAACAAATGGGGAGTGGGCCAAAGGAACAC

B_napus LRh1a (378) ACTAAGCAGCAGCTCCACTTGTCGCGTACTTCTTTAGCTGCACCGTCATCGCCGGCCGGACAAACCCTTCCAACAAATGGGGAGTGGGCCAAAGGAACAC

B_oleracea LRh1a (339) ACTAAGCAGCAGCTCCACTTGTCGCGTACTTCTTTAGCTGCACCGTCATCGCCGGCCGGACAAACCCTTCCAACAAATGGGGAGTGGGCCAAAGGAACAC

1701 1800

Raphanus LR1-1 (602) GACACATCCAGTGAAGAGATCCCGGACAGGGAAGTCAGAAGGTCTGCAAGCCTCGTCTTCGCCCCTGCTTTAGCTGCACTTGGTGCGTAAGAGGGAGACC

Raphanus LR1-2 (602) GACACATCCAGTGAAGAGATCCCGGACAGGGAAGTCAGAAGGTCTGCAAGCCTCGTCTTCGCCCCTGCTTTAGCTGCACTTGGTGCGTAAGAGGGAGACC

Sinapis LR1-1 (1697) GACACATCCAGTGAAGAGATCCCGGACAGGGAAGTCAGAAGGTCTGCAAGCCTCGTCTTCGCCCCTGCTTTAGCTGCACTTGGTGCGTAAGAGGGAGACC

Sinapis LR1-2 (1697) GACACATCCAGTGAAGAGATCCCGGACAGGGAAGTCAGAAGGTCTGCAAGCCTCGTCTTCGCCCCTGCTTTAGCTGCACTTGGTGCGTAAGAGGGAGACC

B. nigra LR1-1 (563) GACACATCCAGTGAAGAGATCCCGGACAGGGAAGTCAGAAGGTCTGCAAGCCTCGTCTTCGCCCCTGCTTTAGCTGCACTTGGTGCGTAAGAGGGAGACC

B. nigra LR1-2 (566) GACACATCCAGTGAAGAGATCCCGGACAGGGAAGTCAGAAGGTCTGCAAGCCTCGTCTTCGCCCCTGCTTTAGCTGCACTTGGTGCGTAAGAGGGAGACC

B. carinata LR1-2 (562) GACACATCCAGTGAAGAGATCCCGGACAGGGAAGTCAGAAGGTCTGCAAGCCTCGTCTTCGCCCCTGCTTTAGCTGCACTTGGTGCGTAAGAGGGAGACC

B. carinata LR1-1 (562) GACACATCCAGTGAAGAGATCCCGGACAGGGAAGTCAGAAGGTCTGCAAGCCTCGTCTTCGCCCCTGCTTTAGCTGCACTTGGTGCGTAAGAGGGAGACC

B_rapa LRh1a (477) GACACATCCAGTGAAGAGATCCCGGACAGGGAAGTCAGAAGGTCTGCAAGCCTCGTCTTCGCCCCTGCTTTAGCTGCACTTGGTGCGTAAGAGGGAGACC

B_juncea LRh1a (478) GACACATCCAGTGAAGAGATCCCGGACAGGGAAGTCAGAAGGTCTGCAAGCCTCGTCTTCGCCCCTGCTTTAGCTGCACTTGGTGCGTAAGAGGGAGACC

B_napus LRh1a (478) GACACATCCAGTGAAGAGATCCCGGACAGGGAAGTCAGAAGGTCTGCAAGCCTCGTCTTCGCCCCTGCTTTAGCTGCACTTGGTGCGTAAGAGGGAGACC

B_oleracea LRh1a (439) GACACATCCAGTGAAGAGATCCCGGACAGGGAAGTCAGAAGGTCTGCAAGCCTCGTCTTCGCCCCTGCTTTAGCTGCACTTGGTGCGTAAGAGGGAGACC

1801 1900

Raphanus LR1-1 (702) CGGTCGCTCAGATACAGACAGCAGCTCATTTTACGCTTAAACACATCCCAGGGAATTACAGGAATACGGGCTCCGCCTAGCTACCTGATCCCATCATGAA

Raphanus LR1-2 (702) CGGTCGCTCAGATACAGACAGCAGCTCATTTTACGCTTAAACACATCCCAGGGAATTACAGGAATACGGGCTCCGCCTAGCTACCTGATCCCATCATGAA

Sinapis LR1-1 (1797) CGGTCGCTCAGATACAGACAGCAGCTCATTTTACGCTTAAACACATCCCAGGGAATTACAGGAATACGGGCTCCGCCTAGCTACCTGATCCCATCATGAA

Sinapis LR1-2 (1797) CGGTCGCTCAGATACAGACAGCAGCTCATTTTACGCTTAAACACATCCCAGGGAATTACAGGAATACGGGCTCCGCCTAGCTACCTGATCCCATCATGAA

B. nigra LR1-1 (663) CGGTCGCTCAGATACAGACAGCAGCTCATTTTACGCTTAAACACATCCCAGGGAATTACAGGAATACGGGCTCCGCCTAGCTACCTGATCCCATCATGAA

B. nigra LR1-2 (666) CGGTCGCTCAGATACAGACAGCAGCTCATTTTACGCTTAAACACATCCCAGGGAATTACAGGAATACGGGCTCCGCCTAGCTACCTGATCCCATCATGAA

B. carinata LR1-2 (662) CGGTCGCTCAGATACAGACAGCAGCTCATTTTACGCTTAAACACATCCCAGGGAATTACAGGAATACGGGCTCCGCCTAGCTACCTGATCCCATCATGAA

B. carinata LR1-1 (662) CGGTCGCTCAGATACAGACAGCAGCTCATTTTACGCTTAAACACATCCCAGGGAATTACAGGAATACGGGCTCCGCCTAGCTACCTGATCCCATCATGAA

B_rapa LRh1a (577) CGGTCGCTCAGATACAGACAGCAGCTCATTTTACGCTTAAACACATCCCAGGGAATTAAAGGAATACGGGCTCCGCCTAGCTACCTGATCCCATCATGAA

B_juncea LRh1a (578) CGGTCGCTCAGATACAGACAGCAGCTCATTTTACGCTTAAACACATCCCAGGGAATTAAAGGAATACGGGCTCCGCCTAGCTACCTGATCCCATCATGAA

B_napus LRh1a (578) CGGTCGCTCAGATACAGACAGCAGCTCATTTTACGCTTAAACACATCCCAGGGAATTAAAGGAATACGGGCTCCGCCTAGCTACCTGATCCCATCATGAA

B_oleracea LRh1a (539) CGGTCGCTCAGATACAGACAGCAGCTCATTTTACGCTTAAACACATCCCAGGGAATTAAAGGAATACGGGCTCCGCCTAGCTACCTGATCCCATCATGAA

1901 2000

Raphanus LR1-1 (802) TAGGAATTACCAGCGAACCAAGAGAGATAGATTCAACAGAGGAGAAGGGGTGGCGTGCTTTAGCGACACCTTCAAGACATCCAGGAGTGATCTAGACGAG

Raphanus LR1-2 (802) TAGGAATTACCAGCGAACCAAGAGAGATAGATTCAACAGAGGAGAAGGGGTGGCGTGCTTTAGCGACACCTTCAAGACATCCAGGAGTGATCTAGACGAG

Sinapis LR1-1 (1897) TAGGAATTACCAGCGAACCAAGAGAGATAGATTCAACAGAGGAGAAGGGGTGGCGTGCTTTAGCGACACCTTCAAGACATCCAGGAGTGATCTAGACGAG

Sinapis LR1-2 (1897) TAGGAATTACCAGCGAACCAAGAGAGATAGATTCAACAGAGGAGAAGGGGTGGCGTGCTTTAGCGACACCTTCAAGACATCCAGGAGTGATCTAGACGAG

B. nigra LR1-1 (763) TAGGAATTACCAGCGAACCAAGAGAGATAGATTCAACAGAGGAGAAGGGGTGGCGTGCTTTAGCGACACCTTCAAGACATCCAGGAGTGATCTAGACGAG

B. nigra LR1-2 (766) TAGGAATTACCAGCGAACCAAGAGAGATAGATTCAACAGAGGAGAAGGGGTGGCGTGCTTTAGCGACACCTTCAAGACATCCAGGAGTGATCTAGACGAG

B. carinata LR1-2 (762) TAGGAATTACCAGCGAACCAAGAGAGATAGATTCAACAGAGGAGAAGGGGTGGCGTGCTTTAGCGACACCTTCAAGACATCCAGGAGTGATCTAGACGAG

B. carinata LR1-1 (762) TAGGAATTACCAGCGAACCAAGAGAGATAGATTCAACAGAGGAGAAGGGGTGGCGTGCTTTAGCGACACCTTCAAGACATCCAGGAGTGATCTAGACGAG

B_rapa LRh1a (677) TAGGAATTACCAGCGAACCAAGAGAGATAGATTCAACAGAGGAGAAGGGGTGGCGTGCTTTAGCGACACCTTCAAGACATCCAGGAGTGATCTAGACGAG

B_juncea LRh1a (678) TAGGAATTACCAGCGAACCAAGAGAGATAGATTCAACAGAGGAGAAGGGGTGGCGTGCTTTAGCGACACCTTCAAGACATCCAGGAGTGATCTAGACGAG

B_napus LRh1a (678) TAGGAATTACCAGCGAACCAAGAGAGATAGATTCAACAGAGGAGAAGGGGTGGCGTGCTTTAGCGACACCTTCAAGACATCCAGGAGTGATCTAGACGAG

B_oleracea LRh1a (639) TAGGAATTACCAGCGAACCAAGAGAGATAGATTCAACAGAGGAGAAGGGGTGGCGTGCTTTAGCGACACCTTCAAGACATCCAGGAGTGATCTAGACGAG

2001 2100

Raphanus LR1-1 (902) GTGGGACATGCCGGCTAGAGTACATGCTTCAACTGGAACATCGCTTCGCTACTCTTCCCTCCCTACCCCTACGGTCGTACACTCTGTTGATAGTTCGCCA

Raphanus LR1-2 (902) GTGGGACATGCCGGCTAGAGTACATGCTTCAACTGGAACATCGCTTCGCTACTCTTCCCTCCCTACCCCTACGGTCGTACACTCTGTTGATAGTTCGCCA

Sinapis LR1-1 (1997) GTGGGACATGCCGGCTAGAGTACATGCTTCAACTGGAACATCGCTTCGCTACTCTTCCCTCCCTACCCCTACGGTCGTACACTCTGTTGATAGTTCGCCA

Sinapis LR1-2 (1997) GTGGGACATGCCGGCTAGAGTACATGCTTCAACTGGAACATCGCTTCGCTACTCTTCCCTCCCTACCCCTACGGTCGTACACTCTGTTGATAGTTCGCCA

B. nigra LR1-1 (863) GTGGGACATGCCGGCTAGAGTACATGCTTCAACTGGAACATCGCTTCGCTACTCTTCCCTCCCTACCCCTACGGTCGTACACTCTGTTGATAGTTCGCCA

B. nigra LR1-2 (866) GTGGGACATGCCGGCTAGAGTACATGCTTCAACTGGAACATCGCTTCGCTACTCTTCCCTCCCTACCCCTACGGTCGTACACTCTGTTGATAGTTCGCCA

B. carinata LR1-2 (862) GTGGGACATGCCGGCTAGAGTACATGCTTCAACTGGAACATCGCTTCGCTACTCTTCCCTCCCTACCCCTACGGTCGTACACTCTGTTGATAGTTCGCCA

B. carinata LR1-1 (862) GTGGGACATGCCGGCTAGAGTACATGCTTCAACTGGAACATCGCTTCGCTACTCTTCCCTCCCTACCCCTACGGTCGTACACTCTGTTGATAGTTCGCCA

B_rapa LRh1a (777) GTGGGACATGCCGGCTAGAGTACATGCTTCAACTGGAACATCGCTTCGCTACTCTTCCCTCCCTACCCCTACGGTCGTACACTCTGTTGATAGTTCGCCA

B_juncea LRh1a (778) GTGGGACATGCCGGCTAGAGTACATGCTTCAACTGGAACATCGCTTCGCTACTCTTCCCTCCCTACCCCTACGGTCGTACACTCTGTTGATAGTTCGCCA

B_napus LRh1a (778) GTGGGACATGCCGGCTAGAGTACATGCTTCAACTGGAACATCGCTTCGCTACTCTTCCCTCCCTACCCCTACGGTCGTACACTCTGTTGATAGTTCGCCA

B_oleracea LRh1a (739) GTGGGACATGCCGGCTAGAGTACATGCTTCAACTGGAACATCGCTTCGCTACTCTTCCCTCCCTACCCCTACGGTCGTACACTCTGTTGATAGTTCGCCA

2101 2200

Raphanus LR1-1 (1002) ATGGCTCACAACCAGACAATCATAGTATGTTCGTTCGTTCACTTCGTTCTCTCTCTCCCCTTCTCCCGTTAGCTTGTTCCCCTCCTCCCTTCCCAACCTT

Raphanus LR1-2 (1002) ATGGCTCACAACCAGACAATCATAGTATGTTCGTTCGTTCACTTCGTTCTCTCTCTCCCCTTCTCCCGTTAGCTTGTTCCCCTCCTCCCTTCCCAACCTT

Sinapis LR1-1 (2097) ATGGCTCACAACCAGACAATCATAGTATGTTCGTTCGTTCACTTCGTTCTCTCTCTCCCCTTCTCCCGTTAGCTTGTTCCCCTCCTCCCTTCCCAACCTT

Sinapis LR1-2 (2097) ATGGCTCACAACCAGACAATCATAGTATGTTCGTTCGTTCACTTCGTTCTCTCTCTCCCCTTCTCCCGTTAGCTTGTTCCCCTCCTCCCTTCCCAACCTT

B. nigra LR1-1 (963) ATGGCTCACAACCAGACAATCATAGTATGTTCGTTCGTTCACTTCGTTCTCTCTCTCCCCTTCTCCCGTTAGCTTGTTCCCCTCCTCCCTTCCCAACCTT

B. nigra LR1-2 (966) ATGGCTCACAACCAGACAATCATAGTATGTTCGTTCGTTCACTTCGTTCTCTCTCTCCCCTTCTCCCGTTAGCTTGTTCCCCTCCTCCCTTCCCAACCTT

B. carinata LR1-2 (962) ATGGCTCACAACCAGACAATCATAGTATGTTCGTTCGTTCACTTCGTTCTCTCTCTCCCCTTCTCCCGTTAGCTTGTTCCCCTCCTCCCTTCCCAACCTT

B. carinata LR1-1 (962) ATGGCTCACAACCAGACAATCATAGTATGTTCGTTCGTTCACTTCGTTCTCTCTCTCCCCTTCTCCCGTTAGCTTGTTCCCCTCCTCCCTTCCCAACCTT

B_rapa LRh1a (877) ATGGCTCACAACCAGACAATCATAGTATGTTCGTTCGTTCACTTCGTTCTCTCTCTCCCCTTCTCCCGTTAGCTTGTTCCCCTCTTCCTTTCTCAACCTT

B_juncea LRh1a (878) ATGGCTCACAACCAGACAATCATAGTATGTTCGTTCGTTCACTTCGTTCTCTCTCTCCCCTTCTCCCGTTAGCTTGTTCCCCTCTTCCTTTCTCAACCTT

B_napus LRh1a (878) ATGGCTCACAACCAGACAATCATAGTATGTTCGTTCGTTCACTTCGTTCTCTCTCTCCCCTTCTCCCGTTAGCTTGTTCCCCTCTTCCTTTCTCAACCTT

B_oleracea LRh1a (839) ATGGCTCACAACCAGACAATCATAGTATGTTCGTTCGTTCACTTCGTTCTCTCTCTCCCCTTCTCCCGTTAGCTTGTTCCCCTCTTCCTTTCTCAACCTT

2201 2300

Raphanus LR1-1 (1102) CCCAGCCCTTCCTCCAAGAGTAGTTACGCCTTTTCCGTCAGTGGAGAGAGCGAGCAACGACCTGTGAGCGACCGTAGCTCCCTCTGCAAGTGGTAAGGCG

Raphanus LR1-2 (1102) CCCAGCCCTTCCTCCAAGAGTAGTTACGCCTTTTCCGTCAGTGGAGAGAGCGAGCAACGACCTGTGAGCGACCGTAGCTCCCTCTGCAAGTGGTAAGGCG

Sinapis LR1-1 (2197) CCCAGCCCTTCCTCCAAGAGTAGTTACGCCTTTTCCGTCAGTGGAGAGAGCGAGCAACGACCTGTGAGCGACCGTAGCTCCCTCTGCAAGTGGTAAGGCG

Sinapis LR1-2 (2197) CCCAGCCCTTCCTCCAAGAGTAGTTACGCCTTTTCCGTCAGTGGAGAGAGCGAGCAACGACCTGTGAGCGACCGTAGCTCCCTCTGCAAGTGGTAAGGCG

B. nigra LR1-1 (1063) CCCAGCCCTTCCTCCAAGAGTAGTTACGCCTTTTCCGTCAGTGGAGAGAGCGAGCAACGACCTGTGAGCGACCGTAGCTCCCTCTGCAAGTGGTAAGGCG

B. nigra LR1-2 (1066) CCCAGCCCTTCCTCCAAGAGTAGTTACGCCTTTTCCGTCAGTGGAGAGAGCGAGCAACGACCTGTGAGCGACCGTAGCTCCCTCTGCAAGTGGTAAGGCG

B. carinata LR1-2 (1062) CCCAGCCCTTCCTCCAAGAGTAGTTACGCCTTTTCCGTCAGTGGAGAGAGCGAGCAACGACCTGTGAGCGACCGTAGCTCCCTCTGCAAGTGGTAAGGCG

B. carinata LR1-1 (1062) CCCAGCCCTTCCTCCAAGAGTAGTTACGCCTTTTCCGTCAGTGGAGAGAGCGAGCAACGACCTGTGAGCGACCGTAGCTCCCTCTGCAAGTGGTAAGGCG

B_rapa LRh1a (977) CTTAGCCCTTCCTCCAAGAGTAGTTACGCCTTTTCCGTCAGTGGAGAGAGCGAGCAACGACCTGTGAGCGACCGTAGCTCCCTCTGCAAGTGGTAAGGCG

B_juncea LRh1a (978) CTTAGCCCTTCCTCCAAGAGTAGTTACGCCTTTTCCGTCAGTGGAGAGAGCGAGCAACGACCTGTGAGCGACCGTAGCTCCCTCTGCAAGTGGTAAGGCG

B_napus LRh1a (978) CTTAGCCCTTCCTCCAAGAGTAGTTACGCCTTTTCCGTCAGTGGAGAGAGCGAGCAACGACCTGTGAGCGACCGTAGCTCCCTCTGCAAGTGGTAAGGCG

B_oleracea LRh1a (939) CTTAGCCCTTCCTCCAAGAGTAGTTACGCCTTTTCCGTCAGTGGAGAGAGCGAGCAACGACCTGTGAGCGACCGTAGCTCCCTCTGCAAGTGGTAAGGCG

2301 2400

Raphanus LR1-1 (1202) CAGTTCACCCCCTATCGAACGGAGGAAGATCGCTGTTGATGTCATGACTAACTTCTTGATTCTTTGATGAGAGAGGCGTGCGTGTGAAATGTCTGATTCA

Raphanus LR1-2 (1202) CAGTTCACCCCCTATCGAACGGAGGAAGATCGCTGTTGATGTCATGACTAACTTCTTGATTCTTTGATGAGAGAGGCGTGCGTGTGAAATGTCTGATTCA

Sinapis LR1-1 (2297) CAGTTCACCCCCTATCGAACGGAGGAAGATCGCTGTTGATGTCATGACTAACTTCTTGATTCTTTGATGAGAGAGGCGTGCGTGTGAAATGTCTGATTCA

Sinapis LR1-2 (2297) CAGTTCACCCCCTATCGAACGGAGGAAGATCGCTGTTGATGTCATGACTAACTTCTTGATTCTTTGATGAGAGAGGCGTGCGTGTGAAATGTCTGATTCA

B. nigra LR1-1 (1163) CAGTTCACCCCCTATCGAACGGAGGAAGATCGCTGTTGATGTCATGACTAACTTCTTGATTCTTTGATGAGAGAGGCGTGCGTGTGAAATGTCTGATTCA

B. nigra LR1-2 (1166) CAGTTCACCCCCTATCGAACGGAGGAAGATCGCTGTTGATGTCATGACTAACTTCTTGATTCTTTGATGAGAGAGGCGTGCGTGTGAAATGTCTGATTCA

B. carinata LR1-2 (1162) CAGTTCACCCCCTATCGAACGGAGGAAGATCGCTGTTGATGTCATGACTAACTTCTTGATTCTTTGATGAGAGAGGCGTGCGTGTGAAATGTCTGATTCA

B. carinata LR1-1 (1162) CAGTTCACCCCCTATCGAACGGAGGAAGATCGCTGTTGATGTCATGACTAACTTCTTGATTCTTTGATGAGAGAGGCGTGCGTGTGAAATGTCTGATTCA

B_rapa LRh1a (1077) CAGTTCACCCCCTATCGAACGGAGGAAGATCGCTGTTGATGTCATGACTAACTTCTTGATTCTTTGATGAGAGAGGCGTGCGTGTGAAATGTCTGATTCA

B_juncea LRh1a (1078) CAGTTCACCCCCTATCGAACGGAGGAAGATCGCTGTTGATGTCATGACTAACTTCTTGATTCTTTGATGAGAGAGGCGTGCGTGTGAAATGTCTGATTCA

B_napus LRh1a (1078) CAGTTCACCCCCTATCGAACGGAGGAAGATCGCTGTTGATGTCATGACTAACTTCTTGATTCTTTGATGAGAGAGGCGTGCGTGTGAAATGTCTGATTCA

B_oleracea LRh1a (1039) CAGTTCACCCCCTATCGAACGGAGGAAGATCGCTGTTGATGTCATGACTAACTTCTTGATTCTTTGATGAGAGAGGCGTGCGTGTGAAATGTCTGATTCA

2401 2500

Raphanus LR1-1 (1302) TGGCTTGGTTAACGAGATGTCCCAACTGGTACTGGAGCACACCCGTCTGGTTCGTACCATCATTGGCTTGTTCATCCTTTACCTAAGCCTAATCTTCTTC

Raphanus LR1-2 (1302) TGGCTTGGTTAACGAGATGTCCCAACTGGTACTGGAGCACACCCGTCTGGTTCGTACCATCATTGGCTTGTTCATCCTTTACCTAAGCCTAATCTTCTTC

Sinapis LR1-1 (2397) TGGCTTGGTTAACGAGATGTCCCAACTGGTACTGGAGCACACCCGTCTGGTTCGTACCATCATTGGCTTGTTCATCCTTTACCTAAGCCTAATCTTCTTC

Sinapis LR1-2 (2397) TGGCTTGGTTAACGAGATGTCCCAACTGGTACTGGAGCACACCCGTCTGGTTCGTACCATCATTGGCTTGTTCATCCTTTACCTAAGCCTAATCTTCTTC

B. nigra LR1-1 (1263) TGGCTTGGTTAACGAGATGTCCCAACTGGTACTGGAGCACACCCGTCTGGTTCGTACCATCATTGGCTTGTTCATCCTTTACCTAAGCCTAATCTTCTTC

B. nigra LR1-2 (1266) TGGCTTGGTTAACGAGATGTCCCAACTGGTACTGGAGCACACCCGTCTGGTTCGTACCATCATTGGCTTGTTCATCCTTTACCTAAGCCTAATCTTCTTC

B. carinata LR1-2 (1262) TGGCTTGGTTAACGAGATGTCCCAACTGGTACTGGAGCACACCCGTCTGGTTCGTACCATCATTGGCTTGTTCATCCTTTACCTAAGCCTAATCTTCTTC

B. carinata LR1-1 (1262) TGGCTTGGTTAACGAGATGTCCCAACTGGTACTGGAGCACACCCGTCTGGTTCGTACCATCATTGGCTTGTTCATCCTTTACCTAAGCCTAATCTTCTTC

B_rapa LRh1a (1177) TGGCTTGGTTAACGAGATGTCCCAACTGGTACTGGAGCACACCCGTCTGGTTCGTACTATCATTGGCTTGTTCATCCTTTACCTAAGCCTAATCTTCTTC

B_juncea LRh1a (1178) TGGCTTGGTTAACGAGATGTCCCAACTGGTACTGGAGCACACCCGTCTGGTTCGTACTATCATTGGCTTGTTCATCCTTTACCTAAGCCTAATCTTCTTC

B_napus LRh1a (1178) TGGCTTGGTTAACGAGATGTCCCAACTGGTACTGGAGCACACCCGTCTGGTTCGTACTATCATTGGCTTGTTCATCCTTTACCTAAGCCTAATCTTCTTC

B_oleracea LRh1a (1139) TGGCTTGGTTAACGAGATGTCCCAACTGGTACTGGAGCACACCCGTCTGGTTCGTACTATCATTGGCTTGTTCATCCTTTACCTAAGCCTAATCTTCTTC

2501 2600

Raphanus LR1-1 (1402) TTCATAGCACACTCTGCTACA-----GCACA------------CTA--CGCTTCTGTG----CTGCTCA------GTAGTGACTGCTAGGGAGT-TAATC

Raphanus LR1-2 (1402) TTCATAGCACACTCTGCTACA-----GCACA------------CTA--CGCTTCTGTG----CTGCTCA------GTAGTGACTGCTAGGGAGT-TAATC

Sinapis LR1-1 (2497) TTCATAGCACACGGAAGTAAAAAAAAGCAGAGAAGGATTAAGACTAACCACTTTTTCGACATCCCTTCATGAAGCGCAGCAACATTTCGGAAGACTGCTA

Sinapis LR1-2 (2497) TTCATAGCACACGGAAGTAAAAAAAAGCAGAGAAGGATTAAGACTAACCACTTTTTCGACATCCCTTCATGAAGCGCAGCAACATTTCGGAAGACTGCTA

B. nigra LR1-1 (1363) TTCATAGCACACGGAAGTAAAAAAAAGCAGAGAAGGATTAAGACTAACCACTTTTTCGACATCCCTTCATGAAGCGCAGCAACATTTCGGAAGACTGCTA

B. nigra LR1-2 (1366) TTCATAGCACACGGAAGTAAAAAAAAGCAGAGAAGGATTAAGACTAACCACTTTTTCGACATCCCTTCATGAAGCGCAGCAACATTTCGGAAGACTGCTA

B. carinata LR1-2 (1362) TTCATAGCACACGGAAGTAAAAAAAAGCAGAGAAGGATTAAGACTAACCACTTTTTCGACATCCCTTCATGAAGCGCAGCAACATTTCGGAAGACTGCTA

B. carinata LR1-1 (1362) TTCATAGCACACGGAAGTAAAAAAAAGCAGAGAAGGATTAAGACTAACCACTTTTTCGACATCCCTTCATGAAGCGCAGCAACATTTCGGAAGACTGCTA

B_rapa LRh1a (1277) TTCATAGCACACTCTGCTACA-----GCACA------------CTA--CGCTTCTGTG----CTGCTCA------GTAGTGACTGCTAGGGAGT-TAATC

B_juncea LRh1a (1278) TTCATAGCACACTCTGCTACA-----GCACA------------CTA--CGCTTCTGTG----CTGCTCA------GTAGTGACTGCTAGGGAGT-TAATC

B_napus LRh1a (1278) TTCATAGCACACTCTGCTACA-----GCACA------------CTA--CGCTTCTGTG----CTGCTCA------GTAGTGACTGCTAGGGAGT-TAATC

B_oleracea LRh1a (1239) TTCATAGCACACTCTGCTACA-----GCACA------------CTA--CGCTTCTGTG----CTGCTCA------GTAGTGACTGCTAGGGAGT-TAATC

2601 2700

Raphanus LR1-1 (1472) ACACCAGGCGGGCTTG--CTTCGCTAGAAAAG------AATTCCACTAGTGTGTGCTGCTGAGAGTGAACTATGTTACTCGGAACAA-----TATCTGAA

Raphanus LR1-2 (1472) ACACCAGGCGGGCTTG--CTTCGCTAGAAAAG------AATTCCACTAGTGTGTGCTGCTGAGAGTGAACTATGTTACTCGGAACAA-----TATCTGAA

Sinapis LR1-1 (2597) AAAGCGAGAAGTCCTGACCTTCGTTACTAGAGCACAGAAAAAGCAACAGTGTGCTGTACAGAGAACTTGCTTCGATAGGAAAAGAAAAGCTGTATTTCTA

Sinapis LR1-2 (2597) AAAGCGAGAAGTCCTGACCTTCGTTACTAGAGCACAGAAAAAGCAACAGTGTGCTGTACAGAGAACTTGCTTCGATAGGAAAAGAAAAGCTGTATTTCTA

B. nigra LR1-1 (1463) AAAGCGAGAAGTCCTGACCTTCGTTACTAGAGCACAGAAAAAGCAACAGTGTGCTGTACAGAGAACTTGCTTCGATAGGAAAAGAAAAGCTGTATTTCTA

B. nigra LR1-2 (1466) AAAGCGAGAAGTCCTGACCTTCGTTACTAGAGCACAGAAAAAGCAACAGTGTGCTGTACAGAGAACTTGCTTCGATAGGAAAAGAAAAGCTGTATTTCTA

B. carinata LR1-2 (1462) AAAGCGAGAAGTCCTGACCTTCGTTACTAGAGCACAGAAAAAGCAACAGTGTGCTGTACAGAGAACTTGCTTCGATAGGAAAAGAAAAGCTGTATTTCTA

B. carinata LR1-1 (1462) AAAGCGAGAAGTCCTGACCTTCGTTACTAGAGCACAGAAAAAGCAACAGTGTGCTGTACAGAGAACTTGCTTCGATAGGAAAAGAAAAGCTGTATTTCTA

B_rapa LRh1a (1347) ACACCAGGCGGGCTTG--CTTCGCTAGAAAAG------AATTCCACTAGTGTGTGCTGCTGAGAGTGAACTATGTTACTCGGAACAA-----TATCTGAA

B_juncea LRh1a (1348) ACACCAGGCGGGCTTG--CTTCGCTAGAAAAG------AATTCCACTAGTGTGTGCTGCTGAGAGTGAACTATGTTACTCGGAACAA-----TATCTGAA

B_napus LRh1a (1348) ACACCAGGCGGGCTTG--CTTCGCTAGAAAAG------AATTCCACTAGTGTGTGCTGCTGAGAGTGAACTATGTTACTCGGAACAA-----TATCTGAA

B_oleracea LRh1a (1309) ACACCAGGCGGGCTTG--CTTCGCTAGAAAAG------AATTCCACTAGTGTGTGCTGCTGAGAGTGAACTATGTTACTCGGAACAA-----TATCTGAA

2701 2800

Raphanus LR1-1 (1559) AG----GAAGCTTAAGGAAAGGCCTTAGTATTCTTTCTTCAAAG----------GCGTTCCCTGAACAACT--ACAGCTCGATAGAGACAACTCGGA--A

Raphanus LR1-2 (1559) AG----GAAGCTTAAGGAAAGGCCTTAGTATTCTTTCTTCAAAG----------GCGTTCCCTGAACAACT--ACAGCTCGATAGAGACAACTCGGA--A

Sinapis LR1-1 (2697) AGCTGGGAATGTTGGGTAAGAGTCCGCCTATTACCTCTAAAAAGTGGAGGAGGTGAGACCCCTGTTGGAGTCAACTTTTGAATTTACCGGCTTTGGAGAA

Sinapis LR1-2 (2697) AGCTGGGAATGTTGGGTAAGAGTCCGCCTATTACCTCTAAAAAGTGGAGGAGGTGAGACCCCTGTTGGAGTCAACTTTTGAATTTACCGGCTTTGGAGAA

B. nigra LR1-1 (1563) AGCTGGGAATGTTGGGTAAGAGTCCGCCTATTACCTCTAAAAAGTGGAGGAGGTGAGACCCCTGTTGGAGTCAACTTTTGAATTTACCGGCTTTGGAGAA

B. nigra LR1-2 (1566) AGCTGGGAATGTTGGGTAAGAGTCCGCCTATTACCTCTAAAAAGTGGAGGAGGTGAGACCCCTGTTGGAGTCAACTTTTGAATTTACCGGCTTTGGAGAA

B. carinata LR1-2 (1562) AGCTGGGAATGTTGGGTAAGAGTCCGCCTATTACCTCTAAAAAGTGGAGGAGGTGAGACCCCTGTTGGAGTCAACTTTTGAATTTACCGGCTTTGGAGAA

B. carinata LR1-1 (1562) AGCTGGGAATGTTGGGTAAGAGTCCGCCTATTACCTCTAAAAAGTGGAGGAGGTGAGACCCCTGTTGGAGTCAACTTTTGAATTTACCGGCTTTGGAGAA

B_rapa LRh1a (1434) AG----GAAGCTTAAGGAAAGGCCTTAGTATTCTTTCTTCAAAG----------GCGTTCCCTGAACAACT--ACAGCTCGATAGAGACAACTCGGA--A

B_juncea LRh1a (1435) AG----GAAGCTTAAGGAAAGGCCTTAGTATTCTTTCTTCAAAG----------GCGTTCCCTGAACAACT--ACAGCTCGATAGAGACAACTCGGA--A

B_napus LRh1a (1435) AG----GAAGCTTAAGGAAAGGCCTTAGTATTCTTTCTTCAAAG----------GCGTTCCCTGAACAACT--ACAGCTCGATAGAGACAACTCGGA--A

B_oleracea LRh1a (1396) AG----GAAGCTTAAGGAAAGGCCTTAGTATTCTTTCTTCAAAG----------GCGTTCCCTGAACAACT--ACAGCTCGATAGAGACAACTCGGA--A

2801 2900

Raphanus LR1-1 (1641) AC--TAGCACTGAAAAAGGGC--ATACTATCAAT--ATGATCAATATGATAT---TACCTCGG-TGTGCTAATCAAAGG--TAAAGAACTGAATACCTAG

Raphanus LR1-2 (1641) AC--TAGCACTGAAAAAGGGC--ATACTATCAAT--ATGATCAATATGATAT---TACCTCGG-TGTGCTAATCAAAGG--TAAAGAACTGAATACCTAG

Sinapis LR1-1 (2797) ACCTTTTCAGTTGCTTAGTGCGAATCCCACGTTTCGAGGGTGGGTAAGGTCTCAGTACCTCGGATATAGCACAGAAAGGCCTATAGCATCCAATACC-AC

Sinapis LR1-2 (2797) ACCTTTTCAGTTGCTTAGTGCGAATCCCACGTTTCGAGGGTGGGTAAGGTCTCAGTACCTCGGATATAGCACAGAAAGGCCTATAGCATCCAATACC-AC

B. nigra LR1-1 (1663) ACCTTTTCAGTTGCTTAGTGCGAATCCCACGTTTCGAGGGTGGGTAAGGTCTCAGTACCTCGGATATAGCACAGAAAGGCCTATAGCATCCAATACC-AC

B. nigra LR1-2 (1666) ACCTTTTCAGTTGCTTAGTGCGAATCCCACGTTTCGAGGGTGGGTAAGGTCTCAGTACCTCGGATATAGCACAGAAAGGCCTATAGCATCCAATACC-AC

B. carinata LR1-2 (1662) ACCTTTTCAGTTGCTTAGTGCGAATCCCACGTTTCGAGGGTGGGTAAGGTCTCAGTACCTCGGATATAGCACAGAAAGGCCTATAGCATCCAATACC-AC

B. carinata LR1-1 (1662) ACCTTTTCAGTTGCTTAGTGCGAATCCCACGTTTCGAGGGTGGGTAAGGTCTCAGTACCTCGGATATAGCACAGAAAGGCCTATAGCATCCAATACC-AC

B_rapa LRh1a (1516) AC--TAGCACTGAAAAAGGGC--ATACTATCAAT--ATGATCAATATGATAT---TACCTCGG-TGTGCTAATCAAAGG--TAAAGAACTGAATACTTAG

B_juncea LRh1a (1517) AC--TAGCACTGAAAAAGGGC--ATACTATCAAT--ATGATCAATATGATAT---TACCTCGG-TGTGCTAATCAAAGG--TAAAGAACTGAATACTTAG

B_napus LRh1a (1517) AC--TAGCACTGAAAAAGGGC--ATACTATCAAT--ATGATCAATATGATAT---TACCTCGG-TGTGCTAATCAAAGG--TAAAGAACTGAATACTTAG

B_oleracea LRh1a (1478) AC--TAGCACTGAAAAAGGGC--ATACTATCAAT--ATGATCAATATGATAT---TACCTCGG-TGTGCTAATCAAAGG--TAAAGAACTGAATACTTAG

2901 3000

Raphanus LR1-1 (1729) ATTTCTCTTATCCTTCCTTAGGTCCTCATGAATTAGAATAAAGTAAGGGAGCACACCGATCGAAACCTGTTTACTTTCGAAAGTTGACCCGCCACCTACT

Raphanus LR1-2 (1729) ATTTCTCTTATCCTTCCTTAGGTCCTCATGAATTAGAATAAAGTAAGGGAGCACACCGATCGAAACCTGTTTACTTTCGAAAGTTGACCCGCCACCTACT

Sinapis LR1-1 (2896) TTTTCAGGT-TACTTCCTTGTGAGCTTGTCAGACAAAGTAGGCGACGGTGTGCTGCACTACATCTCCTCAGCAGTTGATCGGTCAGGTTCCTTGCCTTGC

Sinapis LR1-2 (2896) TTTTCAGGT-TACTTCCTTGTGAGCTTGTCAGACAAAGTAGGCGACGGTGTGCTGCACTACATCTCCTCAGCAGTTGATCGGTCAGGTTCCTTGCCTTGC

B. nigra LR1-1 (1762) TTTTCAGGT-TACTTCCTTGTGAGCTTGTCAGACAAAGTAGGCGACGGTGTGCTGCACTACATCTCCTCAGCAGTTGATCGGTCAGGTTCCTTGCCTTGC

B. nigra LR1-2 (1765) TTTTCAGGT-TACTTCCTTGTGAGCTTGTCAGACAAAGTAGGCGACGGTGTGCTGCACTACATCTCCTCAGCAGTTGATCGGTCAGGTTCCTTGCCTTGC

B. carinata LR1-2 (1761) TTTTCAGGT-TACTTCCTTGTGAGCTTGTCAGACAAAGTAGGCGACGGTGTGCTGCACTACATCTCCTCAGCAGTTGATCGGTCAGGTTCCTTGCCTTGC

B. carinata LR1-1 (1761) TTTTCAGGT-TACTTCCTTGTGAGCTTGTCAGACAAAGTAGGCGACGGTGTGCTGCACTACATCTCCTCAGCAGTTGATCGGTCAGGTTCCTTGCCTTGC

B_rapa LRh1a (1604) ATTTCTCTTATCCTTCCT----------------------------------------------------------------------------------

B_juncea LRh1a (1605) ATTTCTCTTATCCTTCCT----------------------------------------------------------------------------------

B_napus LRh1a (1605) ATTTCTCTTATCCTTCCT----------------------------------------------------------------------------------

B_oleracea LRh1a (1566) ATTTCTCTTATCCTTCCT----------------------------------------------------------------------------------

3001 3100

Raphanus LR1-1 (1829) ACTTGTAGTCAACCAAAATTGCTTCGCTAGGAGTGTGCTATTAAAAGCTGTTGATCGGCCTATGGCACTTTACTAAACCTAGGAGAGGAGAACTGCTACT

Raphanus LR1-2 (1829) ACTTGTAGTCAACCAAAATTGCTTCGCTAGGAGTGTGCTATTAAAAGCTGTTGATCGGCCTATGGCACTTTACTAAACCTAGGAGAGGAGAACTGCTACT

Sinapis LR1-1 (2995) TTAACCCAGCTCGAGTATTATTCGAAACGAGGAATATCCTTACTCTAGAAGCTCAGAGTTAAGAGTTAAGGGAAGGTGTTAGCTAAGGAATTAGGTCTTC

Sinapis LR1-2 (2995) TTAACCCAGCTCGAGTATTATTCGAAACGAGGAATATCCTTACTCTAGAAGCTCAGAGTTAAGAGTTAAGGGAAGGTGTTAGCTAAGGAATTAGGTCTTC

B. nigra LR1-1 (1861) TTAACCCAGCTCGAGTATTATTCGAAACGAGGAATATCCTTACTCTAGAAGCTCAGAGTTAAGAGTTAAGGGAAGGTGTTAGCTAAGGAATTAGGTCTTC

B. nigra LR1-2 (1864) TTAACCCAGCTCGAGTATTATTCGAAACGAGGAATATCCTTACTCTAGAAGCTCAGAGTTAAGAGTTAAGGGAAGGTGTTAGCTAAGGAATTAGGTCTTC

B. carinata LR1-2 (1860) TTAACCCAGCTCGAGTATTATTCGAAACGAGGAATATCCTTACTCTAGAAGCTCAGAGTTAAGAGTTAAGGGAAGGTGTTAGCTAAGGAATTAGGTCTTC

B. carinata LR1-1 (1860) TTAACCCAGCTCGAGTATTATTCGAAACGAGGAATATCCTTACTCTAGAAGCTCAGAGTTAAGAGTTAAGGGAAGGTGTTAGCTAAGGAATTAGGTCTTC

B_rapa LRh1a (1622) ----------------------------------------------------------------------------------------------------

B_juncea LRh1a (1623) ----------------------------------------------------------------------------------------------------

B_napus LRh1a (1623) ----------------------------------------------------------------------------------------------------

B_oleracea LRh1a (1584) ----------------------------------------------------------------------------------------------------

3101 3200

Raphanus LR1-1 (1929) ATCTATTGCATGGGTGCCTGCGTGTAAGAGGTGTAAGAGAAAGAAAGAAATTTCCGTCAACAGGATGAATCCCAGCGAAAAGAAGGCGGAAAGCCTATGA

Raphanus LR1-2 (1929) ATCTATTGCATGGGTGCCTGCGTGTAAGAGGTGTAAGAGAAAGAAAGAAATTTCCGTCAACAGGATGAATCCCAGCGAAAAGAAGGCGGAAAGCCTATGA

Sinapis LR1-1 (3095) CTCTTCGAAAGGAGAACTCTAGTCTACCGTGGTGGGTAGTAGCTACTCCCAGTACATCTATCATCCGTGACATCCATGGCAACTACTACTTTTCATTGCT

Sinapis LR1-2 (3095) CTCTTCGAAAGGAGAACTCTAGTCTACCGTGGTGGGTAGTAGCTACTCCCAGTACATCTATCATCCGTGACATCCATGGCAACTACTACTTTTCATTGCT

B. nigra LR1-1 (1961) CTCTTCGAAAGGAGAACTCTAGTCTACCGTGGTGGGTAGTAGCTACTCCCAGTACATCTATCATCCGTGACATCCATGGCAACTACTACTTTTCATTGCT

B. nigra LR1-2 (1964) CTCTTCGAAAGGAGAACTCTAGTCTACCGTGGTGGGTAGTAGCTACTCCCAGTACATCTATCATCCGTGACATCCATGGCAACTACTACTTTTCATTGCT

B. carinata LR1-2 (1960) CTCTTCGAAAGGAGAACTCTAGTCTACCGTGGTGGGTAGTAGCTACTCCCAGTACATCTATCATCCGTGACATCCATGGCAACTACTACTTTTCATTGCT

B. carinata LR1-1 (1960) CTCTTCGAAAGGAGAACTCTAGTCTACCGTGGTGGGTAGTAGCTACTCCCAGTACATCTATCATCCGTGACATCCATGGCAACTACTACTTTTCATTGCT

B_rapa LRh1a (1622) ----------------------------------------------------------------------------------------------------

B_juncea LRh1a (1623) ----------------------------------------------------------------------------------------------------

B_napus LRh1a (1623) ----------------------------------------------------------------------------------------------------

B_oleracea LRh1a (1584) ----------------------------------------------------------------------------------------------------

3201 3300

Raphanus LR1-1 (2029) AAGGTGGAAAGCCCTAGCGGAGCAATCTTAAAGATGGAAAGCTCTTAAAGGTGGAAAGCCAGCACAAGCACACTACTGTGAAAGCTAAGAGTACTTCTAT

Raphanus LR1-2 (2029) AAGGTGGAAAGCCCTAGCGGAGCAATCTTAAAGATGGAAAGCTCTTAAAGGTGGAAAGCCAGCACAAGCACACTACTGTGAAAGCTAAGAGTACTTCTAT

Sinapis LR1-1 (3195) GTGCTGTTTAATCGATCGAACAAAACTCCTAAGGTAGAGATCTTAAGAAGAGGACGAGCTCAACTCCCGATTGTTCAAGCTTAGATACCTCTTTGATTTG

Sinapis LR1-2 (3195) GTGCTGTTTAATCGATCGAACAAAACTCCTAAGGTAGAGATCTTAAGAAGAGGACGAGCTCAACTCCCGATTGTTCAAGCTTAGATACCTCTTTGATTTG

B. nigra LR1-1 (2061) GTGCTGTTTAATCGATCGAACAAAACTCCTAAGGTAGAGATCTTAAGAAGAGGACGAGCTCAACTCCCGATTGTTCAAGCTTAGATACCTCTTTGATTTG

B. nigra LR1-2 (2064) GTGCTGTTTAATCGATCGAACAAAACTCCTAAGGTAGAGATCTTAAGAAGAGGACGAGCTCAACTCCCGATTGTTCAAGCTTAGATACCTCTTTGATTTG

B. carinata LR1-2 (2060) GTGCTGTTTAATCGATCGAACAAAACTCCTAAGGTAGAGATCTTAAGAAGAGGACGAGCTCAACTCCCGATTGTTCAAGCTTAGATACCTCTTTGATTTG

B. carinata LR1-1 (2060) GTGCTGTTTAATCGATCGAACAAAACTCCTAAGGTAGAGATCTTAAGAAGAGGACGAGCTCAACTCCCGATTGTTCAAGCTTAGATACCTCTTTGATTTG

B_rapa LRh1a (1622) ----------------------------------------------------------------------------------------------------

B_juncea LRh1a (1623) ----------------------------------------------------------------------------------------------------

B_napus LRh1a (1623) ----------------------------------------------------------------------------------------------------

B_oleracea LRh1a (1584) ----------------------------------------------------------------------------------------------------

3301 3400

Raphanus LR1-1 (2129) ATTAGGAATTTTGCTAGTGGCGGATACGTACTATCTTCTTTATATTGACATTCTGCTACCCGGGAATCCAGTTCGTAAAACTCGGAGATATCAAACGGAA

Raphanus LR1-2 (2129) ATTAGGAATTTTGCTAGTGGCGGATACGTACTATCTTCTTTATATTGACATTCTGCTACCCGGGAATCCAGTTCGTAAAACTCGGAGATATCAAACGGAA

Sinapis LR1-1 (3295) GGATTGACGAAACAGTATAAACCTTTATAATAGGCCTATTTTGTGCGTTTAATCACCTTTCTTTCATCTCTGAGCCAGCTATCCTTTCAGAATAGGGCTT

Sinapis LR1-2 (3295) GGATTGACGAAACAGTATAAACCTTTATAATAGGCCTATTTTGTGCGTTTAATCACCTTTCTTTCATCTCTGAGCCAGCTATCCTTTCAGAATAGGGCTT

B. nigra LR1-1 (2161) GGATTGACGAAACAGTATAAACCTTTATAATAGGCCTATTTTGTGCGTTTAATCACCTTTCTTTCATCTCTGAGCCAGCTATCCTTTCAGAATAGGGCTT

B. nigra LR1-2 (2164) GGATTGACGAAACAGTATAAACCTTTATAATAGGCCTATTTTGTGCGTTTAATCACCTTTCTTTCATCTCTGAGCCAGCTATCCTTTCAGAATAGGGCTT

B. carinata LR1-2 (2160) GGATTGACGAAACAGTATAAACCTTTATAATAGGCCTATTTTGTGCGTTTAATCACCTTTCTTTCATCTCTGAGCCAGCTATCCTTTCAGAATAGGGCTT

B. carinata LR1-1 (2160) GGATTGACGAAACAGTATAAACCTTTATAATAGGCCTATTTTGTGCGTTTAATCACCTTTCTTTCATCTCTGAGCCAGCTATCCTTTCAGAATAGGGCTT

B_rapa LRh1a (1622) ----------------------------------------------------------------------------------------------------

B_juncea LRh1a (1623) ----------------------------------------------------------------------------------------------------

B_napus LRh1a (1623) ----------------------------------------------------------------------------------------------------

B_oleracea LRh1a (1584) ----------------------------------------------------------------------------------------------------

3401 3500

Raphanus LR1-1 (2229) GTAAAAAAAAGCAGAGAAGGATTAAGACTAACCACTTTTTCGACATCCCTTCATGAAGCGCAGCAACATTTCGGAAGACTGCTAAAAGCGAGAAGTCCTG

Raphanus LR1-2 (2229) GTAAAAAAAAGCAGAGAAGGATTAAGACTAACCACTTTTTCGACATCCCTTCATGAAGCGCAGCAACATTTCGGAAGACTGCTAAAAGCGAGAAGTCCTG

Sinapis LR1-1 (3395) TCCGCTTTCTTTTAAGGTGAGGAATCTTAGGAGTTCAGCTTTTTCGATTAAACGAAGAATTCTGTCATTTCAGATGGGATTCCAAAGCAAGGCTAGTTAT

Sinapis LR1-2 (3395) TCCGCTTTCTTTTAAGGTGAGGAATCTTAGGAGTTCAGCTTTTTCGATTAAACGAAGAATTCTGTCATTTCAGATGGGATTCCAAAGCAAGGCTAGTTAT

B. nigra LR1-1 (2261) TCCGCTTTCTTTTAAGGTGAGGAATCTTAGGAGTTCAGCTTTTTCGATTAAACGAAGAATTCTGTCATTTCAGATGGGATTCCAAAGCAAGGCTAGTTAT

B. nigra LR1-2 (2264) TCCGCTTTCTTTTAAGGTGAGGAATCTTAGGAGTTCAGCTTTTTCGATTAAACGAAGAATTCTGTCATTTCAGATGGGATTCCAAAGCAAGGCTAGTTAT

B. carinata LR1-2 (2260) TCCGCTTTCTTTTAAGGTGAGGAATCTTAGGAGTTCAGCTTTTTCGATTAAACGAAGAATTCTGTCATTTCAGATGGGATTCCAAAGCAAGGCTAGTTAT

B. carinata LR1-1 (2260) TCCGCTTTCTTTTAAGGTGAGGAATCTTAGGAGTTCAGCTTTTTCGATTAAACGAAGAATTCTGTCATTTCAGATGGGATTCCAAAGCAAGGCTAGTTAT

B_rapa LRh1a (1622) ----------------------------------------------------------------------------------------------------

B_juncea LRh1a (1623) ----------------------------------------------------------------------------------------------------

B_napus LRh1a (1623) ----------------------------------------------------------------------------------------------------

B_oleracea LRh1a (1584) ----------------------------------------------------------------------------------------------------

3501 3600

Raphanus LR1-1 (2329) ACCTTCGTTACTAGAGCACAGAAAAAGCAACAGTGTGCTGTACAGAGAACTTGCTTCGATAGGAAAAGAAAAGCTGTATTTCTAAGCTGGGAATGTTGGG

Raphanus LR1-2 (2329) ACCTTCGTTACTAGAGCACAGAAAAAGCAACAGTGTGCTGTACAGAGAACTTGCTTCGATAGGAAAAGAAAAGCTGTATTTCTAAGCTGGGAATGTTGGG

Sinapis LR1-1 (3495) CTATGTTAGCTTCATTCCTGTGAAGTTGGTTTCTAGTTTTTATCTTTGAGTTGGCAGTAACATGACTAGCAGCATAGTACGCACACACGAAAGTCAAGGG

Sinapis LR1-2 (3495) CTATGTTAGCTTCATTCCTGTGAAGTTGGTTTCTAGTTTTTATCTTTGAGTTGGCAGTAACATGACTAGCAGCATAGTACGCACACACGAAAGTCAAGGG

B. nigra LR1-1 (2361) CTATGTTAGCTTCATTCCTGTGAAGTTGGTTTCTAGTTTTTATCTTTGAGTTGGCAGTAACATGACTAGCAGCATAGTACGCACACACGAAAGTCAAGGG

B. nigra LR1-2 (2364) CTATGTTAGCTTCATTCCTGTGAAGTTGGTTTCTAGTTTTTATCTTTGAGTTGGCAGTAACATGACTAGCAGCATAGTACGCACACACGAAAGTCAAGGG

B. carinata LR1-2 (2360) CTATGTTAGCTTCATTCCTGTGAAGTTGGTTTCTAGTTTTTATCTTTGAGTTGGCAGTAACATGACTAGCAGCATAGTACGCACACACGAAAGTCAAGGG

B. carinata LR1-1 (2360) CTATGTTAGCTTCATTCCTGTGAAGTTGGTTTCTAGTTTTTATCTTTGAGTTGGCAGTAACATGACTAGCAGCATAGTACGCACACACGAAAGTCAAGGG

B_rapa LRh1a (1622) ----------------------------------------------------------------------------------------------------

B_juncea LRh1a (1623) ----------------------------------------------------------------------------------------------------

B_napus LRh1a (1623) ----------------------------------------------------------------------------------------------------

B_oleracea LRh1a (1584) ----------------------------------------------------------------------------------------------------

3601 3700

Raphanus LR1-1 (2429) TAAGAGTCCGCCTATTACCTCTAAAAAGTGGAGGAGGTGAGATCCCTGTTGGAGTCAACTTTTGAATTTACCGGCTTTGGAGAAACCTTTTCAGTTGCTT

Raphanus LR1-2 (2429) TAAGAGTCCGCCTATTACCTCTAAAAAGTGGAGGAGGTGAGATCCCTGTTGGAGTCAACTTTTGAATTTACCGGCTTTGGAGAAACCTTTTCAGTTGCTT

Sinapis LR1-1 (3595) ATTGTCTGGCCCTGCTACCTACCCAACATGAGCACACTCCGAAATTAGAGTAGCTATCTATTTCATAAGAGACCTCTTGCAGATTGAAGCATGATTGGGC

Sinapis LR1-2 (3595) ATTGTCTGGCCCTGCTACCTACCCAACATGAGCACACTCCGAAATTAGAGTAGCTATCTATTTCATAAGAGACCTCTTGCAGATTGAAGCATGATTGGGC

B. nigra LR1-1 (2461) ATTGTCTGGCCCTGCTACCTACCCAACATGAGCACACTCCGAAATTAGAGTAGCTATCTATTTCATAAGAGACCTCTTGCAGATTGAAGCATGATTGGGC

B. nigra LR1-2 (2464) ATTGTCTGGCCCTGCTACCTACCCAACATGAGCACACTCCGAAATTAGAGTAGCTATCTATTTCATAAGAGACCTCTTGCAGATTGAAGCATGATTGGGC

B. carinata LR1-2 (2460) ATTGTCTGGCCCTGCTACCTACCCAACATGAGCACACTCCGAAATTAGAGTAGCTATCTATTTCATAAGAGACCTCTTGCAGATTGAAGCATGATTGGGC

B. carinata LR1-1 (2460) ATTGTCTGGCCCTGCTACCTACCCAACATGAGCACACTCCGAAATTAGAGTAGCTATCTATTTCATAAGAGACCTCTTGCAGATTGAAGCATGATTGGGC

B_rapa LRh1a (1622) ----------------------------------------------------------------------------------------------------

B_juncea LRh1a (1623) ----------------------------------------------------------------------------------------------------

B_napus LRh1a (1623) ----------------------------------------------------------------------------------------------------

B_oleracea LRh1a (1584) ----------------------------------------------------------------------------------------------------

3701 3800

Raphanus LR1-1 (2529) AGTGCGAATCCCACGTTTCGAGGGTGGGTAAGGTCTCAGTACCTCGGATATAGCACAGAAAGGCCTATAGCATCCAATACCACTTTTCAGGTTACTTCCT

Raphanus LR1-2 (2529) AGTGCGAATCCCACGTTTCGAGGGTGGGTAAGGTCTCAGTACCTCGGATATAGCACAGAAAGGCCTATAGCATCCAATACCACTTTTCAGGTTACTTCCT

Sinapis LR1-1 (3695) TCTCCGCTTCTCTTCAGATGGAACTTCGCCATGTC------CCTCGAGTACTGTTCCTAGAGTATAGTAGAGTACGGATCGATTGAACTGGTTTTTGTCG

Sinapis LR1-2 (3695) TCTCCGCTTCTCTTCAGATGGAACTTCGCCATGTC------CCTCGAGTACTGTTCCTAGAGTATAGTAGAGTACGGATCGATTGAACTGGTTTTTGTCG

B. nigra LR1-1 (2561) TCTCCGCTTCTCTTCAGATGGAACTTCGCCATGTCCATGTCCCTCGAGTACTGTTCCTAGAGTATAGTAGAGTACGGATCGATTGAACTGGTTTCTGTCG

B. nigra LR1-2 (2564) TCTCCGCTTCTCTTCAGATGGAACTTCGCCATGTCCATGTCCCTCGAGTACTGTTCCTAGAGTATAGTAGAGTACGGATCGATTGAACTGGTTTCTGTCG

B. carinata LR1-2 (2560) TCTCCGCTTCTCTTCAGATGGAACTTCGCCATGTCCATGTCCCTCGAGTACTGTTCCTAGAGTATAGTAGAGTACGGATCGATTGAACTGGTTTCTGTCG

B. carinata LR1-1 (2560) TCTCCGCTTCTCTTCAGATGGAACTTCGCCATGTCCATGTCCCTCGAGTACTGTTCCTAGAGTATAGTAGAGTACGGATCGATTGAACTGGTTTCTGTCG

B_rapa LRh1a (1622) ----------------------------------------------------------------------------------------------------

B_juncea LRh1a (1623) ----------------------------------------------------------------------------------------------------

B_napus LRh1a (1623) ----------------------------------------------------------------------------------------------------

B_oleracea LRh1a (1584) ----------------------------------------------------------------------------------------------------

3801 3900

Raphanus LR1-1 (2629) TGTGAGCTTGTCAGACAAAGTAGGCGACGGTGTGCTGCACTACATCTCCTCAGCAGTTGATCGGTCAGGTTCCTTGCCTTGCTTAACCCAGCTCGAGTAT

Raphanus LR1-2 (2629) TGTGAGCTTGTCAGACAAAGTAGGCGACGGTGTGCTGCACTACATCTCCTCAGCAGTTGATCGGTCAGGTTCCTTGCCTTGCTTAACCCAGCTCGAGTAT

Sinapis LR1-1 (3789) TACCCCTAACGGTACAGTTATGACCTAATGCGGGGTCTCTCTCAGGCAGAAGATCAACCGATGTACGATGTTGGACCTAATGAGAGGTCCTTCTCTGTCA

Sinapis LR1-2 (3789) TACCCCTAACGGTACAGTTATGACCTAATGCGGGGTCTCTCTCAGGCAGAAGATCAACCGATGTACGATGTTGGACCTAATGAGAGGTCCTTCTCTGTCA

B. nigra LR1-1 (2661) TACCCCTAACGGTACAGTTATGACCTAATGCGGGGTCTCTCTCAGGCAGAAGATCAACCGATGTACGATGTTGGACCTAATGAGAGGTCCTTCTCTGTCA

B. nigra LR1-2 (2664) TACCCCTAACGGTACAGTTATGACCTAATGCGGGGTCTCTCTCAGGCAGAAGATCAACCGATGTACGATGTTGGACCTAATGAGAGGTCCTTCTCTGTCA

B. carinata LR1-2 (2660) TACCCCTAACGGTACAGTTATGACCTAATGCGGGGTCTCTCTCAGGCAGAAGATCAACCGATGTACGATGTTGGACCTAATGAGAGGTCCTTCTCTGTCA

B. carinata LR1-1 (2660) TACCCCTAACGGTACAGTTATGACCTAATGCGGGGTCTCTCTCAGGCAGAAGATCAACCGATGTACGATGTTGGACCTAATGAGAGGTCCTTCTCTGTCA

B_rapa LRh1a (1622) ----------------------------------------------------------------------------------------------------

B_juncea LRh1a (1623) ----------------------------------------------------------------------------------------------------

B_napus LRh1a (1623) ----------------------------------------------------------------------------------------------------

B_oleracea LRh1a (1584) ----------------------------------------------------------------------------------------------------

3901 4000

Raphanus LR1-1 (2729) TATTCGAAACGAGGAATATCCTTACTCTAGAAGCTCAGAGTTAAGAGTTAAGGGAAGGTGTTAGCTAAGGAATTAGGTCTTCCTCTTCGAAAGGAGAACT

Raphanus LR1-2 (2729) TATTCGAAACGAGGAATATCCTTACTCTAGAAGCTCAGAGTTAAGAGTTAAGGGAAGGTGTTAGCTAAGGAATTAGGTCTTCCTCTTCGAAAGGAGAACT

Sinapis LR1-1 (3889) GGGTTTATAGGTCAACTGGTTGCTTCGCTAGAGTAGGACCTAACCCATGTACTGTGAGTGTTGATTAGTCACCCTGATATCGAGTGAGCATTCGGGGGTG

Sinapis LR1-2 (3889) GGGTTTATAGGTCAACTGGTTGCTTCGCTAGAGTAGGACCTAACCCATGTACTGTGAGTGTTGATTAGTCACCCTGATATCGAGTGAGCATTCGGGGGTG

B. nigra LR1-1 (2761) GGGTTTATAGGTCAACTGGTTGCTTCGCTAGAGTAGGACCTAACCCATGTACTGTGAGTGTTGATTAGTCACCCTGATATCGAGTGAGCATTCGGGGGTG

B. nigra LR1-2 (2764) GGGTTTATAGGTCAACTGGTTGCTTCGCTAGAGTAGGACCTAACCCATGTACTGTGAGTGTTGATTAGTCACCCTGATATCGAGTGAGCATTCGGGGGTG

B. carinata LR1-2 (2760) GGGTTTATAGGTCAACTGGTTGCTTCGCTAGAGTAGGACCTAACCCATGTACTGTGAGTGTTGATTAGTCACCCTGATATCGAGTGAGCATTCGGGGGTG

B. carinata LR1-1 (2760) GGGTTTATAGGTCAACTGGTTGCTTCGCTAGAGTAGGACCTAACCCATGTACTGTGAGTGTTGATTAGTCACCCTGATATCGAGTGAGCATTCGGGGGTG

B_rapa LRh1a (1622) ----------------------------------------------------------------------------------------------------

B_juncea LRh1a (1623) ----------------------------------------------------------------------------------------------------

B_napus LRh1a (1623) ----------------------------------------------------------------------------------------------------

B_oleracea LRh1a (1584) ----------------------------------------------------------------------------------------------------

4001 4100

Raphanus LR1-1 (2829) CTAGTCTACCGTGGTGGGTAGTAGCTACTCCCAGTACATCTATCATCCGTGACATCCATGGCAACTACTACTTTTCATTGCTGTGCTGTTTAATCGATCG

Raphanus LR1-2 (2829) CTAGTCTACCGTGGTGGGTAGTAGCTACTCCCAGTACATCTATCATCCGTGACATCCATGGCAACTACTACTTTTCATTGCTGTGCTGTTTAATCGATCG

Sinapis LR1-1 (3989) TAGACTTCACACTTTAACAGGTCATCTGTCTTTCGAAGTTTTCTGTAACACAGAGATGTAGTTGCAAGGCAAAGGTCAACTAGCTTGCTTCGCTAGGTTG

Sinapis LR1-2 (3989) TAGACTTCACACTTTAACAGGTCATCTGTCTTTCGAAGTTTTCTGTAACACAGAGATGTAGTTGCAAGGCAAAGGTCAACTAGCTTGCTTCGCTAGGTTG

B. nigra LR1-1 (2861) TAGACTTCACACTTTAACAGGTCATCTGTCTTTCGAAGTTTTCTGTAACACAGAGATGTAGTTGCAAGGCAAAGGTCAACTAGCTTGCTTCGCTAGGTTG

B. nigra LR1-2 (2864) TAGACTTCACACTTTAACAGGTCATCTGTCTTTCGAAGTTTTCTGTAACACAGAGATGTAGTTGCAAGGCAAAGGTCAACTAGCTTGCTTCGCTAGGTTG

B. carinata LR1-2 (2860) TAGACTTCACACTTTAACAGGTCATCTGTCTTTCGAAGTTTTCTGTAACACAGAGATGTAGTTGCAAGGCAAAGGTCAACTAGCTTGCTTCGCTAGGTTG

B. carinata LR1-1 (2860) TAGACTTCACACTTTAACAGGTCATCTGTCTTTCGAAGTTTTCTGTAACACAGAGATGTAGTTGCAAGGCAAAGGTCAACTAGCTTGCTTCGCTAGGTTG

B_rapa LRh1a (1622) ----------------------------------------------------------------------------------------------------

B_juncea LRh1a (1623) ----------------------------------------------------------------------------------------------------

B_napus LRh1a (1623) ----------------------------------------------------------------------------------------------------

B_oleracea LRh1a (1584) ----------------------------------------------------------------------------------------------------

4101 4200

Raphanus LR1-1 (2929) AACAAAACTCCTAAGGTAGAGATCTTAAGAAGAGGACGAGCTCAACTCCCGATTGTTCAAGCTTAGATACCTCTTTGATTTGGGATTGACGAAACAGTAT

Raphanus LR1-2 (2929) AACAAAACTCCTAAGGTAGAGATCTTAAGAAGAGGACGAGCTCAACTCCCGATTGTTCAAGCTTAGATACCTCTTTGATTTGGGATTGACGAAACAGTAT

Sinapis LR1-1 (4089) CTTCGCTAGGGACTTAAGGAGAAGTTATTTTCTGTAGCACAGAGATGACTTTAGTAAGTTGCAAGGCGAAGGCCTCAACGATTGTGGTTAATCTATCTTG

Sinapis LR1-2 (4089) CTTCGCTAGGGACTTAAGGAGAAGTTATTTTCTGTAGCACAGAGATGACTTTAGTAAGTTGCAAGGCGAAGGCCTCAACGATTGTGGTTAATCTATCTTG

B. nigra LR1-1 (2961) CTTCGCTAGGGACTTAAGGAGAAGTTATTTTCTGTAGCACAGAGATGACTTTAGTAAGTTGCAAGGCGAAGGCCTCAACGATTGTGGTTAATCTATCTTG

B. nigra LR1-2 (2964) CTTCGCTAGGGACTTAAGGAGAAGTTATTTTCTGTAGCACAGAGATGACTTTAGTAAGTTGCAAGGCGAAGGCCTCAACGATTGTGGTTAATCTATCTTG

B. carinata LR1-2 (2960) CTTCGCTAGGGACTTAAGGAGAAGTTATTTTCTGTAGCACAGAGATGACTTTAGTAAGTTGCAAGGCGAAGGCCTCAACGATTGTGGTTAATCTATCTTG

B. carinata LR1-1 (2960) CTTCGCTAGGGACTTAAGGAGAAGTTATTTTCTGTAGCACAGAGATGACTTTAGTAAGTTGCAAGGCGAAGGCCTCAACGATTGTGGTTAATCTATCTTG

B_rapa LRh1a (1622) ----------------------------------------------------------------------------------------------------

B_juncea LRh1a (1623) ----------------------------------------------------------------------------------------------------

B_napus LRh1a (1623) ----------------------------------------------------------------------------------------------------

B_oleracea LRh1a (1584) ----------------------------------------------------------------------------------------------------

4201 4300

Raphanus LR1-1 (3029) AAACCTTTCTAATAGGCCTATTTTGTGCGTTTAATCACCTTTCTTTCATCTCTGAGCCAGCTATCCTTTCAGAATAGGGCTTTCCGCTTTCTTTTAAGGT

Raphanus LR1-2 (3029) AAACCTTTCTAATAGGCCTATTTTGTGCGTTTAATCACCTTTCTTTCATCTCTGAGCCAGCTATCCTTTCAGAATAGGGCTTTCCGCTTTCTTTTAAGGT

Sinapis LR1-1 (4189) GTATCTTTGTGATGAGGTATGGCTTATCTGTGCTGGGGTGTGCTTGGGAGTCAAATGCTAGGGTCATGCGAAAAGTCCTATTTCCAATTCCGATCTCATA

Sinapis LR1-2 (4189) GTATCTTTGTGATGAGGTATGGCTTATCTGTGCTGGGGTGTGCTTGGGAGTCAAATGCTAGGGTCATGCGAAAAGTCCTATTTCCAATTCCGATCTCATA

B. nigra LR1-1 (3061) GTATCTTTGTGATGAGGTATGGCTTATCTGTGCTGGGGTGTGCTTGGGAGTCAAATGCTAGGGTCATGCGAAAAGTCCTATTTCCAATTCCGATCTCATA

B. nigra LR1-2 (3064) GTATCTTTGTGATGAGGTATGGCTTATCTGTGCTGGGGTGTGCTTGGGAGTCAAATGCTAGGGTCATGCGAAAAGTCCTATTTCCAATTCCGATCTCATA

B. carinata LR1-2 (3060) GTATCTTTGTGATGAGGTATGGCTTATCTGTGCTGGGGTGTGCTTGGGAGTCAAATGCTAGGGTCATGCGAAAAGTCCTATTTCCAATTCCGATCTCATA

B. carinata LR1-1 (3060) GTATCTTTGTGATGAGGTATGGCTTATCTGTGCTGGGGTGTGCTTGGGAGTCAAATGCTAGGGTCATGCGAAAAGTCCTATTTCCAATTCCGATCTCATA

B_rapa LRh1a (1622) ----------------------------------------------------------------------------------------------------

B_juncea LRh1a (1623) ----------------------------------------------------------------------------------------------------

B_napus LRh1a (1623) ----------------------------------------------------------------------------------------------------

B_oleracea LRh1a (1584) ----------------------------------------------------------------------------------------------------

4301 4400

Raphanus LR1-1 (3129) GAGGAATCTTAGGAGTTCAGCTTTTTCGATTAAACGAAGAATTCTGTCATTTCAGATGGGATTCCAAAGCAAGGCTAGTTATCTATGTTAGCTTCATTCC

Raphanus LR1-2 (3129) GAGGAATCTTAGGAGTTCAGCTTTTTCGATTAAACGAAGAATTCTGTCATTTCAGATGGGATTCCAAAGCAAGGCTAGTTATCTATGTTAGCTTCATTCC

Sinapis LR1-1 (4289) TCTAAGGAACGGGAGTTCTTAACAGAAGAAAGGCCATAGACTCCGTTTGGTACGTATCTGATATGTGACAAATCCTAAATCTGCAAGGTATCTTATCTCT

Sinapis LR1-2 (4289) TCTAAGGAACGGGAGTTCTTAACAGAAGAAAGGCCATAGACTCCGTTTGGTACGTATCTGATATGTGACAAATCCTAAATCTGCAAGGTATCTTATCTCT

B. nigra LR1-1 (3161) TCTAAGGAACGGGAGTTCTTAACAGAAGAAAGGCCATAGACTCCGTTTGGTACGTATCTGATATGTGACAAATCCTAAATCTGCAAGGTATCTTATCTCT

B. nigra LR1-2 (3164) TCTAAGGAACGGGAGTTCTTAACAGAAGAAAGGCCATAGACTCCGTTTGGTACGTATCTGATATGTGACAAATCCTAAATCTGCAAGGTATCTTATCTCT

B. carinata LR1-2 (3160) TCTAAGGAACGGGAGTTCTTAACAGAAGAAAGGCCATAGACTCCGTTTGGTACGTATCTGATATGTGACAAATCCTAAATCTGCAAGGTATCTTATCTCT

B. carinata LR1-1 (3160) TCTAAGGAACGGGAGTTCTTAACAGAAGAAAGGCCATAGACTCCGTTTGGTACGTATCTGATATGTGACAAATCCTAAATCTGCAAGGTATCTTATCTCT

B_rapa LRh1a (1622) ----------------------------------------------------------------------------------------------------

B_juncea LRh1a (1623) ----------------------------------------------------------------------------------------------------

B_napus LRh1a (1623) ----------------------------------------------------------------------------------------------------

B_oleracea LRh1a (1584) ----------------------------------------------------------------------------------------------------

4401 4500

Raphanus LR1-1 (3229) TGTGAAGTTGGTTTCTAGTTTTGATCTTTGAGTTGGCAGTAACATGACTAGCAGCATAGTACGCACACACGAAAGTCAAGGGATTGTCTGGCCCTGCTAC

Raphanus LR1-2 (3229) TGTGAAGTTGGTTTCTAGTTTTGATCTTTGAGTTGGCAGTAACATGACTAGCAGCATAGTACGCACACACGAAAGTCAAGGGATTGTCTGGCCCTGCTAC

Sinapis LR1-1 (4389) CTCAGTTATTAATATGGTGCTGGACTAGCGAAGCAACCCTTTTGAAGAAGGAATCTTAGGAGTTCTGCAGCATATGGATGGCTTAAAGGAAGAAATCAGA

Sinapis LR1-2 (4389) CTCAGTTATTAATATGGTGCTGGACTAGCGAAGCAACCCTTTTGAAGAAGGAATCTTAGGAGTTCTGCAGCATATGGATGGCTTAAAGGAAGAAATCAGA

B. nigra LR1-1 (3261) CTCAGTTATTAATATGGTGCTGGACTAGCGAAGCAACCCTTTTGAAGAAGGAATCTTAGGAGTTCTGCAGCATATGGATGGCTTAAAGGAAGAAATCAGA

B. nigra LR1-2 (3264) CTCAGTTATTAATATGGTGCTGGACTAGCGAAGCAACCCTTTTGAAGAAGGAATCTTAGGAGTTCTGCAGCATATGGATGGCTTAAAGGAAGAAATCAGA

B. carinata LR1-2 (3260) CTCAGTTATTAATATGGTGCTGGACTAGCGAAGCAACCCTTTTGAAGAAGGAATCTTAGGAGTTCTGCAGCATATGGATGGCTTAAAGGAAGAAATCAGA

B. carinata LR1-1 (3260) CTCAGTTATTAATATGGTGCTGGACTAGCGAAGCAACCCTTTTGAAGAAGGAATCTTAGGAGTTCTGCAGCATATGGATGGCTTAAAGGAAGAAATCAGA

B_rapa LRh1a (1622) ----------------------------------------------------------------------------------------------------

B_juncea LRh1a (1623) ----------------------------------------------------------------------------------------------------

B_napus LRh1a (1623) ----------------------------------------------------------------------------------------------------

B_oleracea LRh1a (1584) ----------------------------------------------------------------------------------------------------

4501 4600

Raphanus LR1-1 (3329) CTACCCAACATGAGCACACTCCGAAATTAGAGTAGCTATCTATTTCATAAGAGACCTCTTGCAGATTGAAGCATGATTGGGCTCTCCGCTTCTCTTCAGA

Raphanus LR1-2 (3329) CTACCCAACATGAGCACACTCCGAAATTAGAGTAGCTATCTATTTCATAAGAGACCTCTTGCAGATTGAAGCATGATTGGGCTCTCCGCTTCTCTTCAGA

Sinapis LR1-1 (4489) CATCTGAGATAAGCAGGGCTGTTGTCTAATCTGAGGAATGCATACGAATCCTATAGTAAGTTCACGGGTAATTCTCCGCTTAGTTCAGTAATCTCCTGAA

Sinapis LR1-2 (4489) CATCTGAGATAAGCAGGGCTGTTGTCTAATCTGAGGAATGCATACGAATCCTATAGTAAGTTCACGGGTAATTCTCCGCTTAGTTCAGTAATCTCCTGAA

B. nigra LR1-1 (3361) CATCTGAGATAAGCAGGGCTGTTGTCTAATCTGAGGAATGCATACGAATCCTATAGTAAGTTCACGGGTAATTCTCCGCTTAGTTCAGTAATCTCCTGAA

B. nigra LR1-2 (3364) CATCTGAGATAAGCAGGGCTGTTGTCTAATCTGAGGAATGCATACGAATCCTATAGTAAGTTCACGGGTAATTCTCCGCTTAGTTCAGTAATCTCCTGAA

B. carinata LR1-2 (3360) CATCTGAGATAAGCAGGGCTGTTGTCTAATCTGAGGAATGCATACGAATCCTATAGTAAGTTCACGGGTAATTCTCCGCTTAGTTCAGTAATCTCCTGAA

B. carinata LR1-1 (3360) CATCTGAGATAAGCAGGGCTGTTGTCTAATCTGAGGAATGCATACGAATCCTATAGTAAGTTCACGGGTAATTCTCCGCTTAGTTCAGTAATCTCCTGAA

B_rapa LRh1a (1622) ----------------------------------------------------------------------------------------------------

B_juncea LRh1a (1623) ----------------------------------------------------------------------------------------------------

B_napus LRh1a (1623) ----------------------------------------------------------------------------------------------------

B_oleracea LRh1a (1584) ----------------------------------------------------------------------------------------------------

4601 4700

Raphanus LR1-1 (3429) TGGAACTTCGCCATGTCCATGTCCCTCGAGTACTGTTCCTAGAGTATAGTAGAGTACGGATCGATTGAACTGGTTTCTGTCGTACCCCTAACGGTACAGT

Raphanus LR1-2 (3429) TGGAACTTCGCCATGTCCATGTCCCTCGAGTACTGTTCCTAGAGTATAGTAGAGTACGGATCGATTGAACTGGTTTCTGTCGTACCCCTAACGGTACAGT

Sinapis LR1-1 (4589) AGTTGGGTGAGCTATTCTGTTTTCCGAGGTACCAACACTTTCAACCACTTTATTTCCGAGGTCCTAAACCTTAAACCAGTTTTTAAACGCGATTAAACGC

Sinapis LR1-2 (4589) AGTTGGGTGAGCTATTCTGTTTTCCGAGGTACCAACACTTTCAACCACTTTATTTCCGAGGTCCTAAACCTTAAACCAGTTTTTAAACGCGATTAAACGC

B. nigra LR1-1 (3461) AGTTGGGTGAGCTATTCTGTTTTCCGAGGTACCAACACTTTCAACCACTTTATTTCCGAGGTCCTAAACCTTAAACCAGTTTTTAAACGCGATTAAACGC

B. nigra LR1-2 (3464) AGTTGGGTGAGCTATTCTGTTTTCCGAGGTACCAACACTTTCAACCACTTTATTTCCGAGGTCCTAAACCTTAAACCAGTTTTTAAACGCGATTAAACGC

B. carinata LR1-2 (3460) AGTTGGGTGAGCTATTCTGTTTTCCGAGGTACCAACACTTTCAACCACTTTATTTCCGAGGTCCTAAACCTTAAACCAGTTTTTAAACGCGATTAAACGC

B. carinata LR1-1 (3460) AGTTGGGTGAGCTATTCTGTTTTCCGAGGTACCAACACTTTCAACCACTTTATTTCCGAGGTCCTAAACCTTAAACCAGTTTTTAAACGCGATTAAACGC

B_rapa LRh1a (1622) ----------------------------------------------------------------------------------------------------

B_juncea LRh1a (1623) ----------------------------------------------------------------------------------------------------

B_napus LRh1a (1623) ----------------------------------------------------------------------------------------------------

B_oleracea LRh1a (1584) ----------------------------------------------------------------------------------------------------

4701 4800

Raphanus LR1-1 (3529) TATGACCTAATGCGGGGTCTCTCTCAGGCAGAAGATCAACCGATGTACGATGTTGGACCTAATGAGAGGTCCTTCTCTGTCAGGGTTTATAGGTCAACTG

Raphanus LR1-2 (3529) TATGACCTAATGCGGGGTCTCTCTCAGGCAGAAGATCAACCGATGTACGATGTTGGACCTAATGAGAGGTCCTTCTCTGTCAGGGTTTATAGGTCAACTG

Sinapis LR1-1 (4689) AGATCAGCGACATCCGTTTTCCAAGGACTAGCGAAGCAACCGTAAATCTGATACTTTGCTATAGTTTGCTACTTTTTCTGGGTATCGAGGAAGTATTCGA

Sinapis LR1-2 (4689) AGATCAGCGACATCCGTTTTCCAAGGACTAGCGAAGCAACCGTAAATCTGATACTTTGCTATAGTTTGCTACTTTTTCTGGGTATCGAGGAAGTATTCGA

B. nigra LR1-1 (3561) AGATCAGCGACATCCGTTTTCCAAGGACTAGCGAAGCAACCGTAAATCTGATACTTTGCTATAGTTTGCTACTTTTTCTGGGTATCGAGGAAGTATTCGA

B. nigra LR1-2 (3564) AGATCAGCGACATCCGTTTTCCAAGGACTAGCGAAGCAACCGTAAATCTGATACTTTGCTATAGTTTGCTACTTTTTCTGGGTATCGAGGAAGTATTCGA

B. carinata LR1-2 (3560) AGATCAGCGACATCCGTTTTCCAAGGACTAGCGAAGCAACCGTAAATCTGATACTTTGCTATAGTTTGCTACTTTTTCTGGGTATCGAGGAAGTATTCGA

B. carinata LR1-1 (3560) AGATCAGCGACATCCGTTTTCCAAGGACTAGCGAAGCAACCGTAAATCTGATACTTTGCTATAGTTTGCTACTTTTTCTGGGTATCGAGGAAGTATTCGA

B_rapa LRh1a (1622) ----------------------------------------------------------------------------------------------------

B_juncea LRh1a (1623) ----------------------------------------------------------------------------------------------------

B_napus LRh1a (1623) ----------------------------------------------------------------------------------------------------

B_oleracea LRh1a (1584) ----------------------------------------------------------------------------------------------------

4801 4900

Raphanus LR1-1 (3629) GTTGCTTCGCTAGAGTAGGACCTAACCCATGTACTGTGAGTGTTGATTAGTCACCCTGATATCGAGTGAGCATTCGGGGGTGTAGACTTCACACTTTAAC

Raphanus LR1-2 (3629) GTTGCTTCGCTAGAGTAGGACCTAACCCATGTACTGTGAGTGTTGATTAGTCACCCTGATATCGAGTGAGCATTCGGGGGTGTAGACTTCACACTTTAAC

Sinapis LR1-1 (4789) AGTCTGCCTTGGTTCAGCACACTATTCCGCGCATCTCCCACTCGCTTACTGGCAGAAGGTCTGCAAGCCTAGCCCCTTCTCTTTATCGAGGGCAACTCAT

Sinapis LR1-2 (4789) AGTCTGCCTTGGTTCAGCACACTATTCCGCGCATCTCCCACTCGCTTACTGGCAGAAGGTCTGCAAGCCTAGCCCCTTCTCTTTATCGAGGGCAACTCAT

B. nigra LR1-1 (3661) AGTCTGCCTTGGTTCAGCACACTATTCCGCGCATCTCCCACTCGCTTACTGGCAGAAGGTCTGCAAGCCTAGCCCCTTCTCTTTATCGAGGGCAACTCAT

B. nigra LR1-2 (3664) AGTCTGCCTTGGTTCAGCACACTATTCCGCGCATCTCCCACTCGCTTACTGGCAGAAGGTCTGCAAGCCTAGCCCCTTCTCTTTATCGAGGGCAACTCAT

B. carinata LR1-2 (3660) AGTCTGCCTTGGTTCAGCACACTATTCCGCGCATCTCCCACTCGCTTACTGGCAGAAGGTCTGCAAGCCTAGCCCCTTCTCTTTATCGAGGGCAACTCAT

B. carinata LR1-1 (3660) AGTCTGCCTTGGTTCAGCACACTATTCCGCGCATCTCCCACTCGCTTACTGGCAGAAGGTCTGCAAGCCTAGCCCCTTCTCTTTATCGAGGGCAACTCAT

B_rapa LRh1a (1622) ----------------------------------------------------------------------------------------------------

B_juncea LRh1a (1623) ----------------------------------------------------------------------------------------------------

B_napus LRh1a (1623) ----------------------------------------------------------------------------------------------------

B_oleracea LRh1a (1584) ----------------------------------------------------------------------------------------------------

4901 5000

Raphanus LR1-1 (3729) AGGTCATCTGTCTTTCGAAGTTTTCTGTAACACAGAGATGTAGTTGCAAGGCAAAGGTCAACTAGCTTGCTTCGCTAGGTTGCTTCGCTAGGGACTTAAG

Raphanus LR1-2 (3729) AGGTCATCTGTCTTTCGAAGTTTTCTGTAACACAGAGATGTAGTTGCAAGGCAAAGGTCAACTAGCTTGCTTCGCTAGGTTGCTTCGCTAGGGACTTAAG

Sinapis LR1-1 (4889) GCTTATAGGGCACTCCCGGGATGGAACCAGCGATAATTACTTCCACTCAAAGGGATCGGATTATGAACCACTCCTAGCTGCTTTCTTTCAAACCTTTCCA

Sinapis LR1-2 (4889) GCTTATAGGGCACTCCCGGGATGGAACCAGCGATAATTACTTCCACTCAAAGGGATCGGATTATGAACCACTCCTAGCTGCTTTCTTTCAAACCTTTCCA

B. nigra LR1-1 (3761) GCTTATAGGGCACTCCCGGGATGGAACCAGCGATAATTACTTCCACTCAAAGGGATCGGATTATGAACCACTCCTAGCTGCTTTCTTTCAAACCTTTCCA

B. nigra LR1-2 (3764) GCTTATAGGGCACTCCCGGGATGGAACCAGCGATAATTACTTCCACTCAAAGGGATCGGATTATGAACCACTCCTAGCTGCTTTCTTTCAAACCTTTCCA

B. carinata LR1-2 (3760) GCTTATAGGGCACTCCCGGGATGGAACCAGCGATAATTACTTCCACTCAAAGGGATCGGATTATGAACCACTCCTAGCTGCTTTCTTTCAAACCTTTCCA

B. carinata LR1-1 (3760) GCTTATAGGGCACTCCCGGGATGGAACCAGCGATAATTACTTCCACTCAAAGGGATCGGATTATGAACCACTCCTAGCTGCTTTCTTTCAAACCTTTCCA

B_rapa LRh1a (1622) ----------------------------------------------------------------------------------------------------

B_juncea LRh1a (1623) ----------------------------------------------------------------------------------------------------

B_napus LRh1a (1623) ----------------------------------------------------------------------------------------------------

B_oleracea LRh1a (1584) ----------------------------------------------------------------------------------------------------

5001 5100

Raphanus LR1-1 (3829) GAGAAGTGATTTTCTGTAGCACAGAGATGACTTTAGTAAGTTGCAAGGCGAAGGCCTCAACGATTGTGGTTAATCTATCTTGGTATCTTTGTGATGAGGT

Raphanus LR1-2 (3829) GAGAAGTGATTTTCTGTAGCACAGAGATGACTTTAGTAAGTTGCAAGGCGAAGGCCTCAACGATTGTGGTTAATCTATCTTGGTATCTTTGTGATGAGGT

Sinapis LR1-1 (4989) TCTGAAGTTGATTCTATAGGTGCAGTTGCAGTTCTAGCTCTTTCTTTAGTTGCTGGAGATGTAATACGACTAGCATCAAGCCTTCCTTCTTCAGTAATAG

Sinapis LR1-2 (4989) TCTGAAGTTGATTCTATAGGTGCAGTTGCAGTTCTAGCTCTTTCTTTAGTTGCTGGAGATGTAATACGACTAGCATCAAGCCTTCCTTCTTCAGTAATAG

B. nigra LR1-1 (3861) TCTGAAGTTGATTCTATAGGTGCAGTTGCAGTTCTAGCTCTTTCTTTAGTTGCTGGAGATGTAATACGACTAGCATCAAGCCTTCCTTCTTCAGTAATAG

B. nigra LR1-2 (3864) TCTGAAGTTGATTCTATAGGTGCAGTTGCAGTTCTAGCTCTTTCTTTAGTTGCTGGAGATGTAATACGACTAGCATCAAGCCTTCCTTCTTCAGTAATAG

B. carinata LR1-2 (3860) TCTGAAGTTGATTCTATAGGTGCAGTTGCAGTTCTAGCTCTTTCTTTAGTTGCTGGAGATGTAATACGACTAGCATCAAGCCTTCCTTCTTCAGTAATAG

B. carinata LR1-1 (3860) TCTGAAGTTGATTCTATAGGTGCAGTTGCAGTTCTAGCTCTTTCTTTAGTTGCTGGAGATGTAATACGACTAGCATCAAGCCTTCCTTCTTCAGTAATAG

B_rapa LRh1a (1622) ----------------------------------------------------------------------------------------------------

B_juncea LRh1a (1623) ----------------------------------------------------------------------------------------------------

B_napus LRh1a (1623) ----------------------------------------------------------------------------------------------------

B_oleracea LRh1a (1584) ----------------------------------------------------------------------------------------------------

5101 5200

Raphanus LR1-1 (3929) ATGGCTTATCTGTGCTGGGGTGTGCTTGGGAGTCAAATGCTAGGGTCATGCGAAAAGTCCTATTTCCAATTCCGATCTCATATCTAAGGAACGGGAGTTC

Raphanus LR1-2 (3929) ATGGCTTATCTGTGCTGGGGTGTGCTTGGGAGTCAAATGCTAGGGTCATGCGAAAAGTCCTATTTCCAATTCCGATCTCATATCTAAGGAACGGGAGTTC

Sinapis LR1-1 (5089) TTCCAGTGGAGGAAGAAGAAGAGCAGATCGCTTTAGACTGCCTCCCTTACTAAACAAGATAGGCTCGCTTCATCTGAGCCGTCGCCCCTTTCAATAGGTG

Sinapis LR1-2 (5089) TTCCAGTGGAGGAAGAAGAAGAGCAGATCGCTTTAGACTGCCTCCCTTACTAAACAAGATAGGCTCGCTTCATCTGAGCCGTCGCCCCTTTCAATAGGTG

B. nigra LR1-1 (3961) TTCCAGTGGAGGAAGAAGAAGAGCAGATCGCTTTAGACTGCCTCCCTTACTAAACAAGATAGGCTCGCTTCATCTGAGCCGTCGCCCCTTTCAATAGGTG

B. nigra LR1-2 (3964) TTCCAGTGGAGGAAGAAGAAGAGCAGATCGCTTTAGACTGCCTCCCTTACTAAACAAGATAGGCTCGCTTCATCTGAGCCGTCGCCCCTTTCAATAGGTG

B. carinata LR1-2 (3960) TTCCAGTGGAGGAAGAAGAAGAGCAGATCGCTTTAGACTGCCTCCCTTACTAAACAAGATAGGCTCGCTTCATCTGAGCCGTCGCCCCTTTCAATAGGTG

B. carinata LR1-1 (3960) TTCCAGTGGAGGAAGAAGAAGAGCAGATCGCTTTAGACTGCCTCCCTTACTAAACAAGATAGGCTCGCTTCATCTGAGCCGTCGCCCCTTTCAATAGGTG

B_rapa LRh1a (1622) ----------------------------------------------------------------------------------------------------

B_juncea LRh1a (1623) ----------------------------------------------------------------------------------------------------

B_napus LRh1a (1623) ----------------------------------------------------------------------------------------------------

B_oleracea LRh1a (1584) ----------------------------------------------------------------------------------------------------

5201 5300

Raphanus LR1-1 (4029) TTAACAGAAGAAAGGCCATAGACTCCGTTTGGTACGTATCTGATATGTGACAAATCCTAAATCTGCAAGGTATCTTATCTCTCTCAGTTATTAATATGGT

Raphanus LR1-2 (4029) TTAACAGAAGAAAGGCCATAGACTCCGTTTGGTACGTATCTGATATGTGACAAATCCTAAATCTGCAAGGTATCTTATCTCTCTCAGTTATTAATATGGT

Sinapis LR1-1 (5189) TAGGCATCGGGCCGATTCTCCTTTGCCTATCTTCCTGCTCTGCCAGTATACCTCCTTGCAAACCTCCCTTCCCTTAGCTTTCAATCTGTCTTGTGCCACT

Sinapis LR1-2 (5189) TAGGCATCGGGCCGATTCTCCTTTGCCTATCTTCCTGCTCTGCCAGTATACCTCCTTGCAAACCTCCCTTCCCTTAGCTTTCAATCTGTCTTGTGCCACT

B. nigra LR1-1 (4061) TAGGCATCGGGCCGATTCTCCTTTGCCTATCTTCCTGCTCTGCCAGTATACCTCCTTGCAAACCTCCCTTCCCTTAGCTTTCAATCTGTCTTGTGCCACT

B. nigra LR1-2 (4064) TAGGCATCGGGCCGATTCTCCTTTGCCTATCTTCCTGCTCTGCCAGTATACCTCCTTGCAAACCTCCCTTCCCTTAGCTTTCAATCTGTCTTGTGCCACT

B. carinata LR1-2 (4060) TAGGCATCGGGCCGATTCTCCTTTGCCTATCTTCCTGCTCTGCCAGTATACCTCCTTGCAAACCTCCCTTCCCTTAGCTTTCAATCTGTCTTGTGCCACT

B. carinata LR1-1 (4060) TAGGCATCGGGCCGATTCTCCTTTGCCTATCTTCCTGCTCTGCCAGTATACCTCCTTGCAAACCTCCCTTCCCTTAGCTTTCAATCTGTCTTGTGCCACT

B_rapa LRh1a (1622) ----------------------------------------------------------------------------------------------------

B_juncea LRh1a (1623) ----------------------------------------------------------------------------------------------------

B_napus LRh1a (1623) ----------------------------------------------------------------------------------------------------

B_oleracea LRh1a (1584) ----------------------------------------------------------------------------------------------------

5301 5400

Raphanus LR1-1 (4129) GCTGGACTAGCGAAGCAACCCTTTTGAAGAAGGAATCTTAGGAGTTCTGCAGCATATGGATGGCTTAAAGGAAGAAATCAGACATCTGAGATAAGCAGGG

Raphanus LR1-2 (4129) GCTGGACTAGCGAAGCAACCCTTTTGAAGAAGGAATCTTAGGAGTTCTGCAGCATATGGATGGCTTAAAGGAAGAAATCAGACATCTGAGATAAGCAGGG

Sinapis LR1-1 (5289) CCAGCTTTCACTCAAGCCATTCTTTGAACATACTTTATAGGGGCGACCTTCACTCTTCTTCTCGCTTCCTAACCCTAAAAGCTCACTTCTTTTGGTGTTG

Sinapis LR1-2 (5289) CCAGCTTTCACTCAAGCCATTCTTTGAACATACTTTATAGGGGCGACCTTCACTCTTCTTCTCGCTTCCTAACCCTAAAAGCTCACTTCTTTTGGTGTTG

B. nigra LR1-1 (4161) CCAGCTTTCACTCAAGCCATTCTTTGAACATACTTTATAGGGGCGACCTTCACTCTTCTTCTCGCTTCCTAACCCTAAAAGCTCACTTCTTTTGGTGTTG

B. nigra LR1-2 (4164) CCAGCTTTCACTCAAGCCATTCTTTGAACATACTTTATAGGGGCGACCTTCACTCTTCTTCTCGCTTCCTAACCCTAAAAGCTCACTTCTTTTGGTGTTG

B. carinata LR1-2 (4160) CCAGCTTTCACTCAAGCCATTCTTTGAACATACTTTATAGGGGCGACCTTCACTCTTCTTCTCGCTTCCTAACCCTAAAAGCTCACTTCTTTTGGTGTTG

B. carinata LR1-1 (4160) CCAGCTTTCACTCAAGCCATTCTTTGAACATACTTTATAGGGGCGACCTTCACTCTTCTTCTCGCTTCCTAACCCTAAAAGCTCACTTCTTTTGGTGTTG

B_rapa LRh1a (1622) ----------------------------------------------------------------------------------------------------

B_juncea LRh1a (1623) ----------------------------------------------------------------------------------------------------

B_napus LRh1a (1623) ----------------------------------------------------------------------------------------------------

B_oleracea LRh1a (1584) ----------------------------------------------------------------------------------------------------

5401 5500

Raphanus LR1-1 (4229) CTGTTGTCTAATCTGAGGAATGCATACGAATCCTATAGTAAGTTCACGGGTAATTCTCCGCTTAGTTCAGTAATCTCCTGAAAGTTGGGTGAGCTATTCT

Raphanus LR1-2 (4229) CTGTTGTCTAATCTGAGGAATGCATACGAATCCTATAGTAAGTTCACGGGTAATTCTCCGCTTAGTTCAGTAATCTCCTGAAAGTTGGGTGAGCTATTCT

Sinapis LR1-1 (5389) CTCCACGATCTTAAAGTGGAACTACGAGATAAATAAGCGGCGGGCTGATCTGACCTGCGCGTCTGCCTTCCTTTCGTCACTACGACTTGGTTTCGAAAGA

Sinapis LR1-2 (5389) CTCCACGATCTTAAAGTGGAACTACGAGATAAATAAGCGGCGGGCTGATCTGACCTGCGCGTCTGCCTTCCTTTCGTCACTACGACTTGGTTTCGAAAGA

B. nigra LR1-1 (4261) CTCCACGATCTTAAAGTGGAACTACGAGATAAATAAGCGGCGGGCTGATCTGACCTGCGCGTCTGCCTTCCTTTCGTCACTACGACTTGGTTTCGAAAGA

B. nigra LR1-2 (4264) CTCCACGATCTTAAAGTGGAACTACGAGATAAATAAGCGGCGGGCTGATCTGACCTGCGCGTCTGCCTTCCTTTCGTCACTACGACTTGGTTTCGAAAGA

B. carinata LR1-2 (4260) CTCCACGATCTTAAAGTGGAACTACGAGATAAATAAGCGGCGGGCTGATCTGACCTGCGCGTCTGCCTTCCTTTCGTCACTACGACTTGGTTTCGAAAGA

B. carinata LR1-1 (4260) CTCCACGATCTTAAAGTGGAACTACGAGATAAATAAGCGGCGGGCTGATCTGACCTGCGCGTCTGCCTTCCTTTCGTCACTACGACTTGGTTTCGAAAGA

B_rapa LRh1a (1622) ----------------------------------------------------------------------------------------------------

B_juncea LRh1a (1623) ----------------------------------------------------------------------------------------------------

B_napus LRh1a (1623) ----------------------------------------------------------------------------------------------------

B_oleracea LRh1a (1584) ----------------------------------------------------------------------------------------------------

5501 5600

Raphanus LR1-1 (4329) GTTTTCCGAGGTACCAACACTTTCAACCACTTTATTTCCGAGGTCCTAAACCTTAAACCAGTTTTTAAACGCGATTAAACGCAGATCAGCGACATCCGTT

Raphanus LR1-2 (4329) GTTTTCCGAGGTACCAACACTTTCAACCACTTTATTTCCGAGGTCCTAAACCTTAAACCAGTTTTTAAACGCGATTAAACGCAGATCAGCGACATCCGTT

Sinapis LR1-1 (5489) AGGAATGAGCGCTAGCCTAGCTAACTAGCATACCTTTCCTTGCCTCTTGCTCCGTAAAATGCTATCACATTTTGATTCCAATCATCTCATCTTTGTCCCG

Sinapis LR1-2 (5489) AGGAATGAGCGCTAGCCTAGCTAACTAGCATACCTTTCCTTGCCTCTTGCTCCGTAAAATGCTATCACATTTTGATTCCAATCATCTCATCTTTGTCCCG

B. nigra LR1-1 (4361) AGGAATGAGCGCTAGCCTAGCTAACTAGCATACCTTTCCTTGCCTCTTGCTCCGTAAAATGCTATCACATTTTGATTCCAATCATCTCATCTTTGTCCCG

B. nigra LR1-2 (4364) AGGAATGAGCGCTAGCCTAGCTAACTAGCATACCTTTCCTTGCCTCTTGCTCCGTAAAATGCTATCACATTTTGATTCCAATCATCTCATCTTTGTCCCG

B. carinata LR1-2 (4360) AGGAATGAGCGCTAGCCTAGCTAACTAGCATACCTTTCCTTGCCTCTTGCTCCGTAAAATGCTATCACATTTTGATTCCAATCATCTCATCTTTGTCCCG

B. carinata LR1-1 (4360) AGGAATGAGCGCTAGCCTAGCTAACTAGCATACCTTTCCTTGCCTCTTGCTCCGTAAAATGCTATCACATTTTGATTCCAATCATCTCATCTTTGTCCCG

B_rapa LRh1a (1622) ----------------------------------------------------------------------------------------------------

B_juncea LRh1a (1623) ----------------------------------------------------------------------------------------------------

B_napus LRh1a (1623) ----------------------------------------------------------------------------------------------------

B_oleracea LRh1a (1584) ----------------------------------------------------------------------------------------------------

5601 5700

Raphanus LR1-1 (4429) TTCCAAGGACTAGCGAAGCAACCGTAAATCTGATACTTTGCTATAGTTTGCTACTTTTTCTGGGTATCGAGGAAGTATTCGAAGTCTGCCTTGGTTCAGC

Raphanus LR1-2 (4429) TTCCAAGGACTAGCGAAGCAACCGTAAATCTGATACTTTGCTATAGTTTGCTACTTTTTCTGGGTATCGAGGAAGTATTCGAAGTCTGCCTTGGTTCAGC

Sinapis LR1-1 (5589) TTGAGAAGTTTAGTGGATGAACACTAGAATTGAGTTGCATGAAATACCTGGCAATTCTTGAGATAGGGCTCATCAGACTTTCTTAGTGAGAGTCCCAGTG

Sinapis LR1-2 (5589) TTGAGAAGTTTAGTGGATGAACACTAGAATTGAGTTGCATGAAATACCTGGCAATTCTTGAGATAGGGCTCATCAGACTTTCTTAGTGAGAGTCCCAGTG

B. nigra LR1-1 (4461) TTGAGAAGTTTAGTGGATGAACACTAGAATTGAGTTGCATGAAATACCTGGCAATTCTTGAGATAGGGCTCATCAGACTTTCTTAGTGAGAGTCCCAGTG

B. nigra LR1-2 (4464) TTGAGAAGTTTAGTGGATGAACACTAGAATTGAGTTGCATGAAATACCTGGCAATTCTTGAGATAGGGCTCATCAGACTTTCTTAGTGAGAGTCCCAGTG

B. carinata LR1-2 (4460) TTGAGAAGTTTAGTGGATGAACACTAGAATTGAGTTGCATGAAATACCTGGCAATTCTTGAGATAGGGCTCATCAGACTTTCTTAGTGAGAGTCCCAGTG

B. carinata LR1-1 (4460) TTGAGAAGTTTAGTGGATGAACACTAGAATTGAGTTGCATGAAATACCTGGCAATTCTTGAGATAGGGCTCATCAGACTTTCTTAGTGAGAGTCCCAGTG

B_rapa LRh1a (1622) ----------------------------------------------------------------------------------------------------

B_juncea LRh1a (1623) ----------------------------------------------------------------------------------------------------

B_napus LRh1a (1623) ----------------------------------------------------------------------------------------------------

B_oleracea LRh1a (1584) ----------------------------------------------------------------------------------------------------

5701 5800

Raphanus LR1-1 (4529) ACACTATTCCGCGCATCTCCCACTCGCTTACTGGCAGAAGGTCTGCAAGCCTAGCCCCTTCTCTTTATCGAGGGCAACTCATGCTTATAGGGCACTCCCG

Raphanus LR1-2 (4529) ACACTATTCCGCGCATCTCCCACTCGCTTACTGGCAGAAGGTCTGCAAGCCTAGCCCCTTCTCTTTATCGAGGGCAACTCATGCTTATAGGGCACTCCCG

Sinapis LR1-1 (5689) GTACAGACTATGTCAAAGCTGATCTTTGAAGTACGATCGGAGGAGATACCCGGCAGTGAAAGCTTTCCTCTCCTTTTAGTCGAGTTACGTCAGTACCTCT

Sinapis LR1-2 (5689) GTACAGACTATGTCAAAGCTGATCTTTGAAGTACGATCGGAGGAGATACCCGGCAGTGAAAGCTTTCCTCTCCTTTTAGTCGAGTTACGTCAGTACCTCT

B. nigra LR1-1 (4561) GTACAGACTATGTCAAAGCTGATCTTTGAAGTACGATCGGAGGAGATACCCGGCAGTGAAAGCTTTCCTCTCCTTTTAGTCGAGTTACGTCAGTACCTCT

B. nigra LR1-2 (4564) GTACAGACTATGTCAAAGCTGATCTTTGAAGTACGATCGGAGGAGATACCCGGCAGTGAAAGCTTTCCTCTCCTTTTAGTCGAGTTACGTCAGTACCTCT

B. carinata LR1-2 (4560) GTACAGACTATGTCAAAGCTGATCTTTGAAGTACGATCGGAGGAGATACCCGGCAGTGAAAGCTTTCCTCTCCTTTTAGTCGAGTTACGTCAGTACCTCT

B. carinata LR1-1 (4560) GTACAGACTATGTCAAAGCTGATCTTTGAAGTACGATCGGAGGAGATACCCGGCAGTGAAAGCTTTCCTCTCCTTTTAGTCGAGTTACGTCAGTACCTCT

B_rapa LRh1a (1622) ----------------------------------------------------------------------------------------------------

B_juncea LRh1a (1623) ----------------------------------------------------------------------------------------------------

B_napus LRh1a (1623) ----------------------------------------------------------------------------------------------------

B_oleracea LRh1a (1584) ----------------------------------------------------------------------------------------------------

5801 5900

Raphanus LR1-1 (4629) GGATGGAACCAGCGATAATTACTTCCACTCAAAGGGATCGGATTATGAACCACTCCTAGCTGCTTTCTTTCAAACCTTTCCATCTGAAGTTGATTCTATA

Raphanus LR1-2 (4629) GGATGGAACCAGCGATAATTACTTCCACTCAAAGGGATCGGATTATGAACCACTCCTAGCTGCTTTCTTTCAAACCTTTCCATCTGAAGTTGATTCTATA

Sinapis LR1-1 (5789) CGCAATAAATGCTCGAGTTCCCTCTTTTAAAAGAGTAATCAATTACCTTGGACCCTATCCTCTCTGATAGATGATCTTGCTTGGGCCACTGAAGAAGAAG

Sinapis LR1-2 (5789) CGCAATAAATGCTCGAGTTCCCTCTTTTAAAAGAGTAATCAATTACCTTGGACCCTATCCTCTCTGATAGATGATCTTGCTTGGGCCACTGAAGAAGAAG

B. nigra LR1-1 (4661) CGCAATAAATGCTCGAGTTCCCTCTTTTAAAAGAGTAATAAATTACCTTGGACCCTATCCTCTCTGATAGATGATCTTGCTTGGGCCACTGAAGAAGAAG

B. nigra LR1-2 (4664) CGCAATAAATGCTCGAGTTCCCTCTTTTAAAAGAGTAATAAATTACCTTGGACCCTATCCTCTCTGATAGATGATCTTGCTTGGGCCACTGAAGAAGAAG

B. carinata LR1-2 (4660) CGCAATAAATGCTCGAGTTCCCTCTTTTAAAAGAGTAATAAATTACCTTGGACCCTATCCTCTCTGATAGATGATCTTGCTTGGGCCACTGAAGAAGAAG

B. carinata LR1-1 (4660) CGCAATAAATGCTCGAGTTCCCTCTTTTAAAAGAGTAATAAATTACCTTGGACCCTATCCTCTCTGATAGATGATCTTGCTTGGGCCACTGAAGAAGAAG

B_rapa LRh1a (1622) ----------------------------------------------------------------------------------------------------

B_juncea LRh1a (1623) ----------------------------------------------------------------------------------------------------

B_napus LRh1a (1623) ----------------------------------------------------------------------------------------------------

B_oleracea LRh1a (1584) ----------------------------------------------------------------------------------------------------

5901 6000

Raphanus LR1-1 (4729) GGTGCAGTTGCAGTTCTAGCTCTTTCTTTAGTTGCTGGAGATGTAATACGACTAGCATCAAGCCTTCCTTCTTCAGTAATAGTTCCAGTGGAGGAAGAAG

Raphanus LR1-2 (4729) GGTGCAGTTGCAGTTCTAGCTCTTTCTTTAGTTGCTGGAGATGTAATACGACTAGCATCAAGCCTTCCTTCTTCAGTAATAGTTCCAGTGGAGGAAGAAG

Sinapis LR1-1 (5889) AATATTGAGGAATTGGACTTAGCATTCTATCTAATGCTTTGATCCATCTAAGCCCATTGACAAGCAGGAAGAGGAGAGGGGGCTTTTGGGATAATTATGA

Sinapis LR1-2 (5889) AATATTGAGGAATTGGACTTAGCATTCTATCTAATGCTTTGATCCATCTAAGCCCATTGACAAGCAGGAAGAGGAGAGGGGGCTTTTGGGATAATTATGA

B. nigra LR1-1 (4761) AATATTGAGGAATTGGACTTAGCATTCTATCTAATGCTTTGATCCATCTAAGCCCATTGACAAGCAGGAAGAGGAGAGGGGGCTTTTGGGATAATTATGA

B. nigra LR1-2 (4764) AATATTGAGGAATTGGACTTAGCATTCTATCTAATGCTTTGATCCATCTAAGCCCATTGACAAGCAGGAAGAGGAGAGGGGGCTTTTGGGATAATTATGA

B. carinata LR1-2 (4760) AATATTGAGGAATTGGACTTAGCATTCTATCTAATGCTTTGATCCATCTAAGCCCATTGACAAGCAGGAAGAGGAGAGGGGGCTTTTGGGATAATTATGA

B. carinata LR1-1 (4760) AATATTGAGGAATTGGACTTAGCATTCTATCTAATGCTTTGATCCATCTAAGCCCATTGACAAGCAGGAAGAGGAGAGGGGGCTTTTGGGATAATTATGA

B_rapa LRh1a (1622) ----------------------------------------------------------------------------------------------------

B_juncea LRh1a (1623) ----------------------------------------------------------------------------------------------------

B_napus LRh1a (1623) ----------------------------------------------------------------------------------------------------

B_oleracea LRh1a (1584) ----------------------------------------------------------------------------------------------------

6001 6100

Raphanus LR1-1 (4829) AAGAGCAGATCGCTTTAGACTGCCTCCCTTACTAAACAAGATAGGCTCGCTTCATCTGAGCCGTCGCCCCTTTCAATAGGTGTAGGCATCGGGCCGATTC

Raphanus LR1-2 (4829) AAGAGCAGATCGCTTTAGACTGCCTCCCTTACTAAACAAGATAGGCTCGCTTCATCTGAGCCGTCGCCCCTTTCAATAGGTGTAGGCATCGGGCCGATTC

Sinapis LR1-1 (5989) TACTGAGCCCAATGGAAAAGCCCACGCCCGAGTCCAAAATGGAATTACTGGGGAAACGAATCCAAGAAAGCCCAAAAACAAAAGTGTGGAGAAGGGGACT

Sinapis LR1-2 (5989) TACTGAGCCCAATGGAAAAGCCCACGCCCGAGTCCAAAATGGAATTACTGGGGAAACGAATCCAAGAAAGCCCAAAAACAAAAGTGTGGAGAAGGGGACT

B. nigra LR1-1 (4861) TACTGAGCCCAATGGAAAAGCCCACGCCCGAGTCCAAAATGGAATTACTGGGGAAACGAATCCAAGAAAGCCCAAAAACAAAAGTGTGGAGAAGGGGACT

B. nigra LR1-2 (4864) TACTGAGCCCAATGGAAAAGCCCACGCCCGAGTCCAAAATGGAATTACTGGGGAAACGAATCCAAGAAAGCCCAAAAACAAAAGTGTGGAGAAGGGGACT

B. carinata LR1-2 (4860) TACTGAGCCCAATGGAAAAGCCCACGCCCGAGTCCAAAATGGAATTACTGGGGAAACGAATCCAAGAAAGCCCAAAAACAAAAGTGTGGAGAAGGGGACT

B. carinata LR1-1 (4860) TACTGAGCCCAATGGAAAAGCCCACGCCCGAGTCCAAAATGGAATTACTGGGGAAACGAATCCAAGAAAGCCCAAAAACAAAAGTGTGGAGAAGGGGACT

B_rapa LRh1a (1622) ----------------------------------------------------------------------------------------------------

B_juncea LRh1a (1623) ----------------------------------------------------------------------------------------------------

B_napus LRh1a (1623) ----------------------------------------------------------------------------------------------------

B_oleracea LRh1a (1584) ----------------------------------------------------------------------------------------------------

6101 6200

Raphanus LR1-1 (4929) TCCTTTGCCTATCTTCCTGCTCTGCCAGTATACCTCCTTGCAAACCTCCCTTCCCTTAGCTTTCAATCTGTCTTGTGCCACTCCAGCTTTCACTCAAGCC

Raphanus LR1-2 (4929) TCCTTTGCCTATCTTCCTGCTCTGCCAGTATACCTCCTTGCAAACCTCCCTTCCCTTAGCTTTCAATCTGTCTTGTGCCACTCCAGCTTTCACTCAAGCC

Sinapis LR1-1 (6089) TATTGTACTGAAAAAGTTATTGTGCTCATTTACTCTATACGCGTCTTAGTGGACTGACAGAGTGAGCTGGAAAGGTTCCGTCTTTCCGGGGAAATTCAAG

Sinapis LR1-2 (6089) TATTGTACTGAAAAAGTTATTGTGCTCATTTACTCTATACGCGTCTTAGTGGACTGACAGAGTGAGCTGGAAAGGTTCCGTCTTTCCGGGGAAATTCAAG

B. nigra LR1-1 (4961) TATTGTACTGAAAAAGTTATTGTGCTCATTTACTCTATACGCGTCTTAGTGGACTGACAGAGTGAGCTGGAAAGGTTCCGTCTTTCCGGGGAAATTCAAG

B. nigra LR1-2 (4964) TATTGTACTGAAAAAGTTATTGTGCTCATTTACTCTATACGCGTCTTAGTGGACTGACAGAGTGAGCTGGAAAGGTTCCGTCTTTCCGGGGAAATTCAAG

B. carinata LR1-2 (4960) TATTGTACTGAAAAAGTTATTGTGCTCATTTACTCTATACGCGTCTTAGTGGACTGACAGAGTGAGCTGGAAAGGTTCCGTCTTTCCGGGGAAATTCAAG

B. carinata LR1-1 (4960) TATTGTACTGAAAAAGTTATTGTGCTCATTTACTCTATACGCGTCTTAGTGGACTGACAGAGTGAGCTGGAAAGGTTCCGTCTTTCCGGGGAAATTCAAG

B_rapa LRh1a (1622) ----------------------------------------------------------------------------------------------------

B_juncea LRh1a (1623) ----------------------------------------------------------------------------------------------------

B_napus LRh1a (1623) ----------------------------------------------------------------------------------------------------

B_oleracea LRh1a (1584) ----------------------------------------------------------------------------------------------------

6201 6300

Raphanus LR1-1 (5029) ATTCTTTGAACATACTTTATAGGGGCGACCTTCACTCTTCTTCTCGCTTCCTAACCCTAAAAGCTCACTTCTTTTGGTGTTGCTCCACGATCTTAAAGTG

Raphanus LR1-2 (5029) ATTCTTTGAACATACTTTATAGGGGCGACCTTCACTCTTCTTCTCGCTTCCTAACCCTAAAAGCTCACTTCTTTTGGTGTTGCTCCACGATCTTAAAGTG

Sinapis LR1-1 (6189) AGAGCTAGCTTCGGTGCTCACCAAAGGACGGAGCTGTCGAGTAAGGATTGGCCGAAGTCAGTTACCTGGGAATCAGCCAATAAAAAATAGACAAATAAAA

Sinapis LR1-2 (6189) AGAGCTAGCTTCGGTGCTCACCAAAGGACGGAGCTGTCGAGTAAGGATTGGCCGAAGTCAGTTACCTGGGAATCAGCCAATAAAAAATAGACAAATAAAA

B. nigra LR1-1 (5061) AGAGCTAGCTTCGGTGCTCACCAAAGGACGGAGCTGTCGAGTAAGGATTGGCCGAAGTCAGTTACCTGGGAATCAGCCAATAAAAAATAGACAAATAAAA

B. nigra LR1-2 (5064) AGAGCTAGCTTCGGTGCTCACCAAAGGACGGAGCTGTCGAGTAAGGATTGGCCGAAGTCAGTTACCTGGGAATCAGCCAATAAAAAATAGACAAATAAAA

B. carinata LR1-2 (5060) AGAGCTAGCTTCGGTGCTCACCAAAGGACGGAGCTGTCGAGTAAGGATTGGCCGAAGTCAGTTACCTGGGAATCAGCCAATAAAAAATAGACAAATAAAA

B. carinata LR1-1 (5060) AGAGCTAGCTTCGGTGCTCACCAAAGGACGGAGCTGTCGAGTAAGGATTGGCCGAAGTCAGTTACCTGGGAATCAGCCAATAAAAAATAGACAAATAAAA

B_rapa LRh1a (1622) ----------------------------------------------------------------------------------------------------

B_juncea LRh1a (1623) ----------------------------------------------------------------------------------------------------

B_napus LRh1a (1623) ----------------------------------------------------------------------------------------------------

B_oleracea LRh1a (1584) ----------------------------------------------------------------------------------------------------

6301 6400

Raphanus LR1-1 (5129) GAACTACGAGATAAATAAGCGGCGGGCTGATCTGACCTGCGCGTCTGCCTTCCTTTCGTCACTACGACTTGGTTTCGAAAGAAGGAATGAGCGCTAGCCT

Raphanus LR1-2 (5129) GAACTACGAGATAAATAAGCGGCGGGCTGATCTGACCTGCGCGTCTGCCTTCCTTTCGTCACTACGACTTGGTTTCGAAAGAAGGAATGAGCGCTAGCCT

Sinapis LR1-1 (6289) GCGTGATCTGAGTAGGCAGAGCTAAATAGTGCACGTAGGGTAAACGAGGACTCTGGTCAGCTTTGAGCTGTCGAGTAAGGAGTGACGGGCCTTTGGAAAC

Sinapis LR1-2 (6289) GCGTGATCTGAGTAGGCAGAGCTAAATAGTGCACGTAGGGTAAACGAGGACTCTGGTCAGCTTTGAGCTGTCGAGTAAGGAGTGACGGGCCTTTGGAAAC

B. nigra LR1-1 (5161) GCGTGATCTGAGTAGGCAGAGCTAAATAGTGCACGTAGGGTAAACGAGGACTCTGGTCAGCTTTGAGCTGTCGAGTAAGGAGTGACGGGCCTTTGGAAAC

B. nigra LR1-2 (5164) GCGTGATCTGAGTAGGCAGAGCTAAATAGTGCACGTAGGGTAAACGAGGACTCTGGTCAGCTTTGAGCTGTCGAGTAAGGAGTGACGGGCCTTTGGAAAC

B. carinata LR1-2 (5160) GCGTGATCTGAGTAGGCAGAGCTAAATAGTGCACGTAGGGTAAACGAGGACTCTGGTCAGCTTTGAGCTGTCGAGTAAGGAGTGACGGGCCTTTGGAAAC

B. carinata LR1-1 (5160) GCGTGATCTGAGTAGGCAGAGCTAAATAGTGCACGTAGGGTAAACGAGGACTCTGGTCAGCTTTGAGCTGTCGAGTAAGGAGTGACGGGCCTTTGGAAAC

B_rapa LRh1a (1622) ----------------------------------------------------------------------------------------------------

B_juncea LRh1a (1623) ----------------------------------------------------------------------------------------------------

B_napus LRh1a (1623) ----------------------------------------------------------------------------------------------------

B_oleracea LRh1a (1584) ----------------------------------------------------------------------------------------------------

6401 6500

Raphanus LR1-1 (5229) AGCTAACTAGCATACCTTTCCTTGCCTCTTGCTCCGTAAAATGCTATCACATTTTGATTCCAATCATCTCATCTTTGTCCCGTTGAGAAGTTTAGTGGAT

Raphanus LR1-2 (5229) AGCTAACTAGCATACCTTTCCTTGCCTCTTGCTCCGTAAAATGCTATCACATTTTGATTCCAATCATCTCATCTTTGTCCCGTTGAGAAGTTTAGTGGAT

Sinapis LR1-1 (6389) CCGAGAAAAGCGGGGGAGTACTCTATACAGTGCGTTCTATTATTGCCTCTTATTCCCGAGGGAGTGGTCGTAATTAAGCCGCGTGGCAATACCCGCCAAA

Sinapis LR1-2 (6389) CCGAGAAAAGCGGGGGAGTACTCTATACAGTGCGTTCTATTATTGCCTCTTATTCCCGAGGGAGTGGTCGTAATTAAGCCGCGTGGCAATACCCGCCAAA

B. nigra LR1-1 (5261) CCGAGAAAAGCGGGGGAGTACTCTATACAGTGCGTTCTATTATTGCCTCTTATTCCCGAGGGAGTGGTCGTAATTAAGCCGCGTGGCAATACCCGCCAAA

B. nigra LR1-2 (5264) CCGAGAAAAGCGGGGGAGTACTCTATACAGTGCGTTCTATTATTGCCTCTTATTCCCGAGGGAGTGGTCGTAATTAAGCCGCGTGGCAATACCCGCCAAA

B. carinata LR1-2 (5260) CCGAGAAAAGCGGGGGAGTACTCTATACAGTGCGTTCTATTATTGCCTCTTATTCCCGAGGGAGTGGTCGTAATTAAGCCGCGTGGCAATACCCGCCAAA

B. carinata LR1-1 (5260) CCGAGAAAAGCGGGGGAGTACTCTATACAGTGCGTTCTATTATTGCCTCTTATTCCCGAGGGAGTGGTCGTAATTAAGCCGCGTGGCAATACCCGCCAAA

B_rapa LRh1a (1622) ----------------------------------------------------------------------------------------------------

B_juncea LRh1a (1623) ----------------------------------------------------------------------------------------------------

B_napus LRh1a (1623) ----------------------------------------------------------------------------------------------------

B_oleracea LRh1a (1584) ----------------------------------------------------------------------------------------------------

6501 6600

Raphanus LR1-1 (5329) GAACACTAGAATTGAGTTGCATGAAATACCTGGCAATTCTTGAGATAGGGCTCATCAGACTTTCTTAGTGAGAGTCCCAGTGGTACAGACTATGTCAAAG

Raphanus LR1-2 (5329) GAACACTAGAATTGAGTTGCATGAAATACCTGGCAATTCTTGAGATAGGGCTCATCAGACTTTCTTAGTGAGAGTCCCAGTGGTACAGACTATGTCAAAG

Sinapis LR1-1 (6489) AAGGACTCTTTGATTTTGAGGGGCGGGGCCTTTATCCAGGGGAGAATTCTTCAGCGCACTAAAATCTAGTTAAGGGGGTTCCATATTCATGAAAAGCCGG

Sinapis LR1-2 (6489) AAGGACTCTTTGATTTTGAGGGGCGGGGCCTTTATCCAGGGGAGAATTCTTCAGCGCACTAAAATCTAGTTAAGGGGGTTCCATATTCATGAAAAGCCGG

B. nigra LR1-1 (5361) AAGGACTCTTTGATTTTGAGGGGCGGGGCCTTTATCCAGGGGAGAATTCTTCAGCGCACTAAAATCTAGTTAAGGGGGTTCCATATTCATGAAAAGCCGG

B. nigra LR1-2 (5364) AAGGACTCTTTGATTTTGAGGGGCGGGGCCTTTATCCAGGGGAGAATTCTTCAGCGCACTAAAATCTAGTTAAGGGGGTTCCATATTCATGAAAAGCCGG

B. carinata LR1-2 (5360) AAGGACTCTTTGATTTTGAGGGGCGGGGCCTTTATCCAGGGGAGAATTCTTCAGCGCACTAAAATCTAGTTAAGGGGGTTCCATATTCATGAAAAGCCGG

B. carinata LR1-1 (5360) AAGGACTCTTTGATTTTGAGGGGCGGGGCCTTTATCCAGGGGAGAATTCTTCAGCGCACTAAAATCTAGTTAAGGGGGTTCCATATTCATGAAAAGCCGG

B_rapa LRh1a (1622) ----------------------------------------------------------------------------------------------------

B_juncea LRh1a (1623) ----------------------------------------------------------------------------------------------------

B_napus LRh1a (1623) ----------------------------------------------------------------------------------------------------

B_oleracea LRh1a (1584) ----------------------------------------------------------------------------------------------------

6601 6700

Raphanus LR1-1 (5429) CTGATCTTTGAAGTACGATCGGAGGAGATACCCGGCAGTGAAAGCTTTCCTCTCCTTTTAGTCGAGTTACGTCAGTACCTCTCGCAATAAATGCTCGAGT

Raphanus LR1-2 (5429) CTGATCTTTGAAGTACGATCGGAGGAGATACCCGGCAGTGAAAGCTTTCCTCTCCTTTTAGTCGAGTTACGTCAGTACCTCTCGCAATAAATGCTCGAGT

Sinapis LR1-1 (6589) GGTTGAACCATGTTACGGAACTAAGACAAGAATTATGACTAATAAGAAAGGGTTTAGGGCCTGCCTATAAATAGAAGCTTCTTTCAGTCTCTATTTGGCA

Sinapis LR1-2 (6589) GGTTGAACCATGTTACGGAACTAAGACAAGAATTATGACTAATAAGAAAGGGTTTAGGGCCTGCCTATAAATAGAAGCTTCTTTCAGTCTCTATTTGGCA

B. nigra LR1-1 (5461) GGTTGAACCATGTTACGGAACTAAGACAAGAATTATGACTAATAAGAAAGGGTTTAGGGCCTGCCTATAAATAGAAGCTTCTTTCAGTCTCTATTTGGCA

B. nigra LR1-2 (5464) GGTTGAACCATGTTACGGAACTAAGACAAGAATTATGACTAATAAGAAAGGGTTTAGGGCCTGCCTATAAATAGAAGCTTCTTTCAGTCTCTATTTGGCA

B. carinata LR1-2 (5460) GGTTGAACCATGTTACGGAACTAAGACAAGAATTATGACTAATAAGAAAGGGTTTAGGGCCTGCCTATAAATAGAAGCTTCTTTCAGTCTCTATTTGGCA

B. carinata LR1-1 (5460) GGTTGAACCATGTTACGGAACTAAGACAAGAATTATGACTAATAAGAAAGGGTTTAGGGCCTGCCTATAAATAGAAGCTTCTTTCAGTCTCTATTTGGCA

B_rapa LRh1a (1622) ----------------------------------------------------------------------------------------------------

B_juncea LRh1a (1623) ----------------------------------------------------------------------------------------------------

B_napus LRh1a (1623) ----------------------------------------------------------------------------------------------------

B_oleracea LRh1a (1584) ----------------------------------------------------------------------------------------------------

6701 6800

Raphanus LR1-1 (5529) TCCCTCTTTTAAAAGAGTAATAAATTACCTTGGACCCTATCCTC-TCTGATAGATGATCTTGCTTGGGCCACTGAAGAAGAAGAATATTGAGGAATTGGA

Raphanus LR1-2 (5529) TCCCTCTTTTAAAAGAGTAATAAATTACCTTGGACCCTATCCTC-TCTGATAGATGATCTTGCTTGGGCCACTGAAGAAGAAGAATATTGAGGAATTGGA

Sinapis LR1-1 (6689) AAGAGGGCACTTAGAAGTCGGCAAGAAAGTGAGTAGACATGGATATCGCGAACAGACTGGCGAGCATTCAACAAGAAATACAAACCGTGGAAAACGAAAA

Sinapis LR1-2 (6689) AAGAGGGCACTTAGAAGTCGGCAAGAAAGTGAGTAGACATGGATATCGCGAACAGACTGGCGAGCATTCAACAAGAAATACAAACCGTGGAAAACGAAAA

B. nigra LR1-1 (5561) AAGAGGGCACTTAGAAGTCGGCAAGAAAGTGAGTAGACATGGAT-ACTTGAACAGACTGGCGAGCATTCAACAAGAAATACAAACCGTGGAAAACGAAAA

B. nigra LR1-2 (5564) AAGAGGGCACTTAGAAGTCGGCAAGAAAGTGAGTAGACATGGATATCGCGAACAGACTGGCGAGCATTCAACAAGAAATACAAACCGTGGAAAACGAAAA

B. carinata LR1-2 (5560) AAGAGGGCACTTAGAAGTCGGCAAGAAAGTGAGTAGACATGGATATCGCGAACAGACTGGCGAGCATTCAACAAGAAATACAAACCGTGGAAAACGAAAA

B. carinata LR1-1 (5560) AAGAGGGCACTTAGAAGTCGGCAAGAAAGTGAGTAGACATGGATATCGCGAACAGACTGGCGAGCATTCAACAAGAAATACAAACCGTGGAAAACGAAAA

B_rapa LRh1a (1622) ----------------------------------------------------------------------------------------------------

B_juncea LRh1a (1623) ----------------------------------------------------------------------------------------------------

B_napus LRh1a (1623) ----------------------------------------------------------------------------------------------------

B_oleracea LRh1a (1584) ----------------------------------------------------------------------------------------------------

6801 6900

Raphanus LR1-1 (5628) CTTAGCATTCTATCTAATGCTTTGATCCATCTAAGCCCATTGACAAGCAGGAAGAGGAGAGGGGGCTTTTGGGATAATTATGATACTGAGCCCAATGGAA

Raphanus LR1-2 (5628) CTTAGCATTCTATCTAATGCTTTGATCCATCTAAGCCCATTGACAAGCAGGAAGAGGAGAGGGGGCTTTTGGGATAATTATGATACTGAGCCCAATGGAA

Sinapis LR1-1 (6789) GCTCCAATGTGAGCAAATGCTTGGTCTGTTCTGGGAGCATCCGCCTGCTCTCGATCCGGAGGTCGTGGGCAGAAGGATGCAACTTTTACGGGACCGCATT

Sinapis LR1-2 (6789) GCTCCAATGTGAGCAAATGCTTGGTCTGTTCTGGGAGCATCCGCCTGCTCTCGATCCGGAGGTCGTGGGCAGAAGGATGCAACTTTTACGGGACCGCATT

B. nigra LR1-1 (5660) GCTCCAATGTGAGCAAATGCTTGGTCTGTTCTGGGAGCATCCGCCTGCTCTCGATCCGGAGGTCGTGGGCAGAAGGATGCAACTTTTACGGGACCGCATT

B. nigra LR1-2 (5664) GCTCCAATGTGAGCAAATGCTTGGTCTGTTCTGGGAGCATCCGCCTGCTCTCGATCCGGAGGTCGTGGGCAGAAGGATGCAACTTTTACGGGACCGCATT

B. carinata LR1-2 (5660) GCTCCAATGTGAGCAAATGCTTGGTCTGTTCTGGGAGCATCCGCCTGCTCTCGATCCGGAGGTCGTGGGCAGAAGGATGCAACTTTTACGGGACCGCATT

B. carinata LR1-1 (5660) GCTCCAATGTGAGCAAATGCTTGGTCTGTTCTGGGAGCATCCGCCTGCTCTCGATCCGGAGGTCGTGGGCAGAAGGATGCAACTTTTACGGGACCGCATT

B_rapa LRh1a (1622) ----------------------------------------------------------------------------------------------------

B_juncea LRh1a (1623) ----------------------------------------------------------------------------------------------------

B_napus LRh1a (1623) ----------------------------------------------------------------------------------------------------

B_oleracea LRh1a (1584) ----------------------------------------------------------------------------------------------------

6901 7000

Raphanus LR1-1 (5728) AAGCCCACGCCCGAGTCCAAAATGGAATTACTGGGGAAACGAATCCAAGAAAGCCCAAAAACAAAAGTGTGGAGAAGGGGACTTATTGTACTGAAAAAGT

Raphanus LR1-2 (5728) AAGCCCACGCCCGAGTCCAAAATGGAATTACTGGGGAAACGAATCCAAGAAAGCCCAAAAACAAAAGTGTGGAGAAGGGGACTTATTGTACTGAAAAAGT

Sinapis LR1-1 (6889) CGCGGTCTGAAACACAGGATTTCTTTTCTCCTGAAGGAGCAGGAAGGCCTAATAATACAGGCTGTCACCCACGGTCGCCGGGGAGACTAGAATAGAAGAG

Sinapis LR1-2 (6889) CGCGGTCTGAAACACAGGATTTCTTTTCTCCTGAAGGAGCAGGAAGGCCTAATAATACAGGCTGTCACCCACGGTCGCCGGGGAGACTAGAATAGAAGAG

B. nigra LR1-1 (5760) CGCGGTCTGAAACACAGGATTTCTTTTCTCCTGAAGGAGCAGGAAGGCCTAATAATACAGGCTGTCACCCACGGTCGCCGGGGAGACTAGAATAGAAGAG

B. nigra LR1-2 (5764) CGCGGTCTGAAACACAGGATTTCTTTTCTCCTGAAGGAGCAGGAAGGCCTAATAATACAGGCTGTCACCCACGGTCGCCGGGGAGACTAGAATAGAAGAG

B. carinata LR1-2 (5760) CGCGGTCTGAAACACAGGATTTCTTTTCTCCTGAAGGAGCAGGAAGGCCTAATAATACAGGCTGTCACCCACGGTCGCCGGGGAGACTAGAATAGAAGAG

B. carinata LR1-1 (5760) CGCGGTCTGAAACACAGGATTTCTTTTCTCCTGAAGGAGCAGGAAGGCCTAATAATACAGGCTGTCACCCACGGTCGCCGGGGAGACTAGAATAGAAGAG

B_rapa LRh1a (1622) ----------------------------------------------------------------------------------------------------

B_juncea LRh1a (1623) ----------------------------------------------------------------------------------------------------

B_napus LRh1a (1623) ----------------------------------------------------------------------------------------------------

B_oleracea LRh1a (1584) ----------------------------------------------------------------------------------------------------

7001 7100

Raphanus LR1-1 (5828) GATTGTGCTCATTTACTCTATACGCGTCTTAGTGGACTGACAGAGTGAGCTGGAAAGGTTCCGTCTTTCCGGGGAAATTCAAGAGAGCTAGCTTCGGTGC

Raphanus LR1-2 (5828) GATTGTGCTCATTTACTCTATACGCGTCTTAGTGGACTGACAGAGTGAGCTGGAAAGGTTCCGTCTTTCCGGGGAAATTCAAGAGAGCTAGCTTCGGTGC

Sinapis LR1-1 (6989) TCCGTCGACTCTTTCTTTCGATAAGATTGAAATAAGGAGTCCGTCGACCCAAAGTAATGTGTTTTAATGCATGGCTTTCTTTGTTATCTTTCATGTTGCT

Sinapis LR1-2 (6989) TCCGTCGACTCTTTCTTTCGATAAGATTGAAATAAGGAGTCCGTCGACCCAAAGTAATGTGTTTTAATGCATGGCTTTCTTTGTTATCTTTCATGTTGCT

B. nigra LR1-1 (5860) TCCGTCGACTCTTTCTTTCGATAAGATTGAAATAAGGAGTCCGTCGACCCAAAGTAATGTGTTTTAATGCATGGCTTTCTTTGTTATCTTTCATGTTGCT

B. nigra LR1-2 (5864) TCCGTCGACTCTTTCTTTCGATAAGATTGAAATAAGGAGTCCGTCGACCCAAAGTAATGTGTTTTAATGCATGGCTTTCTTTGTTATCTTTCATGTTGCT

B. carinata LR1-2 (5860) TCCGTCGACTCTTTCTTTCGATAAGATTGAAATAAGGAGTCCGTCGACCCAAAGTAATGTGTTTTAATGCATGGCTTTCTTTGTTATCTTTCATGTTGCT

B. carinata LR1-1 (5860) TCCGTCGACTCTTTCTTTCGATAAGATTGAAATAAGGAGTCCGTCGACCCAAAGTAATGTGTTTTAATGCATGGCTTTCTTTGTTATCTTTCATGTTGCT

B_rapa LRh1a (1622) ----------------------------------------------------------------------------------------------------

B_juncea LRh1a (1623) ----------------------------------------------------------------------------------------------------

B_napus LRh1a (1623) ----------------------------------------------------------------------------------------------------

B_oleracea LRh1a (1584) ----------------------------------------------------------------------------------------------------

7101 7200

Raphanus LR1-1 (5928) TCACCAAAGGACGGAGCTGTCGAGTAAGGATTGGCCGAAGTCAGTTACCTGGGAATCAGCCAATAAAAAATAGACAAATAAAAGCGTGATCTGAGTAGGC

Raphanus LR1-2 (5928) TCACCAAAGGACGGAGCTGTCGAGTAAGGATTGGCCGAAGTCAGTTACCTGGGAATCAGCCAATAAAAAATAGACAAATAAAAGCGTGATCTGAGTAGGC

Sinapis LR1-1 (7089) CTATGTCTTTGGTTTATGTACTATGTTCTTAGTTTCCTTTTTAATGGTGTGTGGCTGGTCTACGGTGTGTGTAGGCTTCCTATTTTATGTATGCTTGTAA

Sinapis LR1-2 (7089) CTATGTCTTTGGTTTATGTACTATGTTCTTAGTTTCCTTTTTAATGGTGTGTGGCTGGTCTACGGTGTGTGTAGGCTTCCTATTTTATGTATGCTTGTAA

B. nigra LR1-1 (5960) CTATGTCTTTGGTTTATGTACTATGTTCTTAGTTTCCTTTTTAATGGTGTGTGGCTGGTCTACGGTGTGTGTAGGCTTCCTATTTTATGTATGCTTGTAA

B. nigra LR1-2 (5964) CTATGTCTTTGGTTTATGTACTATGTTCTTAGTTTCCTTTTTAATGGTGTGTGGCTGGTCTACGGTGTGTGTAGGCTTCCTATTTTATGTATGCTTGTAA

B. carinata LR1-2 (5960) CTATGTCTTTGGTTTATGTACTATGTTCTTAGTTTCCTTTTTAATGGTGTGTGGCTGGTCTACGGTGTGTGTAGGCTTCCTATTTTATGTATGCTTGTAA

B. carinata LR1-1 (5960) CTATGTCTTTGGTTTATGTACTATGTTCTTAGTTTCCTTTTTAATGGTGTGTGGCTGGTCTACGGTGTGTGTAGGCTTCCTATTTTATGTATGCTTGTAA

B_rapa LRh1a (1622) ----------------------------------------------------------------------------------------------------

B_juncea LRh1a (1623) ----------------------------------------------------------------------------------------------------

B_napus LRh1a (1623) ----------------------------------------------------------------------------------------------------

B_oleracea LRh1a (1584) ----------------------------------------------------------------------------------------------------

7201 7300

Raphanus LR1-1 (6028) AGAGCTAAATAGTGCACGTAGGGTAAACGAGGACTCTGGTCAGCTTTGAGCTGTCGAGTAAGGAGTGACGGGCCTTTGGAAACCCGAGAAAAGCGGGGGA

Raphanus LR1-2 (6028) AGAGCTAAATAGTGCACGTAGGGTAAACGAGGACTCTGGTCAGCTTTGAGCTGTCGAGTAAGGAGTGACGGGCCTTTGGAAACCCGAGAAAAGCGGGGGA

Sinapis LR1-1 (7189) TGCTTCTGCTTTGTCAAATATTCCTTTGAATATCCGGTCTTCATCTTCCTTAGATTAGATGCTACTTCCTTCGTCTAACGCACTGCCCCACAGATAATCA

Sinapis LR1-2 (7189) TGCTTCTGCTTTGTCAAATATTCCTTTGAATATCCGGTCTTCATCTTCCTTAGATTAGATGCTACTTCCTTCGTCTAACGCACTGCCCCACAGATAATCA

B. nigra LR1-1 (6060) TGCTTCTGCTTTGTCAAATATTCCTTTGAATATCCGGTCTTCATCTTCCTTAGATTAGATGCTACTTCCTTCGTCTAACGCACTGCCCCACAGATAATCA

B. nigra LR1-2 (6064) TGCTTCTGCTTTGTCAAATATTCCTTTGAATATCCGGTCTTCATCTTCCTTAGATTAGATGCTACTTCCTTCGTCTAACGCACTGCCCCACAGATAATCA

B. carinata LR1-2 (6060) TGCTTCTGCTTTGTCAAATATTCCTTTGAATATCCGGTCTTCATCTTCCTTAGATTAGATGCTACTTCCTTCGTCTAACGCACTGCCCCACAGATAATCA

B. carinata LR1-1 (6060) TGCTTCTGCTTTGTCAAATATTCCTTTGAATATCCGGTCTTCATCTTCCTTAGATTAGATGCTACTTCCTTCGTCTAACGCACTGCCCCACAGATAATCA

B_rapa LRh1a (1622) ----------------------------------------------------------------------------------------------------

B_juncea LRh1a (1623) ----------------------------------------------------------------------------------------------------

B_napus LRh1a (1623) ----------------------------------------------------------------------------------------------------

B_oleracea LRh1a (1584) ----------------------------------------------------------------------------------------------------

7301 7400

Raphanus LR1-1 (6128) GTACTCTATACAGTGCGTTCTATTATTGCCTCTTATTCCCGAGGGAGTGGTCGTAATTAAGCCGCGTGGCAATACCCGCCAAAAAGGACTCTTTGATTTT

Raphanus LR1-2 (6128) GTACTCTATACAGTGCGTTCTATTATTGCCTCTTATTCCCGAGGGAGTGGTCGTAATTAAGCCGCGTGGCAATACCCGCCAAAAAGGACTCTTTGATTTT

Sinapis LR1-1 (7289) AAGTCTGTAATAGCGGACGATTCTATCAAACCCTAAAGTAGAAGAAAAAGTAGAAGCTACGAAACCATAAAGCTTCCCTCCTGTTTGAAACAGAAAGCAT

Sinapis LR1-2 (7289) AAGTCTGTAATAGCGGACGATTCTATCAAACCCTAAAGTAGAAGAAAAAGTAGAAGCTACGAAACCATAAAGCTTCCCTCCTGTTTGAAACAGAAAGCAT

B. nigra LR1-1 (6160) AAGTCTGTAATAGCGGACGATTCTATCAAACCCTAAAGTAGAAGAAAAAGTAGAAGCTACGAAACCATAAAGCTTCCCTCCTGTTTGAAACAGAAAGCAT

B. nigra LR1-2 (6164) AAGTCTGTAATAGCGGACGATTCTATCAAACCCTAAAGTAGAAGAAAAAGTAGAAGCTACGAAACCATAAAGCTTCCCTCCTGTTTGAAACAGAAAGCAT

B. carinata LR1-2 (6160) AAGTCTGTAATAGCGGACGATTCTATCAAACCCTAAAGTAGAAGAAAAAGTAGAAGCTACGAAACCATAAAGCTTCCCTCCTGTTTGAAACAGAAAGCAT

B. carinata LR1-1 (6160) AAGTCTGTAATAGCGGACGATTCTATCAAACCCTAAAGTAGAAGAAAAAGTAGAAGCTACGAAACCATAAAGCTTCCCTCCTGTTTGAAACAGAAAGCAT

B_rapa LRh1a (1622) ----------------------------------------------------------------------------------------------------

B_juncea LRh1a (1623) ----------------------------------------------------------------------------------------------------

B_napus LRh1a (1623) ----------------------------------------------------------------------------------------------------

B_oleracea LRh1a (1584) ----------------------------------------------------------------------------------------------------

7401 7500

Raphanus LR1-1 (6228) GAGGGGCGGGGCCTTTATCCAGGGGAGAATTCTTCAGCGCACTAAAATCTAGTTAAGGGGGTTCCATATTCATGAAAAGCCGGGGTTGAACCATGTTACG

Raphanus LR1-2 (6228) GAGGGGCGGGGCCTTTATCCAGGGGAGAATTCTTCAGCGCACTAAAATCTAGTTAAGGGGGTTCCATATTCATGAAAAGCCGGGGTTGAACCATGTTACG

Sinapis LR1-1 (7389) TGATATCATTGGACACTAAAGGGTCAAACTTTGCTTTGTGCTGTTCACATAGTCGACTGGGAAACGGAAAATCTCATTAATCTTAGTATTACAGACTTTT

Sinapis LR1-2 (7389) TGATATCATTGGACACTAAAGGGTCAAACTTTGCTTTGTGCTGTTCACATAGTCGACTGGGAAACGGAAAATCTCATTAATCTTAGTATTACAGACTTTT

B. nigra LR1-1 (6260) TGATATCATTGGACACTAAAGGGTCAAACTTTGCTTTGTGCTGTTCACATAGTCGACTGGGAAACGGAAAATCTCATTAATCTTAGTATTACAGACTTTT

B. nigra LR1-2 (6264) TGATATCATTGGACACTAAAGGGTCAAACTTTGCTTTGTGCTGTTCACATAGTCGACTGGGAAACGGAAAATCTCATTAATCTTAGTATTACAGACTTTT

B. carinata LR1-2 (6260) TGATATCATTGGACACTAAAGGGTCAAACTTTGCTTTGTGCTGTTCACATAGTCGACTGGGAAACGGAAAATCTCATTAATCTTAGTATTACAGACTTTT

B. carinata LR1-1 (6260) TGATATCATTGGACACTAAAGGGTCAAACTTTGCTTTGTGCTGTTCACATAGTCGACTGGGAAACGGAAAATCTCATTAATCTTAGTATTACAGACTTTT

B_rapa LRh1a (1622) ----------------------------------------------------------------------------------------------------

B_juncea LRh1a (1623) ----------------------------------------------------------------------------------------------------

B_napus LRh1a (1623) ----------------------------------------------------------------------------------------------------

B_oleracea LRh1a (1584) ----------------------------------------------------------------------------------------------------

7501 7600

Raphanus LR1-1 (6328) GAACTAAGACAAGAATTATGACTAATAAGAAAGGGTTTAGGGCCTGCCTATAAATAGAAGCTTCTTTCAGTCTCTATTTGGCAAAGAGGGCACTTAGAAG

Raphanus LR1-2 (6328) GAACTAAGACAAGAATTATGACTAATAAGAAAGGGTTTAGGGCCTGCCTATAAATAGAAGCTTCTTTCAGTCTCTATTTGGCAAAGAGGGCACTTAGAAG

Sinapis LR1-1 (7489) TACGAAGCGAGAGGAAAAGACGGCAAAGTCTTAACTAAACTATTCCGACTGAATATGAGCCTAAAAAAAATGCGAACTTCCTTCAATGCCTTCTCATTAG

Sinapis LR1-2 (7489) TACGAAGCGAGAGGAAAAGACGGCAAAGTCTTAACTAAACTATTCCGACTGAATATGAGCCTAAAAAAAATGCGAACTTCCTTCAATGCCTTCTCATTAG

B. nigra LR1-1 (6360) TACGAAGCGAGAGGAAAAGACGGCAAAGTCTTAACTAAACTATTCCGACTGAATATGAGCCTAAAAAAAATGCGAACTTCCTTCAATGCCTTCTCATTAG

B. nigra LR1-2 (6364) TACGAAGCGAGAGGAAAAGACGGCAAAGTCTTAACTAAACTATTCCGACTGAATATGAGCCTAAAAAAAATGCGAACTTCCTTCAATGCCTTCTCATTAG

B. carinata LR1-2 (6360) TACGAAGCGAGAGGAAAAGACGGCAAAGTCTTAACTAAACTATTCCGACTGAATATGAGCCTAAAAAAAATGCGAACTTCCTTCAATGCCTTCTCATTAG

B. carinata LR1-1 (6360) TACGAAGCGAGAGGAAAAGACGGCAAAGTCTTAACTAAACTATTCCGACTGAATATGAGCCTAAAAAAAATGCGAACTTCCTTCAATGCCTTCTCATTAG

B_rapa LRh1a (1622) ----------------------------------------------------------------------------------------------------

B_juncea LRh1a (1623) ----------------------------------------------------------------------------------------------------

B_napus LRh1a (1623) ----------------------------------------------------------------------------------------------------

B_oleracea LRh1a (1584) ----------------------------------------------------------------------------------------------------

7601 7700

Raphanus LR1-1 (6428) TCGGCAAGAAAGTGAGTAGACATGGATATCGCGAACAGACTGGCGAGCATTCAACAAGAAATACAAACCGTGGAAAACGAAAAGCTCCAATGTGAGCAAA

Raphanus LR1-2 (6428) TCGGCAAGAAAGTGAGTAGACATGGATATCGCGAACAGACTGGCGAGCATTCAACAAGAAATACAAACCGTGGAAAACGAAAAGCTCCAATGTGAGCAAA

Sinapis LR1-1 (7589) TATCTGCTGTGTCGCTAAGCATTCTTTCCATCCGCTAATGGACCTAT-CTCGACGGAATCGGCGTGCAGGAGCGTACTGCAGAACTATGACCCATACAGT

Sinapis LR1-2 (7589) TATCTGCTGTGTCGCTAAGCATTCTTTCCATCCGCTAATGGACCTAT-CTCGACGGAATCGGCGTGCAGGAGCGTACTGCAGAACTATGACCCATACAGT

B. nigra LR1-1 (6460) TATCTGCTGTGTCGCTAAGCATTCTTTCCATCCGCTAATGGACCTATGCTCGACGGAATCGGCGTGCAGGAGCGTACTGCAGAACTATGACCCATACAGT

B. nigra LR1-2 (6464) TATCTGCTGTGTCGCTAAGCATTCTTTCCATCCGCTAATGGACCTATGCTCGACGGAATCGGCGTGCAGGAGCGTACTGCAGAACTATGACCCATACAGT

B. carinata LR1-2 (6460) TATCTGCTGTGTCGCTAAGCATTCTTTCCATCCGCTAATGGACCTATGCTCGACGGAATCGGCGTGCAGGAGCGTACTGCAGAACTATGACCCATACAGT

B. carinata LR1-1 (6460) TATCTGCTGTGTCGCTAAGCATTCTTTCCATCCGCTAATGGACCTATGCTCGACGGAATCGGCGTGCAGGAGCGTACTGCAGAACTATGACCCATACAGT

B_rapa LRh1a (1622) ----------------------------------------------------------------------------------------------------

B_juncea LRh1a (1623) ----------------------------------------------------------------------------------------------------

B_napus LRh1a (1623) ----------------------------------------------------------------------------------------------------

B_oleracea LRh1a (1584) ----------------------------------------------------------------------------------------------------

7701 7800

Raphanus LR1-1 (6528) TGCTTGGTCTGTTCTGGGAGCATCCGCCTGCTCTCGATCCGGAGGTCGTGGGCAGAAGGATGCAACTTTTACGGGACCGCATTCGCGGTCTGAAACACAG

Raphanus LR1-2 (6528) TGCTTGGTCTGTTCTGGGAGCATCCGCCTGCTCTCGATCCGGAGGTCGTGGGCAGAAGGATGCAACTTTTACGGGACCGCATTCGCGGTCTGAAACACAG

Sinapis LR1-1 (7688) GGAAGCTCTGGTCCC-------------------------------------------------------------------------------------

Sinapis LR1-2 (7688) GGAAGCTCTGGTCCC-------------------------------------------------------------------------------------

B. nigra LR1-1 (6560) GGAAGCTCTGGTCCC-------------------------------------------------------------------------------------

B. nigra LR1-2 (6564) GGAAGCTCTGGTCCC-------------------------------------------------------------------------------------

B. carinata LR1-2 (6560) GGAAGCTCTGGTCCCACTAAT-------------------------------------------------------------------------------

B. carinata LR1-1 (6560) GGAAGCTCTGGTCCCGCTTAT-------------------------------------------------------------------------------

B_rapa LRh1a (1622) ----------------------------------------------------------------------------------------------------

B_juncea LRh1a (1623) ----------------------------------------------------------------------------------------------------

B_napus LRh1a (1623) ----------------------------------------------------------------------------------------------------

B_oleracea LRh1a (1584) ----------------------------------------------------------------------------------------------------

7801 7900

Raphanus LR1-1 (6628) GATTTCTTTTCTCCTGAAGGAGCAGGAAGGCCTAATAATACAGGCTGTCACCCACGGTCGCCGGGGAGACTAGAATAGAAGAGTCCGCCAACTTCCTATA

Raphanus LR1-2 (6628) GATTTCTTTTCTCCTGAAGGAGCAGGAAGGCCTAATAATACAGGCTGTCACCCACGGTCGCCGGGGAGACTAGAATAGAAGAGTCCGCCAACTTCCTATA

Sinapis LR1-1 (7703) ----------------------------------------------------------------------------------------------------

Sinapis LR1-2 (7703) ----------------------------------------------------------------------------------------------------

B. nigra LR1-1 (6575) ----------------------------------------------------------------------------------------------------

B. nigra LR1-2 (6579) ----------------------------------------------------------------------------------------------------

B. carinata LR1-2 (6581) ----------------------------------------------------------------------------------------------------

B. carinata LR1-1 (6581) ----------------------------------------------------------------------------------------------------

B_rapa LRh1a (1622) ----------------------------------------------------------------------------------------------------

B_juncea LRh1a (1623) ----------------------------------------------------------------------------------------------------

B_napus LRh1a (1623) ----------------------------------------------------------------------------------------------------

B_oleracea LRh1a (1584) ----------------------------------------------------------------------------------------------------

7901 8000

Raphanus LR1-1 (6728) TCGCTAAAATGGAAAATAAGGAGTCCGTCGACCCAAAGTCTTGTATGCTTGCTCTATGTCTTTGGTTTATGTACTATGTTCTTAGTTTCCTTTTTAATGG

Raphanus LR1-2 (6728) TCGCTAAAATGGAAAATAAGGAGTCCGTCGACCCAAAGTCTTGTATGCTTGCTCTATGTCTTTGGTTTATGTACTATGTTCTTAGTTTCCTTTTTAATGG

Sinapis LR1-1 (7703) ----------------------------------------------------------------------------------------------------

Sinapis LR1-2 (7703) ----------------------------------------------------------------------------------------------------

B. nigra LR1-1 (6575) ----------------------------------------------------------------------------------------------------

B. nigra LR1-2 (6579) ----------------------------------------------------------------------------------------------------

B. carinata LR1-2 (6581) ----------------------------------------------------------------------------------------------------

B. carinata LR1-1 (6581) ----------------------------------------------------------------------------------------------------

B_rapa LRh1a (1622) ----------------------------------------------------------------------------------------------------

B_juncea LRh1a (1623) ----------------------------------------------------------------------------------------------------

B_napus LRh1a (1623) ----------------------------------------------------------------------------------------------------

B_oleracea LRh1a (1584) ----------------------------------------------------------------------------------------------------

8001 8100

Raphanus LR1-1 (6828) TGTGTGGCTGGTCTACGGTGTGTGTAGGCTTCCTATTTTATGTATGCTTGTAATGCTTCTGCTTTGTCAAATATTCCTTTGAATATCCGGTCTTCATCTT

Raphanus LR1-2 (6828) TGTGTGGCTGGTCTACGGTGTGTGTAGGCTTCCTATTTTATGTATGCTTGTAATGCTTCTGCTTTGTCAAATATTCCTTTGAATATCCGGTCTTCATCTT

Sinapis LR1-1 (7703) ----------------------------------------------------------------------------------------------------

Sinapis LR1-2 (7703) ----------------------------------------------------------------------------------------------------

B. nigra LR1-1 (6575) ----------------------------------------------------------------------------------------------------

B. nigra LR1-2 (6579) ----------------------------------------------------------------------------------------------------

B. carinata LR1-2 (6581) ----------------------------------------------------------------------------------------------------

B. carinata LR1-1 (6581) ----------------------------------------------------------------------------------------------------

B_rapa LRh1a (1622) ----------------------------------------------------------------------------------------------------

B_juncea LRh1a (1623) ----------------------------------------------------------------------------------------------------

B_napus LRh1a (1623) ----------------------------------------------------------------------------------------------------

B_oleracea LRh1a (1584) ----------------------------------------------------------------------------------------------------

8101 8200

Raphanus LR1-1 (6928) CCTTAGATTAGATGCTACTTCCTTCGTCTAACGCACTGCCCCACAGATAATCAAAGTCTGTAATAGCGGACGATTCTATCAAACCCTAAAGTAGAAGAAA

Raphanus LR1-2 (6928) CCTTAGATTAGATGCTACTTCCTTCGTCTAACGCACTGCCCCACAGATAATCAAAGTCTGTAATAGCGGACGATTCTATCAAACCCTAAAGTAGAAGAAA

Sinapis LR1-1 (7703) ----------------------------------------------------------------------------------------------------

Sinapis LR1-2 (7703) ----------------------------------------------------------------------------------------------------

B. nigra LR1-1 (6575) ----------------------------------------------------------------------------------------------------

B. nigra LR1-2 (6579) ----------------------------------------------------------------------------------------------------

B. carinata LR1-2 (6581) ----------------------------------------------------------------------------------------------------

B. carinata LR1-1 (6581) ----------------------------------------------------------------------------------------------------

B_rapa LRh1a (1622) ----------------------------------------------------------------------------------------------------

B_juncea LRh1a (1623) ----------------------------------------------------------------------------------------------------

B_napus LRh1a (1623) ----------------------------------------------------------------------------------------------------

B_oleracea LRh1a (1584) ----------------------------------------------------------------------------------------------------

8201 8300

Raphanus LR1-1 (7028) AAGTAGAAGCTACGAAACCATAAAGCTTCCCTCCTGTTTGAAACAGAAAGCATTGATATCATTGGACACTAAAGGGTCAAACTTTGCTTTGTGCTGTTCA

Raphanus LR1-2 (7028) AAGTAGAAGCTACGAAACCATAAAGCTTCCCTCCTGTTTGAAACAGAAAGCATTGATATCATTGGACACTAAAGGGTCAAACTTTGCTTTGTGCTGTTCA

Sinapis LR1-1 (7703) ----------------------------------------------------------------------------------------------------

Sinapis LR1-2 (7703) ----------------------------------------------------------------------------------------------------

B. nigra LR1-1 (6575) ----------------------------------------------------------------------------------------------------

B. nigra LR1-2 (6579) ----------------------------------------------------------------------------------------------------

B. carinata LR1-2 (6581) ----------------------------------------------------------------------------------------------------

B. carinata LR1-1 (6581) ----------------------------------------------------------------------------------------------------

B_rapa LRh1a (1622) ----------------------------------------------------------------------------------------------------

B_juncea LRh1a (1623) ----------------------------------------------------------------------------------------------------

B_napus LRh1a (1623) ----------------------------------------------------------------------------------------------------

B_oleracea LRh1a (1584) ----------------------------------------------------------------------------------------------------

8301 8400

Raphanus LR1-1 (7128) CATAGTCGACTGGGAAACGGAAAATCTCATTAATCTTAGTATTACAGACTTTTTACGAAGCGAGAGGAAAAGACGGCAAAGTCTTAACTAAACCCTGAAA

Raphanus LR1-2 (7128) CATAGTCGACTGGGAAACGGAAAATCTCATTAATCTTAGTATTACAGACTTTTTACGAAGCGAGAGGAAAAGACGGCAAAGTCTTAACTAAACCCTGAAA

Sinapis LR1-1 (7703) ----------------------------------------------------------------------------------------------------

Sinapis LR1-2 (7703) ----------------------------------------------------------------------------------------------------

B. nigra LR1-1 (6575) ----------------------------------------------------------------------------------------------------

B. nigra LR1-2 (6579) ----------------------------------------------------------------------------------------------------

B. carinata LR1-2 (6581) ----------------------------------------------------------------------------------------------------

B. carinata LR1-1 (6581) ----------------------------------------------------------------------------------------------------

B_rapa LRh1a (1622) ----------------------------------------------------------------------------------------------------

B_juncea LRh1a (1623) ----------------------------------------------------------------------------------------------------

B_napus LRh1a (1623) ----------------------------------------------------------------------------------------------------

B_oleracea LRh1a (1584) ----------------------------------------------------------------------------------------------------

8401 8500

Raphanus LR1-1 (7228) GCCTAAAAAAACGAACTTCCTTCAATGCCTTCTCATTAGTATCTGCTGTGTCGCTAAGCATTCTTTCCATCCGCTAATGGACCTCTTGATGCTCGACCAG

Raphanus LR1-2 (7228) GCCTAAAAAAACGAACTTCCTTCAATGCCTTCTCATTAGTATCTGCTGTGTCGCTAAGCATTCTTTCCATCCGCTAATGGACCTCTTGATGCTCGACCAG

Sinapis LR1-1 (7703) ----------------------------------------------------------------------------------------------------

Sinapis LR1-2 (7703) ----------------------------------------------------------------------------------------------------

B. nigra LR1-1 (6575) ----------------------------------------------------------------------------------------------------

B. nigra LR1-2 (6579) ----------------------------------------------------------------------------------------------------

B. carinata LR1-2 (6581) ----------------------------------------------------------------------------------------------------

B. carinata LR1-1 (6581) ----------------------------------------------------------------------------------------------------

B_rapa LRh1a (1622) ----------------------------------------------------------------------------------------------------

B_juncea LRh1a (1623) ----------------------------------------------------------------------------------------------------

B_napus LRh1a (1623) ----------------------------------------------------------------------------------------------------

B_oleracea LRh1a (1584) ----------------------------------------------------------------------------------------------------

8501 8600

Raphanus LR1-1 (7328) CCATCAACCGCATCTGACTTTGATCCATAAGTAGATTCAATAGGAGGGTACCATCTCGCTTCTCTTTCCTTGTACGTTCCAGCTCGCTTCGTCTGCTTCA

Raphanus LR1-2 (7328) CCATCAACCGCATCTGACTTTGATCCATAAGTAGATTCAATAGGAGGGTACCATCTCGCTTCTCTTTCCTTGTACGTTCCAGCTCGCTTCGTCTGCTTCA

Sinapis LR1-1 (7703) ----------------------------------------------------------------------------------------------------

Sinapis LR1-2 (7703) ----------------------------------------------------------------------------------------------------

B. nigra LR1-1 (6575) ----------------------------------------------------------------------------------------------------

B. nigra LR1-2 (6579) ----------------------------------------------------------------------------------------------------

B. carinata LR1-2 (6581) ----------------------------------------------------------------------------------------------------

B. carinata LR1-1 (6581) ----------------------------------------------------------------------------------------------------

B_rapa LRh1a (1622) ----------------------------------------------------------------------------------------------------

B_juncea LRh1a (1623) ----------------------------------------------------------------------------------------------------

B_napus LRh1a (1623) ----------------------------------------------------------------------------------------------------

B_oleracea LRh1a (1584) ----------------------------------------------------------------------------------------------------

8601 8700

Raphanus LR1-1 (7428) GAGTGGGAAAAGAAGAAGGTAGAAAACCGAGGTGAGCAAAAGGCTCTTTCTTCTTAATACGCTTAGATAGTTCATTGACTTACGCTTAGATTAGATAGTT

Raphanus LR1-2 (7428) GAGTGGGAAAAGAAGAAGGTAGAAAACCGAGGTGAGCAAAAGGCTCTTTCTTCTTAATACGCTTAGATAGTTCATTGACTTACGCTTAGATTAGATAGTT

Sinapis LR1-1 (7703) ----------------------------------------------------------------------------------------------------

Sinapis LR1-2 (7703) ----------------------------------------------------------------------------------------------------

B. nigra LR1-1 (6575) ----------------------------------------------------------------------------------------------------

B. nigra LR1-2 (6579) ----------------------------------------------------------------------------------------------------

B. carinata LR1-2 (6581) ----------------------------------------------------------------------------------------------------

B. carinata LR1-1 (6581) ----------------------------------------------------------------------------------------------------

B_rapa LRh1a (1622) ----------------------------------------------------------------------------------------------------

B_juncea LRh1a (1623) ----------------------------------------------------------------------------------------------------

B_napus LRh1a (1623) ----------------------------------------------------------------------------------------------------

B_oleracea LRh1a (1584) ----------------------------------------------------------------------------------------------------

8701 8800

Raphanus LR1-1 (7528) CATTGACTACGAGACTGGAATCTGATGCTTCTTTATGGTCCGATCCTAAAAGCAAGAGAAGTTTAGGTAGGAGTACGTCGCTTCTTTCTTTTTCATATCT

Raphanus LR1-2 (7528) CATTGACTACGAGACTGGAATCTGATGCTTCTTTATGGTCCGATCCTAAAAGCAAGAGAAGTTTAGGTAGGAGTACGTCGCTTCTTTCTTTTTCATATCT

Sinapis LR1-1 (7703) ----------------------------------------------------------------------------------------------------

Sinapis LR1-2 (7703) ----------------------------------------------------------------------------------------------------

B. nigra LR1-1 (6575) ----------------------------------------------------------------------------------------------------

B. nigra LR1-2 (6579) ----------------------------------------------------------------------------------------------------

B. carinata LR1-2 (6581) ----------------------------------------------------------------------------------------------------

B. carinata LR1-1 (6581) ----------------------------------------------------------------------------------------------------

B_rapa LRh1a (1622) ----------------------------------------------------------------------------------------------------

B_juncea LRh1a (1623) ----------------------------------------------------------------------------------------------------

B_napus LRh1a (1623) ----------------------------------------------------------------------------------------------------

B_oleracea LRh1a (1584) ----------------------------------------------------------------------------------------------------

8801 8900

Raphanus LR1-1 (7628) GCTGTCCCAGCTGAGTTCCGCTATCAACTAATTATAGTCGCATAGCAAGCGATGTAATAAATCACTGAGATCTTTTGAATTTCAAGTAAATCATAGATAA

Raphanus LR1-2 (7628) GCTGTCCCAGCTGAGTTCCGCTATCAACTAATTATAGTCGCATAGCAAGCGATGTAATAAATCACTGAGATCTTTTGAATTTCAAGTAAATCATAGATAA

Sinapis LR1-1 (7703) ----------------------------------------------------------------------------------------------------

Sinapis LR1-2 (7703) ----------------------------------------------------------------------------------------------------

B. nigra LR1-1 (6575) ----------------------------------------------------------------------------------------------------

B. nigra LR1-2 (6579) ----------------------------------------------------------------------------------------------------

B. carinata LR1-2 (6581) ----------------------------------------------------------------------------------------------------

B. carinata LR1-1 (6581) ----------------------------------------------------------------------------------------------------

B_rapa LRh1a (1622) ----------------------------------------------------------------------------------------------------

B_juncea LRh1a (1623) ----------------------------------------------------------------------------------------------------

B_napus LRh1a (1623) ----------------------------------------------------------------------------------------------------

B_oleracea LRh1a (1584) ----------------------------------------------------------------------------------------------------

8901 9000

Raphanus LR1-1 (7728) AGCATTAAGTAGGAGCGGTAGCTTTCTGCTTCGGTTGGCGCGTTGCAGTAATGAAGAAAAGAATGAGATTGGTTCGGTCTTAAGTCTTTGGGTGAATCAA

Raphanus LR1-2 (7728) AGCATTAAGTAGGAGCGGTAGCTTTCTGCTTCGGTTGGCGCGTTGCAGTAATGAAGAAAAGAATGAGATTGGTTCGGTCTTAAGTCTTTGGGTGAATCAA

Sinapis LR1-1 (7703) ----------------------------------------------------------------------------------------------------

Sinapis LR1-2 (7703) ----------------------------------------------------------------------------------------------------

B. nigra LR1-1 (6575) ----------------------------------------------------------------------------------------------------

B. nigra LR1-2 (6579) ----------------------------------------------------------------------------------------------------

B. carinata LR1-2 (6581) ----------------------------------------------------------------------------------------------------

B. carinata LR1-1 (6581) ----------------------------------------------------------------------------------------------------

B_rapa LRh1a (1622) ----------------------------------------------------------------------------------------------------

B_juncea LRh1a (1623) ----------------------------------------------------------------------------------------------------

B_napus LRh1a (1623) ----------------------------------------------------------------------------------------------------

B_oleracea LRh1a (1584) ----------------------------------------------------------------------------------------------------

9001 9100

Raphanus LR1-1 (7828) TTTAGGTATCGAAGTTTTAGTTATTGCCATCCCTTGCTTGGCAGCAGTGGGCTTGGTAGTAGCATAGGTGGGTCCTCGGGCAGTTTTTTCAGGGCGTAGG

Raphanus LR1-2 (7828) TTTAGGTATCGAAGTTTTAGTTATTGCCATCCCTTGCTTGGCAGCAGTGGGCTTGGTAGTAGCATAGGTGGGTCCTCGGGCAGTTTTTTCAGGGCGTAGG

Sinapis LR1-1 (7703) ----------------------------------------------------------------------------------------------------

Sinapis LR1-2 (7703) ----------------------------------------------------------------------------------------------------

B. nigra LR1-1 (6575) ----------------------------------------------------------------------------------------------------

B. nigra LR1-2 (6579) ----------------------------------------------------------------------------------------------------

B. carinata LR1-2 (6581) ----------------------------------------------------------------------------------------------------

B. carinata LR1-1 (6581) ----------------------------------------------------------------------------------------------------

B_rapa LRh1a (1622) ----------------------------------------------------------------------------------------------------

B_juncea LRh1a (1623) ----------------------------------------------------------------------------------------------------

B_napus LRh1a (1623) ----------------------------------------------------------------------------------------------------

B_oleracea LRh1a (1584) ----------------------------------------------------------------------------------------------------

9101 9200

Raphanus LR1-1 (7928) GATCACTGTCTCACTGTGGTACCCGAAAACTTTCTATGCCCACATTTCATAGTTTGAAAGCGCTCTTTAGTGACTTTGTTTGAAAGCGCTCTTTAGTGAC

Raphanus LR1-2 (7928) GATCACTGTCTCACTGTGGTACCCGAAAACTTTCTATGCCCACATTTCATAGTTTGAAAGCGCTCTTTAGTGACTTTGTTTGAAAGCGCTCTTTAGTGAC

Sinapis LR1-1 (7703) ----------------------------------------------------------------------------------------------------

Sinapis LR1-2 (7703) ----------------------------------------------------------------------------------------------------

B. nigra LR1-1 (6575) ----------------------------------------------------------------------------------------------------

B. nigra LR1-2 (6579) ----------------------------------------------------------------------------------------------------

B. carinata LR1-2 (6581) ----------------------------------------------------------------------------------------------------

B. carinata LR1-1 (6581) ----------------------------------------------------------------------------------------------------

B_rapa LRh1a (1622) ----------------------------------------------------------------------------------------------------

B_juncea LRh1a (1623) ----------------------------------------------------------------------------------------------------

B_napus LRh1a (1623) ----------------------------------------------------------------------------------------------------

B_oleracea LRh1a (1584) ----------------------------------------------------------------------------------------------------

9201 9300

Raphanus LR1-1 (8028) TTTCATGTCTTCTGCTACTTTGACTTTAGGAAGATTCAGACAGTCTTTTATGCCCTCTTTTAGGTTTGTTTTTTCCTTCCCCCAATTCTAGGATGCGTAG

Raphanus LR1-2 (8028) TTTCATGTCTTCTGCTACTTTGACTTTAGGAAGATTCAGACAGTCTTTTATGCCCTCTTTTAGGTTTGTTTTTTCCTTCCCCCAATTCTAGGATGCGTAG

Sinapis LR1-1 (7703) ----------------------------------------------------------------------------------------------------

Sinapis LR1-2 (7703) ----------------------------------------------------------------------------------------------------

B. nigra LR1-1 (6575) ----------------------------------------------------------------------------------------------------

B. nigra LR1-2 (6579) ----------------------------------------------------------------------------------------------------

B. carinata LR1-2 (6581) ----------------------------------------------------------------------------------------------------

B. carinata LR1-1 (6581) ----------------------------------------------------------------------------------------------------

B_rapa LRh1a (1622) ----------------------------------------------------------------------------------------------------

B_juncea LRh1a (1623) ----------------------------------------------------------------------------------------------------

B_napus LRh1a (1623) ----------------------------------------------------------------------------------------------------

B_oleracea LRh1a (1584) ----------------------------------------------------------------------------------------------------

9301 9400

Raphanus LR1-1 (8128) TAGCTCTAGTAAGTCCGTAGCTGGATCTGGCAGGATGCGGAGTTTGAGCTGCGGGGTGAGGGATGGGATAGACATAGCCATCTCTCCCTTCTCCGGCTCT

Raphanus LR1-2 (8128) TAGCTCTAGTAAGTCCGTAGCTGGATCTGGCAGGATGCGGAGTTTGAGCTGCGGGGTGAGGGATGGGATAGACATAGCCATCTCTCCCTTCTCCGGCTCT

Sinapis LR1-1 (7703) ----------------------------------------------------------------------------------------------------

Sinapis LR1-2 (7703) ----------------------------------------------------------------------------------------------------

B. nigra LR1-1 (6575) ----------------------------------------------------------------------------------------------------

B. nigra LR1-2 (6579) ----------------------------------------------------------------------------------------------------

B. carinata LR1-2 (6581) ----------------------------------------------------------------------------------------------------

B. carinata LR1-1 (6581) ----------------------------------------------------------------------------------------------------

B_rapa LRh1a (1622) ----------------------------------------------------------------------------------------------------

B_juncea LRh1a (1623) ----------------------------------------------------------------------------------------------------

B_napus LRh1a (1623) ----------------------------------------------------------------------------------------------------

B_oleracea LRh1a (1584) ----------------------------------------------------------------------------------------------------

9401 9500

Raphanus LR1-1 (8228) TCTCTTATGGTCTCTAATGATGGCTTATCCACTACTACTTGCTTCCTTCCCTTTATCCTTCCTCACAACAACTTGCTCCTCTTCCTTATCATCTCTCACA

Raphanus LR1-2 (8228) TCTCTTATGGTCTCTAATGATGGCTTATCCACTACTACTTGCTTCCTTCCCTTTATCCTTCCTCACAACAACTTGCTCCTCTTCCTTATCATCTCTCACA

Sinapis LR1-1 (7703) ----------------------------------------------------------------------------------------------------

Sinapis LR1-2 (7703) ----------------------------------------------------------------------------------------------------

B. nigra LR1-1 (6575) ----------------------------------------------------------------------------------------------------

B. nigra LR1-2 (6579) ----------------------------------------------------------------------------------------------------

B. carinata LR1-2 (6581) ----------------------------------------------------------------------------------------------------

B. carinata LR1-1 (6581) ----------------------------------------------------------------------------------------------------

B_rapa LRh1a (1622) ----------------------------------------------------------------------------------------------------

B_juncea LRh1a (1623) ----------------------------------------------------------------------------------------------------

B_napus LRh1a (1623) ----------------------------------------------------------------------------------------------------

B_oleracea LRh1a (1584) ----------------------------------------------------------------------------------------------------

9501 9600

Raphanus LR1-1 (8328) ACTGCCTCAATCAGTTTCCCTTTCTTCCCAGGTGCGCTTGATTGGGAAGAAAGATCTGGGGTGGGGAATCTATCAACTTGCAGCAGCCCCAGTCTTCCTT

Raphanus LR1-2 (8328) ACTGCCTCAATCAGTTTCCCTTTCTTCCCAGGTGCGCTTGATTGGGAAGAAAGATCTGGGGTGGGGAATCTATCAACTTGCAGCAGCCCCAGTCTTCCTT

Sinapis LR1-1 (7703) ----------------------------------------------------------------------------------------------------

Sinapis LR1-2 (7703) ----------------------------------------------------------------------------------------------------

B. nigra LR1-1 (6575) ----------------------------------------------------------------------------------------------------

B. nigra LR1-2 (6579) ----------------------------------------------------------------------------------------------------

B. carinata LR1-2 (6581) ----------------------------------------------------------------------------------------------------

B. carinata LR1-1 (6581) ----------------------------------------------------------------------------------------------------

B_rapa LRh1a (1622) ----------------------------------------------------------------------------------------------------

B_juncea LRh1a (1623) ----------------------------------------------------------------------------------------------------

B_napus LRh1a (1623) ----------------------------------------------------------------------------------------------------

B_oleracea LRh1a (1584) ----------------------------------------------------------------------------------------------------

9601 9700

Raphanus LR1-1 (8428) CTCCTTTGAGCACCGGCTTTTAATGGGTATGAAAGAACTAGATGGGAGGCCTTTTCCGGGTAAGAGAAATAGTAGTGAGAGGTAGTGAAAGCCCTTTCGT

Raphanus LR1-2 (8428) CTCCTTTGAGCACCGGCTTTTAATGGGTATGAAAGAACTAGATGGGAGGCCTTTTCCGGGTAAGAGAAATAGTAGTGAGAGGTAGTGAAAGCCCTTTCGT

Sinapis LR1-1 (7703) ----------------------------------------------------------------------------------------------------

Sinapis LR1-2 (7703) ----------------------------------------------------------------------------------------------------

B. nigra LR1-1 (6575) ----------------------------------------------------------------------------------------------------

B. nigra LR1-2 (6579) ----------------------------------------------------------------------------------------------------

B. carinata LR1-2 (6581) ----------------------------------------------------------------------------------------------------

B. carinata LR1-1 (6581) ----------------------------------------------------------------------------------------------------

B_rapa LRh1a (1622) ----------------------------------------------------------------------------------------------------

B_juncea LRh1a (1623) ----------------------------------------------------------------------------------------------------

B_napus LRh1a (1623) ----------------------------------------------------------------------------------------------------

B_oleracea LRh1a (1584) ----------------------------------------------------------------------------------------------------

9701 9800

Raphanus LR1-1 (8528) CCTTTATAACTAGTACATTTTATCGTGTAGATAACAGAGGCAAGCAGGACAGACGATCAATCCCTCTTCTAGTAATGGCACCACTCTTCTTAGGTTAGAA

Raphanus LR1-2 (8528) CCTTTATAACTAGTACATTTTATCGTGTAGATAACAGAGGCAAGCAGGACAGACGATCAATCCCTCTTCTAGTAATGGCACCACTCTTCTTAGGTTAGAA

Sinapis LR1-1 (7703) ----------------------------------------------------------------------------------------------------

Sinapis LR1-2 (7703) ----------------------------------------------------------------------------------------------------

B. nigra LR1-1 (6575) ----------------------------------------------------------------------------------------------------

B. nigra LR1-2 (6579) ----------------------------------------------------------------------------------------------------

B. carinata LR1-2 (6581) ----------------------------------------------------------------------------------------------------

B. carinata LR1-1 (6581) ----------------------------------------------------------------------------------------------------

B_rapa LRh1a (1622) ----------------------------------------------------------------------------------------------------

B_juncea LRh1a (1623) ----------------------------------------------------------------------------------------------------

B_napus LRh1a (1623) ----------------------------------------------------------------------------------------------------

B_oleracea LRh1a (1584) ----------------------------------------------------------------------------------------------------

9801 9900

Raphanus LR1-1 (8628) CCCATTCCCATTGGCTTCCTACAGGTATAGTGAGATGTACAGGAAGACGGAGACCTTTTGAATTATAGACGACTAGTAGTGCGAAGCAATTCCATCCGAT

Raphanus LR1-2 (8628) CCCATTCCCATTGGCTTCCTACAGGTATAGTGAGATGTACAGGAAGACGGAGACCTTTTGAATTATAGACGACTAGTAGTGCGAAGCAATTCCATCCGAT

Sinapis LR1-1 (7703) ----------------------------------------------------------------------------------------------------

Sinapis LR1-2 (7703) ----------------------------------------------------------------------------------------------------

B. nigra LR1-1 (6575) ----------------------------------------------------------------------------------------------------

B. nigra LR1-2 (6579) ----------------------------------------------------------------------------------------------------

B. carinata LR1-2 (6581) ----------------------------------------------------------------------------------------------------

B. carinata LR1-1 (6581) ----------------------------------------------------------------------------------------------------

B_rapa LRh1a (1622) ----------------------------------------------------------------------------------------------------

B_juncea LRh1a (1623) ----------------------------------------------------------------------------------------------------

B_napus LRh1a (1623) ----------------------------------------------------------------------------------------------------

B_oleracea LRh1a (1584) ----------------------------------------------------------------------------------------------------

9901 10000

Raphanus LR1-1 (8728) TTTCGAGAAAGAAAAGAGTGAGTTAGCTTATTTTTACGTCGGATGAAAGAGATAATTCTAACTAGCCGGAGACAGAGATATAGAAAGTTTGCAGTGCGGT

Raphanus LR1-2 (8728) TTTCGAGAAAGAAAAGAGTGAGTTAGCTTATTTTTACGTCGGATGAAAGAGATAATTCTAACTAGCCGGAGACAGAGATATAGAAAGTTTGCAGTGCGGT

Sinapis LR1-1 (7703) ----------------------------------------------------------------------------------------------------

Sinapis LR1-2 (7703) ----------------------------------------------------------------------------------------------------

B. nigra LR1-1 (6575) ----------------------------------------------------------------------------------------------------

B. nigra LR1-2 (6579) ----------------------------------------------------------------------------------------------------

B. carinata LR1-2 (6581) ----------------------------------------------------------------------------------------------------

B. carinata LR1-1 (6581) ----------------------------------------------------------------------------------------------------

B_rapa LRh1a (1622) ----------------------------------------------------------------------------------------------------

B_juncea LRh1a (1623) ----------------------------------------------------------------------------------------------------

B_napus LRh1a (1623) ----------------------------------------------------------------------------------------------------

B_oleracea LRh1a (1584) ----------------------------------------------------------------------------------------------------

10001 10100

Raphanus LR1-1 (8828) ATCGCCCATGACCTTCTGCGAGAGTGAGATAGAAAGCTGGAAGGTTGGATTGAATCGGATTATCCATTGAGCTAGTCCGTTTTCCTAGTAATGTAAAAAA

Raphanus LR1-2 (8828) ATCGCCCATGACCTTCTGCGAGAGTGAGATAGAAAGCTGGAAGGTTGGATTGAATCGGATTATCCATTGAGCTAGTCCGTTTTCCTAGTAATGTAAAAAA

Sinapis LR1-1 (7703) ----------------------------------------------------------------------------------------------------

Sinapis LR1-2 (7703) ----------------------------------------------------------------------------------------------------

B. nigra LR1-1 (6575) ----------------------------------------------------------------------------------------------------

B. nigra LR1-2 (6579) ----------------------------------------------------------------------------------------------------

B. carinata LR1-2 (6581) ----------------------------------------------------------------------------------------------------

B. carinata LR1-1 (6581) ----------------------------------------------------------------------------------------------------

B_rapa LRh1a (1622) ----------------------------------------------------------------------------------------------------

B_juncea LRh1a (1623) ----------------------------------------------------------------------------------------------------

B_napus LRh1a (1623) ----------------------------------------------------------------------------------------------------

B_oleracea LRh1a (1584) ----------------------------------------------------------------------------------------------------

10101 10200

Raphanus LR1-1 (8928) ATAACAAAAGATTCCCGACCAAGTATGATCTTATATAATAATAATTCTAGCATTACTCGCAAGAGTGAGTTCACAATGCGGCTTGTCTGCGAACTTGTGG

Raphanus LR1-2 (8928) ATAACAAAAGATTCCCGACCAAGTATGATCTTATATAATAATAATTCTAGCATTACTCGCAAGAGTGAGTTCACAATGCGGCTTGTCTGCGAACTTGTGG

Sinapis LR1-1 (7703) ----------------------------------------------------------------------------------------------------

Sinapis LR1-2 (7703) ----------------------------------------------------------------------------------------------------

B. nigra LR1-1 (6575) ----------------------------------------------------------------------------------------------------

B. nigra LR1-2 (6579) ----------------------------------------------------------------------------------------------------

B. carinata LR1-2 (6581) ----------------------------------------------------------------------------------------------------

B. carinata LR1-1 (6581) ----------------------------------------------------------------------------------------------------

B_rapa LRh1a (1622) ----------------------------------------------------------------------------------------------------

B_juncea LRh1a (1623) ----------------------------------------------------------------------------------------------------

B_napus LRh1a (1623) ----------------------------------------------------------------------------------------------------

B_oleracea LRh1a (1584) ----------------------------------------------------------------------------------------------------

10201 10300

Raphanus LR1-1 (9028) TGCAAAGATCAAGAAGGTAGAGAGAAAGTCGATGAAAACTGCGGTCACAAGTTCTCACAGAAAGGATCGGAACACAACAGTAGTAGACTTAATAGGACCA

Raphanus LR1-2 (9028) TGCAAAGATCAAGAAGGTAGAGAGAAAGTCGATGAAAACTGCGGTCACAAGTTCTCACAGAAAGGATCGGAACACAACAGTAGTAGACTTAATAGGACCA

Sinapis LR1-1 (7703) ----------------------------------------------------------------------------------------------------

Sinapis LR1-2 (7703) ----------------------------------------------------------------------------------------------------

B. nigra LR1-1 (6575) ----------------------------------------------------------------------------------------------------

B. nigra LR1-2 (6579) ----------------------------------------------------------------------------------------------------

B. carinata LR1-2 (6581) ----------------------------------------------------------------------------------------------------

B. carinata LR1-1 (6581) ----------------------------------------------------------------------------------------------------

B_rapa LRh1a (1622) ----------------------------------------------------------------------------------------------------

B_juncea LRh1a (1623) ----------------------------------------------------------------------------------------------------

B_napus LRh1a (1623) ----------------------------------------------------------------------------------------------------

B_oleracea LRh1a (1584) ----------------------------------------------------------------------------------------------------

10301 10400

Raphanus LR1-1 (9128) ACCCACCTCATCAATCTACGTATAACACATCTGAGAGAGTGAAAGGGGTTCCTCCAGGCAGGCTGAAAAGAAAAGGAAAAGGGACAGGTGTACACCAAAG

Raphanus LR1-2 (9128) ACCCACCTCATCAATCTACGTATAACACATCTGAGAGAGTGAAAGGGGTTCCTCCAGGCAGGCTGAAAAGAAAAGGAAAAGGGACAGGTGTACACCAAAG

Sinapis LR1-1 (7703) ----------------------------------------------------------------------------------------------------

Sinapis LR1-2 (7703) ----------------------------------------------------------------------------------------------------

B. nigra LR1-1 (6575) ----------------------------------------------------------------------------------------------------

B. nigra LR1-2 (6579) ----------------------------------------------------------------------------------------------------

B. carinata LR1-2 (6581) ----------------------------------------------------------------------------------------------------

B. carinata LR1-1 (6581) ----------------------------------------------------------------------------------------------------

B_rapa LRh1a (1622) ----------------------------------------------------------------------------------------------------

B_juncea LRh1a (1623) ----------------------------------------------------------------------------------------------------

B_napus LRh1a (1623) ----------------------------------------------------------------------------------------------------

B_oleracea LRh1a (1584) ----------------------------------------------------------------------------------------------------

10401 10500

Raphanus LR1-1 (9228) CGCTGCGCTCCTGCTGAAAAGAAATGAAAGGAATTCTTTTCAAAAATGGGATAGACTACTCTGATAGGTCCGATTCCAGTTGGATAGCCAGATGGGTCCC

Raphanus LR1-2 (9228) CGCTGCGCTCCTGCTGAAAAGAAATGAAAGGAATTCTTTTCAAAAATGGGATAGACTACTCTGATAGGTCCGATTCCAGTTGGATAGCCAGATGGGTCCC

Sinapis LR1-1 (7703) ----------------------------------------------------------------------------------------------------

Sinapis LR1-2 (7703) ----------------------------------------------------------------------------------------------------

B. nigra LR1-1 (6575) ----------------------------------------------------------------------------------------------------

B. nigra LR1-2 (6579) ----------------------------------------------------------------------------------------------------

B. carinata LR1-2 (6581) ----------------------------------------------------------------------------------------------------

B. carinata LR1-1 (6581) ----------------------------------------------------------------------------------------------------

B_rapa LRh1a (1622) ----------------------------------------------------------------------------------------------------

B_juncea LRh1a (1623) ----------------------------------------------------------------------------------------------------

B_napus LRh1a (1623) ----------------------------------------------------------------------------------------------------

B_oleracea LRh1a (1584) ----------------------------------------------------------------------------------------------------

10501 10600

Raphanus LR1-1 (9328) AGTGGAAAAAGTTTCATCCTAGCTCGACTCCAACTCCAACCTCTAGATCTAACTTCTAAAGCTACTAGCTACGTTCAGGGGCGAAGATCCTTAGTGAACT

Raphanus LR1-2 (9328) AGTGGAAAAAGTTTCATCCTAGCTCGACTCCAACTCCAACCTCTAGATCTAACTTCTAAAGCTACTAGCTACGTTCAGGGGCGAAGATCCTTAGTGAACT

Sinapis LR1-1 (7703) ----------------------------------------------------------------------------------------------------

Sinapis LR1-2 (7703) ----------------------------------------------------------------------------------------------------

B. nigra LR1-1 (6575) ----------------------------------------------------------------------------------------------------

B. nigra LR1-2 (6579) ----------------------------------------------------------------------------------------------------

B. carinata LR1-2 (6581) ----------------------------------------------------------------------------------------------------

B. carinata LR1-1 (6581) ----------------------------------------------------------------------------------------------------

B_rapa LRh1a (1622) ----------------------------------------------------------------------------------------------------

B_juncea LRh1a (1623) ----------------------------------------------------------------------------------------------------

B_napus LRh1a (1623) ----------------------------------------------------------------------------------------------------

B_oleracea LRh1a (1584) ----------------------------------------------------------------------------------------------------

10601 10700

Raphanus LR1-1 (9428) CTTTATTCATTCAATTCAACAAGGCGCTCGGGGGGACGAAAGGAGAGCCAATGGCGAAACCAAAGAGAGAGGCGGCCTGGTGGGGACACCACGATACGAT

Raphanus LR1-2 (9428) CTTTATTCATTCAATTCAACAAGGCGCTCGGGGGGACGAAAGGAGAGCCAATGGCGAAACCAAAGAGAGAGGCGGCCTGGTGGGGACACCACGATACGAT

Sinapis LR1-1 (7703) ----------------------------------------------------------------------------------------------------

Sinapis LR1-2 (7703) ----------------------------------------------------------------------------------------------------

B. nigra LR1-1 (6575) ----------------------------------------------------------------------------------------------------

B. nigra LR1-2 (6579) ----------------------------------------------------------------------------------------------------

B. carinata LR1-2 (6581) ----------------------------------------------------------------------------------------------------

B. carinata LR1-1 (6581) ----------------------------------------------------------------------------------------------------

B_rapa LRh1a (1622) ----------------------------------------------------------------------------------------------------

B_juncea LRh1a (1623) ----------------------------------------------------------------------------------------------------

B_napus LRh1a (1623) ----------------------------------------------------------------------------------------------------

B_oleracea LRh1a (1584) ----------------------------------------------------------------------------------------------------

10701 10800

Raphanus LR1-1 (9528) AGGGGATAAGGGCGAAGTTAAGTAAGGGCTCCTCGGATAATCTATATAATCTATCAATAGAAGTCTCTTCACCACATGATGATACCCATGCTCGAAGGGG

Raphanus LR1-2 (9528) AGGGGATAAGGGCGAAGTTAAGTAAGGGCTCCTCGGATAATCTATATAATCTATCAATAGAAGTCTCTTCACCACATGATGATACCCATGCTCGAAGGGG

Sinapis LR1-1 (7703) ----------------------------------------------------------------------------------------------------

Sinapis LR1-2 (7703) ----------------------------------------------------------------------------------------------------

B. nigra LR1-1 (6575) ----------------------------------------------------------------------------------------------------

B. nigra LR1-2 (6579) ----------------------------------------------------------------------------------------------------

B. carinata LR1-2 (6581) ----------------------------------------------------------------------------------------------------

B. carinata LR1-1 (6581) ----------------------------------------------------------------------------------------------------

B_rapa LRh1a (1622) ----------------------------------------------------------------------------------------------------

B_juncea LRh1a (1623) ----------------------------------------------------------------------------------------------------

B_napus LRh1a (1623) ----------------------------------------------------------------------------------------------------

B_oleracea LRh1a (1584) ----------------------------------------------------------------------------------------------------

10801 10900

Raphanus LR1-1 (9628) AACCTTCAAAGCAGGATTTGAGTTCTATAGCTATACAACTCTGGGGAATCGGCGTGCAGGAGCGTACTGCAGAACTATGACCCATACAGTGGAAGCTCTG

Raphanus LR1-2 (9628) AACCTTCAAAGCAGGATTTGAGTTCTATAGCTATACAACTCTGGGGAATCGGCGTGCAGGAGCGTACTGCAGAACTATGACCCATACAGTGGAAGCTCTG

Sinapis LR1-1 (7703) ----------------------------------------------------------------------------------------------------

Sinapis LR1-2 (7703) ----------------------------------------------------------------------------------------------------

B. nigra LR1-1 (6575) ----------------------------------------------------------------------------------------------------

B. nigra LR1-2 (6579) ----------------------------------------------------------------------------------------------------

B. carinata LR1-2 (6581) ----------------------------------------------------------------------------------------------------

B. carinata LR1-1 (6581) ----------------------------------------------------------------------------------------------------

B_rapa LRh1a (1622) ----------------------------------------------------------------------------------------------------

B_juncea LRh1a (1623) ----------------------------------------------------------------------------------------------------

B_napus LRh1a (1623) ----------------------------------------------------------------------------------------------------

B_oleracea LRh1a (1584) ----------------------------------------------------------------------------------------------------

10901

Raphanus LR1-1 (9728) GTCCC

Raphanus LR1-2 (9728) GTCCC

Sinapis LR1-1 (7703) -----

Sinapis LR1-2 (7703) -----

B. nigra LR1-1 (6575) -----

B. nigra LR1-2 (6579) -----

B. carinata LR1-2 (6581) -----

B. carinata LR1-1 (6581) -----

B_rapa LRh1a (1622) -----

B_juncea LRh1a (1623) -----

B_napus LRh1a (1623) -----

B_oleracea LRh1a (1584) -----

1 100

Raphanus LR1-1 (1) ----------------------------------------------------------------------------------------------------

Raphanus LR1-2 (1) ----------------------------------------------------------------------------------------------------

Sinapis LR1-1 (1) TGTGCTTGTGCTGCAGTTTAGAATGCTGATTCCTGGGTGGGTAGTTCCTACTCTTGCTTCCCTTGGTTTTAGCAGGTATTTGTTTATAGCTTCGGTAGTT

Sinapis LR1-2 (1) TGTGCTTGTGCTGCAGTTTAGAATGCTGATTCCTGGGTGGGTAGTTCCTACTCTTGCTTCCCTTGGTTTTAGCAGGTATTTGTTTATAGCTTCGGTAGTT

B. nigra LR1-1 (1) ----------------------------------------------------------------------------------------------------

B. nigra LR1-2 (1) ----------------------------------------------------------------------------------------------------

B. carinata LR1-1 (1) ----------------------------------------------------------------------------------------------------

B. carinata LR1-2 (1) ----------------------------------------------------------------------------------------------------

B_rapa BnLRh1b (1) ----------------------------------------------------------------------------------------------------

B_juncea BnLRh1b (1) ----------------------------------------------------------------------------------------------------

B_napus BnLRh1b (1) ----------------------------------------------------------------------------------------------------

B_oleracea BnLRh1b (1) ----------------------------------------------------------------------------------------------------

101 200

Raphanus LR1-1 (1) ----------------------------------------------------------------------------------------------------

Raphanus LR1-2 (1) ----------------------------------------------------------------------------------------------------

Sinapis LR1-1 (101) AACCAACTATTCCCTTTTCAGCACACTCTTTGGCGTGCGATAATAGTAAACTTTTAGGAATCCCACACCAAGTGAACAGAGTTATCGGCTGATACTTTCC

Sinapis LR1-2 (101) AACCAACTATTCCCTTTTCAGCACACTCTTTGGCGTGCGATAATAGTAAACTTTTAGGAATCCCACACCAAGTGAACAGAGTTATCGGCTGATACTTTCC

B. nigra LR1-1 (1) ----------------------------------------------------------------------------------------------------

B. nigra LR1-2 (1) ----------------------------------------------------------------------------------------------------

B. carinata LR1-1 (1) ----------------------------------------------------------------------------------------------------

B. carinata LR1-2 (1) ----------------------------------------------------------------------------------------------------

B_rapa BnLRh1b (1) ----------------------------------------------------------------------------------------------------

B_juncea BnLRh1b (1) ----------------------------------------------------------------------------------------------------

B_napus BnLRh1b (1) ----------------------------------------------------------------------------------------------------

B_oleracea BnLRh1b (1) ----------------------------------------------------------------------------------------------------

201 300

Raphanus LR1-1 (1) -----------------------------------------------AAGAAGAAGGATGGAGCAGAAAGATAGAAAGATCAGTTGCTGGAAATCAAATA

Raphanus LR1-2 (1) -----------------------------------------------AAGAAGAAGGATGGAGCAGAAAGATAGAAAGATCAGTTGCTGGAAATCAAATA

Sinapis LR1-1 (201) TTGTTCCTAGGGTTGAGCAGAAGTTGGTTGACTAGCTACTGAAGTCAGCACACTCCTCTGCTTTTCCGATGCTTTGACCAGCTATTTTCCTAACCAGAGC

Sinapis LR1-2 (201) TTGTTCCTAGGGTTGAGCAGAAGTTGGTTGACTAGCTACTGAAGTCAGCACACTCCTCTGCTTTTCCGATGCTTTGACCAGCTATTTTCCTAACCAGAGC

B. nigra LR1-1 (1) ----------------------------------------------------------------------------------------------------

B. nigra LR1-2 (1) ----------------------------------------------------------------------------------------------------

B. carinata LR1-1 (1) ----------------------------------------------------------------------------------------------------

B. carinata LR1-2 (1) ----------------------------------------------------------------------------------------------------

B_rapa BnLRh1b (1) ----------------------------------------------------------------------------------------------------

B_juncea BnLRh1b (1) ----------------------------------------------------------------------------------------------------

B_napus BnLRh1b (1) ----------------------------------------------------------------------------------------------------

B_oleracea BnLRh1b (1) ----------------------------------------------------------------------------------------------------

301 400

Raphanus LR1-1 (54) TGTAAATAGTCGAGTTATTGCATTCCTCTCACAAACTATCAATTTCATAAGAGAAGAAAGATCGTTTTTCGAAACTATCAATTTCATAAGAGAAGAAAGA

Raphanus LR1-2 (54) TGTAAATAGTCGAGTTATTGCATTCCTCTCACAAACTATCAATTTCATAAGAGAAGAAAGATCGTTTTTCGAAACTATCAATTTCATAAGAGAAGAAAGA

Sinapis LR1-1 (301) TAATCCTCTGTGCTGTAATGGAGAAGAAGGAGAACCGAAGATATCAAGCTTGGCTGCGCTGCCCGTCGCATCGGACTCCCAACGGCTAAGAGCGGGAACC

Sinapis LR1-2 (301) TAATCCTCTGTGCTGTAATGGAGAAGAAGGAGAACCGAAGATATCAAGCTTGGCTGCGCTGCCCGTCGCATCGGACTCCCAACGGCTAAGAGCGGGAACC

B. nigra LR1-1 (1) ----------------------------------------------------------------------------------------------------

B. nigra LR1-2 (1) ----------------------------------------------------------------------------------------------------

B. carinata LR1-1 (1) ----------------------------------------------------------------------------------------------------

B. carinata LR1-2 (1) ----------------------------------------------------------------------------------------------------

B_rapa BnLRh1b (1) ----------------------------------------------------------------------------------------------------

B_juncea BnLRh1b (1) ----------------------------------------------------------------------------------------------------

B_napus BnLRh1b (1) ----------------------------------------------------------------------------------------------------

B_oleracea BnLRh1b (1) ----------------------------------------------------------------------------------------------------

401 500

Raphanus LR1-1 (154) TCGTTTTTCGAAACTATCAATTTCATAAGAGAAGAAAGATCGTTTTTCGAAAAGAAAGAAGGTTTTGATTCGAGGCGGATCCCTTTTTTCTTTGCCTTTA

Raphanus LR1-2 (154) TCGTTTTTCGAAACTATCAATTTCATAAGAGAAGAAAGATCGTTTTTCGAAAAGAAAGAAGGTTTTGATTCGAGGCGGATCCCTTTTTTCTTTGCCTTTA

Sinapis LR1-1 (401) ATGATTAGCTTAATGCCTTTCGGCTATAGGACATTAGACTTCTACCGGCTACCGGGAAAAAGATTAGACTAGATCAAAGGACTAGATCGATCAGCAGCCG

Sinapis LR1-2 (401) ATGATTAGCTTAATGCCTTTCGGCTATAGGACATTAGACTTCTACCGGCTACCGGGAAAAAGATTAGACTAGATCAAAGGACTAGATCGATCAGCAGCCG

B. nigra LR1-1 (1) ----------------------------------------------------------------------------------------------------

B. nigra LR1-2 (1) ----------------------------------------------------------------------------------------------------

B. carinata LR1-1 (1) ----------------------------------------------------------------------------------------------------

B. carinata LR1-2 (1) ----------------------------------------------------------------------------------------------------

B_rapa BnLRh1b (1) ----------------------------------------------------------------------------------------------------

B_juncea BnLRh1b (1) ----------------------------------------------------------------------------------------------------

B_napus BnLRh1b (1) ----------------------------------------------------------------------------------------------------

B_oleracea BnLRh1b (1) ----------------------------------------------------------------------------------------------------

501 600

Raphanus LR1-1 (254) CGAGTAAGAAAGTGGTTACGCTCCGCTGGGGAGCCGGAACTGTAAATTCCTACTGTGGTTCGAGTCCACAAACCACTGAGAGCTCTGGCATCGGTTCAGG

Raphanus LR1-2 (254) CGAGTAAGAAAGTGGTTACGCTCCGCTGGGGAGCCGGAACTGTAAATTCCTACTGTGGTTCGAGTCCACAAACCACTGAGAGCTCTGGCATCGGTTCAGG

Sinapis LR1-1 (501) TAGCTGCAGTAGAAAAAGCAGTAGTTGGAGTTGGTACTTCAACCGGTTCTTTTACAGTCCCACCTTCATAAGGAAGAACTGCCTTGAAGGGTAAGGCAGG

Sinapis LR1-2 (501) TAGCTGCAGTAGAAAAAGCAGTAGTTGGAGTTGGTACTTCAACCGGTTCTTTTACAGTCCCACCTTCATAAGGAAGAACTGCCTTGAAGGGTAAGGCAGG

B. nigra LR1-1 (1) ----------------------------------------------------------------------------------------------------

B. nigra LR1-2 (1) ----------------------------------------------------------------------------------------------------

B. carinata LR1-1 (1) ----------------------------------------------------------------------------------------------------

B. carinata LR1-2 (1) ----------------------------------------------------------------------------------------------------

B_rapa BnLRh1b (1) ----------------------------------------------------------------------------------------------------

B_juncea BnLRh1b (1) ----------------------------------------------------------------------------------------------------

B_napus BnLRh1b (1) ----------------------------------------------------------------------------------------------------

B_oleracea BnLRh1b (1) ----------------------------------------------------------------------------------------------------

601 700

Raphanus LR1-1 (354) CTAAATCCTGAAGAAAGCTAGAAAGCGCTGTTTGATGAGCCTGCGTCCGATTTGTGAGTTGGTTAGGTAAAGGCTGACCAAGCCAATGATGCTTAGCTGC

Raphanus LR1-2 (354) CTAAATCCTGAAGAAAGCTAGAAAGCGCTGTTTGATGAGCCTGCGTCCGATTTGTGAGTTGGTTAGGTAAAGGCTGACCAAGCCAATGATGCTTAGCTGC

Sinapis LR1-1 (601) TCAAAAGAGTGGGCATCTTTACTACCTATGGCTAACTCAAAAAAATCTGAGAGGGGAGGTTGCTCTGCTCTGGATGCACCGGTCAGAACGGGGAAAGCTG

Sinapis LR1-2 (601) TCAAAAGAGTGGGCATCTTTACTACCTATGGCTAACTCAAAAAAATCTGAGAGGGGAGGTTGCTCTGCTCTGGATGCACCGGTCAGAACGGGGAAAGCTG

B. nigra LR1-1 (1) ----------------------------------------------------------------------------------------------------

B. nigra LR1-2 (1) ----------------------------------------------------------------------------------------------------

B. carinata LR1-1 (1) ----------------------------------------------------------------------------------------------------

B. carinata LR1-2 (1) ----------------------------------------------------------------------------------------------------

B_rapa BnLRh1b (1) ----------------------------------------------------------------------------------------------------

B_juncea BnLRh1b (1) ----------------------------------------------------------------------------------------------------

B_napus BnLRh1b (1) ----------------------------------------------------------------------------------------------------

B_oleracea BnLRh1b (1) ----------------------------------------------------------------------------------------------------

701 800

Raphanus LR1-1 (454) CCAGTCGTGCCGAGGAATTCCCATCCGACCAGAGGAGGGAAGAGAGTGACTAAGCAGCAGCTCCACTTGTCGCGTACTTCTTTAGCTGCACCGTCATCGC

Raphanus LR1-2 (454) CCAGTCGTGCCGAGGAATTCCCATCCGACCAGAGGAGGGAAGAGAGTGACTAAGCAGCAGCTCCACTTGTCGCGTACTTCTTTAGCTGCACCGTCATCGC

Sinapis LR1-1 (701) CTCTTAGAGCTATCTCTTTCCGATCTAGGCAGATGGTTGAATCTAATGCGAGTAGCACTAGGCCTAGAGCGGAATATTAGGTAGTACGAGTTGCTATATT

Sinapis LR1-2 (701) CTCTTAGAGCTATCTCTTTCCGATCTAGGCAGATGGTTGAATCTAATGCGAGTAGCACTAGGCCTAGAGCGGAATATTAGGTAGTACGAGTTGCTATATT

B. nigra LR1-1 (1) ----------------------------------------------------------------------------------------------------

B. nigra LR1-2 (1) ----------------------------------------------------------------------------------------------------

B. carinata LR1-1 (1) ----------------------------------------------------------------------------------------------------

B. carinata LR1-2 (1) ----------------------------------------------------------------------------------------------------

B_rapa BnLRh1b (1) ----------------------------------------------------------------------------------------------------

B_juncea BnLRh1b (1) ----------------------------------------------------------------------------------------------------

B_napus BnLRh1b (1) ----------------------------------------------------------------------------------------------------

B_oleracea BnLRh1b (1) ----------------------------------------------------------------------------------------------------

801 900

Raphanus LR1-1 (554) CGGCCGGACAAACCCTTCCAACAAATGGGGAGTGGGCCAAAGGAACACGACACATCCAGTGAAGAGATCCCGGACAGGGAAGTCAGAAGGTCTGCAAGCC

Raphanus LR1-2 (554) CGGCCGGACAAACCCTTCCAACAAATGGGGAGTGGGCCAAAGGAACACGACACATCCAGTGAAGAGATCCCGGACAGGGAAGTCAGAAGGTCTGCAAGCC

Sinapis LR1-1 (801) TTTCCATCCCCCTTCGGGAAGAAACTCTCTTTGACTTTTGAGAAGATAGACCCAAGTAGCCCTTGAATGATCATCCACTATGGTTCAAAAATATCGAAAA

Sinapis LR1-2 (801) TTTCCATCCCCCTTCGGGAAGAAACTCTCTTTGACTTTTGAGAAGATAGACCCAAGTAGCCCTTGAATGATCATCCACTATGGTTCAAAAATATCGAAAA

B. nigra LR1-1 (1) ----------------------------------------------------------------------------------------------------

B. nigra LR1-2 (1) ----------------------------------------------------------------------------------------------------

B. carinata LR1-1 (1) ----------------------------------------------------------------------------------------------------

B. carinata LR1-2 (1) ----------------------------------------------------------------------------------------------------

B_rapa BnLRh1b (1) ----------------------------------------------------------------------------------------------------

B_juncea BnLRh1b (1) ----------------------------------------------------------------------------------------------------

B_napus BnLRh1b (1) ----------------------------------------------------------------------------------------------------

B_oleracea BnLRh1b (1) ----------------------------------------------------------------------------------------------------

901 1000

Raphanus LR1-1 (654) TCGTCTTCGCCCCTGCTTTAGCTGCACTTGGTGCGTAAGAGGGA----GACCCGGTCGCTCAGATACAGACAGCAGCTCATTTTACGCTTAAACACATCC

Raphanus LR1-2 (654) TCGTCTTCGCCCCTGCTTTAGCTGCACTTGGTGCGTAAGAGGGA----GACCCGGTCGCTCAGATACAGACAGCAGCTCATTTTACGCTTAAACACATCC

Sinapis LR1-1 (901) CCTTCTGTTCTGTGGTTTCAACTGAAAAAGGGCCCCAAATGTCAATGTGAATCAGATCAAAAGGTTCATCACAAATGTTATTATGAGATTTAAAAGGTAA

Sinapis LR1-2 (901) CCTTCTGTTCTGTGGTTTCAACTGAAAAAGGGCCCCAAATGTCAATGTGAATCAGATCAAAAGGTTCATCACAAATGTTATTATGAGATTTAAAAGGTAA

B. nigra LR1-1 (1) ----------------------------------------------------------------------------------------------------

B. nigra LR1-2 (1) ----------------------------------------------------------------------------------------------------

B. carinata LR1-1 (1) ----------------------------------------------------------------------------------------------------

B. carinata LR1-2 (1) ----------------------------------------------------------------------------------------------------

B_rapa BnLRh1b (1) ----------------------------------------------------------------------------------------------------

B_juncea BnLRh1b (1) ----------------------------------------------------------------------------------------------------

B_napus BnLRh1b (1) ----------------------------------------------------------------------------------------------------

B_oleracea BnLRh1b (1) ----------------------------------------------------------------------------------------------------

1001 1100

Raphanus LR1-1 (750) CAGGGAATTACAGGAATACGGGCTCCGCCTAG-------CTACCTGATCCCATCATGAATAGGAATTACCAGCGAACCAAGAGAGATAGA---TTCAACA

Raphanus LR1-2 (750) CAGGGAATTACAGGAATACGGGCTCCGCCTAG-------CTACCTGATCCCATCATGAATAGGAATTACCAGCGAACCAAGAGAGATAGA---TTCAACA

Sinapis LR1-1 (1001) GTGTTTTTGTTTAGCCAAAGGACAGATTTTACAAATGGTCTGATTGACCTTTTTATTCTTATGAGTAGGGAGTCAATCTGAAAGGATAGCAGTTTTAGAA

Sinapis LR1-2 (1001) GTGTTTTTGTTTAGCCAAAGGACAGATTTTACAAATGGTCTGATTGACCTTTTTATTCTTATGAGTAGGGAGTCAATCTGAAAGGATAGCAGTTTTAGAA

B. nigra LR1-1 (1) ------------------------------------------------------------------------------------------------AGAA

B. nigra LR1-2 (1) ------------------------------------------------------------------------------------------------AGAA

B. carinata LR1-1 (1) ------------------------------------------------------------------------------------------------AGAA

B. carinata LR1-2 (1) ------------------------------------------------------------------------------------------------AGAA

B_rapa BnLRh1b (1) ----------------------------------------------------------------------------------------------------

B_juncea BnLRh1b (1) ----------------------------------------------------------------------------------------------------

B_napus BnLRh1b (1) ----------------------------------------------------------------------------------------------------

B_oleracea BnLRh1b (1) ----------------------------------------------------------------------------------------------------

1101 1200

Raphanus LR1-1 (840) GAGGAGAAGGGGTGGCGTGCTTTAGCGACACCTTCAAGACATCCAGGAGTGATCTAGACGAGGTGGGACATGCCGGC-TAGAGTACATGCTTCAACTGGA

Raphanus LR1-2 (840) GAGGAGAAGGGGTGGCGTGCTTTAGCGACACCTTCAAGACATCCAGGAGTGATCTAGACGAGGTGGGACATGCCGGC-TAGAGTACATGCTTCAACTGGA

Sinapis LR1-1 (1101) GAAGGATGGAGCAGAAAGATAGAAAGATCAGTTGCTGGAAATCAAATATGTAAATAGTCGAGTTATTGCATTCCTCT-CACAAACTATCAATTTCATAAG

Sinapis LR1-2 (1101) GAAGGATGGAGCAGAAAGATAGAAAGATCAGTTGCTGGAAATCAAATATGTAAATAGTCGAGTTATTGCATTCCTCT-CACAAACTATCAATTTCATAAG

B. nigra LR1-1 (5) GAAGGATGGAGCAGAAAGATAGAAAGATCAGTTGCTGGAAATCAAATATGTAAATAGTCGAGTTATTGCATTCCTCTTCACAAACTATCAATTTCATAAG

B. nigra LR1-2 (5) GAAGGATGGAGCAGAAAGATAGAAAGATCAGTTGCTGGAAATCAAATATGTAAATAGTCGAGTTATTGCATTCCTCT-CACAAACTATCAATTTCATAAG

B. carinata LR1-1 (5) GAAGGATGGAGCAGAAAGATAGAAAGATCAGTTGCTGGAAATCAAATATGTAAATAGTCGAGTTATTGCATTCCTCT-CACAAACTATCAATTTCATAAG

B. carinata LR1-2 (5) GAAGGATGGAGCAGAAAGATAGAAAGATCAGTTGCTGGAAATCAAATATGTAAATAGTCGAGTTATTGCATTCCTCT-CACAAACTATCAATTTCATAAG

B_rapa BnLRh1b (1) ----------------------------------------------------------------------------------------------------

B_juncea BnLRh1b (1) ----------------------------------------------------------------------------------------------------

B_napus BnLRh1b (1) ----------------------------------------------------------------------------------------------------

B_oleracea BnLRh1b (1) ----------------------------------------------------------------------------------------------------

1201 1300

Raphanus LR1-1 (939) ACATCGCTTCGCTACTCTTCCCTCCCTACCCCTACGGTCGTACACTCTGTTGATAGTTCGC-------------------------------CAATGGCT

Raphanus LR1-2 (939) ACATCGCTTCGCTACTCTTCCCTCCCTACCCCTACGGTCGTACACTCTGTTGATAGTTCGC-------------------------------CAATGGCT

Sinapis LR1-1 (1200) AGAAGAAAGATCGTTTTTCGAAACTAT----CAATTTCATAAGAGAAGAAAGATCGTTTTTCGAAACTATCAATTTCATAAGAGAAGAAAGATCGTTTTT

Sinapis LR1-2 (1200) AGAAGAAAGATCGTTTTTCGAAACTAT----CAATTTCATAAGAGAAGAAAGATCGTTTTTCGAAACTATCAATTTCATAAGAGAAGAAAGATCGTTTTT

B. nigra LR1-1 (105) AGAAGAAAGATCGTTTTTCGAAACTAT----CAATTTCATAAGAGAAGAAAGATCGTTT---------------------------------T------T

B. nigra LR1-2 (104) AGAAGAAAGATCGTTTTTAGAAAAGAAAGAAGGTTTTGATTCGAGGAGGCTGATCGTTT---------------------------------T------T

B. carinata LR1-1 (104) AGAAGAAAGATCGTTTTTCGAAACTAT----CAATTTCATAAGAGAAGAAAGATCGTTT---------------------------------T------T

B. carinata LR1-2 (104) AGAAGAAAGATCGTTTTTCGAAACTAT----CAATTTCATAAGAGAAGAAAGATCGTTT---------------------------------T------T

B_rapa BnLRh1b (1) ----------------------------------------------------------------------------------------------------

B_juncea BnLRh1b (1) ----------------------------------------------------------------------------------------------------

B_napus BnLRh1b (1) ----------------------------------------------------------------------------------------------------

B_oleracea BnLRh1b (1) ----------------------------------------------------------------------------------------------------

1301 1400

Raphanus LR1-1 (1008) CACAACCAGACAATCATAGTATGTTCGTTCGTTCACTTCGTTCTCTCTCTCCCCTTCTCCCGTTAGCTTGTTCCCCTCCTCCCTTCCCAACCTTCCCAGC

Raphanus LR1-2 (1008) CACAACCAGACAATCATAGTATGTTCGTTCGTTCACTTCGTTCTCTCTCTCCCCTTCTCCCGTTAGCTTGTTCCCCTCCTCCCTTCCCAACCTTCCCAGC

Sinapis LR1-1 (1296) CGAAAAGAAAGAAGGTTTTGATTCGAGGCGGATCCCTTTTTTCTTTGCCTTTACGAGTAAGAAAGTGGTTACGCTCCACTGGGGAGCCGGAACTGTAAAT

Sinapis LR1-2 (1296) CGAAAAGAAAGAAGGTTTTGATTCGAGGCGGATCCCTTTTTTCTTTGCCTTTACGAGTAAGAAAGTGGTTACGCTCCACTGGGGAGCCGGAACTGTAAAT

B. nigra LR1-1 (162) AGAAAAGAAAGAAGGTTTTGATTCGAGGCGGATCCCTTTTTTCTTTGCCTTTACGAGTAAGAAAGTGGTTACGCTCCGCTGGGGAGCCGGAACTGTAAAT

B. nigra LR1-2 (165) AGAAAAGAAAGAAGGTTTTGATTCGAGGCGGATCCCTTTTTTCTTTGCCTTTACGAGTAAGAAAGTGGTTACGCTCCGCTGGGGAGCCGGAACTGTAAAT

B. carinata LR1-1 (161) AGAAAAGAAAGAAGGTTTTGATTCGAGGCGGATCCCTTTTTTCTTTGCCTTTACGAGTAAGAAAGTGGTTACGCTCCGCTGGGGAGCCGGAACTGTAAAT

B. carinata LR1-2 (161) AGAAAAGAAAGAAGGTTTTGATTCGAGGCGGATCCCTTTTTTCTTTGCCTTTACGAGTAAGAAAGTGGTTACGCTCCGCTGGGGAGCCGGAACTGTAAAT

B_rapa BnLRh1b (1) ----------------------------------------------------------------------------------------------------

B_juncea BnLRh1b (1) ----------------------------------------------------------------------------------------------------

B_napus BnLRh1b (1) ----------------------------------------------------------------------------------------------------

B_oleracea BnLRh1b (1) ----------------------------------------------------------------------------------------------------

1401 1500

Raphanus LR1-1 (1108) CCTTCCTCCAAGAGTAGTTACGCCTTTTCCGTCAGTGGAGAGAGCGAGCAACGACCTGTGAGCGACCGTAGCTCCCTCTGCAAGTGGTAAGGCGCAGTTC

Raphanus LR1-2 (1108) CCTTCCTCCAAGAGTAGTTACGCCTTTTCCGTCAGTGGAGAGAGCGAGCAACGACCTGTGAGCGACCGTAGCTCCCTCTGCAAGTGGTAAGGCGCAGTTC

Sinapis LR1-1 (1396) TCCTACTGTGGTTCGAGTCCACAAACCACTGAGAGCTCTGGCATCGGTTCAGGCTAAATCCTGAAGAAAGCTAGAAAGCGCTGTTTGATGAGCCTGCGTC

Sinapis LR1-2 (1396) TCCTACTGTGGTTCGAGTCCACAAACCACTGAGAGCTCTGGCATCGGTTCAGGCTAAATCCTGAAGAAAGCTAGAAAGCGCTGTTTGATGAGCCTGCGTC

B. nigra LR1-1 (262) TCCTACTGTGGTTCGAGTCCACAAACCACTGAGAGCTCTGGCATCGGTTCAGGCTAAATCCTGAAGAAAGCTAGAAAGCGCTGTTTGATGAGCCTGCGTC

B. nigra LR1-2 (265) TCCTACTGTGGTTCGAGTCCACAAACCACTGAGAGCTCTGGCATCGGTTCAGGCTAAATCCTGAAGAAAGCTAGAAAGCGCTGTTTGATGAGCCTGCGTC

B. carinata LR1-1 (261) TCCTACTGTGGTTCGAGTCCACAAACCACTGAGAGCTCTGGCATCGGTTCAGGCTAAATCCTGAAGAAAGCTAGAAAGCGCTGTTTGATGAGCCTGCGTC

B. carinata LR1-2 (261) TCCTACTGTGGTTCGAGTCCACAAACCACTGAGAGCTCTGGCATCGGTTCAGGCTAAATCCTGAAGAAAGCTAGAAAGCGCTGTTTGATGAGCCTGCGTC

B_rapa BnLRh1b (1) ----------------------------------------------------------------------------------------------------

B_juncea BnLRh1b (1) ----------------------------------------------------------------------------------------------------

B_napus BnLRh1b (1) ----------------------------------------------------------------------------------------------------

B_oleracea BnLRh1b (1) ----------------------------------------------------------------------------------------------------

1501 1600

Raphanus LR1-1 (1208) ACCCCCTATCGAACGGAGGAAGATCGCTGTTGATGTCATGACTAACTTCTTGATTCTTTGATGAGAGAGGCGTGCGTGTGAAATGTCTGATTCATGGCTT

Raphanus LR1-2 (1208) ACCCCCTATCGAACGGAGGAAGATCGCTGTTGATGTCATGACTAACTTCTTGATTCTTTGATGAGAGAGGCGTGCGTGTGAAATGTCTGATTCATGGCTT

Sinapis LR1-1 (1496) CGATTTGTGAGTTGGTTAGGTAAAGGCTGACCAAGCCAATGATGCTTAGCTGCCCAGTCGTGCCGAGGAATTCCCATCCGACCAGAGGAGGGAAGAGAGT

Sinapis LR1-2 (1496) CGATTTGTGAGTTGGTTAGGTAAAGGCTGACCAAGCCAATGATGCTTAGCTGCCCAGTCGTGCCGAGGAATTCCCATCCGACCAGAGGAGGGAAGAGAGT

B. nigra LR1-1 (362) CGATTTGTGAGTTGGTTAGGTAAAGGCTGACCAAGCCAATGATGCTTAGCTGCCCAGTCGTGCCGAGGAATTCCCATCCGACCAGAGGAGGGAAGAGAGT

B. nigra LR1-2 (365) CGATTTGTGAGTTGGTTAGGTAAAGGCTGACCAAGCCAATGATGCTTAGCTGCCCAGTCGTGCCGAGGAATTCCCATCCGACCAGAGGAGGGAAGAGAGT

B. carinata LR1-1 (361) CGATTTGTGAGTTGGTTAGGTAAAGGCTGACCAAGCCAATGATGCTTAGCTGCCCAGTCGTGCCGAGGAATTCCCATCCGACCAGAGGAGGGAAGAGAGT

B. carinata LR1-2 (361) CGATTTGTGAGTTGGTTAGGTAAAGGCTGACCAAGCCAATGATGCTTAGCTGCCCAGTCGTGCCGAGGAATTCCCATCCGACCAGAGGAGGGAAGAGAGT

B_rapa BnLRh1b (1) ----------------------------------------------------------------------------------------------------

B_juncea BnLRh1b (1) ----------------------------------------------------------------------------------------------------

B_napus BnLRh1b (1) ----------------------------------------------------------------------------------------------------

B_oleracea BnLRh1b (1) ----------------------------------------------------------------------------------------------------

1601 1700

Raphanus LR1-1 (1308) GGTTAACGAGATGTCCCAACTGGTAC-TGGAGCACACCCGTCTGGTTCGTACCATCATTGGCTTGTTCATCCTTTACCTAAGCCTAATCTTCTTCTTCAT

Raphanus LR1-2 (1308) GGTTAACGAGATGTCCCAACTGGTAC-TGGAGCACACCCGTCTGGTTCGTACCATCATTGGCTTGTTCATCCTTTACCTAAGCCTAATCTTCTTCTTCAT

Sinapis LR1-1 (1596) GACTAAGCAGCAGCTCCACTTGTCGCGTACTTCTTTAGCTGCACCGTCATCGCCGGCCGGACAAACCCTTCCAACAAATGGGGAGTGGGCCAAAGGAACA

Sinapis LR1-2 (1596) GACTAAGCAGCAGCTCCACTTGTCGCGTACTTCTTTAGCTGCACCGTCATCGCCGGCCGGACAAACCCTTCCAACAAATGGGGAGTGGGCCAAAGGAACA

B. nigra LR1-1 (462) GACTAAGCAGCAGCTCCACTTGTCGCGTACTTCTTTAGCTGCACCGTCATCGCCGGCCGGACAAACCCTTCCAACAAATGGGGAGTGGGCCAAAGGAACA

B. nigra LR1-2 (465) GACTAAGCAGCAGCTCCACTTGTCGCGTACTTCTTTAGCTGCACCGTCATCGCCGGCCGGACAAACCCTTCCAACAAATGGGGAGTGGGCCAAAGGAACA

B. carinata LR1-1 (461) GACTAAGCAGCAGCTCCACTTGTCGCGTACTTCTTTAGCTGCACCGTCATCGCCGGCCGGACAAACCCTTCCAACAAATGGGGAGTGGGCCAAAGGAACA

B. carinata LR1-2 (461) GACTAAGCAGCAGCTCCACTTGTCGCGTACTTCTTTAGCTGCACCGTCATCGCCGGCCGGACAAACCCTTCCAACAAATGGGGAGTGGGCCAAAGGAACA

B_rapa BnLRh1b (1) ----------------------------------------------------------------------------------------------------

B_juncea BnLRh1b (1) ----------------------------------------------------------------------------------------------------

B_napus BnLRh1b (1) ----------------------------------------------------------------------------------------------------

B_oleracea BnLRh1b (1) ----------------------------------------------------------------------------------------------------

1701 1800

Raphanus LR1-1 (1407) AGCACACTCTGCTACAGCACACTACGCTTCTGTGCTGCTCAGTAGTGACTGCTAGGGAGTTAATCACACCAGGCGGGCTTGCTTCGCTAGAAAAGAATTC

Raphanus LR1-2 (1407) AGCACACTCTGCTACAGCACACTACGCTTCTGTGCTGCTCAGTAGTGACTGCTAGGGAGTTAATCACACCAGGCGGGCTTGCTTCGCTAGAAAAGAATTC

Sinapis LR1-1 (1696) CGACACATCCAGTGAAGAGATCCCGGACAGGGAAGTCAGAAGGTCTGCAAGCCTCGTCTTCGCCCCTGCTTTAGCTGCACTTGGTGCGTAAGAGGGAGAC

Sinapis LR1-2 (1696) CGACACATCCAGTGAAGAGATCCCGGACAGGGAAGTCAGAAGGTCTGCAAGCCTCGTCTTCGCCCCTGCTTTAGCTGCACTTGGTGCGTAAGAGGGAGAC

B. nigra LR1-1 (562) CGACACATCCAGTGAAGAGATCCCGGACAGGGAAGTCAGAAGGTCTGCAAGCCTCGTCTTCGCCCCTGCTTTAGCTGCACTTGGTGCGTAAGAGGGAGAC

B. nigra LR1-2 (565) CGACACATCCAGTGAAGAGATCCCGGACAGGGAAGTCAGAAGGTCTGCAAGCCTCGTCTTCGCCCCTGCTTTAGCTGCACTTGGTGCGTAAGAGGGAGAC

B. carinata LR1-1 (561) CGACACATCCAGTGAAGAGATCCCGGACAGGGAAGTCAGAAGGTCTGCAAGCCTCGTCTTCGCCCCTGCTTTAGCTGCACTTGGTGCGTAAGAGGGAGAC

B. carinata LR1-2 (561) CGACACATCCAGTGAAGAGATCCCGGACAGGGAAGTCAGAAGGTCTGCAAGCCTCGTCTTCGCCCCTGCTTTAGCTGCACTTGGTGCGTAAGAGGGAGAC

B_rapa BnLRh1b (1) ----------------------------------------------------------------------------------------------------

B_juncea BnLRh1b (1) ----------------------------------------------------------------------------------------------------

B_napus BnLRh1b (1) ----------------------------------------------------------------------------------------------------

B_oleracea BnLRh1b (1) ----------------------------------------------------------------------------------------------------

1801 1900

Raphanus LR1-1 (1507) CACTAGTGTGTGCTGCTGAGAGTGAACTATGTTACTCGGAACAATATCTGAAAGGAAGCTTAAGGAAAGGCCTTAGTATTCTTTCTTCAAAGGCGTTCCC

Raphanus LR1-2 (1507) CACTAGTGTGTGCTGCTGAGAGTGAACTATGTTACTCGGAACAATATCTGAAAGGAAGCTTAAGGAAAGGCCTTAGTATTCTTTCTTCAAAGGCGTTCCC

Sinapis LR1-1 (1796) CCGGTCGCTCAGATACAGACAGCAGCTCATTTTACGCTTAAACACATCCCAGGGAATTACAGGAATACGGGCTCCGCCTAGCTACCTGATCCCATCATGA

Sinapis LR1-2 (1796) CCGGTCGCTCAGATACAGACAGCAGCTCATTTTACGCTTAAACACATCCCAGGGAATTACAGGAATACGGGCTCCGCCTAGCTACCTGATCCCATCATGA

B. nigra LR1-1 (662) CCGGTCGCTCAGATACAGACAGCAGCTCATTTTACGCTTAAACACATCCCAGGGAATTACAGGAATACGGGCTCCGCCTAGCTACCTGATCCCATCATGA

B. nigra LR1-2 (665) CCGGTCGCTCAGATACAGACAGCAGCTCATTTTACGCTTAAACACATCCCAGGGAATTACAGGAATACGGGCTCCGCCTAGCTACCTGATCCCATCATGA

B. carinata LR1-1 (661) CCGGTCGCTCAGATACAGACAGCAGCTCATTTTACGCTTAAACACATCCCAGGGAATTACAGGAATACGGGCTCCGCCTAGCTACCTGATCCCATCATGA

B. carinata LR1-2 (661) CCGGTCGCTCAGATACAGACAGCAGCTCATTTTACGCTTAAACACATCCCAGGGAATTACAGGAATACGGGCTCCGCCTAGCTACCTGATCCCATCATGA

B_rapa BnLRh1b (1) ----------------------------------------------------------------------------------------------------

B_juncea BnLRh1b (1) ----------------------------------------------------------------------------------------------------

B_napus BnLRh1b (1) ----------------------------------------------------------------------------------------------------

B_oleracea BnLRh1b (1) ----------------------------------------------------------------------------------------------------

1901 2000

Raphanus LR1-1 (1607) TGAACAACTACAGCTCGATAGAGACAACTCGGAAACTAGCACTGAAAAAGGGCATACTATCAATATGATCAATATGATATTACCTCGGTGTGCTAATCAA

Raphanus LR1-2 (1607) TGAACAACTACAGCTCGATAGAGACAACTCGGAAACTAGCACTGAAAAAGGGCATACTATCAATATGATCAATATGATATTACCTCGGTGTGCTAATCAA

Sinapis LR1-1 (1896) ATAGGAATTACCAGCGAACCAAGAGAGATAG-ATTCAACAGAGGAGAAGGGGTGGCGTGCTTTAGCGACACCTTCAAGACATCCAGGAGTGATCTAGACG

Sinapis LR1-2 (1896) ATAGGAATTACCAGCGAACCAAGAGAGATAG-ATTCAACAGAGGAGAAGGGGTGGCGTGCTTTAGCGACACCTTCAAGACATCCAGGAGTGATCTAGACG

B. nigra LR1-1 (762) ATAGGAATTACCAGCGAACCAAGAGAGATAG-ATTCAACAGAGGAGAAGGGGTGGCGTGCTTTAGCGACACCTTCAAGACATCCAGGAGTGATCTAGACG

B. nigra LR1-2 (765) ATAGGAATTACCAGCGAACCAAGAGAGATAG-ATTCAACAGAGGAGAAGGGGTGGCGTGCTTTAGCGACACCTTCAAGACATCCAGGAGTGATCTAGACG

B. carinata LR1-1 (761) ATAGGAATTACCAGCGAACCAAGAGAGATAG-ATTCAACAGAGGAGAAGGGGTGGCGTGCTTTAGCGACACCTTCAAGACATCCAGGAGTGATCTAGACG

B. carinata LR1-2 (761) ATAGGAATTACCAGCGAACCAAGAGAGATAG-ATTCAACAGAGGAGAAGGGGTGGCGTGCTTTAGCGACACCTTCAAGACATCCAGGAGTGATCTAGACG

B_rapa BnLRh1b (1) ----------------------------------------------------------------------------------------------------

B_juncea BnLRh1b (1) ----------------------------------------------------------------------------------------------------

B_napus BnLRh1b (1) ----------------------------------------------------------------------------------------------------

B_oleracea BnLRh1b (1) ----------------------------------------------------------------------------------------------------

2001 2100

Raphanus LR1-1 (1707) AGGTAAAGAACTGAATACCTAGATTTCTCTTATCCTTCCTTAGGTCCTCATGAATTAGAATAAAGTAAGGGAGCACACCGATCGAAACCTGTTTACTTTC

Raphanus LR1-2 (1707) AGGTAAAGAACTGAATACCTAGATTTCTCTTATCCTTCCTTAGGTCCTCATGAATTAGAATAAAGTAAGGGAGCACACCGATCGAAACCTGTTTACTTTC

Sinapis LR1-1 (1995) AGGTGGGACATGCCGGCTAGAGTACATGCTTCAACTGGAACATCGCTTCGCTACTCTTCCCTCCCTACCCCTACGGTCGTACACTCTGTTGATAGTTCGC

Sinapis LR1-2 (1995) AGGTGGGACATGCCGGCTAGAGTACATGCTTCAACTGGAACATCGCTTCGCTACTCTTCCCTCCCTACCCCTACGGTCGTACACTCTGTTGATAGTTCGC

B. nigra LR1-1 (861) AGGTGGGACATGCCGGCTAGAGTACATGCTTCAACTGGAACATCGCTTCGCTACTCTTCCCTCCCTACCCCTACGGTCGTACACTCTGTTGATAGTTCGC

B. nigra LR1-2 (864) AGGTGGGACATGCCGGCTAGAGTACATGCTTCAACTGGAACATCGCTTCGCTACTCTTCCCTCCCTACCCCTACGGTCGTACACTCTGTTGATAGTTCGC

B. carinata LR1-1 (860) AGGTGGGACATGCCGGCTAGAGTACATGCTTCAACTGGAACATCGCTTCGCTACTCTTCCCTCCCTACCCCTACGGTCGTACACTCTGTTGATAGTTCGC

B. carinata LR1-2 (860) AGGTGGGACATGCCGGCTAGAGTACATGCTTCAACTGGAACATCGCTTCGCTACTCTTCCCTCCCTACCCCTACGGTCGTACACTCTGTTGATAGTTCGC

B_rapa BnLRh1b (1) ----------------------------------------------------------------------------------------------------

B_juncea BnLRh1b (1) ----------------------------------------------------------------------------------------------------

B_napus BnLRh1b (1) ----------------------------------------------------------------------------------------------------

B_oleracea BnLRh1b (1) ----------------------------------------------------------------------------------------------------

2101 2200

Raphanus LR1-1 (1807) GAAAGTTGACCCGCCACCTACTACTTGTAGTCAACCAAAATTGCTTCGCTAGGAGTGTGCTATTAAAAGCTGTTGATCGGCCTATGGCACTTTACTAAAC

Raphanus LR1-2 (1807) GAAAGTTGACCCGCCACCTACTACTTGTAGTCAACCAAAATTGCTTCGCTAGGAGTGTGCTATTAAAAGCTGTTGATCGGCCTATGGCACTTTACTAAAC

Sinapis LR1-1 (2095) CAATGGCTCACAACCAGACAATCATAGTATGTTCGTTCGTTCACTTCGTTCTCTCTCTCCCCTTCTCCCGTTAGCTTGTTCCCCTCCTCCCTTCCCAACC

Sinapis LR1-2 (2095) CAATGGCTCACAACCAGACAATCATAGTATGTTCGTTCGTTCACTTCGTTCTCTCTCTCCCCTTCTCCCGTTAGCTTGTTCCCCTCCTCCCTTCCCAACC

B. nigra LR1-1 (961) CAATGGCTCACAACCAGACAATCATAGTATGTTCGTTCGTTCACTTCGTTCTCTCTCTCCCCTTCTCCCGTTAGCTTGTTCCCCTCCTCCCTTCCCAACC

B. nigra LR1-2 (964) CAATGGCTCACAACCAGACAATCATAGTATGTTCGTTCGTTCACTTCGTTCTCTCTCTCCCCTTCTCCCGTTAGCTTGTTCCCCTCCTCCCTTCCCAACC

B. carinata LR1-1 (960) CAATGGCTCACAACCAGACAATCATAGTATGTTCGTTCGTTCACTTCGTTCTCTCTCTCCCCTTCTCCCGTTAGCTTGTTCCCCTCCTCCCTTCCCAACC

B. carinata LR1-2 (960) CAATGGCTCACAACCAGACAATCATAGTATGTTCGTTCGTTCACTTCGTTCTCTCTCTCCCCTTCTCCCGTTAGCTTGTTCCCCTCCTCCCTTCCCAACC

B_rapa BnLRh1b (1) ----------------------------------------------------------------------------------------------------

B_juncea BnLRh1b (1) ----------------------------------------------------------------------------------------------------

B_napus BnLRh1b (1) ----------------------------------------------------------------------------------------------------

B_oleracea BnLRh1b (1) ----------------------------------------------------------------------------------------------------

2201 2300

Raphanus LR1-1 (1907) CTAGGAGAGGAGAACTGCTACTATCTATTGCATGGGTGCCTGCGTGTAAGAGGTGTAAGAGAAAGAAAGAAATTTCCGTCAACAGGATGAATCCCAGCGA

Raphanus LR1-2 (1907) CTAGGAGAGGAGAACTGCTACTATCTATTGCATGGGTGCCTGCGTGTAAGAGGTGTAAGAGAAAGAAAGAAATTTCCGTCAACAGGATGAATCCCAGCGA

Sinapis LR1-1 (2195) TTCCCAGCCCT--TCCTCCAAGAGTAGTTACGCCTTTTCCGTCAGTGGAGAGAGCGAGCAACGACCTGTGAGCGACCGTAGCTCCCTCTGCAAGTGGTAA

Sinapis LR1-2 (2195) TTCCCAGCCCT--TCCTCCAAGAGTAGTTACGCCTTTTCCGTCAGTGGAGAGAGCGAGCAACGACCTGTGAGCGACCGTAGCTCCCTCTGCAAGTGGTAA

B. nigra LR1-1 (1061) TTCCCAGCCCT--TCCTCCAAGAGTAGTTACGCCTTTTCCGTCAGTGGAGAGAGCGAGCAACGACCTGTGAGCGACCGTAGCTCCCTCTGCAAGTGGTAA

B. nigra LR1-2 (1064) TTCCCAGCCCT--TCCTCCAAGAGTAGTTACGCCTTTTCCGTCAGTGGAGAGAGCGAGCAACGACCTGTGAGCGACCGTAGCTCCCTCTGCAAGTGGTAA

B. carinata LR1-1 (1060) TTCCCAGCCCT--TCCTCCAAGAGTAGTTACGCCTTTTCCGTCAGTGGAGAGAGCGAGCAACGACCTGTGAGCGACCGTAGCTCCCTCTGCAAGTGGTAA

B. carinata LR1-2 (1060) TTCCCAGCCCT--TCCTCCAAGAGTAGTTACGCCTTTTCCGTCAGTGGAGAGAGCGAGCAACGACCTGTGAGCGACCGTAGCTCCCTCTGCAAGTGGTAA

B_rapa BnLRh1b (1) ----------------------------------------------------------------------------------------------------

B_juncea BnLRh1b (1) ----------------------------------------------------------------------------------------------------

B_napus BnLRh1b (1) ----------------------------------------------------------------------------------------------------

B_oleracea BnLRh1b (1) ----------------------------------------------------------------------------------------------------

2301 2400

Raphanus LR1-1 (2007) AAAGAAGGCGGAAAGCCTATGAAAGGTGGAAAGCCCTAGCGGAGCAATCTTAAAGATGGAAAGCTCTTAAAGGTGGAAAGCCAGCACAAGCACACTACTG

Raphanus LR1-2 (2007) AAAGAAGGCGGAAAGCCTATGAAAGGTGGAAAGCCCTAGCGGAGCAATCTTAAAGATGGAAAGCTCTTAAAGGTGGAAAGCCAGCACAAGCACACTACTG

Sinapis LR1-1 (2293) GGCGCAGTTCACCCCCTATCGAACGGAGGAAGATCGCTGTTGATGTCATGACTAACTTCTTGATTCTTTGATGAGAGAGGCGTGCGTGTGAAATGTCTGA

Sinapis LR1-2 (2293) GGCGCAGTTCACCCCCTATCGAACGGAGGAAGATCGCTGTTGATGTCATGACTAACTTCTTGATTCTTTGATGAGAGAGGCGTGCGTGTGAAATGTCTGA

B. nigra LR1-1 (1159) GGCGCAGTTCACCCCCTATCGAACGGAGGAAGATCGCTGTTGATGTCATGACTAACTTCTTGATTCTTTGATGAGAGAGGCGTGCGTGTGAAATGTCTGA

B. nigra LR1-2 (1162) GGCGCAGTTCACCCCCTATCGAACGGAGGAAGATCGCTGTTGATGTCATGACTAACTTCTTGATTCTTTGATGAGAGAGGCGTGCGTGTGAAATGTCTGA

B. carinata LR1-1 (1158) GGCGCAGTTCACCCCCTATCGAACGGAGGAAGATCGCTGTTGATGTCATGACTAACTTCTTGATTCTTTGATGAGAGAGGCGTGCGTGTGAAATGTCTGA

B. carinata LR1-2 (1158) GGCGCAGTTCACCCCCTATCGAACGGAGGAAGATCGCTGTTGATGTCATGACTAACTTCTTGATTCTTTGATGAGAGAGGCGTGCGTGTGAAATGTCTGA

B_rapa BnLRh1b (1) ----------------------------------------------------------------------------------------------------

B_juncea BnLRh1b (1) ----------------------------------------------------------------------------------------------------

B_napus BnLRh1b (1) ----------------------------------------------------------------------------------------------------

B_oleracea BnLRh1b (1) ----------------------------------------------------------------------------------------------------

2401 2500

Raphanus LR1-1 (2107) TGAAAGCTAAGAGTACTTCTATATTAGGAATTTTGCTAGTGGCGGATACGTACTATCTTCTTTATATTGACATTCTGCTACCCGGGAATCCAGTTCGTAA

Raphanus LR1-2 (2107) TGAAAGCTAAGAGTACTTCTATATTAGGAATTTTGCTAGTGGCGGATACGTACTATCTTCTTTATATTGACATTCTGCTACCCGGGAATCCAGTTCGTAA

Sinapis LR1-1 (2393) TTCATGGCTTGGTTAACGAGATGTCCCAACTGGTACTGGAGCACACCCGTCTGGTTCGTACCATCATTGGCTTGTTCAT--CCTTTACCTAAGCCTAATC

Sinapis LR1-2 (2393) TTCATGGCTTGGTTAACGAGATGTCCCAACTGGTACTGGAGCACACCCGTCTGGTTCGTACCATCATTGGCTTGTTCAT--CCTTTACCTAAGCCTAATC

B. nigra LR1-1 (1259) TTCATGGCTTGGTTAACGAGATGTCCCAACTGGTACTGGAGCACACCCGTCTGGTTCGTACCATCATTGGCTTGTTCAT--CCTTTACCTAAGCCTAATC

B. nigra LR1-2 (1262) TTCATGGCTTGGTTAACGAGATGTCCCAACTGGTACTGGAGCACACCCGTCTGGTTCGTACCATCATTGGCTTGTTCAT--CCTTTACCTAAGCCTAATC

B. carinata LR1-1 (1258) TTCATGGCTTGGTTAACGAGATGTCCCAACTGGTACTGGAGCACACCCGTCTGGTTCGTACCATCATTGGCTTGTTCAT--CCTTTACCTAAGCCTAATC

B. carinata LR1-2 (1258) TTCATGGCTTGGTTAACGAGATGTCCCAACTGGTACTGGAGCACACCCGTCTGGTTCGTACCATCATTGGCTTGTTCAT--CCTTTACCTAAGCCTAATC

B_rapa BnLRh1b (1) ----------------------------------------------------------------------------------------------------

B_juncea BnLRh1b (1) ----------------------------------------------------------------------------------------------------

B_napus BnLRh1b (1) ----------------------------------------------------------------------------------------------------

B_oleracea BnLRh1b (1) ----------------------------------------------------------------------------------------------------

2501 2600

Raphanus LR1-1 (2207) AACTCGGAGATATCAAACGGAAGTAAAAAAAAGCAGAGAAGGATTAAGACTAACCACTTTTTCGACATCCCTTCATGAAGCGCAGCAACATTTCGGAAGA

Raphanus LR1-2 (2207) AACTCGGAGATATCAAACGGAAGTAAAAAAAAGCAGAGAAGGATTAAGACTAACCACTTTTTCGACATCCCTTCATGAAGCGCAGCAACATTTCGGAAGA

Sinapis LR1-1 (2491) TTCTTCTTCATAGCACACGGAAGTAAAAAAAAGCAGAGAAGGATTAAGACTAACCACTTTTTCGACATCCCTTCATGAAGCGCAGCAACATTTCGGAAGA

Sinapis LR1-2 (2491) TTCTTCTTCATAGCACACGGAAGTAAAAAAAAGCAGAGAAGGATTAAGACTAACCACTTTTTCGACATCCCTTCATGAAGCGCAGCAACATTTCGGAAGA

B. nigra LR1-1 (1357) TTCTTCTTCATAGCACACGGAAGTAAAAAAAAGCAGAGAAGGATTAAGACTAACCACTTTTTCGACATCCCTTCATGAAGCGCAGCAACATTTCGGAAGA

B. nigra LR1-2 (1360) TTCTTCTTCATAGCACACGGAAGTAAAAAAAAGCAGAGAAGGATTAAGACTAACCACTTTTTCGACATCCCTTCATGAAGCGCAGCAACATTTCGGAAGA

B. carinata LR1-1 (1356) TTCTTCTTCATAGCACACGGAAGTAAAAAAAAGCAGAGAAGGATTAAGACTAACCACTTTTTCGACATCCCTTCATGAAGCGCAGCAACATTTCGGAAGA

B. carinata LR1-2 (1356) TTCTTCTTCATAGCACACGGAAGTAAAAAAAAGCAGAGAAGGATTAAGACTAACCACTTTTTCGACATCCCTTCATGAAGCGCAGCAACATTTCGGAAGA

B_rapa BnLRh1b (1) ----------------------------------------------------------------------------------------------------

B_juncea BnLRh1b (1) ----------------------------------------------------------------------------------------------------

B_napus BnLRh1b (1) ----------------------------------------------------------------------------------------------------

B_oleracea BnLRh1b (1) ----------------------------------------------------------------------------------------------------

2601 2700

Raphanus LR1-1 (2307) CTGCTAAAAGCGAGAAGTCCTGACCTTCGTTACTAGAGCACAGAAAAAGCAACAGTGTGCTGTACAGAGAACTTGCTTCGATAGGAAAAGAAAAGCTGTA

Raphanus LR1-2 (2307) CTGCTAAAAGCGAGAAGTCCTGACCTTCGTTACTAGAGCACAGAAAAAGCAACAGTGTGCTGTACAGAGAACTTGCTTCGATAGGAAAAGAAAAGCTGTA

Sinapis LR1-1 (2591) CTGCTAAAAGCGAGAAGTCCTGACCTTCGTTACTAGAGCACAGAAAAAGCAACAGTGTGCTGTACAGAGAACTTGCTTCGATAGGAAAAGAAAAGCTGTA

Sinapis LR1-2 (2591) CTGCTAAAAGCGAGAAGTCCTGACCTTCGTTACTAGAGCACAGAAAAAGCAACAGTGTGCTGTACAGAGAACTTGCTTCGATAGGAAAAGAAAAGCTGTA

B. nigra LR1-1 (1457) CTGCTAAAAGCGAGAAGTCCTGACCTTCGTTACTAGAGCACAGAAAAAGCAACAGTGTGCTGTACAGAGAACTTGCTTCGATAGGAAAAGAAAAGCTGTA

B. nigra LR1-2 (1460) CTGCTAAAAGCGAGAAGTCCTGACCTTCGTTACTAGAGCACAGAAAAAGCAACAGTGTGCTGTACAGAGAACTTGCTTCGATAGGAAAAGAAAAGCTGTA

B. carinata LR1-1 (1456) CTGCTAAAAGCGAGAAGTCCTGACCTTCGTTACTAGAGCACAGAAAAAGCAACAGTGTGCTGTACAGAGAACTTGCTTCGATAGGAAAAGAAAAGCTGTA

B. carinata LR1-2 (1456) CTGCTAAAAGCGAGAAGTCCTGACCTTCGTTACTAGAGCACAGAAAAAGCAACAGTGTGCTGTACAGAGAACTTGCTTCGATAGGAAAAGAAAAGCTGTA

B_rapa BnLRh1b (1) ----------------------------------------------------------------------------------------------------

B_juncea BnLRh1b (1) ----------------------------------------------------------------------------------------------------

B_napus BnLRh1b (1) ----------------------------------------------------------------------------------------------------

B_oleracea BnLRh1b (1) ----------------------------------------------------------------------------------------------------

2701 2800

Raphanus LR1-1 (2407) TTTCTAAGCTGGGAATGTTGGGTAAGAGTCCGCCTATTACCTCTAAAAAGTGGAGGAGGTGAGATCCCTGTTGGAGTCAACTTTTGAATTTACCGGCTTT

Raphanus LR1-2 (2407) TTTCTAAGCTGGGAATGTTGGGTAAGAGTCCGCCTATTACCTCTAAAAAGTGGAGGAGGTGAGATCCCTGTTGGAGTCAACTTTTGAATTTACCGGCTTT

Sinapis LR1-1 (2691) TTTCTAAGCTGGGAATGTTGGGTAAGAGTCCGCCTATTACCTCTAAAAAGTGGAGGAGGTGAGACCCCTGTTGGAGTCAACTTTTGAATTTACCGGCTTT

Sinapis LR1-2 (2691) TTTCTAAGCTGGGAATGTTGGGTAAGAGTCCGCCTATTACCTCTAAAAAGTGGAGGAGGTGAGACCCCTGTTGGAGTCAACTTTTGAATTTACCGGCTTT

B. nigra LR1-1 (1557) TTTCTAAGCTGGGAATGTTGGGTAAGAGTCCGCCTATTACCTCTAAAAAGTGGAGGAGGTGAGACCCCTGTTGGAGTCAACTTTTGAATTTACCGGCTTT

B. nigra LR1-2 (1560) TTTCTAAGCTGGGAATGTTGGGTAAGAGTCCGCCTATTACCTCTAAAAAGTGGAGGAGGTGAGACCCCTGTTGGAGTCAACTTTTGAATTTACCGGCTTT

B. carinata LR1-1 (1556) TTTCTAAGCTGGGAATGTTGGGTAAGAGTCCGCCTATTACCTCTAAAAAGTGGAGGAGGTGAGACCCCTGTTGGAGTCAACTTTTGAATTTACCGGCTTT

B. carinata LR1-2 (1556) TTTCTAAGCTGGGAATGTTGGGTAAGAGTCCGCCTATTACCTCTAAAAAGTGGAGGAGGTGAGACCCCTGTTGGAGTCAACTTTTGAATTTACCGGCTTT

B_rapa BnLRh1b (1) ----------------------------------------------------------------------------------------------------

B_juncea BnLRh1b (1) ----------------------------------------------------------------------------------------------------

B_napus BnLRh1b (1) ----------------------------------------------------------------------------------------------------

B_oleracea BnLRh1b (1) ----------------------------------------------------------------------------------------------------

2801 2900

Raphanus LR1-1 (2507) GGAGAAACCTTTTCAGTTGCTTAGTGCGAATCCCACGTTTCGAGGGTGGGTAAGGTCTCAGTACCTCGGATATAGCACAGAAAGGCCTATAGCATCCAAT

Raphanus LR1-2 (2507) GGAGAAACCTTTTCAGTTGCTTAGTGCGAATCCCACGTTTCGAGGGTGGGTAAGGTCTCAGTACCTCGGATATAGCACAGAAAGGCCTATAGCATCCAAT

Sinapis LR1-1 (2791) GGAGAAACCTTTTCAGTTGCTTAGTGCGAATCCCACGTTTCGAGGGTGGGTAAGGTCTCAGTACCTCGGATATAGCACAGAAAGGCCTATAGCATCCAAT

Sinapis LR1-2 (2791) GGAGAAACCTTTTCAGTTGCTTAGTGCGAATCCCACGTTTCGAGGGTGGGTAAGGTCTCAGTACCTCGGATATAGCACAGAAAGGCCTATAGCATCCAAT

B. nigra LR1-1 (1657) GGAGAAACCTTTTCAGTTGCTTAGTGCGAATCCCACGTTTCGAGGGTGGGTAAGGTCTCAGTACCTCGGATATAGCACAGAAAGGCCTATAGCATCCAAT

B. nigra LR1-2 (1660) GGAGAAACCTTTTCAGTTGCTTAGTGCGAATCCCACGTTTCGAGGGTGGGTAAGGTCTCAGTACCTCGGATATAGCACAGAAAGGCCTATAGCATCCAAT

B. carinata LR1-1 (1656) GGAGAAACCTTTTCAGTTGCTTAGTGCGAATCCCACGTTTCGAGGGTGGGTAAGGTCTCAGTACCTCGGATATAGCACAGAAAGGCCTATAGCATCCAAT

B. carinata LR1-2 (1656) GGAGAAACCTTTTCAGTTGCTTAGTGCGAATCCCACGTTTCGAGGGTGGGTAAGGTCTCAGTACCTCGGATATAGCACAGAAAGGCCTATAGCATCCAAT

B_rapa BnLRh1b (1) ----------------------------------------------------------------------------------------------------

B_juncea BnLRh1b (1) ----------------------------------------------------------------------------------------------------

B_napus BnLRh1b (1) ----------------------------------------------------------------------------------------------------

B_oleracea BnLRh1b (1) ----------------------------------------------------------------------------------------------------

2901 3000

Raphanus LR1-1 (2607) ACCACTTTTCAGGTTACTTCCTTGTGAGCTTGTCAGACAAAGTAGGCGACGGTGTGCTGCACTACATCTCCTCAGCAGTTGATCGGTCAGGTTCCTTGCC

Raphanus LR1-2 (2607) ACCACTTTTCAGGTTACTTCCTTGTGAGCTTGTCAGACAAAGTAGGCGACGGTGTGCTGCACTACATCTCCTCAGCAGTTGATCGGTCAGGTTCCTTGCC

Sinapis LR1-1 (2891) ACCACTTTTCAGGTTACTTCCTTGTGAGCTTGTCAGACAAAGTAGGCGACGGTGTGCTGCACTACATCTCCTCAGCAGTTGATCGGTCAGGTTCCTTGCC

Sinapis LR1-2 (2891) ACCACTTTTCAGGTTACTTCCTTGTGAGCTTGTCAGACAAAGTAGGCGACGGTGTGCTGCACTACATCTCCTCAGCAGTTGATCGGTCAGGTTCCTTGCC

B. nigra LR1-1 (1757) ACCACTTTTCAGGTTACTTCCTTGTGAGCTTGTCAGACAAAGTAGGCGACGGTGTGCTGCACTACATCTCCTCAGCAGTTGATCGGTCAGGTTCCTTGCC

B. nigra LR1-2 (1760) ACCACTTTTCAGGTTACTTCCTTGTGAGCTTGTCAGACAAAGTAGGCGACGGTGTGCTGCACTACATCTCCTCAGCAGTTGATCGGTCAGGTTCCTTGCC

B. carinata LR1-1 (1756) ACCACTTTTCAGGTTACTTCCTTGTGAGCTTGTCAGACAAAGTAGGCGACGGTGTGCTGCACTACATCTCCTCAGCAGTTGATCGGTCAGGTTCCTTGCC

B. carinata LR1-2 (1756) ACCACTTTTCAGGTTACTTCCTTGTGAGCTTGTCAGACAAAGTAGGCGACGGTGTGCTGCACTACATCTCCTCAGCAGTTGATCGGTCAGGTTCCTTGCC

B_rapa BnLRh1b (1) ----------------------------------------------------------------------------------------------------

B_juncea BnLRh1b (1) ----------------------------------------------------------------------------------------------------

B_napus BnLRh1b (1) ----------------------------------------------------------------------------------------------------

B_oleracea BnLRh1b (1) ----------------------------------------------------------------------------------------------------

3001 3100

Raphanus LR1-1 (2707) TTGCTTAACCCAGCTCGAGTATTATTCGAAACGAGGAATATCCTTACTCTAGAAGCTCAGAGTTAAGAGTTAAGGGAAGGTGTTAGCTAAGGAATTAGGT

Raphanus LR1-2 (2707) TTGCTTAACCCAGCTCGAGTATTATTCGAAACGAGGAATATCCTTACTCTAGAAGCTCAGAGTTAAGAGTTAAGGGAAGGTGTTAGCTAAGGAATTAGGT

Sinapis LR1-1 (2991) TTGCTTAACCCAGCTCGAGTATTATTCGAAACGAGGAATATCCTTACTCTAGAAGCTCAGAGTTAAGAGTTAAGGGAAGGTGTTAGCTAAGGAATTAGGT

Sinapis LR1-2 (2991) TTGCTTAACCCAGCTCGAGTATTATTCGAAACGAGGAATATCCTTACTCTAGAAGCTCAGAGTTAAGAGTTAAGGGAAGGTGTTAGCTAAGGAATTAGGT

B. nigra LR1-1 (1857) TTGCTTAACCCAGCTCGAGTATTATTCGAAACGAGGAATATCCTTACTCTAGAAGCTCAGAGTTAAGAGTTAAGGGAAGGTGTTAGCTAAGGAATTAGGT

B. nigra LR1-2 (1860) TTGCTTAACCCAGCTCGAGTATTATTCGAAACGAGGAATATCCTTACTCTAGAAGCTCAGAGTTAAGAGTTAAGGGAAGGTGTTAGCTAAGGAATTAGGT

B. carinata LR1-1 (1856) TTGCTTAACCCAGCTCGAGTATTATTCGAAACGAGGAATATCCTTACTCTAGAAGCTCAGAGTTAAGAGTTAAGGGAAGGTGTTAGCTAAGGAATTAGGT

B. carinata LR1-2 (1856) TTGCTTAACCCAGCTCGAGTATTATTCGAAACGAGGAATATCCTTACTCTAGAAGCTCAGAGTTAAGAGTTAAGGGAAGGTGTTAGCTAAGGAATTAGGT

B_rapa BnLRh1b (1) ----------------------------------------------------------------------------------------------------

B_juncea BnLRh1b (1) ----------------------------------------------------------------------------------------------------

B_napus BnLRh1b (1) ----------------------------------------------------------------------------------------------------

B_oleracea BnLRh1b (1) ----------------------------------------------------------------------------------------------------

3101 3200

Raphanus LR1-1 (2807) CTTCCTCTTCGAAAGGAGAACTCTAGTCTACCGTGGTGGGTAGTAGCTACTCCCAGTACATCTATCATCCGTGACATCCATGGCAACTACTACTTTTCAT

Raphanus LR1-2 (2807) CTTCCTCTTCGAAAGGAGAACTCTAGTCTACCGTGGTGGGTAGTAGCTACTCCCAGTACATCTATCATCCGTGACATCCATGGCAACTACTACTTTTCAT

Sinapis LR1-1 (3091) CTTCCTCTTCGAAAGGAGAACTCTAGTCTACCGTGGTGGGTAGTAGCTACTCCCAGTACATCTATCATCCGTGACATCCATGGCAACTACTACTTTTCAT

Sinapis LR1-2 (3091) CTTCCTCTTCGAAAGGAGAACTCTAGTCTACCGTGGTGGGTAGTAGCTACTCCCAGTACATCTATCATCCGTGACATCCATGGCAACTACTACTTTTCAT

B. nigra LR1-1 (1957) CTTCCTCTTCGAAAGGAGAACTCTAGTCTACCGTGGTGGGTAGTAGCTACTCCCAGTACATCTATCATCCGTGACATCCATGGCAACTACTACTTTTCAT

B. nigra LR1-2 (1960) CTTCCTCTTCGAAAGGAGAACTCTAGTCTACCGTGGTGGGTAGTAGCTACTCCCAGTACATCTATCATCCGTGACATCCATGGCAACTACTACTTTTCAT

B. carinata LR1-1 (1956) CTTCCTCTTCGAAAGGAGAACTCTAGTCTACCGTGGTGGGTAGTAGCTACTCCCAGTACATCTATCATCCGTGACATCCATGGCAACTACTACTTTTCAT

B. carinata LR1-2 (1956) CTTCCTCTTCGAAAGGAGAACTCTAGTCTACCGTGGTGGGTAGTAGCTACTCCCAGTACATCTATCATCCGTGACATCCATGGCAACTACTACTTTTCAT

B_rapa BnLRh1b (1) ----------------------------------------------------------------------------------------------------

B_juncea BnLRh1b (1) ----------------------------------------------------------------------------------------------------

B_napus BnLRh1b (1) ----------------------------------------------------------------------------------------------------

B_oleracea BnLRh1b (1) ----------------------------------------------------------------------------------------------------

3201 3300

Raphanus LR1-1 (2907) TGCTGTGCTGTTTAATCGATCGAACAAAACTCCTAAGGTAGAGATCTTAAGAAGAGGACGAGCTCAACTCCCGATTGTTCAAGCTTAGATACCTCTTTGA

Raphanus LR1-2 (2907) TGCTGTGCTGTTTAATCGATCGAACAAAACTCCTAAGGTAGAGATCTTAAGAAGAGGACGAGCTCAACTCCCGATTGTTCAAGCTTAGATACCTCTTTGA

Sinapis LR1-1 (3191) TGCTGTGCTGTTTAATCGATCGAACAAAACTCCTAAGGTAGAGATCTTAAGAAGAGGACGAGCTCAACTCCCGATTGTTCAAGCTTAGATACCTCTTTGA

Sinapis LR1-2 (3191) TGCTGTGCTGTTTAATCGATCGAACAAAACTCCTAAGGTAGAGATCTTAAGAAGAGGACGAGCTCAACTCCCGATTGTTCAAGCTTAGATACCTCTTTGA

B. nigra LR1-1 (2057) TGCTGTGCTGTTTAATCGATCGAACAAAACTCCTAAGGTAGAGATCTTAAGAAGAGGACGAGCTCAACTCCCGATTGTTCAAGCTTAGATACCTCTTTGA

B. nigra LR1-2 (2060) TGCTGTGCTGTTTAATCGATCGAACAAAACTCCTAAGGTAGAGATCTTAAGAAGAGGACGAGCTCAACTCCCGATTGTTCAAGCTTAGATACCTCTTTGA

B. carinata LR1-1 (2056) TGCTGTGCTGTTTAATCGATCGAACAAAACTCCTAAGGTAGAGATCTTAAGAAGAGGACGAGCTCAACTCCCGATTGTTCAAGCTTAGATACCTCTTTGA

B. carinata LR1-2 (2056) TGCTGTGCTGTTTAATCGATCGAACAAAACTCCTAAGGTAGAGATCTTAAGAAGAGGACGAGCTCAACTCCCGATTGTTCAAGCTTAGATACCTCTTTGA

B_rapa BnLRh1b (1) ----------------------------------------------------------------------------------------------------

B_juncea BnLRh1b (1) ----------------------------------------------------------------------------------------------------

B_napus BnLRh1b (1) ----------------------------------------------------------------------------------------------------

B_oleracea BnLRh1b (1) ----------------------------------------------------------------------------------------------------

3301 3400

Raphanus LR1-1 (3007) TTTGGGATTGACGAAACAGTATAAACCTTTCTAATAGGCCTATTTTGTGCGTTTAATCACCTTTCTTTCATCTCTGAGCCAGCTATCCTTTCAGAATAGG

Raphanus LR1-2 (3007) TTTGGGATTGACGAAACAGTATAAACCTTTCTAATAGGCCTATTTTGTGCGTTTAATCACCTTTCTTTCATCTCTGAGCCAGCTATCCTTTCAGAATAGG

Sinapis LR1-1 (3291) TTTGGGATTGACGAAACAGTATAAACCTTTATAATAGGCCTATTTTGTGCGTTTAATCACCTTTCTTTCATCTCTGAGCCAGCTATCCTTTCAGAATAGG

Sinapis LR1-2 (3291) TTTGGGATTGACGAAACAGTATAAACCTTTATAATAGGCCTATTTTGTGCGTTTAATCACCTTTCTTTCATCTCTGAGCCAGCTATCCTTTCAGAATAGG

B. nigra LR1-1 (2157) TTTGGGATTGACGAAACAGTATAAACCTTTATAATAGGCCTATTTTGTGCGTTTAATCACCTTTCTTTCATCTCTGAGCCAGCTATCCTTTCAGAATAGG

B. nigra LR1-2 (2160) TTTGGGATTGACGAAACAGTATAAACCTTTATAATAGGCCTATTTTGTGCGTTTAATCACCTTTCTTTCATCTCTGAGCCAGCTATCCTTTCAGAATAGG

B. carinata LR1-1 (2156) TTTGGGATTGACGAAACAGTATAAACCTTTATAATAGGCCTATTTTGTGCGTTTAATCACCTTTCTTTCATCTCTGAGCCAGCTATCCTTTCAGAATAGG

B. carinata LR1-2 (2156) TTTGGGATTGACGAAACAGTATAAACCTTTATAATAGGCCTATTTTGTGCGTTTAATCACCTTTCTTTCATCTCTGAGCCAGCTATCCTTTCAGAATAGG

B_rapa BnLRh1b (1) ----------------------------------------------------------------------------------------------------

B_juncea BnLRh1b (1) ----------------------------------------------------------------------------------------------------

B_napus BnLRh1b (1) ----------------------------------------------------------------------------------------------------

B_oleracea BnLRh1b (1) ----------------------------------------------------------------------------------------------------

3401 3500

Raphanus LR1-1 (3107) GCTTTCCGCTTTCTTTTAAGGTGAGGAATCTTAGGAGTTCAGCTTTTTCGATTAAACGAAGAATTCTGTCATTTCAGATGGGATTCCAAAGCAAGGCTAG

Raphanus LR1-2 (3107) GCTTTCCGCTTTCTTTTAAGGTGAGGAATCTTAGGAGTTCAGCTTTTTCGATTAAACGAAGAATTCTGTCATTTCAGATGGGATTCCAAAGCAAGGCTAG

Sinapis LR1-1 (3391) GCTTTCCGCTTTCTTTTAAGGTGAGGAATCTTAGGAGTTCAGCTTTTTCGATTAAACGAAGAATTCTGTCATTTCAGATGGGATTCCAAAGCAAGGCTAG

Sinapis LR1-2 (3391) GCTTTCCGCTTTCTTTTAAGGTGAGGAATCTTAGGAGTTCAGCTTTTTCGATTAAACGAAGAATTCTGTCATTTCAGATGGGATTCCAAAGCAAGGCTAG

B. nigra LR1-1 (2257) GCTTTCCGCTTTCTTTTAAGGTGAGGAATCTTAGGAGTTCAGCTTTTTCGATTAAACGAAGAATTCTGTCATTTCAGATGGGATTCCAAAGCAAGGCTAG

B. nigra LR1-2 (2260) GCTTTCCGCTTTCTTTTAAGGTGAGGAATCTTAGGAGTTCAGCTTTTTCGATTAAACGAAGAATTCTGTCATTTCAGATGGGATTCCAAAGCAAGGCTAG

B. carinata LR1-1 (2256) GCTTTCCGCTTTCTTTTAAGGTGAGGAATCTTAGGAGTTCAGCTTTTTCGATTAAACGAAGAATTCTGTCATTTCAGATGGGATTCCAAAGCAAGGCTAG

B. carinata LR1-2 (2256) GCTTTCCGCTTTCTTTTAAGGTGAGGAATCTTAGGAGTTCAGCTTTTTCGATTAAACGAAGAATTCTGTCATTTCAGATGGGATTCCAAAGCAAGGCTAG

B_rapa BnLRh1b (1) ----------------------------------------------------------------------------------------------------

B_juncea BnLRh1b (1) ----------------------------------------------------------------------------------------------------

B_napus BnLRh1b (1) ----------------------------------------------------------------------------------------------------

B_oleracea BnLRh1b (1) ----------------------------------------------------------------------------------------------------

3501 3600

Raphanus LR1-1 (3207) TTATCTATGTTAGCTTCATTCCTGTGAAGTTGGTTTCTAGTTTTGATCTTTGAGTTGGCAGTAACATGACTAGCAGCATAGTACGCACACACGAAAGTCA

Raphanus LR1-2 (3207) TTATCTATGTTAGCTTCATTCCTGTGAAGTTGGTTTCTAGTTTTGATCTTTGAGTTGGCAGTAACATGACTAGCAGCATAGTACGCACACACGAAAGTCA

Sinapis LR1-1 (3491) TTATCTATGTTAGCTTCATTCCTGTGAAGTTGGTTTCTAGTTTTTATCTTTGAGTTGGCAGTAACATGACTAGCAGCATAGTACGCACACACGAAAGTCA

Sinapis LR1-2 (3491) TTATCTATGTTAGCTTCATTCCTGTGAAGTTGGTTTCTAGTTTTTATCTTTGAGTTGGCAGTAACATGACTAGCAGCATAGTACGCACACACGAAAGTCA

B. nigra LR1-1 (2357) TTATCTATGTTAGCTTCATTCCTGTGAAGTTGGTTTCTAGTTTTTATCTTTGAGTTGGCAGTAACATGACTAGCAGCATAGTACGCACACACGAAAGTCA

B. nigra LR1-2 (2360) TTATCTATGTTAGCTTCATTCCTGTGAAGTTGGTTTCTAGTTTTTATCTTTGAGTTGGCAGTAACATGACTAGCAGCATAGTACGCACACACGAAAGTCA

B. carinata LR1-1 (2356) TTATCTATGTTAGCTTCATTCCTGTGAAGTTGGTTTCTAGTTTTTATCTTTGAGTTGGCAGTAACATGACTAGCAGCATAGTACGCACACACGAAAGTCA

B. carinata LR1-2 (2356) TTATCTATGTTAGCTTCATTCCTGTGAAGTTGGTTTCTAGTTTTTATCTTTGAGTTGGCAGTAACATGACTAGCAGCATAGTACGCACACACGAAAGTCA

B_rapa BnLRh1b (1) ----------------------------------------------------------------------------------------------------

B_juncea BnLRh1b (1) ----------------------------------------------------------------------------------------------------

B_napus BnLRh1b (1) ----------------------------------------------------------------------------------------------------

B_oleracea BnLRh1b (1) ----------------------------------------------------------------------------------------------------

3601 3700

Raphanus LR1-1 (3307) AGGGATTGTCTGGCCCTGCTACCTACCCAACATGAGCACACTCCGAAATTAGAGTAGCTATCTATTTCATAAGAGACCTCTTGCAGATTGAAGCATGATT

Raphanus LR1-2 (3307) AGGGATTGTCTGGCCCTGCTACCTACCCAACATGAGCACACTCCGAAATTAGAGTAGCTATCTATTTCATAAGAGACCTCTTGCAGATTGAAGCATGATT

Sinapis LR1-1 (3591) AGGGATTGTCTGGCCCTGCTACCTACCCAACATGAGCACACTCCGAAATTAGAGTAGCTATCTATTTCATAAGAGACCTCTTGCAGATTGAAGCATGATT

Sinapis LR1-2 (3591) AGGGATTGTCTGGCCCTGCTACCTACCCAACATGAGCACACTCCGAAATTAGAGTAGCTATCTATTTCATAAGAGACCTCTTGCAGATTGAAGCATGATT

B. nigra LR1-1 (2457) AGGGATTGTCTGGCCCTGCTACCTACCCAACATGAGCACACTCCGAAATTAGAGTAGCTATCTATTTCATAAGAGACCTCTTGCAGATTGAAGCATGATT

B. nigra LR1-2 (2460) AGGGATTGTCTGGCCCTGCTACCTACCCAACATGAGCACACTCCGAAATTAGAGTAGCTATCTATTTCATAAGAGACCTCTTGCAGATTGAAGCATGATT

B. carinata LR1-1 (2456) AGGGATTGTCTGGCCCTGCTACCTACCCAACATGAGCACACTCCGAAATTAGAGTAGCTATCTATTTCATAAGAGACCTCTTGCAGATTGAAGCATGATT

B. carinata LR1-2 (2456) AGGGATTGTCTGGCCCTGCTACCTACCCAACATGAGCACACTCCGAAATTAGAGTAGCTATCTATTTCATAAGAGACCTCTTGCAGATTGAAGCATGATT

B_rapa BnLRh1b (1) ----------------------------------------------------------------------------------------------------

B_juncea BnLRh1b (1) ----------------------------------------------------------------------------------------------------

B_napus BnLRh1b (1) ----------------------------------------------------------------------------------------------------

B_oleracea BnLRh1b (1) ----------------------------------------------------------------------------------------------------

3701 3800

Raphanus LR1-1 (3407) GGGCTCTCCGCTTCTCTTCAGATGGAACTTCGCCATGTCCATGTCCCTCGAGTACTGTTCCTAGAGTATAGTAGAGTACGGATCGATTGAACTGGTTTCT

Raphanus LR1-2 (3407) GGGCTCTCCGCTTCTCTTCAGATGGAACTTCGCCATGTCCATGTCCCTCGAGTACTGTTCCTAGAGTATAGTAGAGTACGGATCGATTGAACTGGTTTCT

Sinapis LR1-1 (3691) GGGCTCTCCGCTTCTCTTCAGATGGAACTTCGCCATGTCC------CTCGAGTACTGTTCCTAGAGTATAGTAGAGTACGGATCGATTGAACTGGTTTTT

Sinapis LR1-2 (3691) GGGCTCTCCGCTTCTCTTCAGATGGAACTTCGCCATGTCC------CTCGAGTACTGTTCCTAGAGTATAGTAGAGTACGGATCGATTGAACTGGTTTTT

B. nigra LR1-1 (2557) GGGCTCTCCGCTTCTCTTCAGATGGAACTTCGCCATGTCCATGTCCCTCGAGTACTGTTCCTAGAGTATAGTAGAGTACGGATCGATTGAACTGGTTTCT

B. nigra LR1-2 (2560) GGGCTCTCCGCTTCTCTTCAGATGGAACTTCGCCATGTCCATGTCCCTCGAGTACTGTTCCTAGAGTATAGTAGAGTACGGATCGATTGAACTGGTTTCT

B. carinata LR1-1 (2556) GGGCTCTCCGCTTCTCTTCAGATGGAACTTCGCCATGTCCATGTCCCTCGAGTACTGTTCCTAGAGTATAGTAGAGTACGGATCGATTGAACTGGTTTCT

B. carinata LR1-2 (2556) GGGCTCTCCGCTTCTCTTCAGATGGAACTTCGCCATGTCCATGTCCCTCGAGTACTGTTCCTAGAGTATAGTAGAGTACGGATCGATTGAACTGGTTTCT

B_rapa BnLRh1b (1) ----------------------------------------------------------------------------------------------------

B_juncea BnLRh1b (1) ----------------------------------------------------------------------------------------------------

B_napus BnLRh1b (1) ----------------------------------------------------------------------------------------------------

B_oleracea BnLRh1b (1) ----------------------------------------------------------------------------------------------------

3801 3900

Raphanus LR1-1 (3507) GTCGTACCCCTAACGGTACAGTTATGACCTAATGCGGGGTCTCTCTCAGGCAGAAGATCAACCGATGTACGATGTTGGACCTAATGAGAGGTCCTTCTCT

Raphanus LR1-2 (3507) GTCGTACCCCTAACGGTACAGTTATGACCTAATGCGGGGTCTCTCTCAGGCAGAAGATCAACCGATGTACGATGTTGGACCTAATGAGAGGTCCTTCTCT

Sinapis LR1-1 (3785) GTCGTACCCCTAACGGTACAGTTATGACCTAATGCGGGGTCTCTCTCAGGCAGAAGATCAACCGATGTACGATGTTGGACCTAATGAGAGGTCCTTCTCT

Sinapis LR1-2 (3785) GTCGTACCCCTAACGGTACAGTTATGACCTAATGCGGGGTCTCTCTCAGGCAGAAGATCAACCGATGTACGATGTTGGACCTAATGAGAGGTCCTTCTCT

B. nigra LR1-1 (2657) GTCGTACCCCTAACGGTACAGTTATGACCTAATGCGGGGTCTCTCTCAGGCAGAAGATCAACCGATGTACGATGTTGGACCTAATGAGAGGTCCTTCTCT

B. nigra LR1-2 (2660) GTCGTACCCCTAACGGTACAGTTATGACCTAATGCGGGGTCTCTCTCAGGCAGAAGATCAACCGATGTACGATGTTGGACCTAATGAGAGGTCCTTCTCT

B. carinata LR1-1 (2656) GTCGTACCCCTAACGGTACAGTTATGACCTAATGCGGGGTCTCTCTCAGGCAGAAGATCAACCGATGTACGATGTTGGACCTAATGAGAGGTCCTTCTCT

B. carinata LR1-2 (2656) GTCGTACCCCTAACGGTACAGTTATGACCTAATGCGGGGTCTCTCTCAGGCAGAAGATCAACCGATGTACGATGTTGGACCTAATGAGAGGTCCTTCTCT

B_rapa BnLRh1b (1) ----------------------------------------------------------------------------------------------------

B_juncea BnLRh1b (1) ----------------------------------------------------------------------------------------------------

B_napus BnLRh1b (1) ----------------------------------------------------------------------------------------------------

B_oleracea BnLRh1b (1) ----------------------------------------------------------------------------------------------------

3901 4000

Raphanus LR1-1 (3607) GTCAGGGTTTATAGGTCAACTGGTTGCTTCGCTAGAGTAGGACCTAACCCATGTACTGTGAGTGTTGATTAGTCACCCTGATATCGAGTGAGCATTCGGG

Raphanus LR1-2 (3607) GTCAGGGTTTATAGGTCAACTGGTTGCTTCGCTAGAGTAGGACCTAACCCATGTACTGTGAGTGTTGATTAGTCACCCTGATATCGAGTGAGCATTCGGG

Sinapis LR1-1 (3885) GTCAGGGTTTATAGGTCAACTGGTTGCTTCGCTAGAGTAGGACCTAACCCATGTACTGTGAGTGTTGATTAGTCACCCTGATATCGAGTGAGCATTCGGG

Sinapis LR1-2 (3885) GTCAGGGTTTATAGGTCAACTGGTTGCTTCGCTAGAGTAGGACCTAACCCATGTACTGTGAGTGTTGATTAGTCACCCTGATATCGAGTGAGCATTCGGG

B. nigra LR1-1 (2757) GTCAGGGTTTATAGGTCAACTGGTTGCTTCGCTAGAGTAGGACCTAACCCATGTACTGTGAGTGTTGATTAGTCACCCTGATATCGAGTGAGCATTCGGG

B. nigra LR1-2 (2760) GTCAGGGTTTATAGGTCAACTGGTTGCTTCGCTAGAGTAGGACCTAACCCATGTACTGTGAGTGTTGATTAGTCACCCTGATATCGAGTGAGCATTCGGG

B. carinata LR1-1 (2756) GTCAGGGTTTATAGGTCAACTGGTTGCTTCGCTAGAGTAGGACCTAACCCATGTACTGTGAGTGTTGATTAGTCACCCTGATATCGAGTGAGCATTCGGG

B. carinata LR1-2 (2756) GTCAGGGTTTATAGGTCAACTGGTTGCTTCGCTAGAGTAGGACCTAACCCATGTACTGTGAGTGTTGATTAGTCACCCTGATATCGAGTGAGCATTCGGG

B_rapa BnLRh1b (1) ----------------------------------------------------------------------------------------------------

B_juncea BnLRh1b (1) ----------------------------------------------------------------------------------------------------

B_napus BnLRh1b (1) ----------------------------------------------------------------------------------------------------

B_oleracea BnLRh1b (1) ----------------------------------------------------------------------------------------------------

4001 4100

Raphanus LR1-1 (3707) GGTGTAGACTTCACACTTTAACAGGTCATCTGTCTTTCGAAGTTTTCTGTAACACAGAGATGTAGTTGCAAGGCAAAGGTCAACTAGCTTGCTTCGCTAG

Raphanus LR1-2 (3707) GGTGTAGACTTCACACTTTAACAGGTCATCTGTCTTTCGAAGTTTTCTGTAACACAGAGATGTAGTTGCAAGGCAAAGGTCAACTAGCTTGCTTCGCTAG

Sinapis LR1-1 (3985) GGTGTAGACTTCACACTTTAACAGGTCATCTGTCTTTCGAAGTTTTCTGTAACACAGAGATGTAGTTGCAAGGCAAAGGTCAACTAGCTTGCTTCGCTAG

Sinapis LR1-2 (3985) GGTGTAGACTTCACACTTTAACAGGTCATCTGTCTTTCGAAGTTTTCTGTAACACAGAGATGTAGTTGCAAGGCAAAGGTCAACTAGCTTGCTTCGCTAG

B. nigra LR1-1 (2857) GGTGTAGACTTCACACTTTAACAGGTCATCTGTCTTTCGAAGTTTTCTGTAACACAGAGATGTAGTTGCAAGGCAAAGGTCAACTAGCTTGCTTCGCTAG

B. nigra LR1-2 (2860) GGTGTAGACTTCACACTTTAACAGGTCATCTGTCTTTCGAAGTTTTCTGTAACACAGAGATGTAGTTGCAAGGCAAAGGTCAACTAGCTTGCTTCGCTAG

B. carinata LR1-1 (2856) GGTGTAGACTTCACACTTTAACAGGTCATCTGTCTTTCGAAGTTTTCTGTAACACAGAGATGTAGTTGCAAGGCAAAGGTCAACTAGCTTGCTTCGCTAG

B. carinata LR1-2 (2856) GGTGTAGACTTCACACTTTAACAGGTCATCTGTCTTTCGAAGTTTTCTGTAACACAGAGATGTAGTTGCAAGGCAAAGGTCAACTAGCTTGCTTCGCTAG

B_rapa BnLRh1b (1) ----------------------------------------------------------------------------------------------------

B_juncea BnLRh1b (1) ----------------------------------------------------------------------------------------------------

B_napus BnLRh1b (1) ----------------------------------------------------------------------------------------------------

B_oleracea BnLRh1b (1) ----------------------------------------------------------------------------------------------------

4101 4200

Raphanus LR1-1 (3807) GTTGCTTCGCTAGGGACTTAAGGAGAAGTGATTTTCTGTAGCACAGAGATGACTTTAGTAAGTTGCAAGGCGAAGGCCTCAACGATTGTGGTTAATCTAT

Raphanus LR1-2 (3807) GTTGCTTCGCTAGGGACTTAAGGAGAAGTGATTTTCTGTAGCACAGAGATGACTTTAGTAAGTTGCAAGGCGAAGGCCTCAACGATTGTGGTTAATCTAT

Sinapis LR1-1 (4085) GTTGCTTCGCTAGGGACTTAAGGAGAAGTTATTTTCTGTAGCACAGAGATGACTTTAGTAAGTTGCAAGGCGAAGGCCTCAACGATTGTGGTTAATCTAT

Sinapis LR1-2 (4085) GTTGCTTCGCTAGGGACTTAAGGAGAAGTTATTTTCTGTAGCACAGAGATGACTTTAGTAAGTTGCAAGGCGAAGGCCTCAACGATTGTGGTTAATCTAT

B. nigra LR1-1 (2957) GTTGCTTCGCTAGGGACTTAAGGAGAAGTTATTTTCTGTAGCACAGAGATGACTTTAGTAAGTTGCAAGGCGAAGGCCTCAACGATTGTGGTTAATCTAT

B. nigra LR1-2 (2960) GTTGCTTCGCTAGGGACTTAAGGAGAAGTTATTTTCTGTAGCACAGAGATGACTTTAGTAAGTTGCAAGGCGAAGGCCTCAACGATTGTGGTTAATCTAT

B. carinata LR1-1 (2956) GTTGCTTCGCTAGGGACTTAAGGAGAAGTTATTTTCTGTAGCACAGAGATGACTTTAGTAAGTTGCAAGGCGAAGGCCTCAACGATTGTGGTTAATCTAT

B. carinata LR1-2 (2956) GTTGCTTCGCTAGGGACTTAAGGAGAAGTTATTTTCTGTAGCACAGAGATGACTTTAGTAAGTTGCAAGGCGAAGGCCTCAACGATTGTGGTTAATCTAT

B_rapa BnLRh1b (1) ----------------------------------------------------------------------------------------------------

B_juncea BnLRh1b (1) ----------------------------------------------------------------------------------------------------

B_napus BnLRh1b (1) ----------------------------------------------------------------------------------------------------

B_oleracea BnLRh1b (1) ----------------------------------------------------------------------------------------------------

4201 4300

Raphanus LR1-1 (3907) CTTGGTATCTTTGTGATGAGGTATGGCTTATCTGTGCTGGGGTGTGCTTGGGAGTCAAATGCTAGGGTCATGCGAAAAGTCCTATTTCCAATTCCGATCT

Raphanus LR1-2 (3907) CTTGGTATCTTTGTGATGAGGTATGGCTTATCTGTGCTGGGGTGTGCTTGGGAGTCAAATGCTAGGGTCATGCGAAAAGTCCTATTTCCAATTCCGATCT

Sinapis LR1-1 (4185) CTTGGTATCTTTGTGATGAGGTATGGCTTATCTGTGCTGGGGTGTGCTTGGGAGTCAAATGCTAGGGTCATGCGAAAAGTCCTATTTCCAATTCCGATCT

Sinapis LR1-2 (4185) CTTGGTATCTTTGTGATGAGGTATGGCTTATCTGTGCTGGGGTGTGCTTGGGAGTCAAATGCTAGGGTCATGCGAAAAGTCCTATTTCCAATTCCGATCT

B. nigra LR1-1 (3057) CTTGGTATCTTTGTGATGAGGTATGGCTTATCTGTGCTGGGGTGTGCTTGGGAGTCAAATGCTAGGGTCATGCGAAAAGTCCTATTTCCAATTCCGATCT

B. nigra LR1-2 (3060) CTTGGTATCTTTGTGATGAGGTATGGCTTATCTGTGCTGGGGTGTGCTTGGGAGTCAAATGCTAGGGTCATGCGAAAAGTCCTATTTCCAATTCCGATCT

B. carinata LR1-1 (3056) CTTGGTATCTTTGTGATGAGGTATGGCTTATCTGTGCTGGGGTGTGCTTGGGAGTCAAATGCTAGGGTCATGCGAAAAGTCCTATTTCCAATTCCGATCT

B. carinata LR1-2 (3056) CTTGGTATCTTTGTGATGAGGTATGGCTTATCTGTGCTGGGGTGTGCTTGGGAGTCAAATGCTAGGGTCATGCGAAAAGTCCTATTTCCAATTCCGATCT

B_rapa BnLRh1b (1) ----------------------------------------------------------------------------------------------------

B_juncea BnLRh1b (1) ----------------------------------------------------------------------------------------------------

B_napus BnLRh1b (1) ----------------------------------------------------------------------------------------------------

B_oleracea BnLRh1b (1) ----------------------------------------------------------------------------------------------------

4301 4400

Raphanus LR1-1 (4007) CATATCTAAGGAACGGGAGTTCTTAACAGAAGAAAGGCCATAGACTCCGTTTGGTACGTATCTGATATGTGACAAATCCTAAATCTGCAAGGTATCTTAT

Raphanus LR1-2 (4007) CATATCTAAGGAACGGGAGTTCTTAACAGAAGAAAGGCCATAGACTCCGTTTGGTACGTATCTGATATGTGACAAATCCTAAATCTGCAAGGTATCTTAT

Sinapis LR1-1 (4285) CATATCTAAGGAACGGGAGTTCTTAACAGAAGAAAGGCCATAGACTCCGTTTGGTACGTATCTGATATGTGACAAATCCTAAATCTGCAAGGTATCTTAT

Sinapis LR1-2 (4285) CATATCTAAGGAACGGGAGTTCTTAACAGAAGAAAGGCCATAGACTCCGTTTGGTACGTATCTGATATGTGACAAATCCTAAATCTGCAAGGTATCTTAT

B. nigra LR1-1 (3157) CATATCTAAGGAACGGGAGTTCTTAACAGAAGAAAGGCCATAGACTCCGTTTGGTACGTATCTGATATGTGACAAATCCTAAATCTGCAAGGTATCTTAT

B. nigra LR1-2 (3160) CATATCTAAGGAACGGGAGTTCTTAACAGAAGAAAGGCCATAGACTCCGTTTGGTACGTATCTGATATGTGACAAATCCTAAATCTGCAAGGTATCTTAT

B. carinata LR1-1 (3156) CATATCTAAGGAACGGGAGTTCTTAACAGAAGAAAGGCCATAGACTCCGTTTGGTACGTATCTGATATGTGACAAATCCTAAATCTGCAAGGTATCTTAT

B. carinata LR1-2 (3156) CATATCTAAGGAACGGGAGTTCTTAACAGAAGAAAGGCCATAGACTCCGTTTGGTACGTATCTGATATGTGACAAATCCTAAATCTGCAAGGTATCTTAT

B_rapa BnLRh1b (1) ----------------------------------------------------------------------------------------------------

B_juncea BnLRh1b (1) ----------------------------------------------------------------------------------------------------

B_napus BnLRh1b (1) ----------------------------------------------------------------------------------------------------

B_oleracea BnLRh1b (1) ----------------------------------------------------------------------------------------------------

4401 4500

Raphanus LR1-1 (4107) CTCTCTCAGTTATTAATATGGTGCTGGACTAGCGAAGCAACCCTTTTGAAGAAGGAATCTTAGGAGTTCTGCAGCATATGGATGGCTTAAAGGAAGAAAT

Raphanus LR1-2 (4107) CTCTCTCAGTTATTAATATGGTGCTGGACTAGCGAAGCAACCCTTTTGAAGAAGGAATCTTAGGAGTTCTGCAGCATATGGATGGCTTAAAGGAAGAAAT

Sinapis LR1-1 (4385) CTCTCTCAGTTATTAATATGGTGCTGGACTAGCGAAGCAACCCTTTTGAAGAAGGAATCTTAGGAGTTCTGCAGCATATGGATGGCTTAAAGGAAGAAAT

Sinapis LR1-2 (4385) CTCTCTCAGTTATTAATATGGTGCTGGACTAGCGAAGCAACCCTTTTGAAGAAGGAATCTTAGGAGTTCTGCAGCATATGGATGGCTTAAAGGAAGAAAT

B. nigra LR1-1 (3257) CTCTCTCAGTTATTAATATGGTGCTGGACTAGCGAAGCAACCCTTTTGAAGAAGGAATCTTAGGAGTTCTGCAGCATATGGATGGCTTAAAGGAAGAAAT

B. nigra LR1-2 (3260) CTCTCTCAGTTATTAATATGGTGCTGGACTAGCGAAGCAACCCTTTTGAAGAAGGAATCTTAGGAGTTCTGCAGCATATGGATGGCTTAAAGGAAGAAAT

B. carinata LR1-1 (3256) CTCTCTCAGTTATTAATATGGTGCTGGACTAGCGAAGCAACCCTTTTGAAGAAGGAATCTTAGGAGTTCTGCAGCATATGGATGGCTTAAAGGAAGAAAT

B. carinata LR1-2 (3256) CTCTCTCAGTTATTAATATGGTGCTGGACTAGCGAAGCAACCCTTTTGAAGAAGGAATCTTAGGAGTTCTGCAGCATATGGATGGCTTAAAGGAAGAAAT

B_rapa BnLRh1b (1) ----------------------------------------------------------------------------------------------------

B_juncea BnLRh1b (1) ----------------------------------------------------------------------------------------------------

B_napus BnLRh1b (1) ----------------------------------------------------------------------------------------------------

B_oleracea BnLRh1b (1) ----------------------------------------------------------------------------------------------------

4501 4600

Raphanus LR1-1 (4207) CAGACATCTGAGATAAGCAGGGCTGTTGTCTAATCTGAGGAATGCATACGAATCCTATAGTAAGTTCACGGGTAATTCTCCGCTTAGTTCAGTAATCTCC

Raphanus LR1-2 (4207) CAGACATCTGAGATAAGCAGGGCTGTTGTCTAATCTGAGGAATGCATACGAATCCTATAGTAAGTTCACGGGTAATTCTCCGCTTAGTTCAGTAATCTCC

Sinapis LR1-1 (4485) CAGACATCTGAGATAAGCAGGGCTGTTGTCTAATCTGAGGAATGCATACGAATCCTATAGTAAGTTCACGGGTAATTCTCCGCTTAGTTCAGTAATCTCC

Sinapis LR1-2 (4485) CAGACATCTGAGATAAGCAGGGCTGTTGTCTAATCTGAGGAATGCATACGAATCCTATAGTAAGTTCACGGGTAATTCTCCGCTTAGTTCAGTAATCTCC

B. nigra LR1-1 (3357) CAGACATCTGAGATAAGCAGGGCTGTTGTCTAATCTGAGGAATGCATACGAATCCTATAGTAAGTTCACGGGTAATTCTCCGCTTAGTTCAGTAATCTCC

B. nigra LR1-2 (3360) CAGACATCTGAGATAAGCAGGGCTGTTGTCTAATCTGAGGAATGCATACGAATCCTATAGTAAGTTCACGGGTAATTCTCCGCTTAGTTCAGTAATCTCC

B. carinata LR1-1 (3356) CAGACATCTGAGATAAGCAGGGCTGTTGTCTAATCTGAGGAATGCATACGAATCCTATAGTAAGTTCACGGGTAATTCTCCGCTTAGTTCAGTAATCTCC

B. carinata LR1-2 (3356) CAGACATCTGAGATAAGCAGGGCTGTTGTCTAATCTGAGGAATGCATACGAATCCTATAGTAAGTTCACGGGTAATTCTCCGCTTAGTTCAGTAATCTCC

B_rapa BnLRh1b (1) ----------------------------------------------------------------------------------------------------

B_juncea BnLRh1b (1) ----------------------------------------------------------------------------------------------------

B_napus BnLRh1b (1) ----------------------------------------------------------------------------------------------------

B_oleracea BnLRh1b (1) ----------------------------------------------------------------------------------------------------

4601 4700

Raphanus LR1-1 (4307) TGAAAGTTGGGTGAGCTATTCTGTTTTCCGAGGTACCAACACTTTCAACCACTTTATTTCCGAGGTCCTAAACCTTAAACCAGTTTTTAAACGCGATTAA

Raphanus LR1-2 (4307) TGAAAGTTGGGTGAGCTATTCTGTTTTCCGAGGTACCAACACTTTCAACCACTTTATTTCCGAGGTCCTAAACCTTAAACCAGTTTTTAAACGCGATTAA

Sinapis LR1-1 (4585) TGAAAGTTGGGTGAGCTATTCTGTTTTCCGAGGTACCAACACTTTCAACCACTTTATTTCCGAGGTCCTAAACCTTAAACCAGTTTTTAAACGCGATTAA

Sinapis LR1-2 (4585) TGAAAGTTGGGTGAGCTATTCTGTTTTCCGAGGTACCAACACTTTCAACCACTTTATTTCCGAGGTCCTAAACCTTAAACCAGTTTTTAAACGCGATTAA

B. nigra LR1-1 (3457) TGAAAGTTGGGTGAGCTATTCTGTTTTCCGAGGTACCAACACTTTCAACCACTTTATTTCCGAGGTCCTAAACCTTAAACCAGTTTTTAAACGCGATTAA

B. nigra LR1-2 (3460) TGAAAGTTGGGTGAGCTATTCTGTTTTCCGAGGTACCAACACTTTCAACCACTTTATTTCCGAGGTCCTAAACCTTAAACCAGTTTTTAAACGCGATTAA

B. carinata LR1-1 (3456) TGAAAGTTGGGTGAGCTATTCTGTTTTCCGAGGTACCAACACTTTCAACCACTTTATTTCCGAGGTCCTAAACCTTAAACCAGTTTTTAAACGCGATTAA

B. carinata LR1-2 (3456) TGAAAGTTGGGTGAGCTATTCTGTTTTCCGAGGTACCAACACTTTCAACCACTTTATTTCCGAGGTCCTAAACCTTAAACCAGTTTTTAAACGCGATTAA

B_rapa BnLRh1b (1) ----------------------------------------------------------------------------------------------------

B_juncea BnLRh1b (1) ----------------------------------------------------------------------------------------------------

B_napus BnLRh1b (1) ----------------------------------------------------------------------------------------------------

B_oleracea BnLRh1b (1) ----------------------------------------------------------------------------------------------------

4701 4800

Raphanus LR1-1 (4407) ACGCAGATCAGCGACATCCGTTTTCCAAGGACTAGCGAAGCAACCGTAAATCTGATACTTTGCTATAGTTTGCTACTTTTTCTGGGTATCGAGGAAGTAT

Raphanus LR1-2 (4407) ACGCAGATCAGCGACATCCGTTTTCCAAGGACTAGCGAAGCAACCGTAAATCTGATACTTTGCTATAGTTTGCTACTTTTTCTGGGTATCGAGGAAGTAT

Sinapis LR1-1 (4685) ACGCAGATCAGCGACATCCGTTTTCCAAGGACTAGCGAAGCAACCGTAAATCTGATACTTTGCTATAGTTTGCTACTTTTTCTGGGTATCGAGGAAGTAT

Sinapis LR1-2 (4685) ACGCAGATCAGCGACATCCGTTTTCCAAGGACTAGCGAAGCAACCGTAAATCTGATACTTTGCTATAGTTTGCTACTTTTTCTGGGTATCGAGGAAGTAT

B. nigra LR1-1 (3557) ACGCAGATCAGCGACATCCGTTTTCCAAGGACTAGCGAAGCAACCGTAAATCTGATACTTTGCTATAGTTTGCTACTTTTTCTGGGTATCGAGGAAGTAT

B. nigra LR1-2 (3560) ACGCAGATCAGCGACATCCGTTTTCCAAGGACTAGCGAAGCAACCGTAAATCTGATACTTTGCTATAGTTTGCTACTTTTTCTGGGTATCGAGGAAGTAT

B. carinata LR1-1 (3556) ACGCAGATCAGCGACATCCGTTTTCCAAGGACTAGCGAAGCAACCGTAAATCTGATACTTTGCTATAGTTTGCTACTTTTTCTGGGTATCGAGGAAGTAT

B. carinata LR1-2 (3556) ACGCAGATCAGCGACATCCGTTTTCCAAGGACTAGCGAAGCAACCGTAAATCTGATACTTTGCTATAGTTTGCTACTTTTTCTGGGTATCGAGGAAGTAT

B_rapa BnLRh1b (1) ----------------------------------------------------------------------------------------------------

B_juncea BnLRh1b (1) ----------------------------------------------------------------------------------------------------

B_napus BnLRh1b (1) ----------------------------------------------------------------------------------------------------

B_oleracea BnLRh1b (1) ----------------------------------------------------------------------------------------------------

4801 4900

Raphanus LR1-1 (4507) TCGAAGTCTGCCTTGGTTCAGCACACTATTCCGCGCATCTCCCACTCGCTTACTGGCAGAAGGTCTGCAAGCCTAGCCCCTTCTCTTTATCGAGGGCAAC

Raphanus LR1-2 (4507) TCGAAGTCTGCCTTGGTTCAGCACACTATTCCGCGCATCTCCCACTCGCTTACTGGCAGAAGGTCTGCAAGCCTAGCCCCTTCTCTTTATCGAGGGCAAC

Sinapis LR1-1 (4785) TCGAAGTCTGCCTTGGTTCAGCACACTATTCCGCGCATCTCCCACTCGCTTACTGGCAGAAGGTCTGCAAGCCTAGCCCCTTCTCTTTATCGAGGGCAAC

Sinapis LR1-2 (4785) TCGAAGTCTGCCTTGGTTCAGCACACTATTCCGCGCATCTCCCACTCGCTTACTGGCAGAAGGTCTGCAAGCCTAGCCCCTTCTCTTTATCGAGGGCAAC

B. nigra LR1-1 (3657) TCGAAGTCTGCCTTGGTTCAGCACACTATTCCGCGCATCTCCCACTCGCTTACTGGCAGAAGGTCTGCAAGCCTAGCCCCTTCTCTTTATCGAGGGCAAC

B. nigra LR1-2 (3660) TCGAAGTCTGCCTTGGTTCAGCACACTATTCCGCGCATCTCCCACTCGCTTACTGGCAGAAGGTCTGCAAGCCTAGCCCCTTCTCTTTATCGAGGGCAAC

B. carinata LR1-1 (3656) TCGAAGTCTGCCTTGGTTCAGCACACTATTCCGCGCATCTCCCACTCGCTTACTGGCAGAAGGTCTGCAAGCCTAGCCCCTTCTCTTTATCGAGGGCAAC

B. carinata LR1-2 (3656) TCGAAGTCTGCCTTGGTTCAGCACACTATTCCGCGCATCTCCCACTCGCTTACTGGCAGAAGGTCTGCAAGCCTAGCCCCTTCTCTTTATCGAGGGCAAC

B_rapa BnLRh1b (1) ----------------------------------------------------------------------------------------------------

B_juncea BnLRh1b (1) ----------------------------------------------------------------------------------------------------

B_napus BnLRh1b (1) ----------------------------------------------------------------------------------------------------

B_oleracea BnLRh1b (1) ----------------------------------------------------------------------------------------------------

4901 5000

Raphanus LR1-1 (4607) TCATGCTTATAGGGCACTCCCGGGATGGAACCAGCGATAATTACTTCCACTCAAAGGGATCGGATTATGAACCACTCCTAGCTGCTTTCTTTCAAACCTT

Raphanus LR1-2 (4607) TCATGCTTATAGGGCACTCCCGGGATGGAACCAGCGATAATTACTTCCACTCAAAGGGATCGGATTATGAACCACTCCTAGCTGCTTTCTTTCAAACCTT

Sinapis LR1-1 (4885) TCATGCTTATAGGGCACTCCCGGGATGGAACCAGCGATAATTACTTCCACTCAAAGGGATCGGATTATGAACCACTCCTAGCTGCTTTCTTTCAAACCTT

Sinapis LR1-2 (4885) TCATGCTTATAGGGCACTCCCGGGATGGAACCAGCGATAATTACTTCCACTCAAAGGGATCGGATTATGAACCACTCCTAGCTGCTTTCTTTCAAACCTT

B. nigra LR1-1 (3757) TCATGCTTATAGGGCACTCCCGGGATGGAACCAGCGATAATTACTTCCACTCAAAGGGATCGGATTATGAACCACTCCTAGCTGCTTTCTTTCAAACCTT

B. nigra LR1-2 (3760) TCATGCTTATAGGGCACTCCCGGGATGGAACCAGCGATAATTACTTCCACTCAAAGGGATCGGATTATGAACCACTCCTAGCTGCTTTCTTTCAAACCTT

B. carinata LR1-1 (3756) TCATGCTTATAGGGCACTCCCGGGATGGAACCAGCGATAATTACTTCCACTCAAAGGGATCGGATTATGAACCACTCCTAGCTGCTTTCTTTCAAACCTT

B. carinata LR1-2 (3756) TCATGCTTATAGGGCACTCCCGGGATGGAACCAGCGATAATTACTTCCACTCAAAGGGATCGGATTATGAACCACTCCTAGCTGCTTTCTTTCAAACCTT

B_rapa BnLRh1b (1) ----------------------------------------------------------------------------------------------------

B_juncea BnLRh1b (1) ----------------------------------------------------------------------------------------------------

B_napus BnLRh1b (1) ----------------------------------------------------------------------------------------------------

B_oleracea BnLRh1b (1) ----------------------------------------------------------------------------------------------------

5001 5100

Raphanus LR1-1 (4707) TCCATCTGAAGTTGATTCTATAGGTGCAGTTGCAGTTCTAGCTCTTTCTTTAGTTGCTGGAGATGTAATACGACTAGCATCAAGCCTTCCTTCTTCAGTA

Raphanus LR1-2 (4707) TCCATCTGAAGTTGATTCTATAGGTGCAGTTGCAGTTCTAGCTCTTTCTTTAGTTGCTGGAGATGTAATACGACTAGCATCAAGCCTTCCTTCTTCAGTA

Sinapis LR1-1 (4985) TCCATCTGAAGTTGATTCTATAGGTGCAGTTGCAGTTCTAGCTCTTTCTTTAGTTGCTGGAGATGTAATACGACTAGCATCAAGCCTTCCTTCTTCAGTA

Sinapis LR1-2 (4985) TCCATCTGAAGTTGATTCTATAGGTGCAGTTGCAGTTCTAGCTCTTTCTTTAGTTGCTGGAGATGTAATACGACTAGCATCAAGCCTTCCTTCTTCAGTA

B. nigra LR1-1 (3857) TCCATCTGAAGTTGATTCTATAGGTGCAGTTGCAGTTCTAGCTCTTTCTTTAGTTGCTGGAGATGTAATACGACTAGCATCAAGCCTTCCTTCTTCAGTA

B. nigra LR1-2 (3860) TCCATCTGAAGTTGATTCTATAGGTGCAGTTGCAGTTCTAGCTCTTTCTTTAGTTGCTGGAGATGTAATACGACTAGCATCAAGCCTTCCTTCTTCAGTA

B. carinata LR1-1 (3856) TCCATCTGAAGTTGATTCTATAGGTGCAGTTGCAGTTCTAGCTCTTTCTTTAGTTGCTGGAGATGTAATACGACTAGCATCAAGCCTTCCTTCTTCAGTA

B. carinata LR1-2 (3856) TCCATCTGAAGTTGATTCTATAGGTGCAGTTGCAGTTCTAGCTCTTTCTTTAGTTGCTGGAGATGTAATACGACTAGCATCAAGCCTTCCTTCTTCAGTA

B_rapa BnLRh1b (1) ----------------------------------------------------------------------------------------------------

B_juncea BnLRh1b (1) ----------------------------------------------------------------------------------------------------

B_napus BnLRh1b (1) ----------------------------------------------------------------------------------------------------

B_oleracea BnLRh1b (1) ----------------------------------------------------------------------------------------------------

5101 5200

Raphanus LR1-1 (4807) ATAGTTCCAGTGGAGGAAGAAGAAGAGCAGATCGCTTTAGACTGCCTCCCTTACTAAACAAGATAGGCTCGCTTCATCTGAGCCGTCGCCCCTTTCAATA

Raphanus LR1-2 (4807) ATAGTTCCAGTGGAGGAAGAAGAAGAGCAGATCGCTTTAGACTGCCTCCCTTACTAAACAAGATAGGCTCGCTTCATCTGAGCCGTCGCCCCTTTCAATA

Sinapis LR1-1 (5085) ATAGTTCCAGTGGAGGAAGAAGAAGAGCAGATCGCTTTAGACTGCCTCCCTTACTAAACAAGATAGGCTCGCTTCATCTGAGCCGTCGCCCCTTTCAATA

Sinapis LR1-2 (5085) ATAGTTCCAGTGGAGGAAGAAGAAGAGCAGATCGCTTTAGACTGCCTCCCTTACTAAACAAGATAGGCTCGCTTCATCTGAGCCGTCGCCCCTTTCAATA

B. nigra LR1-1 (3957) ATAGTTCCAGTGGAGGAAGAAGAAGAGCAGATCGCTTTAGACTGCCTCCCTTACTAAACAAGATAGGCTCGCTTCATCTGAGCCGTCGCCCCTTTCAATA

B. nigra LR1-2 (3960) ATAGTTCCAGTGGAGGAAGAAGAAGAGCAGATCGCTTTAGACTGCCTCCCTTACTAAACAAGATAGGCTCGCTTCATCTGAGCCGTCGCCCCTTTCAATA

B. carinata LR1-1 (3956) ATAGTTCCAGTGGAGGAAGAAGAAGAGCAGATCGCTTTAGACTGCCTCCCTTACTAAACAAGATAGGCTCGCTTCATCTGAGCCGTCGCCCCTTTCAATA

B. carinata LR1-2 (3956) ATAGTTCCAGTGGAGGAAGAAGAAGAGCAGATCGCTTTAGACTGCCTCCCTTACTAAACAAGATAGGCTCGCTTCATCTGAGCCGTCGCCCCTTTCAATA

B_rapa BnLRh1b (1) ----------------------------------------------------------------------------------------------------

B_juncea BnLRh1b (1) ----------------------------------------------------------------------------------------------------

B_napus BnLRh1b (1) ----------------------------------------------------------------------------------------------------

B_oleracea BnLRh1b (1) ----------------------------------------------------------------------------------------------------

5201 5300

Raphanus LR1-1 (4907) GGTGTAGGCATCGGGCCGATTCTCCTTTGCCTATCTTCCTGCTCTGCCAGTATACCTCCTTGCAAACCTCCCTTCCCTTAGCTTTCAATCTGTCTTGTGC

Raphanus LR1-2 (4907) GGTGTAGGCATCGGGCCGATTCTCCTTTGCCTATCTTCCTGCTCTGCCAGTATACCTCCTTGCAAACCTCCCTTCCCTTAGCTTTCAATCTGTCTTGTGC

Sinapis LR1-1 (5185) GGTGTAGGCATCGGGCCGATTCTCCTTTGCCTATCTTCCTGCTCTGCCAGTATACCTCCTTGCAAACCTCCCTTCCCTTAGCTTTCAATCTGTCTTGTGC

Sinapis LR1-2 (5185) GGTGTAGGCATCGGGCCGATTCTCCTTTGCCTATCTTCCTGCTCTGCCAGTATACCTCCTTGCAAACCTCCCTTCCCTTAGCTTTCAATCTGTCTTGTGC

B. nigra LR1-1 (4057) GGTGTAGGCATCGGGCCGATTCTCCTTTGCCTATCTTCCTGCTCTGCCAGTATACCTCCTTGCAAACCTCCCTTCCCTTAGCTTTCAATCTGTCTTGTGC

B. nigra LR1-2 (4060) GGTGTAGGCATCGGGCCGATTCTCCTTTGCCTATCTTCCTGCTCTGCCAGTATACCTCCTTGCAAACCTCCCTTCCCTTAGCTTTCAATCTGTCTTGTGC

B. carinata LR1-1 (4056) GGTGTAGGCATCGGGCCGATTCTCCTTTGCCTATCTTCCTGCTCTGCCAGTATACCTCCTTGCAAACCTCCCTTCCCTTAGCTTTCAATCTGTCTTGTGC

B. carinata LR1-2 (4056) GGTGTAGGCATCGGGCCGATTCTCCTTTGCCTATCTTCCTGCTCTGCCAGTATACCTCCTTGCAAACCTCCCTTCCCTTAGCTTTCAATCTGTCTTGTGC

B_rapa BnLRh1b (1) ----------------------------------------------------------------------------------------------------

B_juncea BnLRh1b (1) ----------------------------------------------------------------------------------------------------

B_napus BnLRh1b (1) ----------------------------------------------------------------------------------------------------

B_oleracea BnLRh1b (1) ----------------------------------------------------------------------------------------------------

5301 5400

Raphanus LR1-1 (5007) CACTCCAGCTTTCACTCAAGCCATTCTTTGAACATACTTTATAGGGGCGACCTTCACTCTTCTTCTCGCTTCCTAACCCTAAAAGCTCACTTCTTTTGGT

Raphanus LR1-2 (5007) CACTCCAGCTTTCACTCAAGCCATTCTTTGAACATACTTTATAGGGGCGACCTTCACTCTTCTTCTCGCTTCCTAACCCTAAAAGCTCACTTCTTTTGGT

Sinapis LR1-1 (5285) CACTCCAGCTTTCACTCAAGCCATTCTTTGAACATACTTTATAGGGGCGACCTTCACTCTTCTTCTCGCTTCCTAACCCTAAAAGCTCACTTCTTTTGGT

Sinapis LR1-2 (5285) CACTCCAGCTTTCACTCAAGCCATTCTTTGAACATACTTTATAGGGGCGACCTTCACTCTTCTTCTCGCTTCCTAACCCTAAAAGCTCACTTCTTTTGGT

B. nigra LR1-1 (4157) CACTCCAGCTTTCACTCAAGCCATTCTTTGAACATACTTTATAGGGGCGACCTTCACTCTTCTTCTCGCTTCCTAACCCTAAAAGCTCACTTCTTTTGGT

B. nigra LR1-2 (4160) CACTCCAGCTTTCACTCAAGCCATTCTTTGAACATACTTTATAGGGGCGACCTTCACTCTTCTTCTCGCTTCCTAACCCTAAAAGCTCACTTCTTTTGGT

B. carinata LR1-1 (4156) CACTCCAGCTTTCACTCAAGCCATTCTTTGAACATACTTTATAGGGGCGACCTTCACTCTTCTTCTCGCTTCCTAACCCTAAAAGCTCACTTCTTTTGGT

B. carinata LR1-2 (4156) CACTCCAGCTTTCACTCAAGCCATTCTTTGAACATACTTTATAGGGGCGACCTTCACTCTTCTTCTCGCTTCCTAACCCTAAAAGCTCACTTCTTTTGGT

B_rapa BnLRh1b (1) ----------------------------------------------------------------------------------------------------

B_juncea BnLRh1b (1) ----------------------------------------------------------------------------------------------------

B_napus BnLRh1b (1) ----------------------------------------------------------------------------------------------------

B_oleracea BnLRh1b (1) ----------------------------------------------------------------------------------------------------

5401 5500

Raphanus LR1-1 (5107) GTTGCTCCACGATCTTAAAGTGGAACTACGAGATAAATAAGCGGCGGGCTGATCTGACCTGCGCGTCTGCCTTCCTTTCGTCACTACGACTTGGTTTCGA

Raphanus LR1-2 (5107) GTTGCTCCACGATCTTAAAGTGGAACTACGAGATAAATAAGCGGCGGGCTGATCTGACCTGCGCGTCTGCCTTCCTTTCGTCACTACGACTTGGTTTCGA

Sinapis LR1-1 (5385) GTTGCTCCACGATCTTAAAGTGGAACTACGAGATAAATAAGCGGCGGGCTGATCTGACCTGCGCGTCTGCCTTCCTTTCGTCACTACGACTTGGTTTCGA

Sinapis LR1-2 (5385) GTTGCTCCACGATCTTAAAGTGGAACTACGAGATAAATAAGCGGCGGGCTGATCTGACCTGCGCGTCTGCCTTCCTTTCGTCACTACGACTTGGTTTCGA

B. nigra LR1-1 (4257) GTTGCTCCACGATCTTAAAGTGGAACTACGAGATAAATAAGCGGCGGGCTGATCTGACCTGCGCGTCTGCCTTCCTTTCGTCACTACGACTTGGTTTCGA

B. nigra LR1-2 (4260) GTTGCTCCACGATCTTAAAGTGGAACTACGAGATAAATAAGCGGCGGGCTGATCTGACCTGCGCGTCTGCCTTCCTTTCGTCACTACGACTTGGTTTCGA

B. carinata LR1-1 (4256) GTTGCTCCACGATCTTAAAGTGGAACTACGAGATAAATAAGCGGCGGGCTGATCTGACCTGCGCGTCTGCCTTCCTTTCGTCACTACGACTTGGTTTCGA

B. carinata LR1-2 (4256) GTTGCTCCACGATCTTAAAGTGGAACTACGAGATAAATAAGCGGCGGGCTGATCTGACCTGCGCGTCTGCCTTCCTTTCGTCACTACGACTTGGTTTCGA

B_rapa BnLRh1b (1) ----------------------------------------------------------------------------------------------------

B_juncea BnLRh1b (1) ----------------------------------------------------------------------------------------------------

B_napus BnLRh1b (1) ----------------------------------------------------------------------------------------------------

B_oleracea BnLRh1b (1) ----------------------------------------------------------------------------------------------------

5501 5600

Raphanus LR1-1 (5207) AAGAAGGAATGAGCGCTAGCCTAGCTAACTAGCATACCTTTCCTTGCCTCTTGCTCCGTAAAATGCTATCACATTTTGATTCCAATCATCTCATCTTTGT

Raphanus LR1-2 (5207) AAGAAGGAATGAGCGCTAGCCTAGCTAACTAGCATACCTTTCCTTGCCTCTTGCTCCGTAAAATGCTATCACATTTTGATTCCAATCATCTCATCTTTGT

Sinapis LR1-1 (5485) AAGAAGGAATGAGCGCTAGCCTAGCTAACTAGCATACCTTTCCTTGCCTCTTGCTCCGTAAAATGCTATCACATTTTGATTCCAATCATCTCATCTTTGT

Sinapis LR1-2 (5485) AAGAAGGAATGAGCGCTAGCCTAGCTAACTAGCATACCTTTCCTTGCCTCTTGCTCCGTAAAATGCTATCACATTTTGATTCCAATCATCTCATCTTTGT

B. nigra LR1-1 (4357) AAGAAGGAATGAGCGCTAGCCTAGCTAACTAGCATACCTTTCCTTGCCTCTTGCTCCGTAAAATGCTATCACATTTTGATTCCAATCATCTCATCTTTGT

B. nigra LR1-2 (4360) AAGAAGGAATGAGCGCTAGCCTAGCTAACTAGCATACCTTTCCTTGCCTCTTGCTCCGTAAAATGCTATCACATTTTGATTCCAATCATCTCATCTTTGT

B. carinata LR1-1 (4356) AAGAAGGAATGAGCGCTAGCCTAGCTAACTAGCATACCTTTCCTTGCCTCTTGCTCCGTAAAATGCTATCACATTTTGATTCCAATCATCTCATCTTTGT

B. carinata LR1-2 (4356) AAGAAGGAATGAGCGCTAGCCTAGCTAACTAGCATACCTTTCCTTGCCTCTTGCTCCGTAAAATGCTATCACATTTTGATTCCAATCATCTCATCTTTGT

B_rapa BnLRh1b (1) ----------------------------------------------------------------------------------------------------

B_juncea BnLRh1b (1) ----------------------------------------------------------------------------------------------------

B_napus BnLRh1b (1) ----------------------------------------------------------------------------------------------------

B_oleracea BnLRh1b (1) ----------------------------------------------------------------------------------------------------

5601 5700

Raphanus LR1-1 (5307) CCCGTTGAGAAGTTTAGTGGATGAACACTAGAATTGAGTTGCATGAAATACCTGGCAATTCTTGAGATAGGGCTCATCAGACTTTCTTAGTGAGAGTCCC

Raphanus LR1-2 (5307) CCCGTTGAGAAGTTTAGTGGATGAACACTAGAATTGAGTTGCATGAAATACCTGGCAATTCTTGAGATAGGGCTCATCAGACTTTCTTAGTGAGAGTCCC

Sinapis LR1-1 (5585) CCCGTTGAGAAGTTTAGTGGATGAACACTAGAATTGAGTTGCATGAAATACCTGGCAATTCTTGAGATAGGGCTCATCAGACTTTCTTAGTGAGAGTCCC

Sinapis LR1-2 (5585) CCCGTTGAGAAGTTTAGTGGATGAACACTAGAATTGAGTTGCATGAAATACCTGGCAATTCTTGAGATAGGGCTCATCAGACTTTCTTAGTGAGAGTCCC

B. nigra LR1-1 (4457) CCCGTTGAGAAGTTTAGTGGATGAACACTAGAATTGAGTTGCATGAAATACCTGGCAATTCTTGAGATAGGGCTCATCAGACTTTCTTAGTGAGAGTCCC

B. nigra LR1-2 (4460) CCCGTTGAGAAGTTTAGTGGATGAACACTAGAATTGAGTTGCATGAAATACCTGGCAATTCTTGAGATAGGGCTCATCAGACTTTCTTAGTGAGAGTCCC

B. carinata LR1-1 (4456) CCCGTTGAGAAGTTTAGTGGATGAACACTAGAATTGAGTTGCATGAAATACCTGGCAATTCTTGAGATAGGGCTCATCAGACTTTCTTAGTGAGAGTCCC

B. carinata LR1-2 (4456) CCCGTTGAGAAGTTTAGTGGATGAACACTAGAATTGAGTTGCATGAAATACCTGGCAATTCTTGAGATAGGGCTCATCAGACTTTCTTAGTGAGAGTCCC

B_rapa BnLRh1b (1) ----------------------------------------------------------------------------------------------------

B_juncea BnLRh1b (1) ----------------------------------------------------------------------------------------------------

B_napus BnLRh1b (1) ----------------------------------------------------------------------------------------------------

B_oleracea BnLRh1b (1) ----------------------------------------------------------------------------------------------------

5701 5800

Raphanus LR1-1 (5407) AGTGGTACAGACTATGTCAAAGCTGATCTTTGAAGTACGATCGGAGGAGATACCCGGCAGTGAAAGCTTTCCTCTCCTTTTAGTCGAGTTACGTCAGTAC

Raphanus LR1-2 (5407) AGTGGTACAGACTATGTCAAAGCTGATCTTTGAAGTACGATCGGAGGAGATACCCGGCAGTGAAAGCTTTCCTCTCCTTTTAGTCGAGTTACGTCAGTAC

Sinapis LR1-1 (5685) AGTGGTACAGACTATGTCAAAGCTGATCTTTGAAGTACGATCGGAGGAGATACCCGGCAGTGAAAGCTTTCCTCTCCTTTTAGTCGAGTTACGTCAGTAC

Sinapis LR1-2 (5685) AGTGGTACAGACTATGTCAAAGCTGATCTTTGAAGTACGATCGGAGGAGATACCCGGCAGTGAAAGCTTTCCTCTCCTTTTAGTCGAGTTACGTCAGTAC

B. nigra LR1-1 (4557) AGTGGTACAGACTATGTCAAAGCTGATCTTTGAAGTACGATCGGAGGAGATACCCGGCAGTGAAAGCTTTCCTCTCCTTTTAGTCGAGTTACGTCAGTAC

B. nigra LR1-2 (4560) AGTGGTACAGACTATGTCAAAGCTGATCTTTGAAGTACGATCGGAGGAGATACCCGGCAGTGAAAGCTTTCCTCTCCTTTTAGTCGAGTTACGTCAGTAC

B. carinata LR1-1 (4556) AGTGGTACAGACTATGTCAAAGCTGATCTTTGAAGTACGATCGGAGGAGATACCCGGCAGTGAAAGCTTTCCTCTCCTTTTAGTCGAGTTACGTCAGTAC

B. carinata LR1-2 (4556) AGTGGTACAGACTATGTCAAAGCTGATCTTTGAAGTACGATCGGAGGAGATACCCGGCAGTGAAAGCTTTCCTCTCCTTTTAGTCGAGTTACGTCAGTAC

B_rapa BnLRh1b (1) ----------------------------------------------------------------------------------------------------

B_juncea BnLRh1b (1) ----------------------------------------------------------------------------------------------------

B_napus BnLRh1b (1) ----------------------------------------------------------------------------------------------------

B_oleracea BnLRh1b (1) ----------------------------------------------------------------------------------------------------

5801 5900

Raphanus LR1-1 (5507) CTCTCGCAATAAATGCTCGAGTTCCCTCTTTTAAAAGAGTAATAAATTACCTTGGACCCTATCCTCTCTGATAGATGATCTTGCTTGGGCCACTGAAGAA

Raphanus LR1-2 (5507) CTCTCGCAATAAATGCTCGAGTTCCCTCTTTTAAAAGAGTAATAAATTACCTTGGACCCTATCCTCTCTGATAGATGATCTTGCTTGGGCCACTGAAGAA

Sinapis LR1-1 (5785) CTCTCGCAATAAATGCTCGAGTTCCCTCTTTTAAAAGAGTAATCAATTACCTTGGACCCTATCCTCTCTGATAGATGATCTTGCTTGGGCCACTGAAGAA

Sinapis LR1-2 (5785) CTCTCGCAATAAATGCTCGAGTTCCCTCTTTTAAAAGAGTAATCAATTACCTTGGACCCTATCCTCTCTGATAGATGATCTTGCTTGGGCCACTGAAGAA

B. nigra LR1-1 (4657) CTCTCGCAATAAATGCTCGAGTTCCCTCTTTTAAAAGAGTAATAAATTACCTTGGACCCTATCCTCTCTGATAGATGATCTTGCTTGGGCCACTGAAGAA

B. nigra LR1-2 (4660) CTCTCGCAATAAATGCTCGAGTTCCCTCTTTTAAAAGAGTAATAAATTACCTTGGACCCTATCCTCTCTGATAGATGATCTTGCTTGGGCCACTGAAGAA

B. carinata LR1-1 (4656) CTCTCGCAATAAATGCTCGAGTTCCCTCTTTTAAAAGAGTAATAAATTACCTTGGACCCTATCCTCTCTGATAGATGATCTTGCTTGGGCCACTGAAGAA

B. carinata LR1-2 (4656) CTCTCGCAATAAATGCTCGAGTTCCCTCTTTTAAAAGAGTAATAAATTACCTTGGACCCTATCCTCTCTGATAGATGATCTTGCTTGGGCCACTGAAGAA

B_rapa BnLRh1b (1) ------------------------------------------------ACCTTGGACCCTATCCTCTCTGATAGATGATCTTGCTTGGGCCACTGAAGAA

B_juncea BnLRh1b (1) ------------------------------------------------ACCTTGGACCCTATCCTCTCTGATAGATGATCTTGCTTGGGCCACTGAAGAA

B_napus BnLRh1b (1) ------------------------------------------------ACCTTGGACCCTATCCTCTCTGATAGATGATCTTGCTTGGGCCACTGAAGAA

B_oleracea BnLRh1b (1) ------------------------------------------------ACCTTGGACCCTATCCTCTCTGATAGATGATCTTGCTTGGGCCACTGAAGAA

5901 6000

Raphanus LR1-1 (5607) GAAGAATATTGAGGAATTGGACTTAGCATTCTATCTAATGCTTTGATCCATCTAAGCCCATTGACAAGCAGGAAGAGGAGAGGGGGCTTTTGGGATAATT

Raphanus LR1-2 (5607) GAAGAATATTGAGGAATTGGACTTAGCATTCTATCTAATGCTTTGATCCATCTAAGCCCATTGACAAGCAGGAAGAGGAGAGGGGGCTTTTGGGATAATT

Sinapis LR1-1 (5885) GAAGAATATTGAGGAATTGGACTTAGCATTCTATCTAATGCTTTGATCCATCTAAGCCCATTGACAAGCAGGAAGAGGAGAGGGGGCTTTTGGGATAATT

Sinapis LR1-2 (5885) GAAGAATATTGAGGAATTGGACTTAGCATTCTATCTAATGCTTTGATCCATCTAAGCCCATTGACAAGCAGGAAGAGGAGAGGGGGCTTTTGGGATAATT

B. nigra LR1-1 (4757) GAAGAATATTGAGGAATTGGACTTAGCATTCTATCTAATGCTTTGATCCATCTAAGCCCATTGACAAGCAGGAAGAGGAGAGGGGGCTTTTGGGATAATT

B. nigra LR1-2 (4760) GAAGAATATTGAGGAATTGGACTTAGCATTCTATCTAATGCTTTGATCCATCTAAGCCCATTGACAAGCAGGAAGAGGAGAGGGGGCTTTTGGGATAATT

B. carinata LR1-1 (4756) GAAGAATATTGAGGAATTGGACTTAGCATTCTATCTAATGCTTTGATCCATCTAAGCCCATTGACAAGCAGGAAGAGGAGAGGGGGCTTTTGGGATAATT

B. carinata LR1-2 (4756) GAAGAATATTGAGGAATTGGACTTAGCATTCTATCTAATGCTTTGATCCATCTAAGCCCATTGACAAGCAGGAAGAGGAGAGGGGGCTTTTGGGATAATT

B_rapa BnLRh1b (53) GAAGAATATTGAGGAATTGGACTTAGCATTCTATCTAATGCTTTGATCCATCTAAGCCCATTGACAAGCAGGAAGAGGAGAGGGGGCTTTTGGGATAATT

B_juncea BnLRh1b (53) GAAGAATATTGAGGAATTGGACTTAGCATTCTATCTAATGCTTTGATCCATCTAAGCCCATTGACAAGCAGGAAGAGGAGAGGGGGCTTTTGGGATAATT

B_napus BnLRh1b (53) GAAGAATATTGAGGAATTGGACTTAGCATTCTATCTAATGCTTTGATCCATCTAAGCCCATTGACAAGCAGGAAGAGGAGAGGGGGCTTTTGGGATAATT

B_oleracea BnLRh1b (53) GAAGAATATTGAGGAATTGGACTTAGCATTCTATCTAATGCTTTGATCCATCTAAGCCCATTGACAAGCAGGAAGAGGAGAGGGGGCTTTTGGGATAATT

6001 6100

Raphanus LR1-1 (5707) ATGATACTGAGCCCAATGGAAAAGCCCACGCCCGAGTCCAAAATGGAATTACTGGGGAAACGAATCCAAGAAAGCCCAAAAACAAAAGTGTGGAGAAGGG

Raphanus LR1-2 (5707) ATGATACTGAGCCCAATGGAAAAGCCCACGCCCGAGTCCAAAATGGAATTACTGGGGAAACGAATCCAAGAAAGCCCAAAAACAAAAGTGTGGAGAAGGG

Sinapis LR1-1 (5985) ATGATACTGAGCCCAATGGAAAAGCCCACGCCCGAGTCCAAAATGGAATTACTGGGGAAACGAATCCAAGAAAGCCCAAAAACAAAAGTGTGGAGAAGGG

Sinapis LR1-2 (5985) ATGATACTGAGCCCAATGGAAAAGCCCACGCCCGAGTCCAAAATGGAATTACTGGGGAAACGAATCCAAGAAAGCCCAAAAACAAAAGTGTGGAGAAGGG

B. nigra LR1-1 (4857) ATGATACTGAGCCCAATGGAAAAGCCCACGCCCGAGTCCAAAATGGAATTACTGGGGAAACGAATCCAAGAAAGCCCAAAAACAAAAGTGTGGAGAAGGG

B. nigra LR1-2 (4860) ATGATACTGAGCCCAATGGAAAAGCCCACGCCCGAGTCCAAAATGGAATTACTGGGGAAACGAATCCAAGAAAGCCCAAAAACAAAAGTGTGGAGAAGGG

B. carinata LR1-1 (4856) ATGATACTGAGCCCAATGGAAAAGCCCACGCCCGAGTCCAAAATGGAATTACTGGGGAAACGAATCCAAGAAAGCCCAAAAACAAAAGTGTGGAGAAGGG

B. carinata LR1-2 (4856) ATGATACTGAGCCCAATGGAAAAGCCCACGCCCGAGTCCAAAATGGAATTACTGGGGAAACGAATCCAAGAAAGCCCAAAAACAAAAGTGTGGAGAAGGG

B_rapa BnLRh1b (153) ATGATACTGAGCCCAATGGAAAAGCCCACGCCCGAGTCCAAAATGGAATTACTGGGGAAACGAATCCAAGAAAGCCCAAAAACAAAAGTGTGGAGAAGGG

B_juncea BnLRh1b (153) ATGATACTGAGCCCAATGGAAAAGCCCACGCCCGAGTCCAAAATGGAATTACTGGGGAAACGAATCCAAGAAAGCCCAAAAACAAAAGTGTGGAGAAGGG

B_napus BnLRh1b (153) ATGATACTGAGCCCAATGGAAAAGCCCACGCCCGAGTCCAAAATGGAATTACTGGGGAAACGAATCCAAGAAAGCCCAAAAACAAAAGTGTGGAGAAGGG

B_oleracea BnLRh1b (153) ATGATACTGAGCCCAATGGAAAAGCCCACGCCCGAGTCCAAAATGGAATTACTGGGGAAACGAATCCAAGAAAGCCCAAAAACAAAAGTGTGGAGAAGGG

6101 6200

Raphanus LR1-1 (5807) GACTTATTGTACTGAAAAAGTGATTGTGCTCATTTACTCTATACGCGTCTTAGTGGACTGACAGAGTGAGCTGGAAAGGTTCCGTCTTTCCGGGGAAATT

Raphanus LR1-2 (5807) GACTTATTGTACTGAAAAAGTGATTGTGCTCATTTACTCTATACGCGTCTTAGTGGACTGACAGAGTGAGCTGGAAAGGTTCCGTCTTTCCGGGGAAATT

Sinapis LR1-1 (6085) GACTTATTGTACTGAAAAAGTTATTGTGCTCATTTACTCTATACGCGTCTTAGTGGACTGACAGAGTGAGCTGGAAAGGTTCCGTCTTTCCGGGGAAATT

Sinapis LR1-2 (6085) GACTTATTGTACTGAAAAAGTTATTGTGCTCATTTACTCTATACGCGTCTTAGTGGACTGACAGAGTGAGCTGGAAAGGTTCCGTCTTTCCGGGGAAATT

B. nigra LR1-1 (4957) GACTTATTGTACTGAAAAAGTTATTGTGCTCATTTACTCTATACGCGTCTTAGTGGACTGACAGAGTGAGCTGGAAAGGTTCCGTCTTTCCGGGGAAATT

B. nigra LR1-2 (4960) GACTTATTGTACTGAAAAAGTTATTGTGCTCATTTACTCTATACGCGTCTTAGTGGACTGACAGAGTGAGCTGGAAAGGTTCCGTCTTTCCGGGGAAATT

B. carinata LR1-1 (4956) GACTTATTGTACTGAAAAAGTTATTGTGCTCATTTACTCTATACGCGTCTTAGTGGACTGACAGAGTGAGCTGGAAAGGTTCCGTCTTTCCGGGGAAATT

B. carinata LR1-2 (4956) GACTTATTGTACTGAAAAAGTTATTGTGCTCATTTACTCTATACGCGTCTTAGTGGACTGACAGAGTGAGCTGGAAAGGTTCCGTCTTTCCGGGGAAATT

B_rapa BnLRh1b (253) GACTTATTGTACTGAAAAAGTTATTGTGCTCATTTACTCTATACGCGTCTTAGTGGACTGACAGAGTGAGCTGGAAAGGTTCCGTCTTTCCGGGGAAATT

B_juncea BnLRh1b (253) GACTTATTGTACTGAAAAAGTTATTGTGCTCATTTACTCTATACGCGTCTTAGTGGACTGACAGAGTGAGCTGGAAAGGTTCCGTCTTTCCGGGGAAATT

B_napus BnLRh1b (253) GACTTATTGTACTGAAAAAGTTATTGTGCTCATTTACTCTATACGCGTCTTAGTGGACTGACAGAGTGAGCTGGAAAGGTTCCGTCTTTCCGGGGAAATT

B_oleracea BnLRh1b (253) GACTTATTGTACTGAAAAAGTTATTGTGCTCATTTACTCTATACGCGTCTTAGTGGACTGACAGAGTGAGCTGGAAAGGTTCCGTCTTTCCGGGGAAATT

6201 6300

Raphanus LR1-1 (5907) CAAGAGAGCTAGCTTCGGTGCTCACCAAAGGACGGAGCTGTCGAGTAAGGATTGGCCGAAGTCAGTTACCTGGGAATCAGCCAATAAAAAATAGACAAAT

Raphanus LR1-2 (5907) CAAGAGAGCTAGCTTCGGTGCTCACCAAAGGACGGAGCTGTCGAGTAAGGATTGGCCGAAGTCAGTTACCTGGGAATCAGCCAATAAAAAATAGACAAAT

Sinapis LR1-1 (6185) CAAGAGAGCTAGCTTCGGTGCTCACCAAAGGACGGAGCTGTCGAGTAAGGATTGGCCGAAGTCAGTTACCTGGGAATCAGCCAATAAAAAATAGACAAAT

Sinapis LR1-2 (6185) CAAGAGAGCTAGCTTCGGTGCTCACCAAAGGACGGAGCTGTCGAGTAAGGATTGGCCGAAGTCAGTTACCTGGGAATCAGCCAATAAAAAATAGACAAAT

B. nigra LR1-1 (5057) CAAGAGAGCTAGCTTCGGTGCTCACCAAAGGACGGAGCTGTCGAGTAAGGATTGGCCGAAGTCAGTTACCTGGGAATCAGCCAATAAAAAATAGACAAAT

B. nigra LR1-2 (5060) CAAGAGAGCTAGCTTCGGTGCTCACCAAAGGACGGAGCTGTCGAGTAAGGATTGGCCGAAGTCAGTTACCTGGGAATCAGCCAATAAAAAATAGACAAAT

B. carinata LR1-1 (5056) CAAGAGAGCTAGCTTCGGTGCTCACCAAAGGACGGAGCTGTCGAGTAAGGATTGGCCGAAGTCAGTTACCTGGGAATCAGCCAATAAAAAATAGACAAAT

B. carinata LR1-2 (5056) CAAGAGAGCTAGCTTCGGTGCTCACCAAAGGACGGAGCTGTCGAGTAAGGATTGGCCGAAGTCAGTTACCTGGGAATCAGCCAATAAAAAATAGACAAAT

B_rapa BnLRh1b (353) CAAGAGAGCTAGCTTCGGTGCTCACCAAAGGACGGAGCTGTCGAGTAAGGATTGGCCGAAGTCAGTTACCTGGGAATCAGCCAATAAAAAATAGACAAAT

B_juncea BnLRh1b (353) CAAGAGAGCTAGCTTCGGTGCTCACCAAAGGACGGAGCTGTCGAGTAAGGATTGGCCGAAGTCAGTTACCTGGGAATCAGCCAATAAAAAATAGACAAAT

B_napus BnLRh1b (353) CAAGAGAGCTAGCTTCGGTGCTCACCAAAGGACGGAGCTGTCGAGTAAGGATTGGCCGAAGTCAGTTACCTGGGAATCAGCCAATAAAAAATAGACAAAT

B_oleracea BnLRh1b (353) CAAGAGAGCTAGCTTCGGTGCTCACCAAAGGACGGAGCTGTCGAGTAAGGATTGGCCGAAGTCAGTTACCTGGGAATCAGCCAATAAAAAATAGACAAAT

6301 6400

Raphanus LR1-1 (6007) AAAAGCGTGATCTGAGTAGGCAGAGCTAAATAGTGCACGTAGGGTAAACGAGGACTCTGGTCAGCTTTGAGCTGTCGAGTAAGGAGTGACGGGCCTTTGG

Raphanus LR1-2 (6007) AAAAGCGTGATCTGAGTAGGCAGAGCTAAATAGTGCACGTAGGGTAAACGAGGACTCTGGTCAGCTTTGAGCTGTCGAGTAAGGAGTGACGGGCCTTTGG

Sinapis LR1-1 (6285) AAAAGCGTGATCTGAGTAGGCAGAGCTAAATAGTGCACGTAGGGTAAACGAGGACTCTGGTCAGCTTTGAGCTGTCGAGTAAGGAGTGACGGGCCTTTGG

Sinapis LR1-2 (6285) AAAAGCGTGATCTGAGTAGGCAGAGCTAAATAGTGCACGTAGGGTAAACGAGGACTCTGGTCAGCTTTGAGCTGTCGAGTAAGGAGTGACGGGCCTTTGG

B. nigra LR1-1 (5157) AAAAGCGTGATCTGAGTAGGCAGAGCTAAATAGTGCACGTAGGGTAAACGAGGACTCTGGTCAGCTTTGAGCTGTCGAGTAAGGAGTGACGGGCCTTTGG

B. nigra LR1-2 (5160) AAAAGCGTGATCTGAGTAGGCAGAGCTAAATAGTGCACGTAGGGTAAACGAGGACTCTGGTCAGCTTTGAGCTGTCGAGTAAGGAGTGACGGGCCTTTGG

B. carinata LR1-1 (5156) AAAAGCGTGATCTGAGTAGGCAGAGCTAAATAGTGCACGTAGGGTAAACGAGGACTCTGGTCAGCTTTGAGCTGTCGAGTAAGGAGTGACGGGCCTTTGG

B. carinata LR1-2 (5156) AAAAGCGTGATCTGAGTAGGCAGAGCTAAATAGTGCACGTAGGGTAAACGAGGACTCTGGTCAGCTTTGAGCTGTCGAGTAAGGAGTGACGGGCCTTTGG

B_rapa BnLRh1b (453) AAAAGCGTGATCTGAGTAGGCAGAGCTAAATAGTGCACGTAGGGTAAACGAGGACTCTGGTCAGCTTTGAGCTGTCGAGTAAGGAGTGACGGGCCTTTGG

B_juncea BnLRh1b (453) AAAAGCGTGATCTGAGTAGGCAGAGCTAAATAGTGCACGTAGGGTAAACGAGGACTCTGGTCAGCTTTGAGCTGTCGAGTAAGGAGTGACGGGCCTTTGG

B_napus BnLRh1b (453) AAAAGCGTGATCTGAGTAGGCAGAGCTAAATAGTGCACGTAGGGTAAACGAGGACTCTGGTCAGCTTTGAGCTGTCGAGTAAGGAGTGACGGGCCTTTGG

B_oleracea BnLRh1b (453) AAAAGCGTGATCTGAGTAGGCAGAGCTAAATAGTGCACGTAGGGTAAACGAGGACTCTGGTCAGCTTTGAGCTGTCGAGTAAGGAGTGACGGGCCTTTGG

6401 6500

Raphanus LR1-1 (6107) AAACCCGAGAAAAGCGGGGGAGTACTCTATACAGTGCGTTCTATTATTGCCTCTTATTCCCGAGGGAGTGGTCGTAATTAAGCCGCGTGGCAATACCCGC

Raphanus LR1-2 (6107) AAACCCGAGAAAAGCGGGGGAGTACTCTATACAGTGCGTTCTATTATTGCCTCTTATTCCCGAGGGAGTGGTCGTAATTAAGCCGCGTGGCAATACCCGC

Sinapis LR1-1 (6385) AAACCCGAGAAAAGCGGGGGAGTACTCTATACAGTGCGTTCTATTATTGCCTCTTATTCCCGAGGGAGTGGTCGTAATTAAGCCGCGTGGCAATACCCGC

Sinapis LR1-2 (6385) AAACCCGAGAAAAGCGGGGGAGTACTCTATACAGTGCGTTCTATTATTGCCTCTTATTCCCGAGGGAGTGGTCGTAATTAAGCCGCGTGGCAATACCCGC

B. nigra LR1-1 (5257) AAACCCGAGAAAAGCGGGGGAGTACTCTATACAGTGCGTTCTATTATTGCCTCTTATTCCCGAGGGAGTGGTCGTAATTAAGCCGCGTGGCAATACCCGC

B. nigra LR1-2 (5260) AAACCCGAGAAAAGCGGGGGAGTACTCTATACAGTGCGTTCTATTATTGCCTCTTATTCCCGAGGGAGTGGTCGTAATTAAGCCGCGTGGCAATACCCGC

B. carinata LR1-1 (5256) AAACCCGAGAAAAGCGGGGGAGTACTCTATACAGTGCGTTCTATTATTGCCTCTTATTCCCGAGGGAGTGGTCGTAATTAAGCCGCGTGGCAATACCCGC

B. carinata LR1-2 (5256) AAACCCGAGAAAAGCGGGGGAGTACTCTATACAGTGCGTTCTATTATTGCCTCTTATTCCCGAGGGAGTGGTCGTAATTAAGCCGCGTGGCAATACCCGC

B_rapa BnLRh1b (553) AAACCCGAGAAAAGCGGGGGAGTACTCTATACAGTGCGTTCTATTATTGCCTCTTATTCCCGAGGGAGTGGTCGTAATTAAGCCGCGTGGCAATACCCGC

B_juncea BnLRh1b (553) AAACCCGAGAAAAGCGGGGGAGTACTCTATACAGTGCGTTCTATTATTGCCTCTTATTCCCGAGGGAGTGGTCGTAATTAAGCCGCGTGGCAATACCCGC

B_napus BnLRh1b (553) AAACCCGAGAAAAGCGGGGGAGTACTCTATACAGTGCGTTCTATTATTGCCTCTTATTCCCGAGGGAGTGGTCGTAATTAAGCCGCGTGGCAATACCCGC

B_oleracea BnLRh1b (553) AAACCCGAGAAAAGCGGGGGAGTACTCTATACAGTGCGTTCTATTATTGCCTCTTATTCCCGAGGGAGTGGTCGTAATTAAGCCGCGTGGCAATACCCGC

6501 6600

Raphanus LR1-1 (6207) CAAAAAGGACTCTTTGATTTTGAGGGGCGGGGCCTTTATCCAGGGGAGAATTCTTCAGCGCACTAAAATCTAGTTAAGGGGGTTCCATATTCATGAAAAG

Raphanus LR1-2 (6207) CAAAAAGGACTCTTTGATTTTGAGGGGCGGGGCCTTTATCCAGGGGAGAATTCTTCAGCGCACTAAAATCTAGTTAAGGGGGTTCCATATTCATGAAAAG

Sinapis LR1-1 (6485) CAAAAAGGACTCTTTGATTTTGAGGGGCGGGGCCTTTATCCAGGGGAGAATTCTTCAGCGCACTAAAATCTAGTTAAGGGGGTTCCATATTCATGAAAAG

Sinapis LR1-2 (6485) CAAAAAGGACTCTTTGATTTTGAGGGGCGGGGCCTTTATCCAGGGGAGAATTCTTCAGCGCACTAAAATCTAGTTAAGGGGGTTCCATATTCATGAAAAG

B. nigra LR1-1 (5357) CAAAAAGGACTCTTTGATTTTGAGGGGCGGGGCCTTTATCCAGGGGAGAATTCTTCAGCGCACTAAAATCTAGTTAAGGGGGTTCCATATTCATGAAAAG

B. nigra LR1-2 (5360) CAAAAAGGACTCTTTGATTTTGAGGGGCGGGGCCTTTATCCAGGGGAGAATTCTTCAGCGCACTAAAATCTAGTTAAGGGGGTTCCATATTCATGAAAAG

B. carinata LR1-1 (5356) CAAAAAGGACTCTTTGATTTTGAGGGGCGGGGCCTTTATCCAGGGGAGAATTCTTCAGCGCACTAAAATCTAGTTAAGGGGGTTCCATATTCATGAAAAG

B. carinata LR1-2 (5356) CAAAAAGGACTCTTTGATTTTGAGGGGCGGGGCCTTTATCCAGGGGAGAATTCTTCAGCGCACTAAAATCTAGTTAAGGGGGTTCCATATTCATGAAAAG

B_rapa BnLRh1b (653) CAAAAAGGACTCTTTGATTTTGAGGGGCGGGGCCTTTATCCAGGGGAGAATTCTTCAGCGCACTAAAATCTAGTTAAGGGGGTTCCATATTCATGAAAAG

B_juncea BnLRh1b (653) CAAAAAGGACTCTTTGATTTTGAGGGGCGGGGCCTTTATCCAGGGGAGAATTCTTCAGCGCACTAAAATCTAGTTAAGGGGGTTCCATATTCATGAAAAG

B_napus BnLRh1b (653) CAAAAAGGACTCTTTGATTTTGAGGGGCGGGGCCTTTATCCAGGGGAGAATTCTTCAGCGCACTAAAATCTAGTTAAGGGGGTTCCATATTCATGAAAAG

B_oleracea BnLRh1b (653) CAAAAAGGACTCTTTGATTTTGAGGGGCGGGGCCTTTATCCAGGGGAGAATTCTTCAGCGCACTAAAATCTAGTTAAGGGGGTTCCATATTCATGAAAAG

6601 6700

Raphanus LR1-1 (6307) CCGGGGTTGAACCATGTTACGGAACTAAGACAAGAATTATGACTAATAAGAAAGGGTTTAGGGCCTGCCTATAAATAGAAGCTTCTTTCAGTCTCTATTT

Raphanus LR1-2 (6307) CCGGGGTTGAACCATGTTACGGAACTAAGACAAGAATTATGACTAATAAGAAAGGGTTTAGGGCCTGCCTATAAATAGAAGCTTCTTTCAGTCTCTATTT

Sinapis LR1-1 (6585) CCGGGGTTGAACCATGTTACGGAACTAAGACAAGAATTATGACTAATAAGAAAGGGTTTAGGGCCTGCCTATAAATAGAAGCTTCTTTCAGTCTCTATTT

Sinapis LR1-2 (6585) CCGGGGTTGAACCATGTTACGGAACTAAGACAAGAATTATGACTAATAAGAAAGGGTTTAGGGCCTGCCTATAAATAGAAGCTTCTTTCAGTCTCTATTT

B. nigra LR1-1 (5457) CCGGGGTTGAACCATGTTACGGAACTAAGACAAGAATTATGACTAATAAGAAAGGGTTTAGGGCCTGCCTATAAATAGAAGCTTCTTTCAGTCTCTATTT

B. nigra LR1-2 (5460) CCGGGGTTGAACCATGTTACGGAACTAAGACAAGAATTATGACTAATAAGAAAGGGTTTAGGGCCTGCCTATAAATAGAAGCTTCTTTCAGTCTCTATTT

B. carinata LR1-1 (5456) CCGGGGTTGAACCATGTTACGGAACTAAGACAAGAATTATGACTAATAAGAAAGGGTTTAGGGCCTGCCTATAAATAGAAGCTTCTTTCAGTCTCTATTT

B. carinata LR1-2 (5456) CCGGGGTTGAACCATGTTACGGAACTAAGACAAGAATTATGACTAATAAGAAAGGGTTTAGGGCCTGCCTATAAATAGAAGCTTCTTTCAGTCTCTATTT

B_rapa BnLRh1b (753) CCGGGGTTGAACCATGTTACGGAACTAAGACAAGAATTATGACTAATAAGAAAGGGTTTAGGGCCTGCCTATAAATAGAAGCTTCTTTCAGTCTCTATTT

B_juncea BnLRh1b (753) CCGGGGTTGAACCATGTTACGGAACTAAGACAAGAATTATGACTAATAAGAAAGGGTTTAGGGCCTGCCTATAAATAGAAGCTTCTTTCAGTCTCTATTT

B_napus BnLRh1b (753) CCGGGGTTGAACCATGTTACGGAACTAAGACAAGAATTATGACTAATAAGAAAGGGTTTAGGGCCTGCCTATAAATAGAAGCTTCTTTCAGTCTCTATTT

B_oleracea BnLRh1b (753) CCGGGGTTGAACCATGTTACGGAACTAAGACAAGAATTATGACTAATAAGAAAGGGTTTAGGGCCTGCCTATAAATAGAAGCTTCTTTCAGTCTCTATTT

6701 6800

Raphanus LR1-1 (6407) GGCAAAGAGGGCACTTAGAAGTCGGCAAGAAAGTGAGTAGACATGGATATCGCGAACAGACTGGCGAGCATTCAACAAGAAATACAAACCGTGGAAAACG

Raphanus LR1-2 (6407) GGCAAAGAGGGCACTTAGAAGTCGGCAAGAAAGTGAGTAGACATGGATATCGCGAACAGACTGGCGAGCATTCAACAAGAAATACAAACCGTGGAAAACG

Sinapis LR1-1 (6685) GGCAAAGAGGGCACTTAGAAGTCGGCAAGAAAGTGAGTAGACATGGATATCGCGAACAGACTGGCGAGCATTCAACAAGAAATACAAACCGTGGAAAACG

Sinapis LR1-2 (6685) GGCAAAGAGGGCACTTAGAAGTCGGCAAGAAAGTGAGTAGACATGGATATCGCGAACAGACTGGCGAGCATTCAACAAGAAATACAAACCGTGGAAAACG

B. nigra LR1-1 (5557) GGCAAAGAGGGCACTTAGAAGTCGGCAAGAAAGTGAGTAGACATGGATA-CTTGAACAGACTGGCGAGCATTCAACAAGAAATACAAACCGTGGAAAACG

B. nigra LR1-2 (5560) GGCAAAGAGGGCACTTAGAAGTCGGCAAGAAAGTGAGTAGACATGGATATCGCGAACAGACTGGCGAGCATTCAACAAGAAATACAAACCGTGGAAAACG

B. carinata LR1-1 (5556) GGCAAAGAGGGCACTTAGAAGTCGGCAAGAAAGTGAGTAGACATGGATATCGCGAACAGACTGGCGAGCATTCAACAAGAAATACAAACCGTGGAAAACG

B. carinata LR1-2 (5556) GGCAAAGAGGGCACTTAGAAGTCGGCAAGAAAGTGAGTAGACATGGATATCGCGAACAGACTGGCGAGCATTCAACAAGAAATACAAACCGTGGAAAACG

B_rapa BnLRh1b (853) GGCAAAGAGGGCACTTAGAAGTCGGCAAGAAAGTGAGTAGACATGGATATCGCGAACAGACTGGCGAGCATTCAACAAGAAATACAAACCGTGGAAAACG

B_juncea BnLRh1b (853) GGCAAAGAGGGCACTTAGAAGTCGGCAAGAAAGTGAGTAGACATGGATATCGCGAACAGACTGGCGAGCATTCAACAAGAAATACAAACCGTGGAAAACG

B_napus BnLRh1b (853) GGCAAAGAGGGCACTTAGAAGTCGGCAAGAAAGTGAGTAGACATGGATATCGCGAACAGACTGGCGAGCATTCAACAAGAAATACAAACCGTGGAAAACG

B_oleracea BnLRh1b (853) GGCAAAGAGGGCACTTAGAAGTCGGCAAGAAAGTGAGTAGACATGGATATCGCGAACAGACTGGCGAGCATTCAACAAGAAATACAAACCGTGGAAAACG

6801 6900

Raphanus LR1-1 (6507) AAAAGCTCCAATGTGAGCAAATGCTTGGTCTGTTCTGGGAGCATCCGCCTGCTCTCGATCCGGAGGTCGTGGGCAGAAGGATGCAACTTTTACGGGACCG

Raphanus LR1-2 (6507) AAAAGCTCCAATGTGAGCAAATGCTTGGTCTGTTCTGGGAGCATCCGCCTGCTCTCGATCCGGAGGTCGTGGGCAGAAGGATGCAACTTTTACGGGACCG

Sinapis LR1-1 (6785) AAAAGCTCCAATGTGAGCAAATGCTTGGTCTGTTCTGGGAGCATCCGCCTGCTCTCGATCCGGAGGTCGTGGGCAGAAGGATGCAACTTTTACGGGACCG

Sinapis LR1-2 (6785) AAAAGCTCCAATGTGAGCAAATGCTTGGTCTGTTCTGGGAGCATCCGCCTGCTCTCGATCCGGAGGTCGTGGGCAGAAGGATGCAACTTTTACGGGACCG

B. nigra LR1-1 (5656) AAAAGCTCCAATGTGAGCAAATGCTTGGTCTGTTCTGGGAGCATCCGCCTGCTCTCGATCCGGAGGTCGTGGGCAGAAGGATGCAACTTTTACGGGACCG

B. nigra LR1-2 (5660) AAAAGCTCCAATGTGAGCAAATGCTTGGTCTGTTCTGGGAGCATCCGCCTGCTCTCGATCCGGAGGTCGTGGGCAGAAGGATGCAACTTTTACGGGACCG

B. carinata LR1-1 (5656) AAAAGCTCCAATGTGAGCAAATGCTTGGTCTGTTCTGGGAGCATCCGCCTGCTCTCGATCCGGAGGTCGTGGGCAGAAGGATGCAACTTTTACGGGACCG

B. carinata LR1-2 (5656) AAAAGCTCCAATGTGAGCAAATGCTTGGTCTGTTCTGGGAGCATCCGCCTGCTCTCGATCCGGAGGTCGTGGGCAGAAGGATGCAACTTTTACGGGACCG

B_rapa BnLRh1b (953) AAAAGCTCCAATGTGAGCAAATGCTTGGTCTGTTCTGGGAGCATCCGCCTGCTCTCGATCCGGAGGTCGTGGGCAGAAGGATGCAACTTTTACGGGACCG

B_juncea BnLRh1b (953) AAAAGCTCCAATGTGAGCAAATGCTTGGTCTGTTCTGGGAGCATCCGCCTGCTCTCGATCCGGAGGTCGTGGGCAGAAGGATGCAACTTTTACGGGACCG

B_napus BnLRh1b (953) AAAAGCTCCAATGTGAGCAAATGCTTGGTCTGTTCTGGGAGCATCCGCCTGCTCTCGATCCGGAGGTCGTGGGCAGAAGGATGCAACTTTTACGGGACCG

B_oleracea BnLRh1b (953) AAAAGCTCCAATGTGAGCAAATGCTTGGTCTGTTCTGGGAGCATCCGCCTGCTCTCGATCCGGAGGTCGTGGGCAGAAGGATGCAACTTTTACGGGACCG

6901 7000

Raphanus LR1-1 (6607) CATTCGCGGTCTGAAACACAGGATTTCTTTTCTCCTGAAGGAGCAGGAAGGCCTAATAATACAGGCTGTCACCCACGGTCGCCGGGGAGACTAGAATAGA

Raphanus LR1-2 (6607) CATTCGCGGTCTGAAACACAGGATTTCTTTTCTCCTGAAGGAGCAGGAAGGCCTAATAATACAGGCTGTCACCCACGGTCGCCGGGGAGACTAGAATAGA

Sinapis LR1-1 (6885) CATTCGCGGTCTGAAACACAGGATTTCTTTTCTCCTGAAGGAGCAGGAAGGCCTAATAATACAGGCTGTCACCCACGGTCGCCGGGGAGACTAGAATAGA

Sinapis LR1-2 (6885) CATTCGCGGTCTGAAACACAGGATTTCTTTTCTCCTGAAGGAGCAGGAAGGCCTAATAATACAGGCTGTCACCCACGGTCGCCGGGGAGACTAGAATAGA

B. nigra LR1-1 (5756) CATTCGCGGTCTGAAACACAGGATTTCTTTTCTCCTGAAGGAGCAGGAAGGCCTAATAATACAGGCTGTCACCCACGGTCGCCGGGGAGACTAGAATAGA

B. nigra LR1-2 (5760) CATTCGCGGTCTGAAACACAGGATTTCTTTTCTCCTGAAGGAGCAGGAAGGCCTAATAATACAGGCTGTCACCCACGGTCGCCGGGGAGACTAGAATAGA

B. carinata LR1-1 (5756) CATTCGCGGTCTGAAACACAGGATTTCTTTTCTCCTGAAGGAGCAGGAAGGCCTAATAATACAGGCTGTCACCCACGGTCGCCGGGGAGACTAGAATAGA

B. carinata LR1-2 (5756) CATTCGCGGTCTGAAACACAGGATTTCTTTTCTCCTGAAGGAGCAGGAAGGCCTAATAATACAGGCTGTCACCCACGGTCGCCGGGGAGACTAGAATAGA

B_rapa BnLRh1b (1053) CATTCGCGGTCTGAAACACAGGATTTCTTTTCTCCTGAAGGAGCAGGAAGGCCTAATAATACAGGCTGTCACCCACGGTCGCCGGGGAGACTAGAATAGA

B_juncea BnLRh1b (1053) CATTCGCGGTCTGAAACACAGGATTTCTTTTCTCCTGAAGGAGCAGGAAGGCCTAATAATACAGGCTGTCACCCACGGTCGCCGGGGAGACTAGAATAGA

B_napus BnLRh1b (1053) CATTCGCGGTCTGAAACACAGGATTTCTTTTCTCCTGAAGGAGCAGGAAGGCCTAATAATACAGGCTGTCACCCACGGTCGCCGGGGAGACTAGAATAGA

B_oleracea BnLRh1b (1053) CATTCGCGGTCTGAAACACAGGATTTCTTTTCTCCTGAAGGAGCAGGAAGGCCTAATAATACAGGCTGTCACCCACGGTCGCCGGGGAGACTAGAATAGA

7001 7100

Raphanus LR1-1 (6707) AGAGTCCGCCAACTTCCTATATCGCTAAAATGGAAAATAAGGAGTCCGTCGACCCAAAGTCTTGT------ATGC-------------------------

Raphanus LR1-2 (6707) AGAGTCCGCCAACTTCCTATATCGCTAAAATGGAAAATAAGGAGTCCGTCGACCCAAAGTCTTGT------ATGC-------------------------

Sinapis LR1-1 (6985) AGAGTCCGTCGACTCTTTCTTTCGATAAGATTGAAA-TAAGGAGTCCGTCGACCCAAAGTAATGTGTTTTAATGCATGGCTTTCTTTGTTATCTTTCATG

Sinapis LR1-2 (6985) AGAGTCCGTCGACTCTTTCTTTCGATAAGATTGAAA-TAAGGAGTCCGTCGACCCAAAGTAATGTGTTTTAATGCATGGCTTTCTTTGTTATCTTTCATG

B. nigra LR1-1 (5856) AGAGTCCGTCGACTCTTTCTTTCGATAAGATTGAAA-TAAGGAGTCCGTCGACCCAAAGTAATGTGTTTTAATGCATGGCTTTCTTTGTTATCTTTCATG

B. nigra LR1-2 (5860) AGAGTCCGTCGACTCTTTCTTTCGATAAGATTGAAA-TAAGGAGTCCGTCGACCCAAAGTAATGTGTTTTAATGCATGGCTTTCTTTGTTATCTTTCATG

B. carinata LR1-1 (5856) AGAGTCCGTCGACTCTTTCTTTCGATAAGATTGAAA-TAAGGAGTCCGTCGACCCAAAGTAATGTGTTTTAATGCATGGCTTTCTTTGTTATCTTTCATG

B. carinata LR1-2 (5856) AGAGTCCGTCGACTCTTTCTTTCGATAAGATTGAAA-TAAGGAGTCCGTCGACCCAAAGTAATGTGTTTTAATGCATGGCTTTCTTTGTTATCTTTCATG

B_rapa BnLRh1b (1153) AGAGTCCGCCAACTTCCTATATCGCTAAAATGGAAAATAAGGAGTCCGTCGACCCAAAGTCTTGT------ATGC-------------------------

B_juncea BnLRh1b (1153) AGAGTCCGCCAACTTCCTATATCGCTAAAATGGAAAATAAGGAGTCCGTCGACCCAAAGTCTTGT------ATGC-------------------------

B_napus BnLRh1b (1153) AGAGTCCGCCAACTTCCTATATCGCTAAAATGGAAAATAAGGAGTCCGTCGACCCAAAGTCTTGT------ATGC-------------------------

B_oleracea BnLRh1b (1153) AGAGTCCGCCAACTTCCTATATCGCTAAAATGGAAAATAAGGAGTCCGTCGACCCAAAGTCTTGT------ATGC-------------------------

7101 7200

Raphanus LR1-1 (6776) TTGCTCTATGTCTTTGGTTTATGTACTATGTTCTTAGTTTCCTTTTTAATGGTGTGTGGCTGGTCTACGGTGTGTGTAGGCTTCCTATTTTATGTATGCT

Raphanus LR1-2 (6776) TTGCTCTATGTCTTTGGTTTATGTACTATGTTCTTAGTTTCCTTTTTAATGGTGTGTGGCTGGTCTACGGTGTGTGTAGGCTTCCTATTTTATGTATGCT

Sinapis LR1-1 (7084) TTGCTCTATGTCTTTGGTTTATGTACTATGTTCTTAGTTTCCTTTTTAATGGTGTGTGGCTGGTCTACGGTGTGTGTAGGCTTCCTATTTTATGTATGCT

Sinapis LR1-2 (7084) TTGCTCTATGTCTTTGGTTTATGTACTATGTTCTTAGTTTCCTTTTTAATGGTGTGTGGCTGGTCTACGGTGTGTGTAGGCTTCCTATTTTATGTATGCT

B. nigra LR1-1 (5955) TTGCTCTATGTCTTTGGTTTATGTACTATGTTCTTAGTTTCCTTTTTAATGGTGTGTGGCTGGTCTACGGTGTGTGTAGGCTTCCTATTTTATGTATGCT

B. nigra LR1-2 (5959) TTGCTCTATGTCTTTGGTTTATGTACTATGTTCTTAGTTTCCTTTTTAATGGTGTGTGGCTGGTCTACGGTGTGTGTAGGCTTCCTATTTTATGTATGCT

B. carinata LR1-1 (5955) TTGCTCTATGTCTTTGGTTTATGTACTATGTTCTTAGTTTCCTTTTTAATGGTGTGTGGCTGGTCTACGGTGTGTGTAGGCTTCCTATTTTATGTATGCT

B. carinata LR1-2 (5955) TTGCTCTATGTCTTTGGTTTATGTACTATGTTCTTAGTTTCCTTTTTAATGGTGTGTGGCTGGTCTACGGTGTGTGTAGGCTTCCTATTTTATGTATGCT

B_rapa BnLRh1b (1222) TTGCTCTATGTCTTTGGTTTATGTACTATGTTCTTAGTTTCCTTTTTAATGGTGTGTGGCTGGTCTACGGTGTGTGTAGGCTTCCTATTTTATGTATGCT

B_juncea BnLRh1b (1222) TTGCTCTATGTCTTTGGTTTATGTACTATGTTCTTAGTTTCCTTTTTAATGGTGTGTGGCTGGTCTACGGTGTGTGTAGGCTTCCTATTTTATGTATGCT

B_napus BnLRh1b (1222) TTGCTCTATGTCTTTGGTTTATGTACTATGTTCTTAGTTTCCTTTTTAATGGTGTGTGGCTGGTCTACGGTGTGTGTAGGCTTCCTATTTTATGTATGCT

B_oleracea BnLRh1b (1222) TTGCTCTATGTCTTTGGTTTATGTACTATGTTCTTAGTTTCCTTTTTAATGGTGTGTGGCTGGTCTACGGTGTGTGTAGGCTTCCTATTTTATGTATGCT

7201 7300

Raphanus LR1-1 (6876) TGTAATGCTTCTGCTTTGTCAAATATTCCTTTGAATATCCGGTCTTCATCTTCCTTAGATTAGATGCTACTTCCTTCGTCTAACGCACTGCCCCACAGAT

Raphanus LR1-2 (6876) TGTAATGCTTCTGCTTTGTCAAATATTCCTTTGAATATCCGGTCTTCATCTTCCTTAGATTAGATGCTACTTCCTTCGTCTAACGCACTGCCCCACAGAT

Sinapis LR1-1 (7184) TGTAATGCTTCTGCTTTGTCAAATATTCCTTTGAATATCCGGTCTTCATCTTCCTTAGATTAGATGCTACTTCCTTCGTCTAACGCACTGCCCCACAGAT

Sinapis LR1-2 (7184) TGTAATGCTTCTGCTTTGTCAAATATTCCTTTGAATATCCGGTCTTCATCTTCCTTAGATTAGATGCTACTTCCTTCGTCTAACGCACTGCCCCACAGAT

B. nigra LR1-1 (6055) TGTAATGCTTCTGCTTTGTCAAATATTCCTTTGAATATCCGGTCTTCATCTTCCTTAGATTAGATGCTACTTCCTTCGTCTAACGCACTGCCCCACAGAT

B. nigra LR1-2 (6059) TGTAATGCTTCTGCTTTGTCAAATATTCCTTTGAATATCCGGTCTTCATCTTCCTTAGATTAGATGCTACTTCCTTCGTCTAACGCACTGCCCCACAGAT

B. carinata LR1-1 (6055) TGTAATGCTTCTGCTTTGTCAAATATTCCTTTGAATATCCGGTCTTCATCTTCCTTAGATTAGATGCTACTTCCTTCGTCTAACGCACTGCCCCACAGAT

B. carinata LR1-2 (6055) TGTAATGCTTCTGCTTTGTCAAATATTCCTTTGAATATCCGGTCTTCATCTTCCTTAGATTAGATGCTACTTCCTTCGTCTAACGCACTGCCCCACAGAT

B_rapa BnLRh1b (1322) TGTAATGCTTCTGCTTTGTCAAATATTCCTTTGAATATCCGGTCTTCATCTTCCTTAGATTAGATGCTACTTCCTTCGTCTAACGCACTGCCCCACAGAT

B_juncea BnLRh1b (1322) TGTAATGCTTCTGCTTTGTCAAATATTCCTTTGAATATCCGGTCTTCATCTTCCTTAGATTAGATGCTACTTCCTTCGTCTAACGCACTGCCCCACAGAT

B_napus BnLRh1b (1322) TGTAATGCTTCTGCTTTGTCAAATATTCCTTTGAATATCCGGTCTTCATCTTCCTTAGATTAGATGCTACTTCCTTCGTCTAACGCACTGCCCCACAGAT

B_oleracea BnLRh1b (1322) TGTAATGCTTCTGCTTTGTCAAATATTCCTTTGAATATCCGGTCTTCATCTTCCTTAGATTAGATGCTACTTCCTTCGTCTAACGCACTGCCCCACAGAT

7301 7400

Raphanus LR1-1 (6976) AATCAAAGTCTGTAATAGCGGACGATTCTATCAAACCCTAAAGTAGAAGAAAAAGTAGAAGCTACGAAACCATAAAGCTTCCCTCCTGTTTGAAACAGAA

Raphanus LR1-2 (6976) AATCAAAGTCTGTAATAGCGGACGATTCTATCAAACCCTAAAGTAGAAGAAAAAGTAGAAGCTACGAAACCATAAAGCTTCCCTCCTGTTTGAAACAGAA

Sinapis LR1-1 (7284) AATCAAAGTCTGTAATAGCGGACGATTCTATCAAACCCTAAAGTAGAAGAAAAAGTAGAAGCTACGAAACCATAAAGCTTCCCTCCTGTTTGAAACAGAA

Sinapis LR1-2 (7284) AATCAAAGTCTGTAATAGCGGACGATTCTATCAAACCCTAAAGTAGAAGAAAAAGTAGAAGCTACGAAACCATAAAGCTTCCCTCCTGTTTGAAACAGAA

B. nigra LR1-1 (6155) AATCAAAGTCTGTAATAGCGGACGATTCTATCAAACCCTAAAGTAGAAGAAAAAGTAGAAGCTACGAAACCATAAAGCTTCCCTCCTGTTTGAAACAGAA

B. nigra LR1-2 (6159) AATCAAAGTCTGTAATAGCGGACGATTCTATCAAACCCTAAAGTAGAAGAAAAAGTAGAAGCTACGAAACCATAAAGCTTCCCTCCTGTTTGAAACAGAA

B. carinata LR1-1 (6155) AATCAAAGTCTGTAATAGCGGACGATTCTATCAAACCCTAAAGTAGAAGAAAAAGTAGAAGCTACGAAACCATAAAGCTTCCCTCCTGTTTGAAACAGAA

B. carinata LR1-2 (6155) AATCAAAGTCTGTAATAGCGGACGATTCTATCAAACCCTAAAGTAGAAGAAAAAGTAGAAGCTACGAAACCATAAAGCTTCCCTCCTGTTTGAAACAGAA

B_rapa BnLRh1b (1422) AATCAAAGTCTGTAATAGCGGACGATTCTATCAAACCCTAAAGTAGAAGAAAAAGTAGAAGCTACGAAACCATAAAGCTTCCCTCCTGTTTGAAACAGAA

B_juncea BnLRh1b (1422) AATCAAAGTCTGTAATAGCGGACGATTCTATCAAACCCTAAAGTAGAAGAAAAAGTAGAAGCTACGAAACCATAAAGCTTCCCTCCTGTTTGAAACAGAA

B_napus BnLRh1b (1422) AATCAAAGTCTGTAATAGCGGACGATTCTATCAAACCCTAAAGTAGAAGAAAAAGTAGAAGCTACGAAACCATAAAGCTTCCCTCCTGTTTGAAACAGAA

B_oleracea BnLRh1b (1422) AATCAAAGTCTGTAATAGCGGACGATTCTATCAAACCCTAAAGTAGAAGAAAAAGTAGAAGCTACGAAACCATAAAGCTTCCCTCCTGTTTGAAACAGAA

7401 7500

Raphanus LR1-1 (7076) AGCATTGATATCATTGGACACTAAAGGGTCAAACTTTGCTTTGTGCTGTTCACATAGTCGACTGGGAAACGGAAAATCTCATTAATCTTAGTATTACAGA

Raphanus LR1-2 (7076) AGCATTGATATCATTGGACACTAAAGGGTCAAACTTTGCTTTGTGCTGTTCACATAGTCGACTGGGAAACGGAAAATCTCATTAATCTTAGTATTACAGA

Sinapis LR1-1 (7384) AGCATTGATATCATTGGACACTAAAGGGTCAAACTTTGCTTTGTGCTGTTCACATAGTCGACTGGGAAACGGAAAATCTCATTAATCTTAGTATTACAGA

Sinapis LR1-2 (7384) AGCATTGATATCATTGGACACTAAAGGGTCAAACTTTGCTTTGTGCTGTTCACATAGTCGACTGGGAAACGGAAAATCTCATTAATCTTAGTATTACAGA

B. nigra LR1-1 (6255) AGCATTGATATCATTGGACACTAAAGGGTCAAACTTTGCTTTGTGCTGTTCACATAGTCGACTGGGAAACGGAAAATCTCATTAATCTTAGTATTACAGA

B. nigra LR1-2 (6259) AGCATTGATATCATTGGACACTAAAGGGTCAAACTTTGCTTTGTGCTGTTCACATAGTCGACTGGGAAACGGAAAATCTCATTAATCTTAGTATTACAGA

B. carinata LR1-1 (6255) AGCATTGATATCATTGGACACTAAAGGGTCAAACTTTGCTTTGTGCTGTTCACATAGTCGACTGGGAAACGGAAAATCTCATTAATCTTAGTATTACAGA

B. carinata LR1-2 (6255) AGCATTGATATCATTGGACACTAAAGGGTCAAACTTTGCTTTGTGCTGTTCACATAGTCGACTGGGAAACGGAAAATCTCATTAATCTTAGTATTACAGA

B_rapa BnLRh1b (1522) AGCATTGATATCATTGGACACTAAAGGGTCAAACTTTGCTTTGTGCTGTTCACATAGTCGACTGGGAAACGGAAAATCTCATTAATCTTAGTATTACAGA

B_juncea BnLRh1b (1522) AGCATTGATATCATTGGACACTAAAGGGTCAAACTTTGCTTTGTGCTGTTCACATAGTCGACTGGGAAACGGAAAATCTCATTAATCTTAGTATTACAGA

B_napus BnLRh1b (1522) AGCATTGATATCATTGGACACTAAAGGGTCAAACTTTGCTTTGTGCTGTTCACATAGTCGACTGGGAAACGGAAAATCTCATTAATCTTAGTATTACAGA

B_oleracea BnLRh1b (1522) AGCATTGATATCATTGGACACTAAAGGGTCAAACTTTGCTTTGTGCTGTTCACATAGTCGACTGGGAAACGGAAAATCTCATTAATCTTAGTATTACAGA

7501 7600

Raphanus LR1-1 (7176) CTTTTTACGAAGCGAGAGGAAAAGACGGCAAAGTCTTAACTAAACC-------CTGAA----AGCCTAAAAAAA---CGAACTTCCTTCAATGCCTTCTC

Raphanus LR1-2 (7176) CTTTTTACGAAGCGAGAGGAAAAGACGGCAAAGTCTTAACTAAACC-------CTGAA----AGCCTAAAAAAA---CGAACTTCCTTCAATGCCTTCTC

Sinapis LR1-1 (7484) CTTTTTACGAAGCGAGAGGAAAAGACGGCAAAGTCTTAACTAAACTATTCCGACTGAATATGAGCCTAAAAAAAATGCGAACTTCCTTCAATGCCTTCTC

Sinapis LR1-2 (7484) CTTTTTACGAAGCGAGAGGAAAAGACGGCAAAGTCTTAACTAAACTATTCCGACTGAATATGAGCCTAAAAAAAATGCGAACTTCCTTCAATGCCTTCTC

B. nigra LR1-1 (6355) CTTTTTACGAAGCGAGAGGAAAAGACGGCAAAGTCTTAACTAAACTATTCCGACTGAATATGAGCCTAAAAAAAATGCGAACTTCCTTCAATGCCTTCTC

B. nigra LR1-2 (6359) CTTTTTACGAAGCGAGAGGAAAAGACGGCAAAGTCTTAACTAAACTATTCCGACTGAATATGAGCCTAAAAAAAATGCGAACTTCCTTCAATGCCTTCTC

B. carinata LR1-1 (6355) CTTTTTACGAAGCGAGAGGAAAAGACGGCAAAGTCTTAACTAAACTATTCCGACTGAATATGAGCCTAAAAAAAATGCGAACTTCCTTCAATGCCTTCTC

B. carinata LR1-2 (6355) CTTTTTACGAAGCGAGAGGAAAAGACGGCAAAGTCTTAACTAAACTATTCCGACTGAATATGAGCCTAAAAAAAATGCGAACTTCCTTCAATGCCTTCTC

B_rapa BnLRh1b (1622) CTTTTTACGAAGCGAGAGGAAAAGACGGCAAAGTCTTAACTAAACC-------CTGAA----AGCCTAAAAAAA---CGAACTTCCTTCAATGCCTTCTC

B_juncea BnLRh1b (1622) CTTTTTACGAAGCGAGAGGAAAAGACGGCAAAGTCTTAACTAAACC-------CTGAA----AGCCTAAAAAAA---CGAACTTCCTTCAATGCCTTCTC

B_napus BnLRh1b (1622) CTTTTTACGAAGCGAGAGGAAAAGACGGCAAAGTCTTAACTAAACC-------CTGAA----AGCCTAAAAAAA---CGAACTTCCTTCAATGCCTTCTC

B_oleracea BnLRh1b (1622) CTTTTTACGAAGCGAGAGGAAAAGACGGCAAAGTCTTAACTAAACC-------CTGAA----AGCCTAAAAAAA---CGAACTTCCTTCAATGCCTTCTC

7601 7700

Raphanus LR1-1 (7262) ATTAGTATCTGCTGTGTCGCTAAGCATTCTTTCCATCCGCTAATGGACCTCTTGATGCTCGACC-AGCCATCAACCGCATCTGACTTTGATCCATAAGTA

Raphanus LR1-2 (7262) ATTAGTATCTGCTGTGTCGCTAAGCATTCTTTCCATCCGCTAATGGACCTCTTGATGCTCGACC-AGCCATCAACCGCATCTGACTTTGATCCATAAGTA

Sinapis LR1-1 (7584) ATTAGTATCTGCTGTGTCGCTAAGCATTCTTTCCATCCGCTAATGGACCT----AT-CTCGACGGAATCGGCGTGCAGGAGCGTACTGCAGAACTATGAC

Sinapis LR1-2 (7584) ATTAGTATCTGCTGTGTCGCTAAGCATTCTTTCCATCCGCTAATGGACCT----AT-CTCGACGGAATCGGCGTGCAGGAGCGTACTGCAGAACTATGAC

B. nigra LR1-1 (6455) ATTAGTATCTGCTGTGTCGCTAAGCATTCTTTCCATCCGCTAATGGACCT----ATGCTCGACGGAATCGGCGTGCAGGAGCGTACTGCAGAACTATGAC

B. nigra LR1-2 (6459) ATTAGTATCTGCTGTGTCGCTAAGCATTCTTTCCATCCGCTAATGGACCT----ATGCTCGACGGAATCGGCGTGCAGGAGCGTACTGCAGAACTATGAC

B. carinata LR1-1 (6455) ATTAGTATCTGCTGTGTCGCTAAGCATTCTTTCCATCCGCTAATGGACCT----ATGCTCGACGGAATCGGCGTGCAGGAGCGTACTGCAGAACTATGAC

B. carinata LR1-2 (6455) ATTAGTATCTGCTGTGTCGCTAAGCATTCTTTCCATCCGCTAATGGACCT----ATGCTCGACGGAATCGGCGTGCAGGAGCGTACTGCAGAACTATGAC

B_rapa BnLRh1b (1708) ATTAGTATCTGCTGTGTCGCTAAGCATTCTTTCCATCCGCTAATGGACCT----ATGCTCGAC-------------------------------------

B_juncea BnLRh1b (1708) ATTAGTATCTGCTGTGTCGCTAAGCATTCTTTCCATCCGCTAATGGACCT----ATGCTCGAC-------------------------------------

B_napus BnLRh1b (1708) ATTAGTATCTGCTGTGTCGCTAAGCATTCTTTCCATCCGCTAATGGACCT----ATGCTCGAC-------------------------------------

B_oleracea BnLRh1b (1708) ATTAGTATCTGCTGTGTCGCTAAGCATTCTTTCCATCCGCTAATGGACCT----ATGCTCGAC-------------------------------------

7701 7800

Raphanus LR1-1 (7361) GATTCAATAGGAGGGTACCATCTCGCTTCTCTTTCCTTGTACGTTCCAGCTCGCTTCGTCTGCTTCAGAGTGGGAAAAGAAGAAGGTAGAAAACCGAGGT

Raphanus LR1-2 (7361) GATTCAATAGGAGGGTACCATCTCGCTTCTCTTTCCTTGTACGTTCCAGCTCGCTTCGTCTGCTTCAGAGTGGGAAAAGAAGAAGGTAGAAAACCGAGGT

Sinapis LR1-1 (7679) CCATACAGTGGAAGCTCTGGTCCC----------------------------------------------------------------------------

Sinapis LR1-2 (7679) CCATACAGTGGAAGCTCTGGTCCC----------------------------------------------------------------------------

B. nigra LR1-1 (6551) CCATACAGTGGAAGCTCTGGTCCC----------------------------------------------------------------------------

B. nigra LR1-2 (6555) CCATACAGTGGAAGCTCTGGTCCC----------------------------------------------------------------------------

B. carinata LR1-1 (6551) CCATACAGTGGAAGCTCTGGTCCCGCTTAT----------------------------------------------------------------------

B. carinata LR1-2 (6551) CCATACAGTGGAAGCTCTGGTCCCACTAAT----------------------------------------------------------------------

B_rapa BnLRh1b (1767) ----------------------------------------------------------------------------------------------------

B_juncea BnLRh1b (1767) ----------------------------------------------------------------------------------------------------

B_napus BnLRh1b (1767) ----------------------------------------------------------------------------------------------------

B_oleracea BnLRh1b (1767) ----------------------------------------------------------------------------------------------------

7801 7900

Raphanus LR1-1 (7461) GAGCAAAAGGCTCTTTCTTCTTAATACGCTTAGATAGTTCATTGACTTACGCTTAGATTAGATAGTTCATTGACTACGAGACTGGAATCTGATGCTTCTT

Raphanus LR1-2 (7461) GAGCAAAAGGCTCTTTCTTCTTAATACGCTTAGATAGTTCATTGACTTACGCTTAGATTAGATAGTTCATTGACTACGAGACTGGAATCTGATGCTTCTT

Sinapis LR1-1 (7703) ----------------------------------------------------------------------------------------------------

Sinapis LR1-2 (7703) ----------------------------------------------------------------------------------------------------

B. nigra LR1-1 (6575) ----------------------------------------------------------------------------------------------------

B. nigra LR1-2 (6579) ----------------------------------------------------------------------------------------------------

B. carinata LR1-1 (6581) ----------------------------------------------------------------------------------------------------

B. carinata LR1-2 (6581) ----------------------------------------------------------------------------------------------------

B_rapa BnLRh1b (1767) ----------------------------------------------------------------------------------------------------

B_juncea BnLRh1b (1767) ----------------------------------------------------------------------------------------------------

B_napus BnLRh1b (1767) ----------------------------------------------------------------------------------------------------

B_oleracea BnLRh1b (1767) ----------------------------------------------------------------------------------------------------

7901 8000

Raphanus LR1-1 (7561) TATGGTCCGATCCTAAAAGCAAGAGAAGTTTAGGTAGGAGTACGTCGCTTCTTTCTTTTTCATATCTGCTGTCCCAGCTGAGTTCCGCTATCAACTAATT

Raphanus LR1-2 (7561) TATGGTCCGATCCTAAAAGCAAGAGAAGTTTAGGTAGGAGTACGTCGCTTCTTTCTTTTTCATATCTGCTGTCCCAGCTGAGTTCCGCTATCAACTAATT

Sinapis LR1-1 (7703) ----------------------------------------------------------------------------------------------------

Sinapis LR1-2 (7703) ----------------------------------------------------------------------------------------------------

B. nigra LR1-1 (6575) ----------------------------------------------------------------------------------------------------

B. nigra LR1-2 (6579) ----------------------------------------------------------------------------------------------------

B. carinata LR1-1 (6581) ----------------------------------------------------------------------------------------------------

B. carinata LR1-2 (6581) ----------------------------------------------------------------------------------------------------

B_rapa BnLRh1b (1767) ----------------------------------------------------------------------------------------------------

B_juncea BnLRh1b (1767) ----------------------------------------------------------------------------------------------------

B_napus BnLRh1b (1767) ----------------------------------------------------------------------------------------------------

B_oleracea BnLRh1b (1767) ----------------------------------------------------------------------------------------------------

8001 8100

Raphanus LR1-1 (7661) ATAGTCGCATAGCAAGCGATGTAATAAATCACTGAGATCTTTTGAATTTCAAGTAAATCATAGATAAAGCATTAAGTAGGAGCGGTAGCTTTCTGCTTCG

Raphanus LR1-2 (7661) ATAGTCGCATAGCAAGCGATGTAATAAATCACTGAGATCTTTTGAATTTCAAGTAAATCATAGATAAAGCATTAAGTAGGAGCGGTAGCTTTCTGCTTCG

Sinapis LR1-1 (7703) ----------------------------------------------------------------------------------------------------

Sinapis LR1-2 (7703) ----------------------------------------------------------------------------------------------------

B. nigra LR1-1 (6575) ----------------------------------------------------------------------------------------------------

B. nigra LR1-2 (6579) ----------------------------------------------------------------------------------------------------

B. carinata LR1-1 (6581) ----------------------------------------------------------------------------------------------------

B. carinata LR1-2 (6581) ----------------------------------------------------------------------------------------------------

B_rapa BnLRh1b (1767) ----------------------------------------------------------------------------------------------------

B_juncea BnLRh1b (1767) ----------------------------------------------------------------------------------------------------

B_napus BnLRh1b (1767) ----------------------------------------------------------------------------------------------------

B_oleracea BnLRh1b (1767) ----------------------------------------------------------------------------------------------------

8101 8200

Raphanus LR1-1 (7761) GTTGGCGCGTTGCAGTAATGAAGAAAAGAATGAGATTGGTTCGGTCTTAAGTCTTTGGGTGAATCAATTTAGGTATCGAAGTTTTAGTTATTGCCATCCC

Raphanus LR1-2 (7761) GTTGGCGCGTTGCAGTAATGAAGAAAAGAATGAGATTGGTTCGGTCTTAAGTCTTTGGGTGAATCAATTTAGGTATCGAAGTTTTAGTTATTGCCATCCC

Sinapis LR1-1 (7703) ----------------------------------------------------------------------------------------------------

Sinapis LR1-2 (7703) ----------------------------------------------------------------------------------------------------

B. nigra LR1-1 (6575) ----------------------------------------------------------------------------------------------------

B. nigra LR1-2 (6579) ----------------------------------------------------------------------------------------------------

B. carinata LR1-1 (6581) ----------------------------------------------------------------------------------------------------

B. carinata LR1-2 (6581) ----------------------------------------------------------------------------------------------------

B_rapa BnLRh1b (1767) ----------------------------------------------------------------------------------------------------

B_juncea BnLRh1b (1767) ----------------------------------------------------------------------------------------------------

B_napus BnLRh1b (1767) ----------------------------------------------------------------------------------------------------

B_oleracea BnLRh1b (1767) ----------------------------------------------------------------------------------------------------

8201 8300

Raphanus LR1-1 (7861) TTGCTTGGCAGCAGTGGGCTTGGTAGTAGCATAGGTGGGTCCTCGGGCAGTTTTTTCAGGGCGTAGGGATCACTGTCTCACTGTGGTACCCGAAAACTTT

Raphanus LR1-2 (7861) TTGCTTGGCAGCAGTGGGCTTGGTAGTAGCATAGGTGGGTCCTCGGGCAGTTTTTTCAGGGCGTAGGGATCACTGTCTCACTGTGGTACCCGAAAACTTT

Sinapis LR1-1 (7703) ----------------------------------------------------------------------------------------------------

Sinapis LR1-2 (7703) ----------------------------------------------------------------------------------------------------

B. nigra LR1-1 (6575) ----------------------------------------------------------------------------------------------------

B. nigra LR1-2 (6579) ----------------------------------------------------------------------------------------------------

B. carinata LR1-1 (6581) ----------------------------------------------------------------------------------------------------

B. carinata LR1-2 (6581) ----------------------------------------------------------------------------------------------------

B_rapa BnLRh1b (1767) ----------------------------------------------------------------------------------------------------

B_juncea BnLRh1b (1767) ----------------------------------------------------------------------------------------------------

B_napus BnLRh1b (1767) ----------------------------------------------------------------------------------------------------

B_oleracea BnLRh1b (1767) ----------------------------------------------------------------------------------------------------

8301 8400

Raphanus LR1-1 (7961) CTATGCCCACATTTCATAGTTTGAAAGCGCTCTTTAGTGACTTTGTTTGAAAGCGCTCTTTAGTGACTTTCATGTCTTCTGCTACTTTGACTTTAGGAAG

Raphanus LR1-2 (7961) CTATGCCCACATTTCATAGTTTGAAAGCGCTCTTTAGTGACTTTGTTTGAAAGCGCTCTTTAGTGACTTTCATGTCTTCTGCTACTTTGACTTTAGGAAG

Sinapis LR1-1 (7703) ----------------------------------------------------------------------------------------------------

Sinapis LR1-2 (7703) ----------------------------------------------------------------------------------------------------

B. nigra LR1-1 (6575) ----------------------------------------------------------------------------------------------------

B. nigra LR1-2 (6579) ----------------------------------------------------------------------------------------------------

B. carinata LR1-1 (6581) ----------------------------------------------------------------------------------------------------

B. carinata LR1-2 (6581) ----------------------------------------------------------------------------------------------------

B_rapa BnLRh1b (1767) ----------------------------------------------------------------------------------------------------

B_juncea BnLRh1b (1767) ----------------------------------------------------------------------------------------------------

B_napus BnLRh1b (1767) ----------------------------------------------------------------------------------------------------

B_oleracea BnLRh1b (1767) ----------------------------------------------------------------------------------------------------

8401 8500

Raphanus LR1-1 (8061) ATTCAGACAGTCTTTTATGCCCTCTTTTAGGTTTGTTTTTTCCTTCCCCCAATTCTAGGATGCGTAGTAGCTCTAGTAAGTCCGTAGCTGGATCTGGCAG

Raphanus LR1-2 (8061) ATTCAGACAGTCTTTTATGCCCTCTTTTAGGTTTGTTTTTTCCTTCCCCCAATTCTAGGATGCGTAGTAGCTCTAGTAAGTCCGTAGCTGGATCTGGCAG

Sinapis LR1-1 (7703) ----------------------------------------------------------------------------------------------------

Sinapis LR1-2 (7703) ----------------------------------------------------------------------------------------------------

B. nigra LR1-1 (6575) ----------------------------------------------------------------------------------------------------

B. nigra LR1-2 (6579) ----------------------------------------------------------------------------------------------------

B. carinata LR1-1 (6581) ----------------------------------------------------------------------------------------------------

B. carinata LR1-2 (6581) ----------------------------------------------------------------------------------------------------

B_rapa BnLRh1b (1767) ----------------------------------------------------------------------------------------------------

B_juncea BnLRh1b (1767) ----------------------------------------------------------------------------------------------------

B_napus BnLRh1b (1767) ----------------------------------------------------------------------------------------------------

B_oleracea BnLRh1b (1767) ----------------------------------------------------------------------------------------------------

8501 8600

Raphanus LR1-1 (8161) GATGCGGAGTTTGAGCTGCGGGGTGAGGGATGGGATAGACATAGCCATCTCTCCCTTCTCCGGCTCTTCTCTTATGGTCTCTAATGATGGCTTATCCACT

Raphanus LR1-2 (8161) GATGCGGAGTTTGAGCTGCGGGGTGAGGGATGGGATAGACATAGCCATCTCTCCCTTCTCCGGCTCTTCTCTTATGGTCTCTAATGATGGCTTATCCACT

Sinapis LR1-1 (7703) ----------------------------------------------------------------------------------------------------

Sinapis LR1-2 (7703) ----------------------------------------------------------------------------------------------------

B. nigra LR1-1 (6575) ----------------------------------------------------------------------------------------------------

B. nigra LR1-2 (6579) ----------------------------------------------------------------------------------------------------

B. carinata LR1-1 (6581) ----------------------------------------------------------------------------------------------------

B. carinata LR1-2 (6581) ----------------------------------------------------------------------------------------------------

B_rapa BnLRh1b (1767) ----------------------------------------------------------------------------------------------------

B_juncea BnLRh1b (1767) ----------------------------------------------------------------------------------------------------

B_napus BnLRh1b (1767) ----------------------------------------------------------------------------------------------------

B_oleracea BnLRh1b (1767) ----------------------------------------------------------------------------------------------------

8601 8700

Raphanus LR1-1 (8261) ACTACTTGCTTCCTTCCCTTTATCCTTCCTCACAACAACTTGCTCCTCTTCCTTATCATCTCTCACAACTGCCTCAATCAGTTTCCCTTTCTTCCCAGGT

Raphanus LR1-2 (8261) ACTACTTGCTTCCTTCCCTTTATCCTTCCTCACAACAACTTGCTCCTCTTCCTTATCATCTCTCACAACTGCCTCAATCAGTTTCCCTTTCTTCCCAGGT

Sinapis LR1-1 (7703) ----------------------------------------------------------------------------------------------------

Sinapis LR1-2 (7703) ----------------------------------------------------------------------------------------------------

B. nigra LR1-1 (6575) ----------------------------------------------------------------------------------------------------

B. nigra LR1-2 (6579) ----------------------------------------------------------------------------------------------------

B. carinata LR1-1 (6581) ----------------------------------------------------------------------------------------------------

B. carinata LR1-2 (6581) ----------------------------------------------------------------------------------------------------

B_rapa BnLRh1b (1767) ----------------------------------------------------------------------------------------------------

B_juncea BnLRh1b (1767) ----------------------------------------------------------------------------------------------------

B_napus BnLRh1b (1767) ----------------------------------------------------------------------------------------------------

B_oleracea BnLRh1b (1767) ----------------------------------------------------------------------------------------------------

8701 8800

Raphanus LR1-1 (8361) GCGCTTGATTGGGAAGAAAGATCTGGGGTGGGGAATCTATCAACTTGCAGCAGCCCCAGTCTTCCTTCTCCTTTGAGCACCGGCTTTTAATGGGTATGAA

Raphanus LR1-2 (8361) GCGCTTGATTGGGAAGAAAGATCTGGGGTGGGGAATCTATCAACTTGCAGCAGCCCCAGTCTTCCTTCTCCTTTGAGCACCGGCTTTTAATGGGTATGAA

Sinapis LR1-1 (7703) ----------------------------------------------------------------------------------------------------

Sinapis LR1-2 (7703) ----------------------------------------------------------------------------------------------------

B. nigra LR1-1 (6575) ----------------------------------------------------------------------------------------------------

B. nigra LR1-2 (6579) ----------------------------------------------------------------------------------------------------

B. carinata LR1-1 (6581) ----------------------------------------------------------------------------------------------------

B. carinata LR1-2 (6581) ----------------------------------------------------------------------------------------------------

B_rapa BnLRh1b (1767) ----------------------------------------------------------------------------------------------------

B_juncea BnLRh1b (1767) ----------------------------------------------------------------------------------------------------

B_napus BnLRh1b (1767) ----------------------------------------------------------------------------------------------------

B_oleracea BnLRh1b (1767) ----------------------------------------------------------------------------------------------------

8801 8900

Raphanus LR1-1 (8461) AGAACTAGATGGGAGGCCTTTTCCGGGTAAGAGAAATAGTAGTGAGAGGTAGTGAAAGCCCTTTCGTCCTTTATAACTAGTACATTTTATCGTGTAGATA

Raphanus LR1-2 (8461) AGAACTAGATGGGAGGCCTTTTCCGGGTAAGAGAAATAGTAGTGAGAGGTAGTGAAAGCCCTTTCGTCCTTTATAACTAGTACATTTTATCGTGTAGATA

Sinapis LR1-1 (7703) ----------------------------------------------------------------------------------------------------

Sinapis LR1-2 (7703) ----------------------------------------------------------------------------------------------------

B. nigra LR1-1 (6575) ----------------------------------------------------------------------------------------------------

B. nigra LR1-2 (6579) ----------------------------------------------------------------------------------------------------

B. carinata LR1-1 (6581) ----------------------------------------------------------------------------------------------------

B. carinata LR1-2 (6581) ----------------------------------------------------------------------------------------------------

B_rapa BnLRh1b (1767) ----------------------------------------------------------------------------------------------------

B_juncea BnLRh1b (1767) ----------------------------------------------------------------------------------------------------

B_napus BnLRh1b (1767) ----------------------------------------------------------------------------------------------------

B_oleracea BnLRh1b (1767) ----------------------------------------------------------------------------------------------------

8901 9000

Raphanus LR1-1 (8561) ACAGAGGCAAGCAGGACAGACGATCAATCCCTCTTCTAGTAATGGCACCACTCTTCTTAGGTTAGAACCCATTCCCATTGGCTTCCTACAGGTATAGTGA

Raphanus LR1-2 (8561) ACAGAGGCAAGCAGGACAGACGATCAATCCCTCTTCTAGTAATGGCACCACTCTTCTTAGGTTAGAACCCATTCCCATTGGCTTCCTACAGGTATAGTGA

Sinapis LR1-1 (7703) ----------------------------------------------------------------------------------------------------

Sinapis LR1-2 (7703) ----------------------------------------------------------------------------------------------------

B. nigra LR1-1 (6575) ----------------------------------------------------------------------------------------------------

B. nigra LR1-2 (6579) ----------------------------------------------------------------------------------------------------

B. carinata LR1-1 (6581) ----------------------------------------------------------------------------------------------------

B. carinata LR1-2 (6581) ----------------------------------------------------------------------------------------------------

B_rapa BnLRh1b (1767) ----------------------------------------------------------------------------------------------------

B_juncea BnLRh1b (1767) ----------------------------------------------------------------------------------------------------

B_napus BnLRh1b (1767) ----------------------------------------------------------------------------------------------------

B_oleracea BnLRh1b (1767) ----------------------------------------------------------------------------------------------------

9001 9100

Raphanus LR1-1 (8661) GATGTACAGGAAGACGGAGACCTTTTGAATTATAGACGACTAGTAGTGCGAAGCAATTCCATCCGATTTTCGAGAAAGAAAAGAGTGAGTTAGCTTATTT

Raphanus LR1-2 (8661) GATGTACAGGAAGACGGAGACCTTTTGAATTATAGACGACTAGTAGTGCGAAGCAATTCCATCCGATTTTCGAGAAAGAAAAGAGTGAGTTAGCTTATTT

Sinapis LR1-1 (7703) ----------------------------------------------------------------------------------------------------

Sinapis LR1-2 (7703) ----------------------------------------------------------------------------------------------------

B. nigra LR1-1 (6575) ----------------------------------------------------------------------------------------------------

B. nigra LR1-2 (6579) ----------------------------------------------------------------------------------------------------

B. carinata LR1-1 (6581) ----------------------------------------------------------------------------------------------------

B. carinata LR1-2 (6581) ----------------------------------------------------------------------------------------------------

B_rapa BnLRh1b (1767) ----------------------------------------------------------------------------------------------------

B_juncea BnLRh1b (1767) ----------------------------------------------------------------------------------------------------

B_napus BnLRh1b (1767) ----------------------------------------------------------------------------------------------------

B_oleracea BnLRh1b (1767) ----------------------------------------------------------------------------------------------------

9101 9200

Raphanus LR1-1 (8761) TTACGTCGGATGAAAGAGATAATTCTAACTAGCCGGAGACAGAGATATAGAAAGTTTGCAGTGCGGTATCGCCCATGACCTTCTGCGAGAGTGAGATAGA

Raphanus LR1-2 (8761) TTACGTCGGATGAAAGAGATAATTCTAACTAGCCGGAGACAGAGATATAGAAAGTTTGCAGTGCGGTATCGCCCATGACCTTCTGCGAGAGTGAGATAGA

Sinapis LR1-1 (7703) ----------------------------------------------------------------------------------------------------

Sinapis LR1-2 (7703) ----------------------------------------------------------------------------------------------------

B. nigra LR1-1 (6575) ----------------------------------------------------------------------------------------------------

B. nigra LR1-2 (6579) ----------------------------------------------------------------------------------------------------

B. carinata LR1-1 (6581) ----------------------------------------------------------------------------------------------------

B. carinata LR1-2 (6581) ----------------------------------------------------------------------------------------------------

B_rapa BnLRh1b (1767) ----------------------------------------------------------------------------------------------------

B_juncea BnLRh1b (1767) ----------------------------------------------------------------------------------------------------

B_napus BnLRh1b (1767) ----------------------------------------------------------------------------------------------------

B_oleracea BnLRh1b (1767) ----------------------------------------------------------------------------------------------------

9201 9300

Raphanus LR1-1 (8861) AAGCTGGAAGGTTGGATTGAATCGGATTATCCATTGAGCTAGTCCGTTTTCCTAGTAATGTAAAAAAATAACAAAAGATTCCCGACCAAGTATGATCTTA

Raphanus LR1-2 (8861) AAGCTGGAAGGTTGGATTGAATCGGATTATCCATTGAGCTAGTCCGTTTTCCTAGTAATGTAAAAAAATAACAAAAGATTCCCGACCAAGTATGATCTTA

Sinapis LR1-1 (7703) ----------------------------------------------------------------------------------------------------

Sinapis LR1-2 (7703) ----------------------------------------------------------------------------------------------------

B. nigra LR1-1 (6575) ----------------------------------------------------------------------------------------------------

B. nigra LR1-2 (6579) ----------------------------------------------------------------------------------------------------

B. carinata LR1-1 (6581) ----------------------------------------------------------------------------------------------------

B. carinata LR1-2 (6581) ----------------------------------------------------------------------------------------------------

B_rapa BnLRh1b (1767) ----------------------------------------------------------------------------------------------------

B_juncea BnLRh1b (1767) ----------------------------------------------------------------------------------------------------

B_napus BnLRh1b (1767) ----------------------------------------------------------------------------------------------------

B_oleracea BnLRh1b (1767) ----------------------------------------------------------------------------------------------------

9301 9400

Raphanus LR1-1 (8961) TATAATAATAATTCTAGCATTACTCGCAAGAGTGAGTTCACAATGCGGCTTGTCTGCGAACTTGTGGTGCAAAGATCAAGAAGGTAGAGAGAAAGTCGAT

Raphanus LR1-2 (8961) TATAATAATAATTCTAGCATTACTCGCAAGAGTGAGTTCACAATGCGGCTTGTCTGCGAACTTGTGGTGCAAAGATCAAGAAGGTAGAGAGAAAGTCGAT

Sinapis LR1-1 (7703) ----------------------------------------------------------------------------------------------------

Sinapis LR1-2 (7703) ----------------------------------------------------------------------------------------------------

B. nigra LR1-1 (6575) ----------------------------------------------------------------------------------------------------

B. nigra LR1-2 (6579) ----------------------------------------------------------------------------------------------------

B. carinata LR1-1 (6581) ----------------------------------------------------------------------------------------------------

B. carinata LR1-2 (6581) ----------------------------------------------------------------------------------------------------

B_rapa BnLRh1b (1767) ----------------------------------------------------------------------------------------------------

B_juncea BnLRh1b (1767) ----------------------------------------------------------------------------------------------------

B_napus BnLRh1b (1767) ----------------------------------------------------------------------------------------------------

B_oleracea BnLRh1b (1767) ----------------------------------------------------------------------------------------------------

9401 9500

Raphanus LR1-1 (9061) GAAAACTGCGGTCACAAGTTCTCACAGAAAGGATCGGAACACAACAGTAGTAGACTTAATAGGACCAACCCACCTCATCAATCTACGTATAACACATCTG

Raphanus LR1-2 (9061) GAAAACTGCGGTCACAAGTTCTCACAGAAAGGATCGGAACACAACAGTAGTAGACTTAATAGGACCAACCCACCTCATCAATCTACGTATAACACATCTG

Sinapis LR1-1 (7703) ----------------------------------------------------------------------------------------------------

Sinapis LR1-2 (7703) ----------------------------------------------------------------------------------------------------

B. nigra LR1-1 (6575) ----------------------------------------------------------------------------------------------------

B. nigra LR1-2 (6579) ----------------------------------------------------------------------------------------------------

B. carinata LR1-1 (6581) ----------------------------------------------------------------------------------------------------

B. carinata LR1-2 (6581) ----------------------------------------------------------------------------------------------------

B_rapa BnLRh1b (1767) ----------------------------------------------------------------------------------------------------

B_juncea BnLRh1b (1767) ----------------------------------------------------------------------------------------------------

B_napus BnLRh1b (1767) ----------------------------------------------------------------------------------------------------

B_oleracea BnLRh1b (1767) ----------------------------------------------------------------------------------------------------

9501 9600

Raphanus LR1-1 (9161) AGAGAGTGAAAGGGGTTCCTCCAGGCAGGCTGAAAAGAAAAGGAAAAGGGACAGGTGTACACCAAAGCGCTGCGCTCCTGCTGAAAAGAAATGAAAGGAA

Raphanus LR1-2 (9161) AGAGAGTGAAAGGGGTTCCTCCAGGCAGGCTGAAAAGAAAAGGAAAAGGGACAGGTGTACACCAAAGCGCTGCGCTCCTGCTGAAAAGAAATGAAAGGAA

Sinapis LR1-1 (7703) ----------------------------------------------------------------------------------------------------

Sinapis LR1-2 (7703) ----------------------------------------------------------------------------------------------------

B. nigra LR1-1 (6575) ----------------------------------------------------------------------------------------------------

B. nigra LR1-2 (6579) ----------------------------------------------------------------------------------------------------

B. carinata LR1-1 (6581) ----------------------------------------------------------------------------------------------------

B. carinata LR1-2 (6581) ----------------------------------------------------------------------------------------------------

B_rapa BnLRh1b (1767) ----------------------------------------------------------------------------------------------------

B_juncea BnLRh1b (1767) ----------------------------------------------------------------------------------------------------

B_napus BnLRh1b (1767) ----------------------------------------------------------------------------------------------------

B_oleracea BnLRh1b (1767) ----------------------------------------------------------------------------------------------------

9601 9700

Raphanus LR1-1 (9261) TTCTTTTCAAAAATGGGATAGACTACTCTGATAGGTCCGATTCCAGTTGGATAGCCAGATGGGTCCCAGTGGAAAAAGTTTCATCCTAGCTCGACTCCAA

Raphanus LR1-2 (9261) TTCTTTTCAAAAATGGGATAGACTACTCTGATAGGTCCGATTCCAGTTGGATAGCCAGATGGGTCCCAGTGGAAAAAGTTTCATCCTAGCTCGACTCCAA

Sinapis LR1-1 (7703) ----------------------------------------------------------------------------------------------------

Sinapis LR1-2 (7703) ----------------------------------------------------------------------------------------------------

B. nigra LR1-1 (6575) ----------------------------------------------------------------------------------------------------

B. nigra LR1-2 (6579) ----------------------------------------------------------------------------------------------------

B. carinata LR1-1 (6581) ----------------------------------------------------------------------------------------------------

B. carinata LR1-2 (6581) ----------------------------------------------------------------------------------------------------

B_rapa BnLRh1b (1767) ----------------------------------------------------------------------------------------------------

B_juncea BnLRh1b (1767) ----------------------------------------------------------------------------------------------------

B_napus BnLRh1b (1767) ----------------------------------------------------------------------------------------------------

B_oleracea BnLRh1b (1767) ----------------------------------------------------------------------------------------------------

9701 9800

Raphanus LR1-1 (9361) CTCCAACCTCTAGATCTAACTTCTAAAGCTACTAGCTACGTTCAGGGGCGAAGATCCTTAGTGAACTCTTTATTCATTCAATTCAACAAGGCGCTCGGGG

Raphanus LR1-2 (9361) CTCCAACCTCTAGATCTAACTTCTAAAGCTACTAGCTACGTTCAGGGGCGAAGATCCTTAGTGAACTCTTTATTCATTCAATTCAACAAGGCGCTCGGGG

Sinapis LR1-1 (7703) ----------------------------------------------------------------------------------------------------

Sinapis LR1-2 (7703) ----------------------------------------------------------------------------------------------------

B. nigra LR1-1 (6575) ----------------------------------------------------------------------------------------------------

B. nigra LR1-2 (6579) ----------------------------------------------------------------------------------------------------

B. carinata LR1-1 (6581) ----------------------------------------------------------------------------------------------------

B. carinata LR1-2 (6581) ----------------------------------------------------------------------------------------------------

B_rapa BnLRh1b (1767) ----------------------------------------------------------------------------------------------------

B_juncea BnLRh1b (1767) ----------------------------------------------------------------------------------------------------

B_napus BnLRh1b (1767) ----------------------------------------------------------------------------------------------------

B_oleracea BnLRh1b (1767) ----------------------------------------------------------------------------------------------------

9801 9900

Raphanus LR1-1 (9461) GGACGAAAGGAGAGCCAATGGCGAAACCAAAGAGAGAGGCGGCCTGGTGGGGACACCACGATACGATAGGGGATAAGGGCGAAGTTAAGTAAGGGCTCCT

Raphanus LR1-2 (9461) GGACGAAAGGAGAGCCAATGGCGAAACCAAAGAGAGAGGCGGCCTGGTGGGGACACCACGATACGATAGGGGATAAGGGCGAAGTTAAGTAAGGGCTCCT

Sinapis LR1-1 (7703) ----------------------------------------------------------------------------------------------------

Sinapis LR1-2 (7703) ----------------------------------------------------------------------------------------------------

B. nigra LR1-1 (6575) ----------------------------------------------------------------------------------------------------

B. nigra LR1-2 (6579) ----------------------------------------------------------------------------------------------------

B. carinata LR1-1 (6581) ----------------------------------------------------------------------------------------------------

B. carinata LR1-2 (6581) ----------------------------------------------------------------------------------------------------

B_rapa BnLRh1b (1767) ----------------------------------------------------------------------------------------------------

B_juncea BnLRh1b (1767) ----------------------------------------------------------------------------------------------------

B_napus BnLRh1b (1767) ----------------------------------------------------------------------------------------------------

B_oleracea BnLRh1b (1767) ----------------------------------------------------------------------------------------------------

9901 10000

Raphanus LR1-1 (9561) CGGATAATCTATATAATCTATCAATAGAAGTCTCTTCACCACATGATGATACCCATGCTCGAAGGGGAACCTTCAAAGCAGGATTTGAGTTCTATAGCTA

Raphanus LR1-2 (9561) CGGATAATCTATATAATCTATCAATAGAAGTCTCTTCACCACATGATGATACCCATGCTCGAAGGGGAACCTTCAAAGCAGGATTTGAGTTCTATAGCTA

Sinapis LR1-1 (7703) ----------------------------------------------------------------------------------------------------

Sinapis LR1-2 (7703) ----------------------------------------------------------------------------------------------------

B. nigra LR1-1 (6575) ----------------------------------------------------------------------------------------------------

B. nigra LR1-2 (6579) ----------------------------------------------------------------------------------------------------

B. carinata LR1-1 (6581) ----------------------------------------------------------------------------------------------------

B. carinata LR1-2 (6581) ----------------------------------------------------------------------------------------------------

B_rapa BnLRh1b (1767) ----------------------------------------------------------------------------------------------------

B_juncea BnLRh1b (1767) ----------------------------------------------------------------------------------------------------

B_napus BnLRh1b (1767) ----------------------------------------------------------------------------------------------------

B_oleracea BnLRh1b (1767) ----------------------------------------------------------------------------------------------------

10001 10072

Raphanus LR1-1 (9661) TACAACTCTGGGGAATCGGCGTGCAGGAGCGTACTGCAGAACTATGACCCATACAGTGGAAGCTCTGGTCCC

Raphanus LR1-2 (9661) TACAACTCTGGGGAATCGGCGTGCAGGAGCGTACTGCAGAACTATGACCCATACAGTGGAAGCTCTGGTCCC

Sinapis LR1-1 (7703) ------------------------------------------------------------------------

Sinapis LR1-2 (7703) ------------------------------------------------------------------------

B. nigra LR1-1 (6575) ------------------------------------------------------------------------

B. nigra LR1-2 (6579) ------------------------------------------------------------------------

B. carinata LR1-1 (6581) ------------------------------------------------------------------------

B. carinata LR1-2 (6581) ------------------------------------------------------------------------

B_rapa BnLRh1b (1767) ------------------------------------------------------------------------

B_juncea BnLRh1b (1767) ------------------------------------------------------------------------

B_napus BnLRh1b (1767) ------------------------------------------------------------------------

B_oleracea BnLRh1b (1767) ------------------------------------------------------------------------

Part B, fasta

Left portion of homology with B. rapa, juncea, napus and oleracea

>Raphanus_LR1-1

.......................................................................................................................................................................................................................................................................................................................................................................................................................................................................................................................................................................................................................................................................................................................................................................................................................................................................................................................................................................................................................................................................................................................................AAGAAGAAGGATGGAGCAGAAAGATAGAAAGATCAGTTGCTGGAAATCAAATATGTAAATAGTCGAGTTATTGCATTCCTCTCACAAACTATCAATTTCATAAGAGAAGAAAGATCGTTTTTCGAAACTATCAATTTCATAAGAGAAGAAAGATCGTTTTTCGAAACTATCAA....TTTCATAAGAGAAGAAAGATCGTTTTTCGAAAAGAAAGAAGGTTTTGATTCGAGGCGGATCCCTTTTTTCTTTGCCTTTACGAGTAAGAAAGTGGTTACGCTCCGCTGGGGAGCCGGAACTGTAAATTCCTACTGTGGTTCGAGTCCACAAACCACTGAGAGCTCTGGCATCGGTTCAGGCTAAATCCTGAAGAAAGCTAGAAAGCGCTGTTTGATGAGCCTGCGTCCGATTTGTGAGTTGGTTAGGTAAAGGCTGACCAAGCCAATGATGCTTAGCTGCCCAGTCGTGCCGAGGAATTCCCATCCGACCAGAGGAGGGAAGAGAGTGACTAAGCAGCAGCTCCACTTGTCGCGTACTTCTTTAGCTGCACCGTCATCGCCGGCCGGACAAACCCTTCCAACAAATGGGGAGTGGGCCAAAGGAACACGACACATCCAGTGAAGAGATCCCGGACAGGGAAGTCAGAAGGTCTGCAAGCCTCGTCTTCGCCCCTGCTTTAGCTGCACTTGGTGCGTAAGAGGGAGACCCGGTCGCTCAGATACAGACAGCAGCTCATTTTACGCTTAAACACATCCCAGGGAATTACAGGAATACGGGCTCCGCCTAGCTACCTGATCCCATCATGAATAGGAATTACCAGCGAACCAAGAGAGATAGATTCAACAGAGGAGAAGGGGTGGCGTGCTTTAGCGACACCTTCAAGACATCCAGGAGTGATCTAGACGAGGTGGGACATGCCGGCTAGAGTACATGCTTCAACTGGAACATCGCTTCGCTACTCTTCCCTCCCTACCCCTACGGTCGTACACTCTGTTGATAGTTCGCCAATGGCTCACAACCAGACAATCATAGTATGTTCGTTCGTTCACTTCGTTCTCTCTCTCCCCTTCTCCCGTTAGCTTGTTCCCCTCCTCCCTTCCCAACCTTCCCAGCCCTTCCTCCAAGAGTAGTTACGCCTTTTCCGTCAGTGGAGAGAGCGAGCAACGACCTGTGAGCGACCGTAGCTCCCTCTGCAAGTGGTAAGGCGCAGTTCACCCCCTATCGAACGGAGGAAGATCGCTGTTGATGTCATGACTAACTTCTTGATTCTTTGATGAGAGAGGCGTGCGTGTGAAATGTCTGATTCATGGCTTGGTTAACGAGATGTCCCAACTGGTACTGGAGCACACCCGTCTGGTTCGTACCATCATTGGCTTGTTCATCCTTTACCTAAGCCTAATCTTCTTCTTCATAGCACACTCTGCTACA.....GCACA............CTA..CGCTTCTGTG....CTGCTCA......GTAGTGACTGCTAGGGAGT.TAATCACACCAGGCGGGCTTG..CTTCGCTAGAAAAG......AATTCCACTAGTGTGTGCTGCTGAGAGTGAACTATGTTACTCGGAACAA.....TATCTGAAAG....GAAGCTTAAGGAAAGGCCTTAGTATTCTTTCTTCAAAG..........GCGTTCCCTGAACAACT..ACAGCTCGATAGAGACAACTCGGA..AAC..TAGCACTGAAAAAGGGC..ATACTATCAAT..ATGATCAATATGATAT...TACCTCGG.TGTGCTAATCAAAGG..TAAAGAACTGAATACCTAGATTTCTCTTATCCTTCCTTAGGTCCTCATGAATTAGAATAAAGTAAGGGAGCACACCGATCGAAACCTGTTTACTTTCGAAAGTTGACCCGCCACCTACTACTTGTAGTCAACCAAAATTGCTTCGCTAGGAGTGTGCTATTAAAAGCTGTTGATCGGCCTATGGCACTTTACTAAACCTAGGAGAGGAGAACTGCTACTATCTATTGCATGGGTGCCTGCGTGTAAGAGGTGTAAGAGAAAGAAAGAAATTTCCGTCAACAGGATGAATCCCAGCGAAAAGAAGGCGGAAAGCCTATGAAAGGTGGAAAGCCCTAGCGGAGCAATCTTAAAGATGGAAAGCTCTTAAAGGTGGAAAGCCAGCACAAGCACACTACTGTGAAAGCTAAGAGTACTTCTATATTAGGAATTTTGCTAGTGGCGGATACGTACTATCTTCTTTATATTGACATTCTGCTACCCGGGAATCCAGTTCGTAAAACTCGGAGATATCAAACGGAAGTAAAAAAAAGCAGAGAAGGATTAAGACTAACCACTTTTTCGACATCCCTTCATGAAGCGCAGCAACATTTCGGAAGACTGCTAAAAGCGAGAAGTCCTGACCTTCGTTACTAGAGCACAGAAAAAGCAACAGTGTGCTGTACAGAGAACTTGCTTCGATAGGAAAAGAAAAGCTGTATTTCTAAGCTGGGAATGTTGGGTAAGAGTCCGCCTATTACCTCTAAAAAGTGGAGGAGGTGAGATCCCTGTTGGAGTCAACTTTTGAATTTACCGGCTTTGGAGAAACCTTTTCAGTTGCTTAGTGCGAATCCCACGTTTCGAGGGTGGGTAAGGTCTCAGTACCTCGGATATAGCACAGAAAGGCCTATAGCATCCAATACCACTTTTCAGGTTACTTCCTTGTGAGCTTGTCAGACAAAGTAGGCGACGGTGTGCTGCACTACATCTCCTCAGCAGTTGATCGGTCAGGTTCCTTGCCTTGCTTAACCCAGCTCGAGTATTATTCGAAACGAGGAATATCCTTACTCTAGAAGCTCAGAGTTAAGAGTTAAGGGAAGGTGTTAGCTAAGGAATTAGGTCTTCCTCTTCGAAAGGAGAACTCTAGTCTACCGTGGTGGGTAGTAGCTACTCCCAGTACATCTATCATCCGTGACATCCATGGCAACTACTACTTTTCATTGCTGTGCTGTTTAATCGATCGAACAAAACTCCTAAGGTAGAGATCTTAAGAAGAGGACGAGCTCAACTCCCGATTGTTCAAGCTTAGATACCTCTTTGATTTGGGATTGACGAAACAGTATAAACCTTTCTAATAGGCCTATTTTGTGCGTTTAATCACCTTTCTTTCATCTCTGAGCCAGCTATCCTTTCAGAATAGGGCTTTCCGCTTTCTTTTAAGGTGAGGAATCTTAGGAGTTCAGCTTTTTCGATTAAACGAAGAATTCTGTCATTTCAGATGGGATTCCAAAGCAAGGCTAGTTATCTATGTTAGCTTCATTCCTGTGAAGTTGGTTTCTAGTTTTGATCTTTGAGTTGGCAGTAACATGACTAGCAGCATAGTACGCACACACGAAAGTCAAGGGATTGTCTGGCCCTGCTACCTACCCAACATGAGCACACTCCGAAATTAGAGTAGCTATCTATTTCATAAGAGACCTCTTGCAGATTGAAGCATGATTGGGCTCTCCGCTTCTCTTCAGATGGAACTTCGCCATGTCCATGTCCCTCGAGTACTGTTCCTAGAGTATAGTAGAGTACGGATCGATTGAACTGGTTTCTGTCGTACCCCTAACGGTACAGTTATGACCTAATGCGGGGTCTCTCTCAGGCAGAAGATCAACCGATGTACGATGTTGGACCTAATGAGAGGTCCTTCTCTGTCAGGGTTTATAGGTCAACTGGTTGCTTCGCTAGAGTAGGACCTAACCCATGTACTGTGAGTGTTGATTAGTCACCCTGATATCGAGTGAGCATTCGGGGGTGTAGACTTCACACTTTAACAGGTCATCTGTCTTTCGAAGTTTTCTGTAACACAGAGATGTAGTTGCAAGGCAAAGGTCAACTAGCTTGCTTCGCTAGGTTGCTTCGCTAGGGACTTAAGGAGAAGTGATTTTCTGTAGCACAGAGATGACTTTAGTAAGTTGCAAGGCGAAGGCCTCAACGATTGTGGTTAATCTATCTTGGTATCTTTGTGATGAGGTATGGCTTATCTGTGCTGGGGTGTGCTTGGGAGTCAAATGCTAGGGTCATGCGAAAAGTCCTATTTCCAATTCCGATCTCATATCTAAGGAACGGGAGTTCTTAACAGAAGAAAGGCCATAGACTCCGTTTGGTACGTATCTGATATGTGACAAATCCTAAATCTGCAAGGTATCTTATCTCTCTCAGTTATTAATATGGTGCTGGACTAGCGAAGCAACCCTTTTGAAGAAGGAATCTTAGGAGTTCTGCAGCATATGGATGGCTTAAAGGAAGAAATCAGACATCTGAGATAAGCAGGGCTGTTGTCTAATCTGAGGAATGCATACGAATCCTATAGTAAGTTCACGGGTAATTCTCCGCTTAGTTCAGTAATCTCCTGAAAGTTGGGTGAGCTATTCTGTTTTCCGAGGTACCAACACTTTCAACCACTTTATTTCCGAGGTCCTAAACCTTAAACCAGTTTTTAAACGCGATTAAACGCAGATCAGCGACATCCGTTTTCCAAGGACTAGCGAAGCAACCGTAAATCTGATACTTTGCTATAGTTTGCTACTTTTTCTGGGTATCGAGGAAGTATTCGAAGTCTGCCTTGGTTCAGCACACTATTCCGCGCATCTCCCACTCGCTTACTGGCAGAAGGTCTGCAAGCCTAGCCCCTTCTCTTTATCGAGGGCAACTCATGCTTATAGGGCACTCCCGGGATGGAACCAGCGATAATTACTTCCACTCAAAGGGATCGGATTATGAACCACTCCTAGCTGCTTTCTTTCAAACCTTTCCATCTGAAGTTGATTCTATAGGTGCAGTTGCAGTTCTAGCTCTTTCTTTAGTTGCTGGAGATGTAATACGACTAGCATCAAGCCTTCCTTCTTCAGTAATAGTTCCAGTGGAGGAAGAAGAAGAGCAGATCGCTTTAGACTGCCTCCCTTACTAAACAAGATAGGCTCGCTTCATCTGAGCCGTCGCCCCTTTCAATAGGTGTAGGCATCGGGCCGATTCTCCTTTGCCTATCTTCCTGCTCTGCCAGTATACCTCCTTGCAAACCTCCCTTCCCTTAGCTTTCAATCTGTCTTGTGCCACTCCAGCTTTCACTCAAGCCATTCTTTGAACATACTTTATAGGGGCGACCTTCACTCTTCTTCTCGCTTCCTAACCCTAAAAGCTCACTTCTTTTGGTGTTGCTCCACGATCTTAAAGTGGAACTACGAGATAAATAAGCGGCGGGCTGATCTGACCTGCGCGTCTGCCTTCCTTTCGTCACTACGACTTGGTTTCGAAAGAAGGAATGAGCGCTAGCCTAGCTAACTAGCATACCTTTCCTTGCCTCTTGCTCCGTAAAATGCTATCACATTTTGATTCCAATCATCTCATCTTTGTCCCGTTGAGAAGTTTAGTGGATGAACACTAGAATTGAGTTGCATGAAATACCTGGCAATTCTTGAGATAGGGCTCATCAGACTTTCTTAGTGAGAGTCCCAGTGGTACAGACTATGTCAAAGCTGATCTTTGAAGTACGATCGGAGGAGATACCCGGCAGTGAAAGCTTTCCTCTCCTTTTAGTCGAGTTACGTCAGTACCTCTCGCAATAAATGCTCGAGTTCCCTCTTTTAAAAGAGTAATAAATTACCTTGGACCCTATCCTC.TCTGATAGATGATCTTGCTTGGGCCACTGAAGAAGAAGAATATTGAGGAATTGGACTTAGCATTCTATCTAATGCTTTGATCCATCTAAGCCCATTGACAAGCAGGAAGAGGAGAGGGGGCTTTTGGGATAATTATGATACTGAGCCCAATGGAAAAGCCCACGCCCGAGTCCAAAATGGAATTACTGGGGAAACGAATCCAAGAAAGCCCAAAAACAAAAGTGTGGAGAAGGGGACTTATTGTACTGAAAAAGTGATTGTGCTCATTTACTCTATACGCGTCTTAGTGGACTGACAGAGTGAGCTGGAAAGGTTCCGTCTTTCCGGGGAAATTCAAGAGAGCTAGCTTCGGTGCTCACCAAAGGACGGAGCTGTCGAGTAAGGATTGGCCGAAGTCAGTTACCTGGGAATCAGCCAATAAAAAATAGACAAATAAAAGCGTGATCTGAGTAGGCAGAGCTAAATAGTGCACGTAGGGTAAACGAGGACTCTGGTCAGCTTTGAGCTGTCGAGTAAGGAGTGACGGGCCTTTGGAAACCCGAGAAAAGCGGGGGAGTACTCTATACAGTGCGTTCTATTATTGCCTCTTATTCCCGAGGGAGTGGTCGTAATTAAGCCGCGTGGCAATACCCGCCAAAAAGGACTCTTTGATTTTGAGGGGCGGGGCCTTTATCCAGGGGAGAATTCTTCAGCGCACTAAAATCTAGTTAAGGGGGTTCCATATTCATGAAAAGCCGGGGTTGAACCATGTTACGGAACTAAGACAAGAATTATGACTAATAAGAAAGGGTTTAGGGCCTGCCTATAAATAGAAGCTTCTTTCAGTCTCTATTTGGCAAAGAGGGCACTTAGAAGTCGGCAAGAAAGTGAGTAGACATGGATATCGCGAACAGACTGGCGAGCATTCAACAAGAAATACAAACCGTGGAAAACGAAAAGCTCCAATGTGAGCAAATGCTTGGTCTGTTCTGGGAGCATCCGCCTGCTCTCGATCCGGAGGTCGTGGGCAGAAGGATGCAACTTTTACGGGACCGCATTCGCGGTCTGAAACACAGGATTTCTTTTCTCCTGAAGGAGCAGGAAGGCCTAATAATACAGGCTGTCACCCACGGTCGCCGGGGAGACTAGAATAGAAGAGTCCGCCAACTTCCTATATCGCTAAAATGGAAAATAAGGAGTCCGTCGACCCAAAGTCTTGTATGCTTGCTCTATGTCTTTGGTTTATGTACTATGTTCTTAGTTTCCTTTTTAATGGTGTGTGGCTGGTCTACGGTGTGTGTAGGCTTCCTATTTTATGTATGCTTGTAATGCTTCTGCTTTGTCAAATATTCCTTTGAATATCCGGTCTTCATCTTCCTTAGATTAGATGCTACTTCCTTCGTCTAACGCACTGCCCCACAGATAATCAAAGTCTGTAATAGCGGACGATTCTATCAAACCCTAAAGTAGAAGAAAAAGTAGAAGCTACGAAACCATAAAGCTTCCCTCCTGTTTGAAACAGAAAGCATTGATATCATTGGACACTAAAGGGTCAAACTTTGCTTTGTGCTGTTCACATAGTCGACTGGGAAACGGAAAATCTCATTAATCTTAGTATTACAGACTTTTTACGAAGCGAGAGGAAAAGACGGCAAAGTCTTAACTAAACCCTGAAAGCCTAAAAAAACGAACTTCCTTCAATGCCTTCTCATTAGTATCTGCTGTGTCGCTAAGCATTCTTTCCATCCGCTAATGGACCTCTTGATGCTCGACCAGCCATCAACCGCATCTGACTTTGATCCATAAGTAGATTCAATAGGAGGGTACCATCTCGCTTCTCTTTCCTTGTACGTTCCAGCTCGCTTCGTCTGCTTCAGAGTGGGAAAAGAAGAAGGTAGAAAACCGAGGTGAGCAAAAGGCTCTTTCTTCTTAATACGCTTAGATAGTTCATTGACTTACGCTTAGATTAGATAGTTCATTGACTACGAGACTGGAATCTGATGCTTCTTTATGGTCCGATCCTAAAAGCAAGAGAAGTTTAGGTAGGAGTACGTCGCTTCTTTCTTTTTCATATCTGCTGTCCCAGCTGAGTTCCGCTATCAACTAATTATAGTCGCATAGCAAGCGATGTAATAAATCACTGAGATCTTTTGAATTTCAAGTAAATCATAGATAAAGCATTAAGTAGGAGCGGTAGCTTTCTGCTTCGGTTGGCGCGTTGCAGTAATGAAGAAAAGAATGAGATTGGTTCGGTCTTAAGTCTTTGGGTGAATCAATTTAGGTATCGAAGTTTTAGTTATTGCCATCCCTTGCTTGGCAGCAGTGGGCTTGGTAGTAGCATAGGTGGGTCCTCGGGCAGTTTTTTCAGGGCGTAGGGATCACTGTCTCACTGTGGTACCCGAAAACTTTCTATGCCCACATTTCATAGTTTGAAAGCGCTCTTTAGTGACTTTGTTTGAAAGCGCTCTTTAGTGACTTTCATGTCTTCTGCTACTTTGACTTTAGGAAGATTCAGACAGTCTTTTATGCCCTCTTTTAGGTTTGTTTTTTCCTTCCCCCAATTCTAGGATGCGTAGTAGCTCTAGTAAGTCCGTAGCTGGATCTGGCAGGATGCGGAGTTTGAGCTGCGGGGTGAGGGATGGGATAGACATAGCCATCTCTCCCTTCTCCGGCTCTTCTCTTATGGTCTCTAATGATGGCTTATCCACTACTACTTGCTTCCTTCCCTTTATCCTTCCTCACAACAACTTGCTCCTCTTCCTTATCATCTCTCACAACTGCCTCAATCAGTTTCCCTTTCTTCCCAGGTGCGCTTGATTGGGAAGAAAGATCTGGGGTGGGGAATCTATCAACTTGCAGCAGCCCCAGTCTTCCTTCTCCTTTGAGCACCGGCTTTTAATGGGTATGAAAGAACTAGATGGGAGGCCTTTTCCGGGTAAGAGAAATAGTAGTGAGAGGTAGTGAAAGCCCTTTCGTCCTTTATAACTAGTACATTTTATCGTGTAGATAACAGAGGCAAGCAGGACAGACGATCAATCCCTCTTCTAGTAATGGCACCACTCTTCTTAGGTTAGAACCCATTCCCATTGGCTTCCTACAGGTATAGTGAGATGTACAGGAAGACGGAGACCTTTTGAATTATAGACGACTAGTAGTGCGAAGCAATTCCATCCGATTTTCGAGAAAGAAAAGAGTGAGTTAGCTTATTTTTACGTCGGATGAAAGAGATAATTCTAACTAGCCGGAGACAGAGATATAGAAAGTTTGCAGTGCGGTATCGCCCATGACCTTCTGCGAGAGTGAGATAGAAAGCTGGAAGGTTGGATTGAATCGGATTATCCATTGAGCTAGTCCGTTTTCCTAGTAATGTAAAAAAATAACAAAAGATTCCCGACCAAGTATGATCTTATATAATAATAATTCTAGCATTACTCGCAAGAGTGAGTTCACAATGCGGCTTGTCTGCGAACTTGTGGTGCAAAGATCAAGAAGGTAGAGAGAAAGTCGATGAAAACTGCGGTCACAAGTTCTCACAGAAAGGATCGGAACACAACAGTAGTAGACTTAATAGGACCAACCCACCTCATCAATCTACGTATAACACATCTGAGAGAGTGAAAGGGGTTCCTCCAGGCAGGCTGAAAAGAAAAGGAAAAGGGACAGGTGTACACCAAAGCGCTGCGCTCCTGCTGAAAAGAAATGAAAGGAATTCTTTTCAAAAATGGGATAGACTACTCTGATAGGTCCGATTCCAGTTGGATAGCCAGATGGGTCCCAGTGGAAAAAGTTTCATCCTAGCTCGACTCCAACTCCAACCTCTAGATCTAACTTCTAAAGCTACTAGCTACGTTCAGGGGCGAAGATCCTTAGTGAACTCTTTATTCATTCAATTCAACAAGGCGCTCGGGGGGACGAAAGGAGAGCCAATGGCGAAACCAAAGAGAGAGGCGGCCTGGTGGGGACACCACGATACGATAGGGGATAAGGGCGAAGTTAAGTAAGGGCTCCTCGGATAATCTATATAATCTATCAATAGAAGTCTCTTCACCACATGATGATACCCATGCTCGAAGGGGAACCTTCAAAGCAGGATTTGAGTTCTATAGCTATACAACTCTGGGGAATCGGCGTGCAGGAGCGTACTGCAGAACTATGACCCATACAGTGGAAGCTCTGGTCCC

>Raphanus_LR1-2

.......................................................................................................................................................................................................................................................................................................................................................................................................................................................................................................................................................................................................................................................................................................................................................................................................................................................................................................................................................................................................................................................................................................................................AAGAAGAAGGATGGAGCAGAAAGATAGAAAGATCAGTTGCTGGAAATCAAATATGTAAATAGTCGAGTTATTGCATTCCTCTCACAAACTATCAATTTCATAAGAGAAGAAAGATCGTTTTTCGAAACTATCAATTTCATAAGAGAAGAAAGATCGTTTTTCGAAACTATCAA....TTTCATAAGAGAAGAAAGATCGTTTTTCGAAAAGAAAGAAGGTTTTGATTCGAGGCGGATCCCTTTTTTCTTTGCCTTTACGAGTAAGAAAGTGGTTACGCTCCGCTGGGGAGCCGGAACTGTAAATTCCTACTGTGGTTCGAGTCCACAAACCACTGAGAGCTCTGGCATCGGTTCAGGCTAAATCCTGAAGAAAGCTAGAAAGCGCTGTTTGATGAGCCTGCGTCCGATTTGTGAGTTGGTTAGGTAAAGGCTGACCAAGCCAATGATGCTTAGCTGCCCAGTCGTGCCGAGGAATTCCCATCCGACCAGAGGAGGGAAGAGAGTGACTAAGCAGCAGCTCCACTTGTCGCGTACTTCTTTAGCTGCACCGTCATCGCCGGCCGGACAAACCCTTCCAACAAATGGGGAGTGGGCCAAAGGAACACGACACATCCAGTGAAGAGATCCCGGACAGGGAAGTCAGAAGGTCTGCAAGCCTCGTCTTCGCCCCTGCTTTAGCTGCACTTGGTGCGTAAGAGGGAGACCCGGTCGCTCAGATACAGACAGCAGCTCATTTTACGCTTAAACACATCCCAGGGAATTACAGGAATACGGGCTCCGCCTAGCTACCTGATCCCATCATGAATAGGAATTACCAGCGAACCAAGAGAGATAGATTCAACAGAGGAGAAGGGGTGGCGTGCTTTAGCGACACCTTCAAGACATCCAGGAGTGATCTAGACGAGGTGGGACATGCCGGCTAGAGTACATGCTTCAACTGGAACATCGCTTCGCTACTCTTCCCTCCCTACCCCTACGGTCGTACACTCTGTTGATAGTTCGCCAATGGCTCACAACCAGACAATCATAGTATGTTCGTTCGTTCACTTCGTTCTCTCTCTCCCCTTCTCCCGTTAGCTTGTTCCCCTCCTCCCTTCCCAACCTTCCCAGCCCTTCCTCCAAGAGTAGTTACGCCTTTTCCGTCAGTGGAGAGAGCGAGCAACGACCTGTGAGCGACCGTAGCTCCCTCTGCAAGTGGTAAGGCGCAGTTCACCCCCTATCGAACGGAGGAAGATCGCTGTTGATGTCATGACTAACTTCTTGATTCTTTGATGAGAGAGGCGTGCGTGTGAAATGTCTGATTCATGGCTTGGTTAACGAGATGTCCCAACTGGTACTGGAGCACACCCGTCTGGTTCGTACCATCATTGGCTTGTTCATCCTTTACCTAAGCCTAATCTTCTTCTTCATAGCACACTCTGCTACA.....GCACA............CTA..CGCTTCTGTG....CTGCTCA......GTAGTGACTGCTAGGGAGT.TAATCACACCAGGCGGGCTTG..CTTCGCTAGAAAAG......AATTCCACTAGTGTGTGCTGCTGAGAGTGAACTATGTTACTCGGAACAA.....TATCTGAAAG....GAAGCTTAAGGAAAGGCCTTAGTATTCTTTCTTCAAAG..........GCGTTCCCTGAACAACT..ACAGCTCGATAGAGACAACTCGGA..AAC..TAGCACTGAAAAAGGGC..ATACTATCAAT..ATGATCAATATGATAT...TACCTCGG.TGTGCTAATCAAAGG..TAAAGAACTGAATACCTAGATTTCTCTTATCCTTCCTTAGGTCCTCATGAATTAGAATAAAGTAAGGGAGCACACCGATCGAAACCTGTTTACTTTCGAAAGTTGACCCGCCACCTACTACTTGTAGTCAACCAAAATTGCTTCGCTAGGAGTGTGCTATTAAAAGCTGTTGATCGGCCTATGGCACTTTACTAAACCTAGGAGAGGAGAACTGCTACTATCTATTGCATGGGTGCCTGCGTGTAAGAGGTGTAAGAGAAAGAAAGAAATTTCCGTCAACAGGATGAATCCCAGCGAAAAGAAGGCGGAAAGCCTATGAAAGGTGGAAAGCCCTAGCGGAGCAATCTTAAAGATGGAAAGCTCTTAAAGGTGGAAAGCCAGCACAAGCACACTACTGTGAAAGCTAAGAGTACTTCTATATTAGGAATTTTGCTAGTGGCGGATACGTACTATCTTCTTTATATTGACATTCTGCTACCCGGGAATCCAGTTCGTAAAACTCGGAGATATCAAACGGAAGTAAAAAAAAGCAGAGAAGGATTAAGACTAACCACTTTTTCGACATCCCTTCATGAAGCGCAGCAACATTTCGGAAGACTGCTAAAAGCGAGAAGTCCTGACCTTCGTTACTAGAGCACAGAAAAAGCAACAGTGTGCTGTACAGAGAACTTGCTTCGATAGGAAAAGAAAAGCTGTATTTCTAAGCTGGGAATGTTGGGTAAGAGTCCGCCTATTACCTCTAAAAAGTGGAGGAGGTGAGATCCCTGTTGGAGTCAACTTTTGAATTTACCGGCTTTGGAGAAACCTTTTCAGTTGCTTAGTGCGAATCCCACGTTTCGAGGGTGGGTAAGGTCTCAGTACCTCGGATATAGCACAGAAAGGCCTATAGCATCCAATACCACTTTTCAGGTTACTTCCTTGTGAGCTTGTCAGACAAAGTAGGCGACGGTGTGCTGCACTACATCTCCTCAGCAGTTGATCGGTCAGGTTCCTTGCCTTGCTTAACCCAGCTCGAGTATTATTCGAAACGAGGAATATCCTTACTCTAGAAGCTCAGAGTTAAGAGTTAAGGGAAGGTGTTAGCTAAGGAATTAGGTCTTCCTCTTCGAAAGGAGAACTCTAGTCTACCGTGGTGGGTAGTAGCTACTCCCAGTACATCTATCATCCGTGACATCCATGGCAACTACTACTTTTCATTGCTGTGCTGTTTAATCGATCGAACAAAACTCCTAAGGTAGAGATCTTAAGAAGAGGACGAGCTCAACTCCCGATTGTTCAAGCTTAGATACCTCTTTGATTTGGGATTGACGAAACAGTATAAACCTTTCTAATAGGCCTATTTTGTGCGTTTAATCACCTTTCTTTCATCTCTGAGCCAGCTATCCTTTCAGAATAGGGCTTTCCGCTTTCTTTTAAGGTGAGGAATCTTAGGAGTTCAGCTTTTTCGATTAAACGAAGAATTCTGTCATTTCAGATGGGATTCCAAAGCAAGGCTAGTTATCTATGTTAGCTTCATTCCTGTGAAGTTGGTTTCTAGTTTTGATCTTTGAGTTGGCAGTAACATGACTAGCAGCATAGTACGCACACACGAAAGTCAAGGGATTGTCTGGCCCTGCTACCTACCCAACATGAGCACACTCCGAAATTAGAGTAGCTATCTATTTCATAAGAGACCTCTTGCAGATTGAAGCATGATTGGGCTCTCCGCTTCTCTTCAGATGGAACTTCGCCATGTCCATGTCCCTCGAGTACTGTTCCTAGAGTATAGTAGAGTACGGATCGATTGAACTGGTTTCTGTCGTACCCCTAACGGTACAGTTATGACCTAATGCGGGGTCTCTCTCAGGCAGAAGATCAACCGATGTACGATGTTGGACCTAATGAGAGGTCCTTCTCTGTCAGGGTTTATAGGTCAACTGGTTGCTTCGCTAGAGTAGGACCTAACCCATGTACTGTGAGTGTTGATTAGTCACCCTGATATCGAGTGAGCATTCGGGGGTGTAGACTTCACACTTTAACAGGTCATCTGTCTTTCGAAGTTTTCTGTAACACAGAGATGTAGTTGCAAGGCAAAGGTCAACTAGCTTGCTTCGCTAGGTTGCTTCGCTAGGGACTTAAGGAGAAGTGATTTTCTGTAGCACAGAGATGACTTTAGTAAGTTGCAAGGCGAAGGCCTCAACGATTGTGGTTAATCTATCTTGGTATCTTTGTGATGAGGTATGGCTTATCTGTGCTGGGGTGTGCTTGGGAGTCAAATGCTAGGGTCATGCGAAAAGTCCTATTTCCAATTCCGATCTCATATCTAAGGAACGGGAGTTCTTAACAGAAGAAAGGCCATAGACTCCGTTTGGTACGTATCTGATATGTGACAAATCCTAAATCTGCAAGGTATCTTATCTCTCTCAGTTATTAATATGGTGCTGGACTAGCGAAGCAACCCTTTTGAAGAAGGAATCTTAGGAGTTCTGCAGCATATGGATGGCTTAAAGGAAGAAATCAGACATCTGAGATAAGCAGGGCTGTTGTCTAATCTGAGGAATGCATACGAATCCTATAGTAAGTTCACGGGTAATTCTCCGCTTAGTTCAGTAATCTCCTGAAAGTTGGGTGAGCTATTCTGTTTTCCGAGGTACCAACACTTTCAACCACTTTATTTCCGAGGTCCTAAACCTTAAACCAGTTTTTAAACGCGATTAAACGCAGATCAGCGACATCCGTTTTCCAAGGACTAGCGAAGCAACCGTAAATCTGATACTTTGCTATAGTTTGCTACTTTTTCTGGGTATCGAGGAAGTATTCGAAGTCTGCCTTGGTTCAGCACACTATTCCGCGCATCTCCCACTCGCTTACTGGCAGAAGGTCTGCAAGCCTAGCCCCTTCTCTTTATCGAGGGCAACTCATGCTTATAGGGCACTCCCGGGATGGAACCAGCGATAATTACTTCCACTCAAAGGGATCGGATTATGAACCACTCCTAGCTGCTTTCTTTCAAACCTTTCCATCTGAAGTTGATTCTATAGGTGCAGTTGCAGTTCTAGCTCTTTCTTTAGTTGCTGGAGATGTAATACGACTAGCATCAAGCCTTCCTTCTTCAGTAATAGTTCCAGTGGAGGAAGAAGAAGAGCAGATCGCTTTAGACTGCCTCCCTTACTAAACAAGATAGGCTCGCTTCATCTGAGCCGTCGCCCCTTTCAATAGGTGTAGGCATCGGGCCGATTCTCCTTTGCCTATCTTCCTGCTCTGCCAGTATACCTCCTTGCAAACCTCCCTTCCCTTAGCTTTCAATCTGTCTTGTGCCACTCCAGCTTTCACTCAAGCCATTCTTTGAACATACTTTATAGGGGCGACCTTCACTCTTCTTCTCGCTTCCTAACCCTAAAAGCTCACTTCTTTTGGTGTTGCTCCACGATCTTAAAGTGGAACTACGAGATAAATAAGCGGCGGGCTGATCTGACCTGCGCGTCTGCCTTCCTTTCGTCACTACGACTTGGTTTCGAAAGAAGGAATGAGCGCTAGCCTAGCTAACTAGCATACCTTTCCTTGCCTCTTGCTCCGTAAAATGCTATCACATTTTGATTCCAATCATCTCATCTTTGTCCCGTTGAGAAGTTTAGTGGATGAACACTAGAATTGAGTTGCATGAAATACCTGGCAATTCTTGAGATAGGGCTCATCAGACTTTCTTAGTGAGAGTCCCAGTGGTACAGACTATGTCAAAGCTGATCTTTGAAGTACGATCGGAGGAGATACCCGGCAGTGAAAGCTTTCCTCTCCTTTTAGTCGAGTTACGTCAGTACCTCTCGCAATAAATGCTCGAGTTCCCTCTTTTAAAAGAGTAATAAATTACCTTGGACCCTATCCTC.TCTGATAGATGATCTTGCTTGGGCCACTGAAGAAGAAGAATATTGAGGAATTGGACTTAGCATTCTATCTAATGCTTTGATCCATCTAAGCCCATTGACAAGCAGGAAGAGGAGAGGGGGCTTTTGGGATAATTATGATACTGAGCCCAATGGAAAAGCCCACGCCCGAGTCCAAAATGGAATTACTGGGGAAACGAATCCAAGAAAGCCCAAAAACAAAAGTGTGGAGAAGGGGACTTATTGTACTGAAAAAGTGATTGTGCTCATTTACTCTATACGCGTCTTAGTGGACTGACAGAGTGAGCTGGAAAGGTTCCGTCTTTCCGGGGAAATTCAAGAGAGCTAGCTTCGGTGCTCACCAAAGGACGGAGCTGTCGAGTAAGGATTGGCCGAAGTCAGTTACCTGGGAATCAGCCAATAAAAAATAGACAAATAAAAGCGTGATCTGAGTAGGCAGAGCTAAATAGTGCACGTAGGGTAAACGAGGACTCTGGTCAGCTTTGAGCTGTCGAGTAAGGAGTGACGGGCCTTTGGAAACCCGAGAAAAGCGGGGGAGTACTCTATACAGTGCGTTCTATTATTGCCTCTTATTCCCGAGGGAGTGGTCGTAATTAAGCCGCGTGGCAATACCCGCCAAAAAGGACTCTTTGATTTTGAGGGGCGGGGCCTTTATCCAGGGGAGAATTCTTCAGCGCACTAAAATCTAGTTAAGGGGGTTCCATATTCATGAAAAGCCGGGGTTGAACCATGTTACGGAACTAAGACAAGAATTATGACTAATAAGAAAGGGTTTAGGGCCTGCCTATAAATAGAAGCTTCTTTCAGTCTCTATTTGGCAAAGAGGGCACTTAGAAGTCGGCAAGAAAGTGAGTAGACATGGATATCGCGAACAGACTGGCGAGCATTCAACAAGAAATACAAACCGTGGAAAACGAAAAGCTCCAATGTGAGCAAATGCTTGGTCTGTTCTGGGAGCATCCGCCTGCTCTCGATCCGGAGGTCGTGGGCAGAAGGATGCAACTTTTACGGGACCGCATTCGCGGTCTGAAACACAGGATTTCTTTTCTCCTGAAGGAGCAGGAAGGCCTAATAATACAGGCTGTCACCCACGGTCGCCGGGGAGACTAGAATAGAAGAGTCCGCCAACTTCCTATATCGCTAAAATGGAAAATAAGGAGTCCGTCGACCCAAAGTCTTGTATGCTTGCTCTATGTCTTTGGTTTATGTACTATGTTCTTAGTTTCCTTTTTAATGGTGTGTGGCTGGTCTACGGTGTGTGTAGGCTTCCTATTTTATGTATGCTTGTAATGCTTCTGCTTTGTCAAATATTCCTTTGAATATCCGGTCTTCATCTTCCTTAGATTAGATGCTACTTCCTTCGTCTAACGCACTGCCCCACAGATAATCAAAGTCTGTAATAGCGGACGATTCTATCAAACCCTAAAGTAGAAGAAAAAGTAGAAGCTACGAAACCATAAAGCTTCCCTCCTGTTTGAAACAGAAAGCATTGATATCATTGGACACTAAAGGGTCAAACTTTGCTTTGTGCTGTTCACATAGTCGACTGGGAAACGGAAAATCTCATTAATCTTAGTATTACAGACTTTTTACGAAGCGAGAGGAAAAGACGGCAAAGTCTTAACTAAACCCTGAAAGCCTAAAAAAACGAACTTCCTTCAATGCCTTCTCATTAGTATCTGCTGTGTCGCTAAGCATTCTTTCCATCCGCTAATGGACCTCTTGATGCTCGACCAGCCATCAACCGCATCTGACTTTGATCCATAAGTAGATTCAATAGGAGGGTACCATCTCGCTTCTCTTTCCTTGTACGTTCCAGCTCGCTTCGTCTGCTTCAGAGTGGGAAAAGAAGAAGGTAGAAAACCGAGGTGAGCAAAAGGCTCTTTCTTCTTAATACGCTTAGATAGTTCATTGACTTACGCTTAGATTAGATAGTTCATTGACTACGAGACTGGAATCTGATGCTTCTTTATGGTCCGATCCTAAAAGCAAGAGAAGTTTAGGTAGGAGTACGTCGCTTCTTTCTTTTTCATATCTGCTGTCCCAGCTGAGTTCCGCTATCAACTAATTATAGTCGCATAGCAAGCGATGTAATAAATCACTGAGATCTTTTGAATTTCAAGTAAATCATAGATAAAGCATTAAGTAGGAGCGGTAGCTTTCTGCTTCGGTTGGCGCGTTGCAGTAATGAAGAAAAGAATGAGATTGGTTCGGTCTTAAGTCTTTGGGTGAATCAATTTAGGTATCGAAGTTTTAGTTATTGCCATCCCTTGCTTGGCAGCAGTGGGCTTGGTAGTAGCATAGGTGGGTCCTCGGGCAGTTTTTTCAGGGCGTAGGGATCACTGTCTCACTGTGGTACCCGAAAACTTTCTATGCCCACATTTCATAGTTTGAAAGCGCTCTTTAGTGACTTTGTTTGAAAGCGCTCTTTAGTGACTTTCATGTCTTCTGCTACTTTGACTTTAGGAAGATTCAGACAGTCTTTTATGCCCTCTTTTAGGTTTGTTTTTTCCTTCCCCCAATTCTAGGATGCGTAGTAGCTCTAGTAAGTCCGTAGCTGGATCTGGCAGGATGCGGAGTTTGAGCTGCGGGGTGAGGGATGGGATAGACATAGCCATCTCTCCCTTCTCCGGCTCTTCTCTTATGGTCTCTAATGATGGCTTATCCACTACTACTTGCTTCCTTCCCTTTATCCTTCCTCACAACAACTTGCTCCTCTTCCTTATCATCTCTCACAACTGCCTCAATCAGTTTCCCTTTCTTCCCAGGTGCGCTTGATTGGGAAGAAAGATCTGGGGTGGGGAATCTATCAACTTGCAGCAGCCCCAGTCTTCCTTCTCCTTTGAGCACCGGCTTTTAATGGGTATGAAAGAACTAGATGGGAGGCCTTTTCCGGGTAAGAGAAATAGTAGTGAGAGGTAGTGAAAGCCCTTTCGTCCTTTATAACTAGTACATTTTATCGTGTAGATAACAGAGGCAAGCAGGACAGACGATCAATCCCTCTTCTAGTAATGGCACCACTCTTCTTAGGTTAGAACCCATTCCCATTGGCTTCCTACAGGTATAGTGAGATGTACAGGAAGACGGAGACCTTTTGAATTATAGACGACTAGTAGTGCGAAGCAATTCCATCCGATTTTCGAGAAAGAAAAGAGTGAGTTAGCTTATTTTTACGTCGGATGAAAGAGATAATTCTAACTAGCCGGAGACAGAGATATAGAAAGTTTGCAGTGCGGTATCGCCCATGACCTTCTGCGAGAGTGAGATAGAAAGCTGGAAGGTTGGATTGAATCGGATTATCCATTGAGCTAGTCCGTTTTCCTAGTAATGTAAAAAAATAACAAAAGATTCCCGACCAAGTATGATCTTATATAATAATAATTCTAGCATTACTCGCAAGAGTGAGTTCACAATGCGGCTTGTCTGCGAACTTGTGGTGCAAAGATCAAGAAGGTAGAGAGAAAGTCGATGAAAACTGCGGTCACAAGTTCTCACAGAAAGGATCGGAACACAACAGTAGTAGACTTAATAGGACCAACCCACCTCATCAATCTACGTATAACACATCTGAGAGAGTGAAAGGGGTTCCTCCAGGCAGGCTGAAAAGAAAAGGAAAAGGGACAGGTGTACACCAAAGCGCTGCGCTCCTGCTGAAAAGAAATGAAAGGAATTCTTTTCAAAAATGGGATAGACTACTCTGATAGGTCCGATTCCAGTTGGATAGCCAGATGGGTCCCAGTGGAAAAAGTTTCATCCTAGCTCGACTCCAACTCCAACCTCTAGATCTAACTTCTAAAGCTACTAGCTACGTTCAGGGGCGAAGATCCTTAGTGAACTCTTTATTCATTCAATTCAACAAGGCGCTCGGGGGGACGAAAGGAGAGCCAATGGCGAAACCAAAGAGAGAGGCGGCCTGGTGGGGACACCACGATACGATAGGGGATAAGGGCGAAGTTAAGTAAGGGCTCCTCGGATAATCTATATAATCTATCAATAGAAGTCTCTTCACCACATGATGATACCCATGCTCGAAGGGGAACCTTCAAAGCAGGATTTGAGTTCTATAGCTATACAACTCTGGGGAATCGGCGTGCAGGAGCGTACTGCAGAACTATGACCCATACAGTGGAAGCTCTGGTCCC

>Sinapis_LR1-1

TGTGCTTGTGCTGCAGTTTAGAATGCTGATTCCTGGGTGGGTAGTTCCTACTCTTGCTTCCCTTGGTTTTAGCAGGTATTTGTTTATAGCTTCGGTAGTTAACCAACTATTCCCTTTTCAGCACACTCTTTGGCGTGCGATAATAGTAAACTTTTAGGAATCCCACACCAAGTGAACAGAGTTATCGGCTGATACTTTCCTTGTTCCTAGGGTTGAGCAGAAGTTGGTTGACTAGCTACTGAAGTCAGCACACTCCTCTGCTTTTCCGATGCTTTGACCAGCTATTTTCCTAACCAGAGCTAATCCTCTGTGCTGTAATGGAGAAGAAGGAGAACCGAAGATATCAAGCTTGGCTGCGCTGCCCGTCGCATCGGACTCCCAACGGCTAAGAGCGGGAACCATGATTAGCTTAATGCCTTTCGGCTATAGGACATTAGACTTCTACCGGCTACCGGGAAAAAGATTAGACTAGATCAAAGGACTAGATCGATCAGCAGCCGTAGCTGCAGTAGAAAAAGCAGTAGTTGGAGTTGGTACTTCAACCGGTTCTTTTACAGTCCCACCTTCATAAGGAAGAACTGCCTTGAAGGGTAAGGCAGGTCAAAAGAGTGGGCATCTTTACTACCTATGGCTAACTCAAAAAAATCTGAGAGGGGAGGTTGCTCTGCTCTGGATGCACCGGTCAGAACGGGGAAAGCTGCTCTTAGAGCTATCTCTTTCCGATCTAGGCAGATGGTTGAATCTAATGCGAGTAGCACTAGGCCTAGAGCGGAATATTAGGTAGTACGAGTTGCTATATTTTTCCATCCCCCTTCGGGAAGAAACTCTCTTTGACTTTTGAGAAGATAGACCCAAGTAGCCCTTGAATGATCATCCACTATGGTTCAAAAATATCGAAAACCTTCTGTTCTGTGGTTTCAACTGAAAAAGGGCCCCAAATGTCAATGTGAATCAGATCAAAAGGTTCATCACAAATGTTATTATGAGATTTAAAAGGTAAGTGTTTTTGTTTAGCCAAAGGACAGATTTTACAAATGGTCTGATTGACCTTTTTATTCTTATGAGTAGGGAGTCAATCTGAAAGGATAGCAGTTTTAGAAGAAGGATGGAGCAGAAAGATAGAAAGATCAGTTGCTGGAAATCAAATATGTAAATAGTCGAGTTATTGCATTCCTCTCACAAACTATCAATTTCATAAGAGAAGAAAGATCGTTTTTCGAAACTATCAATTTCATAAGAGAAGAAAGATCGTTTTTCGAAACTATCAA....TTTCATAAGAGAAGAAAGATCGTTTTTCGAAAAGAAAGAAGGTTTTGATTCGAGGCGGATCCCTTTTTTCTTTGCCTTTACGAGTAAGAAAGTGGTTACGCTCCACTGGGGAGCCGGAACTGTAAATTCCTACTGTGGTTCGAGTCCACAAACCACTGAGAGCTCTGGCATCGGTTCAGGCTAAATCCTGAAGAAAGCTAGAAAGCGCTGTTTGATGAGCCTGCGTCCGATTTGTGAGTTGGTTAGGTAAAGGCTGACCAAGCCAATGATGCTTAGCTGCCCAGTCGTGCCGAGGAATTCCCATCCGACCAGAGGAGGGAAGAGAGTGACTAAGCAGCAGCTCCACTTGTCGCGTACTTCTTTAGCTGCACCGTCATCGCCGGCCGGACAAACCCTTCCAACAAATGGGGAGTGGGCCAAAGGAACACGACACATCCAGTGAAGAGATCCCGGACAGGGAAGTCAGAAGGTCTGCAAGCCTCGTCTTCGCCCCTGCTTTAGCTGCACTTGGTGCGTAAGAGGGAGACCCGGTCGCTCAGATACAGACAGCAGCTCATTTTACGCTTAAACACATCCCAGGGAATTACAGGAATACGGGCTCCGCCTAGCTACCTGATCCCATCATGAATAGGAATTACCAGCGAACCAAGAGAGATAGATTCAACAGAGGAGAAGGGGTGGCGTGCTTTAGCGACACCTTCAAGACATCCAGGAGTGATCTAGACGAGGTGGGACATGCCGGCTAGAGTACATGCTTCAACTGGAACATCGCTTCGCTACTCTTCCCTCCCTACCCCTACGGTCGTACACTCTGTTGATAGTTCGCCAATGGCTCACAACCAGACAATCATAGTATGTTCGTTCGTTCACTTCGTTCTCTCTCTCCCCTTCTCCCGTTAGCTTGTTCCCCTCCTCCCTTCCCAACCTTCCCAGCCCTTCCTCCAAGAGTAGTTACGCCTTTTCCGTCAGTGGAGAGAGCGAGCAACGACCTGTGAGCGACCGTAGCTCCCTCTGCAAGTGGTAAGGCGCAGTTCACCCCCTATCGAACGGAGGAAGATCGCTGTTGATGTCATGACTAACTTCTTGATTCTTTGATGAGAGAGGCGTGCGTGTGAAATGTCTGATTCATGGCTTGGTTAACGAGATGTCCCAACTGGTACTGGAGCACACCCGTCTGGTTCGTACCATCATTGGCTTGTTCATCCTTTACCTAAGCCTAATCTTCTTCTTCATAGCACACGGAAGTAAAAAAAAGCAGAGAAGGATTAAGACTAACCACTTTTTCGACATCCCTTCATGAAGCGCAGCAACATTTCGGAAGACTGCTAAAAGCGAGAAGTCCTGACCTTCGTTACTAGAGCACAGAAAAAGCAACAGTGTGCTGTACAGAGAACTTGCTTCGATAGGAAAAGAAAAGCTGTATTTCTAAGCTGGGAATGTTGGGTAAGAGTCCGCCTATTACCTCTAAAAAGTGGAGGAGGTGAGACCCCTGTTGGAGTCAACTTTTGAATTTACCGGCTTTGGAGAAACCTTTTCAGTTGCTTAGTGCGAATCCCACGTTTCGAGGGTGGGTAAGGTCTCAGTACCTCGGATATAGCACAGAAAGGCCTATAGCATCCAATACC.ACTTTTCAGGT.TACTTCCTTGTGAGCTTGTCAGACAAAGTAGGCGACGGTGTGCTGCACTACATCTCCTCAGCAGTTGATCGGTCAGGTTCCTTGCCTTGCTTAACCCAGCTCGAGTATTATTCGAAACGAGGAATATCCTTACTCTAGAAGCTCAGAGTTAAGAGTTAAGGGAAGGTGTTAGCTAAGGAATTAGGTCTTCCTCTTCGAAAGGAGAACTCTAGTCTACCGTGGTGGGTAGTAGCTACTCCCAGTACATCTATCATCCGTGACATCCATGGCAACTACTACTTTTCATTGCTGTGCTGTTTAATCGATCGAACAAAACTCCTAAGGTAGAGATCTTAAGAAGAGGACGAGCTCAACTCCCGATTGTTCAAGCTTAGATACCTCTTTGATTTGGGATTGACGAAACAGTATAAACCTTTATAATAGGCCTATTTTGTGCGTTTAATCACCTTTCTTTCATCTCTGAGCCAGCTATCCTTTCAGAATAGGGCTTTCCGCTTTCTTTTAAGGTGAGGAATCTTAGGAGTTCAGCTTTTTCGATTAAACGAAGAATTCTGTCATTTCAGATGGGATTCCAAAGCAAGGCTAGTTATCTATGTTAGCTTCATTCCTGTGAAGTTGGTTTCTAGTTTTTATCTTTGAGTTGGCAGTAACATGACTAGCAGCATAGTACGCACACACGAAAGTCAAGGGATTGTCTGGCCCTGCTACCTACCCAACATGAGCACACTCCGAAATTAGAGTAGCTATCTATTTCATAAGAGACCTCTTGCAGATTGAAGCATGATTGGGCTCTCCGCTTCTCTTCAGATGGAACTTCGCCATGTC......CCTCGAGTACTGTTCCTAGAGTATAGTAGAGTACGGATCGATTGAACTGGTTTTTGTCGTACCCCTAACGGTACAGTTATGACCTAATGCGGGGTCTCTCTCAGGCAGAAGATCAACCGATGTACGATGTTGGACCTAATGAGAGGTCCTTCTCTGTCAGGGTTTATAGGTCAACTGGTTGCTTCGCTAGAGTAGGACCTAACCCATGTACTGTGAGTGTTGATTAGTCACCCTGATATCGAGTGAGCATTCGGGGGTGTAGACTTCACACTTTAACAGGTCATCTGTCTTTCGAAGTTTTCTGTAACACAGAGATGTAGTTGCAAGGCAAAGGTCAACTAGCTTGCTTCGCTAGGTTGCTTCGCTAGGGACTTAAGGAGAAGTTATTTTCTGTAGCACAGAGATGACTTTAGTAAGTTGCAAGGCGAAGGCCTCAACGATTGTGGTTAATCTATCTTGGTATCTTTGTGATGAGGTATGGCTTATCTGTGCTGGGGTGTGCTTGGGAGTCAAATGCTAGGGTCATGCGAAAAGTCCTATTTCCAATTCCGATCTCATATCTAAGGAACGGGAGTTCTTAACAGAAGAAAGGCCATAGACTCCGTTTGGTACGTATCTGATATGTGACAAATCCTAAATCTGCAAGGTATCTTATCTCTCTCAGTTATTAATATGGTGCTGGACTAGCGAAGCAACCCTTTTGAAGAAGGAATCTTAGGAGTTCTGCAGCATATGGATGGCTTAAAGGAAGAAATCAGACATCTGAGATAAGCAGGGCTGTTGTCTAATCTGAGGAATGCATACGAATCCTATAGTAAGTTCACGGGTAATTCTCCGCTTAGTTCAGTAATCTCCTGAAAGTTGGGTGAGCTATTCTGTTTTCCGAGGTACCAACACTTTCAACCACTTTATTTCCGAGGTCCTAAACCTTAAACCAGTTTTTAAACGCGATTAAACGCAGATCAGCGACATCCGTTTTCCAAGGACTAGCGAAGCAACCGTAAATCTGATACTTTGCTATAGTTTGCTACTTTTTCTGGGTATCGAGGAAGTATTCGAAGTCTGCCTTGGTTCAGCACACTATTCCGCGCATCTCCCACTCGCTTACTGGCAGAAGGTCTGCAAGCCTAGCCCCTTCTCTTTATCGAGGGCAACTCATGCTTATAGGGCACTCCCGGGATGGAACCAGCGATAATTACTTCCACTCAAAGGGATCGGATTATGAACCACTCCTAGCTGCTTTCTTTCAAACCTTTCCATCTGAAGTTGATTCTATAGGTGCAGTTGCAGTTCTAGCTCTTTCTTTAGTTGCTGGAGATGTAATACGACTAGCATCAAGCCTTCCTTCTTCAGTAATAGTTCCAGTGGAGGAAGAAGAAGAGCAGATCGCTTTAGACTGCCTCCCTTACTAAACAAGATAGGCTCGCTTCATCTGAGCCGTCGCCCCTTTCAATAGGTGTAGGCATCGGGCCGATTCTCCTTTGCCTATCTTCCTGCTCTGCCAGTATACCTCCTTGCAAACCTCCCTTCCCTTAGCTTTCAATCTGTCTTGTGCCACTCCAGCTTTCACTCAAGCCATTCTTTGAACATACTTTATAGGGGCGACCTTCACTCTTCTTCTCGCTTCCTAACCCTAAAAGCTCACTTCTTTTGGTGTTGCTCCACGATCTTAAAGTGGAACTACGAGATAAATAAGCGGCGGGCTGATCTGACCTGCGCGTCTGCCTTCCTTTCGTCACTACGACTTGGTTTCGAAAGAAGGAATGAGCGCTAGCCTAGCTAACTAGCATACCTTTCCTTGCCTCTTGCTCCGTAAAATGCTATCACATTTTGATTCCAATCATCTCATCTTTGTCCCGTTGAGAAGTTTAGTGGATGAACACTAGAATTGAGTTGCATGAAATACCTGGCAATTCTTGAGATAGGGCTCATCAGACTTTCTTAGTGAGAGTCCCAGTGGTACAGACTATGTCAAAGCTGATCTTTGAAGTACGATCGGAGGAGATACCCGGCAGTGAAAGCTTTCCTCTCCTTTTAGTCGAGTTACGTCAGTACCTCTCGCAATAAATGCTCGAGTTCCCTCTTTTAAAAGAGTAATCAATTACCTTGGACCCTATCCTCTCTGATAGATGATCTTGCTTGGGCCACTGAAGAAGAAGAATATTGAGGAATTGGACTTAGCATTCTATCTAATGCTTTGATCCATCTAAGCCCATTGACAAGCAGGAAGAGGAGAGGGGGCTTTTGGGATAATTATGATACTGAGCCCAATGGAAAAGCCCACGCCCGAGTCCAAAATGGAATTACTGGGGAAACGAATCCAAGAAAGCCCAAAAACAAAAGTGTGGAGAAGGGGACTTATTGTACTGAAAAAGTTATTGTGCTCATTTACTCTATACGCGTCTTAGTGGACTGACAGAGTGAGCTGGAAAGGTTCCGTCTTTCCGGGGAAATTCAAGAGAGCTAGCTTCGGTGCTCACCAAAGGACGGAGCTGTCGAGTAAGGATTGGCCGAAGTCAGTTACCTGGGAATCAGCCAATAAAAAATAGACAAATAAAAGCGTGATCTGAGTAGGCAGAGCTAAATAGTGCACGTAGGGTAAACGAGGACTCTGGTCAGCTTTGAGCTGTCGAGTAAGGAGTGACGGGCCTTTGGAAACCCGAGAAAAGCGGGGGAGTACTCTATACAGTGCGTTCTATTATTGCCTCTTATTCCCGAGGGAGTGGTCGTAATTAAGCCGCGTGGCAATACCCGCCAAAAAGGACTCTTTGATTTTGAGGGGCGGGGCCTTTATCCAGGGGAGAATTCTTCAGCGCACTAAAATCTAGTTAAGGGGGTTCCATATTCATGAAAAGCCGGGGTTGAACCATGTTACGGAACTAAGACAAGAATTATGACTAATAAGAAAGGGTTTAGGGCCTGCCTATAAATAGAAGCTTCTTTCAGTCTCTATTTGGCAAAGAGGGCACTTAGAAGTCGGCAAGAAAGTGAGTAGACATGGATATCGCGAACAGACTGGCGAGCATTCAACAAGAAATACAAACCGTGGAAAACGAAAAGCTCCAATGTGAGCAAATGCTTGGTCTGTTCTGGGAGCATCCGCCTGCTCTCGATCCGGAGGTCGTGGGCAGAAGGATGCAACTTTTACGGGACCGCATTCGCGGTCTGAAACACAGGATTTCTTTTCTCCTGAAGGAGCAGGAAGGCCTAATAATACAGGCTGTCACCCACGGTCGCCGGGGAGACTAGAATAGAAGAGTCCGTCGACTCTTTCTTTCGATAAGATTGAAATAAGGAGTCCGTCGACCCAAAGTAATGTGTTTTAATGCATGGCTTTCTTTGTTATCTTTCATGTTGCTCTATGTCTTTGGTTTATGTACTATGTTCTTAGTTTCCTTTTTAATGGTGTGTGGCTGGTCTACGGTGTGTGTAGGCTTCCTATTTTATGTATGCTTGTAATGCTTCTGCTTTGTCAAATATTCCTTTGAATATCCGGTCTTCATCTTCCTTAGATTAGATGCTACTTCCTTCGTCTAACGCACTGCCCCACAGATAATCAAAGTCTGTAATAGCGGACGATTCTATCAAACCCTAAAGTAGAAGAAAAAGTAGAAGCTACGAAACCATAAAGCTTCCCTCCTGTTTGAAACAGAAAGCATTGATATCATTGGACACTAAAGGGTCAAACTTTGCTTTGTGCTGTTCACATAGTCGACTGGGAAACGGAAAATCTCATTAATCTTAGTATTACAGACTTTTTACGAAGCGAGAGGAAAAGACGGCAAAGTCTTAACTAAACTATTCCGACTGAATATGAGCCTAAAAAAAATGCGAACTTCCTTCAATGCCTTCTCATTAGTATCTGCTGTGTCGCTAAGCATTCTTTCCATCCGCTAATGGACCTAT.CTCGACGGAATCGGCGTGCAGGAGCGTACTGCAGAACTATGACCCATACAGTGGAAGCTCTGGTCCC......................................................................................................................................................................................................................................................................................................................................................................................................................................................................................................................................................................................................................................................................................................................................................................................................................................................................................................................................................................................................................................................................................................................................................................................................................................................................................................................................................................................................................................................................................................................................................................................................................................................................................................................................................................................................................................................................................................................................................................................................................................................................................................................................................................................................................................................................................................................................................................................................................................................................................................................................................................................................................................................................................................................................................................................................................................................................................................................................................................................................................................................................................................................................................................................................................................................................................................................

>Sinapis_LR1-2

TGTGCTTGTGCTGCAGTTTAGAATGCTGATTCCTGGGTGGGTAGTTCCTACTCTTGCTTCCCTTGGTTTTAGCAGGTATTTGTTTATAGCTTCGGTAGTTAACCAACTATTCCCTTTTCAGCACACTCTTTGGCGTGCGATAATAGTAAACTTTTAGGAATCCCACACCAAGTGAACAGAGTTATCGGCTGATACTTTCCTTGTTCCTAGGGTTGAGCAGAAGTTGGTTGACTAGCTACTGAAGTCAGCACACTCCTCTGCTTTTCCGATGCTTTGACCAGCTATTTTCCTAACCAGAGCTAATCCTCTGTGCTGTAATGGAGAAGAAGGAGAACCGAAGATATCAAGCTTGGCTGCGCTGCCCGTCGCATCGGACTCCCAACGGCTAAGAGCGGGAACCATGATTAGCTTAATGCCTTTCGGCTATAGGACATTAGACTTCTACCGGCTACCGGGAAAAAGATTAGACTAGATCAAAGGACTAGATCGATCAGCAGCCGTAGCTGCAGTAGAAAAAGCAGTAGTTGGAGTTGGTACTTCAACCGGTTCTTTTACAGTCCCACCTTCATAAGGAAGAACTGCCTTGAAGGGTAAGGCAGGTCAAAAGAGTGGGCATCTTTACTACCTATGGCTAACTCAAAAAAATCTGAGAGGGGAGGTTGCTCTGCTCTGGATGCACCGGTCAGAACGGGGAAAGCTGCTCTTAGAGCTATCTCTTTCCGATCTAGGCAGATGGTTGAATCTAATGCGAGTAGCACTAGGCCTAGAGCGGAATATTAGGTAGTACGAGTTGCTATATTTTTCCATCCCCCTTCGGGAAGAAACTCTCTTTGACTTTTGAGAAGATAGACCCAAGTAGCCCTTGAATGATCATCCACTATGGTTCAAAAATATCGAAAACCTTCTGTTCTGTGGTTTCAACTGAAAAAGGGCCCCAAATGTCAATGTGAATCAGATCAAAAGGTTCATCACAAATGTTATTATGAGATTTAAAAGGTAAGTGTTTTTGTTTAGCCAAAGGACAGATTTTACAAATGGTCTGATTGACCTTTTTATTCTTATGAGTAGGGAGTCAATCTGAAAGGATAGCAGTTTTAGAAGAAGGATGGAGCAGAAAGATAGAAAGATCAGTTGCTGGAAATCAAATATGTAAATAGTCGAGTTATTGCATTCCTCTCACAAACTATCAATTTCATAAGAGAAGAAAGATCGTTTTTCGAAACTATCAATTTCATAAGAGAAGAAAGATCGTTTTTCGAAACTATCAA....TTTCATAAGAGAAGAAAGATCGTTTTTCGAAAAGAAAGAAGGTTTTGATTCGAGGCGGATCCCTTTTTTCTTTGCCTTTACGAGTAAGAAAGTGGTTACGCTCCACTGGGGAGCCGGAACTGTAAATTCCTACTGTGGTTCGAGTCCACAAACCACTGAGAGCTCTGGCATCGGTTCAGGCTAAATCCTGAAGAAAGCTAGAAAGCGCTGTTTGATGAGCCTGCGTCCGATTTGTGAGTTGGTTAGGTAAAGGCTGACCAAGCCAATGATGCTTAGCTGCCCAGTCGTGCCGAGGAATTCCCATCCGACCAGAGGAGGGAAGAGAGTGACTAAGCAGCAGCTCCACTTGTCGCGTACTTCTTTAGCTGCACCGTCATCGCCGGCCGGACAAACCCTTCCAACAAATGGGGAGTGGGCCAAAGGAACACGACACATCCAGTGAAGAGATCCCGGACAGGGAAGTCAGAAGGTCTGCAAGCCTCGTCTTCGCCCCTGCTTTAGCTGCACTTGGTGCGTAAGAGGGAGACCCGGTCGCTCAGATACAGACAGCAGCTCATTTTACGCTTAAACACATCCCAGGGAATTACAGGAATACGGGCTCCGCCTAGCTACCTGATCCCATCATGAATAGGAATTACCAGCGAACCAAGAGAGATAGATTCAACAGAGGAGAAGGGGTGGCGTGCTTTAGCGACACCTTCAAGACATCCAGGAGTGATCTAGACGAGGTGGGACATGCCGGCTAGAGTACATGCTTCAACTGGAACATCGCTTCGCTACTCTTCCCTCCCTACCCCTACGGTCGTACACTCTGTTGATAGTTCGCCAATGGCTCACAACCAGACAATCATAGTATGTTCGTTCGTTCACTTCGTTCTCTCTCTCCCCTTCTCCCGTTAGCTTGTTCCCCTCCTCCCTTCCCAACCTTCCCAGCCCTTCCTCCAAGAGTAGTTACGCCTTTTCCGTCAGTGGAGAGAGCGAGCAACGACCTGTGAGCGACCGTAGCTCCCTCTGCAAGTGGTAAGGCGCAGTTCACCCCCTATCGAACGGAGGAAGATCGCTGTTGATGTCATGACTAACTTCTTGATTCTTTGATGAGAGAGGCGTGCGTGTGAAATGTCTGATTCATGGCTTGGTTAACGAGATGTCCCAACTGGTACTGGAGCACACCCGTCTGGTTCGTACCATCATTGGCTTGTTCATCCTTTACCTAAGCCTAATCTTCTTCTTCATAGCACACGGAAGTAAAAAAAAGCAGAGAAGGATTAAGACTAACCACTTTTTCGACATCCCTTCATGAAGCGCAGCAACATTTCGGAAGACTGCTAAAAGCGAGAAGTCCTGACCTTCGTTACTAGAGCACAGAAAAAGCAACAGTGTGCTGTACAGAGAACTTGCTTCGATAGGAAAAGAAAAGCTGTATTTCTAAGCTGGGAATGTTGGGTAAGAGTCCGCCTATTACCTCTAAAAAGTGGAGGAGGTGAGACCCCTGTTGGAGTCAACTTTTGAATTTACCGGCTTTGGAGAAACCTTTTCAGTTGCTTAGTGCGAATCCCACGTTTCGAGGGTGGGTAAGGTCTCAGTACCTCGGATATAGCACAGAAAGGCCTATAGCATCCAATACC.ACTTTTCAGGT.TACTTCCTTGTGAGCTTGTCAGACAAAGTAGGCGACGGTGTGCTGCACTACATCTCCTCAGCAGTTGATCGGTCAGGTTCCTTGCCTTGCTTAACCCAGCTCGAGTATTATTCGAAACGAGGAATATCCTTACTCTAGAAGCTCAGAGTTAAGAGTTAAGGGAAGGTGTTAGCTAAGGAATTAGGTCTTCCTCTTCGAAAGGAGAACTCTAGTCTACCGTGGTGGGTAGTAGCTACTCCCAGTACATCTATCATCCGTGACATCCATGGCAACTACTACTTTTCATTGCTGTGCTGTTTAATCGATCGAACAAAACTCCTAAGGTAGAGATCTTAAGAAGAGGACGAGCTCAACTCCCGATTGTTCAAGCTTAGATACCTCTTTGATTTGGGATTGACGAAACAGTATAAACCTTTATAATAGGCCTATTTTGTGCGTTTAATCACCTTTCTTTCATCTCTGAGCCAGCTATCCTTTCAGAATAGGGCTTTCCGCTTTCTTTTAAGGTGAGGAATCTTAGGAGTTCAGCTTTTTCGATTAAACGAAGAATTCTGTCATTTCAGATGGGATTCCAAAGCAAGGCTAGTTATCTATGTTAGCTTCATTCCTGTGAAGTTGGTTTCTAGTTTTTATCTTTGAGTTGGCAGTAACATGACTAGCAGCATAGTACGCACACACGAAAGTCAAGGGATTGTCTGGCCCTGCTACCTACCCAACATGAGCACACTCCGAAATTAGAGTAGCTATCTATTTCATAAGAGACCTCTTGCAGATTGAAGCATGATTGGGCTCTCCGCTTCTCTTCAGATGGAACTTCGCCATGTC......CCTCGAGTACTGTTCCTAGAGTATAGTAGAGTACGGATCGATTGAACTGGTTTTTGTCGTACCCCTAACGGTACAGTTATGACCTAATGCGGGGTCTCTCTCAGGCAGAAGATCAACCGATGTACGATGTTGGACCTAATGAGAGGTCCTTCTCTGTCAGGGTTTATAGGTCAACTGGTTGCTTCGCTAGAGTAGGACCTAACCCATGTACTGTGAGTGTTGATTAGTCACCCTGATATCGAGTGAGCATTCGGGGGTGTAGACTTCACACTTTAACAGGTCATCTGTCTTTCGAAGTTTTCTGTAACACAGAGATGTAGTTGCAAGGCAAAGGTCAACTAGCTTGCTTCGCTAGGTTGCTTCGCTAGGGACTTAAGGAGAAGTTATTTTCTGTAGCACAGAGATGACTTTAGTAAGTTGCAAGGCGAAGGCCTCAACGATTGTGGTTAATCTATCTTGGTATCTTTGTGATGAGGTATGGCTTATCTGTGCTGGGGTGTGCTTGGGAGTCAAATGCTAGGGTCATGCGAAAAGTCCTATTTCCAATTCCGATCTCATATCTAAGGAACGGGAGTTCTTAACAGAAGAAAGGCCATAGACTCCGTTTGGTACGTATCTGATATGTGACAAATCCTAAATCTGCAAGGTATCTTATCTCTCTCAGTTATTAATATGGTGCTGGACTAGCGAAGCAACCCTTTTGAAGAAGGAATCTTAGGAGTTCTGCAGCATATGGATGGCTTAAAGGAAGAAATCAGACATCTGAGATAAGCAGGGCTGTTGTCTAATCTGAGGAATGCATACGAATCCTATAGTAAGTTCACGGGTAATTCTCCGCTTAGTTCAGTAATCTCCTGAAAGTTGGGTGAGCTATTCTGTTTTCCGAGGTACCAACACTTTCAACCACTTTATTTCCGAGGTCCTAAACCTTAAACCAGTTTTTAAACGCGATTAAACGCAGATCAGCGACATCCGTTTTCCAAGGACTAGCGAAGCAACCGTAAATCTGATACTTTGCTATAGTTTGCTACTTTTTCTGGGTATCGAGGAAGTATTCGAAGTCTGCCTTGGTTCAGCACACTATTCCGCGCATCTCCCACTCGCTTACTGGCAGAAGGTCTGCAAGCCTAGCCCCTTCTCTTTATCGAGGGCAACTCATGCTTATAGGGCACTCCCGGGATGGAACCAGCGATAATTACTTCCACTCAAAGGGATCGGATTATGAACCACTCCTAGCTGCTTTCTTTCAAACCTTTCCATCTGAAGTTGATTCTATAGGTGCAGTTGCAGTTCTAGCTCTTTCTTTAGTTGCTGGAGATGTAATACGACTAGCATCAAGCCTTCCTTCTTCAGTAATAGTTCCAGTGGAGGAAGAAGAAGAGCAGATCGCTTTAGACTGCCTCCCTTACTAAACAAGATAGGCTCGCTTCATCTGAGCCGTCGCCCCTTTCAATAGGTGTAGGCATCGGGCCGATTCTCCTTTGCCTATCTTCCTGCTCTGCCAGTATACCTCCTTGCAAACCTCCCTTCCCTTAGCTTTCAATCTGTCTTGTGCCACTCCAGCTTTCACTCAAGCCATTCTTTGAACATACTTTATAGGGGCGACCTTCACTCTTCTTCTCGCTTCCTAACCCTAAAAGCTCACTTCTTTTGGTGTTGCTCCACGATCTTAAAGTGGAACTACGAGATAAATAAGCGGCGGGCTGATCTGACCTGCGCGTCTGCCTTCCTTTCGTCACTACGACTTGGTTTCGAAAGAAGGAATGAGCGCTAGCCTAGCTAACTAGCATACCTTTCCTTGCCTCTTGCTCCGTAAAATGCTATCACATTTTGATTCCAATCATCTCATCTTTGTCCCGTTGAGAAGTTTAGTGGATGAACACTAGAATTGAGTTGCATGAAATACCTGGCAATTCTTGAGATAGGGCTCATCAGACTTTCTTAGTGAGAGTCCCAGTGGTACAGACTATGTCAAAGCTGATCTTTGAAGTACGATCGGAGGAGATACCCGGCAGTGAAAGCTTTCCTCTCCTTTTAGTCGAGTTACGTCAGTACCTCTCGCAATAAATGCTCGAGTTCCCTCTTTTAAAAGAGTAATCAATTACCTTGGACCCTATCCTCTCTGATAGATGATCTTGCTTGGGCCACTGAAGAAGAAGAATATTGAGGAATTGGACTTAGCATTCTATCTAATGCTTTGATCCATCTAAGCCCATTGACAAGCAGGAAGAGGAGAGGGGGCTTTTGGGATAATTATGATACTGAGCCCAATGGAAAAGCCCACGCCCGAGTCCAAAATGGAATTACTGGGGAAACGAATCCAAGAAAGCCCAAAAACAAAAGTGTGGAGAAGGGGACTTATTGTACTGAAAAAGTTATTGTGCTCATTTACTCTATACGCGTCTTAGTGGACTGACAGAGTGAGCTGGAAAGGTTCCGTCTTTCCGGGGAAATTCAAGAGAGCTAGCTTCGGTGCTCACCAAAGGACGGAGCTGTCGAGTAAGGATTGGCCGAAGTCAGTTACCTGGGAATCAGCCAATAAAAAATAGACAAATAAAAGCGTGATCTGAGTAGGCAGAGCTAAATAGTGCACGTAGGGTAAACGAGGACTCTGGTCAGCTTTGAGCTGTCGAGTAAGGAGTGACGGGCCTTTGGAAACCCGAGAAAAGCGGGGGAGTACTCTATACAGTGCGTTCTATTATTGCCTCTTATTCCCGAGGGAGTGGTCGTAATTAAGCCGCGTGGCAATACCCGCCAAAAAGGACTCTTTGATTTTGAGGGGCGGGGCCTTTATCCAGGGGAGAATTCTTCAGCGCACTAAAATCTAGTTAAGGGGGTTCCATATTCATGAAAAGCCGGGGTTGAACCATGTTACGGAACTAAGACAAGAATTATGACTAATAAGAAAGGGTTTAGGGCCTGCCTATAAATAGAAGCTTCTTTCAGTCTCTATTTGGCAAAGAGGGCACTTAGAAGTCGGCAAGAAAGTGAGTAGACATGGATATCGCGAACAGACTGGCGAGCATTCAACAAGAAATACAAACCGTGGAAAACGAAAAGCTCCAATGTGAGCAAATGCTTGGTCTGTTCTGGGAGCATCCGCCTGCTCTCGATCCGGAGGTCGTGGGCAGAAGGATGCAACTTTTACGGGACCGCATTCGCGGTCTGAAACACAGGATTTCTTTTCTCCTGAAGGAGCAGGAAGGCCTAATAATACAGGCTGTCACCCACGGTCGCCGGGGAGACTAGAATAGAAGAGTCCGTCGACTCTTTCTTTCGATAAGATTGAAATAAGGAGTCCGTCGACCCAAAGTAATGTGTTTTAATGCATGGCTTTCTTTGTTATCTTTCATGTTGCTCTATGTCTTTGGTTTATGTACTATGTTCTTAGTTTCCTTTTTAATGGTGTGTGGCTGGTCTACGGTGTGTGTAGGCTTCCTATTTTATGTATGCTTGTAATGCTTCTGCTTTGTCAAATATTCCTTTGAATATCCGGTCTTCATCTTCCTTAGATTAGATGCTACTTCCTTCGTCTAACGCACTGCCCCACAGATAATCAAAGTCTGTAATAGCGGACGATTCTATCAAACCCTAAAGTAGAAGAAAAAGTAGAAGCTACGAAACCATAAAGCTTCCCTCCTGTTTGAAACAGAAAGCATTGATATCATTGGACACTAAAGGGTCAAACTTTGCTTTGTGCTGTTCACATAGTCGACTGGGAAACGGAAAATCTCATTAATCTTAGTATTACAGACTTTTTACGAAGCGAGAGGAAAAGACGGCAAAGTCTTAACTAAACTATTCCGACTGAATATGAGCCTAAAAAAAATGCGAACTTCCTTCAATGCCTTCTCATTAGTATCTGCTGTGTCGCTAAGCATTCTTTCCATCCGCTAATGGACCTAT.CTCGACGGAATCGGCGTGCAGGAGCGTACTGCAGAACTATGACCCATACAGTGGAAGCTCTGGTCCC......................................................................................................................................................................................................................................................................................................................................................................................................................................................................................................................................................................................................................................................................................................................................................................................................................................................................................................................................................................................................................................................................................................................................................................................................................................................................................................................................................................................................................................................................................................................................................................................................................................................................................................................................................................................................................................................................................................................................................................................................................................................................................................................................................................................................................................................................................................................................................................................................................................................................................................................................................................................................................................................................................................................................................................................................................................................................................................................................................................................................................................................................................................................................................................................................................................................................................................................

>B._nigra_LR1-1

..............................................................................................................................................................................................................................................................................................................................................................................................................................................................................................................................................................................................................................................................................................................................................................................................................................................................................................................................................................................................................................................................................................................................................................................AGAAGAAGGATGGAGCAGAAAGATAGAAAGATCAGTTGCTGGAAATCAAATATGTAAATAGTCGAGTTATTGCATTCCTCTTCACAAACTATCAATTTCATAAGAGAAGAAAGATCGTTTTTCGAAACTATCAA....TTTCATAAGAGAAGAAAGATCGTTTTTAGAAAAGAAAGAAGGTTTTGATTCGAGGCGGATCCCTTTTTTCTTTGCCTTTACGAGTAAGAAAGTGGTTACGCTCCGCTGGGGAGCCGGAACTGTAAATTCCTACTGTGGTTCGAGTCCACAAACCACTGAGAGCTCTGGCATCGGTTCAGGCTAAATCCTGAAGAAAGCTAGAAAGCGCTGTTTGATGAGCCTGCGTCCGATTTGTGAGTTGGTTAGGTAAAGGCTGACCAAGCCAATGATGCTTAGCTGCCCAGTCGTGCCGAGGAATTCCCATCCGACCAGAGGAGGGAAGAGAGTGACTAAGCAGCAGCTCCACTTGTCGCGTACTTCTTTAGCTGCACCGTCATCGCCGGCCGGACAAACCCTTCCAACAAATGGGGAGTGGGCCAAAGGAACACGACACATCCAGTGAAGAGATCCCGGACAGGGAAGTCAGAAGGTCTGCAAGCCTCGTCTTCGCCCCTGCTTTAGCTGCACTTGGTGCGTAAGAGGGAGACCCGGTCGCTCAGATACAGACAGCAGCTCATTTTACGCTTAAACACATCCCAGGGAATTACAGGAATACGGGCTCCGCCTAGCTACCTGATCCCATCATGAATAGGAATTACCAGCGAACCAAGAGAGATAGATTCAACAGAGGAGAAGGGGTGGCGTGCTTTAGCGACACCTTCAAGACATCCAGGAGTGATCTAGACGAGGTGGGACATGCCGGCTAGAGTACATGCTTCAACTGGAACATCGCTTCGCTACTCTTCCCTCCCTACCCCTACGGTCGTACACTCTGTTGATAGTTCGCCAATGGCTCACAACCAGACAATCATAGTATGTTCGTTCGTTCACTTCGTTCTCTCTCTCCCCTTCTCCCGTTAGCTTGTTCCCCTCCTCCCTTCCCAACCTTCCCAGCCCTTCCTCCAAGAGTAGTTACGCCTTTTCCGTCAGTGGAGAGAGCGAGCAACGACCTGTGAGCGACCGTAGCTCCCTCTGCAAGTGGTAAGGCGCAGTTCACCCCCTATCGAACGGAGGAAGATCGCTGTTGATGTCATGACTAACTTCTTGATTCTTTGATGAGAGAGGCGTGCGTGTGAAATGTCTGATTCATGGCTTGGTTAACGAGATGTCCCAACTGGTACTGGAGCACACCCGTCTGGTTCGTACCATCATTGGCTTGTTCATCCTTTACCTAAGCCTAATCTTCTTCTTCATAGCACACGGAAGTAAAAAAAAGCAGAGAAGGATTAAGACTAACCACTTTTTCGACATCCCTTCATGAAGCGCAGCAACATTTCGGAAGACTGCTAAAAGCGAGAAGTCCTGACCTTCGTTACTAGAGCACAGAAAAAGCAACAGTGTGCTGTACAGAGAACTTGCTTCGATAGGAAAAGAAAAGCTGTATTTCTAAGCTGGGAATGTTGGGTAAGAGTCCGCCTATTACCTCTAAAAAGTGGAGGAGGTGAGACCCCTGTTGGAGTCAACTTTTGAATTTACCGGCTTTGGAGAAACCTTTTCAGTTGCTTAGTGCGAATCCCACGTTTCGAGGGTGGGTAAGGTCTCAGTACCTCGGATATAGCACAGAAAGGCCTATAGCATCCAATACC.ACTTTTCAGGT.TACTTCCTTGTGAGCTTGTCAGACAAAGTAGGCGACGGTGTGCTGCACTACATCTCCTCAGCAGTTGATCGGTCAGGTTCCTTGCCTTGCTTAACCCAGCTCGAGTATTATTCGAAACGAGGAATATCCTTACTCTAGAAGCTCAGAGTTAAGAGTTAAGGGAAGGTGTTAGCTAAGGAATTAGGTCTTCCTCTTCGAAAGGAGAACTCTAGTCTACCGTGGTGGGTAGTAGCTACTCCCAGTACATCTATCATCCGTGACATCCATGGCAACTACTACTTTTCATTGCTGTGCTGTTTAATCGATCGAACAAAACTCCTAAGGTAGAGATCTTAAGAAGAGGACGAGCTCAACTCCCGATTGTTCAAGCTTAGATACCTCTTTGATTTGGGATTGACGAAACAGTATAAACCTTTATAATAGGCCTATTTTGTGCGTTTAATCACCTTTCTTTCATCTCTGAGCCAGCTATCCTTTCAGAATAGGGCTTTCCGCTTTCTTTTAAGGTGAGGAATCTTAGGAGTTCAGCTTTTTCGATTAAACGAAGAATTCTGTCATTTCAGATGGGATTCCAAAGCAAGGCTAGTTATCTATGTTAGCTTCATTCCTGTGAAGTTGGTTTCTAGTTTTTATCTTTGAGTTGGCAGTAACATGACTAGCAGCATAGTACGCACACACGAAAGTCAAGGGATTGTCTGGCCCTGCTACCTACCCAACATGAGCACACTCCGAAATTAGAGTAGCTATCTATTTCATAAGAGACCTCTTGCAGATTGAAGCATGATTGGGCTCTCCGCTTCTCTTCAGATGGAACTTCGCCATGTCCATGTCCCTCGAGTACTGTTCCTAGAGTATAGTAGAGTACGGATCGATTGAACTGGTTTCTGTCGTACCCCTAACGGTACAGTTATGACCTAATGCGGGGTCTCTCTCAGGCAGAAGATCAACCGATGTACGATGTTGGACCTAATGAGAGGTCCTTCTCTGTCAGGGTTTATAGGTCAACTGGTTGCTTCGCTAGAGTAGGACCTAACCCATGTACTGTGAGTGTTGATTAGTCACCCTGATATCGAGTGAGCATTCGGGGGTGTAGACTTCACACTTTAACAGGTCATCTGTCTTTCGAAGTTTTCTGTAACACAGAGATGTAGTTGCAAGGCAAAGGTCAACTAGCTTGCTTCGCTAGGTTGCTTCGCTAGGGACTTAAGGAGAAGTTATTTTCTGTAGCACAGAGATGACTTTAGTAAGTTGCAAGGCGAAGGCCTCAACGATTGTGGTTAATCTATCTTGGTATCTTTGTGATGAGGTATGGCTTATCTGTGCTGGGGTGTGCTTGGGAGTCAAATGCTAGGGTCATGCGAAAAGTCCTATTTCCAATTCCGATCTCATATCTAAGGAACGGGAGTTCTTAACAGAAGAAAGGCCATAGACTCCGTTTGGTACGTATCTGATATGTGACAAATCCTAAATCTGCAAGGTATCTTATCTCTCTCAGTTATTAATATGGTGCTGGACTAGCGAAGCAACCCTTTTGAAGAAGGAATCTTAGGAGTTCTGCAGCATATGGATGGCTTAAAGGAAGAAATCAGACATCTGAGATAAGCAGGGCTGTTGTCTAATCTGAGGAATGCATACGAATCCTATAGTAAGTTCACGGGTAATTCTCCGCTTAGTTCAGTAATCTCCTGAAAGTTGGGTGAGCTATTCTGTTTTCCGAGGTACCAACACTTTCAACCACTTTATTTCCGAGGTCCTAAACCTTAAACCAGTTTTTAAACGCGATTAAACGCAGATCAGCGACATCCGTTTTCCAAGGACTAGCGAAGCAACCGTAAATCTGATACTTTGCTATAGTTTGCTACTTTTTCTGGGTATCGAGGAAGTATTCGAAGTCTGCCTTGGTTCAGCACACTATTCCGCGCATCTCCCACTCGCTTACTGGCAGAAGGTCTGCAAGCCTAGCCCCTTCTCTTTATCGAGGGCAACTCATGCTTATAGGGCACTCCCGGGATGGAACCAGCGATAATTACTTCCACTCAAAGGGATCGGATTATGAACCACTCCTAGCTGCTTTCTTTCAAACCTTTCCATCTGAAGTTGATTCTATAGGTGCAGTTGCAGTTCTAGCTCTTTCTTTAGTTGCTGGAGATGTAATACGACTAGCATCAAGCCTTCCTTCTTCAGTAATAGTTCCAGTGGAGGAAGAAGAAGAGCAGATCGCTTTAGACTGCCTCCCTTACTAAACAAGATAGGCTCGCTTCATCTGAGCCGTCGCCCCTTTCAATAGGTGTAGGCATCGGGCCGATTCTCCTTTGCCTATCTTCCTGCTCTGCCAGTATACCTCCTTGCAAACCTCCCTTCCCTTAGCTTTCAATCTGTCTTGTGCCACTCCAGCTTTCACTCAAGCCATTCTTTGAACATACTTTATAGGGGCGACCTTCACTCTTCTTCTCGCTTCCTAACCCTAAAAGCTCACTTCTTTTGGTGTTGCTCCACGATCTTAAAGTGGAACTACGAGATAAATAAGCGGCGGGCTGATCTGACCTGCGCGTCTGCCTTCCTTTCGTCACTACGACTTGGTTTCGAAAGAAGGAATGAGCGCTAGCCTAGCTAACTAGCATACCTTTCCTTGCCTCTTGCTCCGTAAAATGCTATCACATTTTGATTCCAATCATCTCATCTTTGTCCCGTTGAGAAGTTTAGTGGATGAACACTAGAATTGAGTTGCATGAAATACCTGGCAATTCTTGAGATAGGGCTCATCAGACTTTCTTAGTGAGAGTCCCAGTGGTACAGACTATGTCAAAGCTGATCTTTGAAGTACGATCGGAGGAGATACCCGGCAGTGAAAGCTTTCCTCTCCTTTTAGTCGAGTTACGTCAGTACCTCTCGCAATAAATGCTCGAGTTCCCTCTTTTAAAAGAGTAATAAATTACCTTGGACCCTATCCTCTCTGATAGATGATCTTGCTTGGGCCACTGAAGAAGAAGAATATTGAGGAATTGGACTTAGCATTCTATCTAATGCTTTGATCCATCTAAGCCCATTGACAAGCAGGAAGAGGAGAGGGGGCTTTTGGGATAATTATGATACTGAGCCCAATGGAAAAGCCCACGCCCGAGTCCAAAATGGAATTACTGGGGAAACGAATCCAAGAAAGCCCAAAAACAAAAGTGTGGAGAAGGGGACTTATTGTACTGAAAAAGTTATTGTGCTCATTTACTCTATACGCGTCTTAGTGGACTGACAGAGTGAGCTGGAAAGGTTCCGTCTTTCCGGGGAAATTCAAGAGAGCTAGCTTCGGTGCTCACCAAAGGACGGAGCTGTCGAGTAAGGATTGGCCGAAGTCAGTTACCTGGGAATCAGCCAATAAAAAATAGACAAATAAAAGCGTGATCTGAGTAGGCAGAGCTAAATAGTGCACGTAGGGTAAACGAGGACTCTGGTCAGCTTTGAGCTGTCGAGTAAGGAGTGACGGGCCTTTGGAAACCCGAGAAAAGCGGGGGAGTACTCTATACAGTGCGTTCTATTATTGCCTCTTATTCCCGAGGGAGTGGTCGTAATTAAGCCGCGTGGCAATACCCGCCAAAAAGGACTCTTTGATTTTGAGGGGCGGGGCCTTTATCCAGGGGAGAATTCTTCAGCGCACTAAAATCTAGTTAAGGGGGTTCCATATTCATGAAAAGCCGGGGTTGAACCATGTTACGGAACTAAGACAAGAATTATGACTAATAAGAAAGGGTTTAGGGCCTGCCTATAAATAGAAGCTTCTTTCAGTCTCTATTTGGCAAAGAGGGCACTTAGAAGTCGGCAAGAAAGTGAGTAGACATGGAT.ACTTGAACAGACTGGCGAGCATTCAACAAGAAATACAAACCGTGGAAAACGAAAAGCTCCAATGTGAGCAAATGCTTGGTCTGTTCTGGGAGCATCCGCCTGCTCTCGATCCGGAGGTCGTGGGCAGAAGGATGCAACTTTTACGGGACCGCATTCGCGGTCTGAAACACAGGATTTCTTTTCTCCTGAAGGAGCAGGAAGGCCTAATAATACAGGCTGTCACCCACGGTCGCCGGGGAGACTAGAATAGAAGAGTCCGTCGACTCTTTCTTTCGATAAGATTGAAATAAGGAGTCCGTCGACCCAAAGTAATGTGTTTTAATGCATGGCTTTCTTTGTTATCTTTCATGTTGCTCTATGTCTTTGGTTTATGTACTATGTTCTTAGTTTCCTTTTTAATGGTGTGTGGCTGGTCTACGGTGTGTGTAGGCTTCCTATTTTATGTATGCTTGTAATGCTTCTGCTTTGTCAAATATTCCTTTGAATATCCGGTCTTCATCTTCCTTAGATTAGATGCTACTTCCTTCGTCTAACGCACTGCCCCACAGATAATCAAAGTCTGTAATAGCGGACGATTCTATCAAACCCTAAAGTAGAAGAAAAAGTAGAAGCTACGAAACCATAAAGCTTCCCTCCTGTTTGAAACAGAAAGCATTGATATCATTGGACACTAAAGGGTCAAACTTTGCTTTGTGCTGTTCACATAGTCGACTGGGAAACGGAAAATCTCATTAATCTTAGTATTACAGACTTTTTACGAAGCGAGAGGAAAAGACGGCAAAGTCTTAACTAAACTATTCCGACTGAATATGAGCCTAAAAAAAATGCGAACTTCCTTCAATGCCTTCTCATTAGTATCTGCTGTGTCGCTAAGCATTCTTTCCATCCGCTAATGGACCTATGCTCGACGGAATCGGCGTGCAGGAGCGTACTGCAGAACTATGACCCATACAGTGGAAGCTCTGGTCCC......................................................................................................................................................................................................................................................................................................................................................................................................................................................................................................................................................................................................................................................................................................................................................................................................................................................................................................................................................................................................................................................................................................................................................................................................................................................................................................................................................................................................................................................................................................................................................................................................................................................................................................................................................................................................................................................................................................................................................................................................................................................................................................................................................................................................................................................................................................................................................................................................................................................................................................................................................................................................................................................................................................................................................................................................................................................................................................................................................................................................................................................................................................................................................................................................................................................................................................................

>B._nigra_LR1-2

...............................................................................................................................................................................................................................................................................................................................................................................................................................................................................................................................................................................................................................................................................................................................................................................................................................................................................................................................................................................................................................................................................................................................................................................AGAAGAAGGATGGAGCAGAAAGATAGAAAGATCAGTTGCTGGAAATCAAATATGTAAATAGTCGAGTTATTGCATTCCTCTCACAAACTATCAATTTCATAAGAGAAGAAAGATCGTTTTTAGAAAAGAAAGAAGGTTTTGATTCGAGGAGGCTGATCGTTTTTAGAAAAGAAAGAAGGTTTTGATTCGAGGCGGATCCCTTTTTTCTTTGCCTTTACGAGTAAGAAAGTGGTTACGCTCCGCTGGGGAGCCGGAACTGTAAATTCCTACTGTGGTTCGAGTCCACAAACCACTGAGAGCTCTGGCATCGGTTCAGGCTAAATCCTGAAGAAAGCTAGAAAGCGCTGTTTGATGAGCCTGCGTCCGATTTGTGAGTTGGTTAGGTAAAGGCTGACCAAGCCAATGATGCTTAGCTGCCCAGTCGTGCCGAGGAATTCCCATCCGACCAGAGGAGGGAAGAGAGTGACTAAGCAGCAGCTCCACTTGTCGCGTACTTCTTTAGCTGCACCGTCATCGCCGGCCGGACAAACCCTTCCAACAAATGGGGAGTGGGCCAAAGGAACACGACACATCCAGTGAAGAGATCCCGGACAGGGAAGTCAGAAGGTCTGCAAGCCTCGTCTTCGCCCCTGCTTTAGCTGCACTTGGTGCGTAAGAGGGAGACCCGGTCGCTCAGATACAGACAGCAGCTCATTTTACGCTTAAACACATCCCAGGGAATTACAGGAATACGGGCTCCGCCTAGCTACCTGATCCCATCATGAATAGGAATTACCAGCGAACCAAGAGAGATAGATTCAACAGAGGAGAAGGGGTGGCGTGCTTTAGCGACACCTTCAAGACATCCAGGAGTGATCTAGACGAGGTGGGACATGCCGGCTAGAGTACATGCTTCAACTGGAACATCGCTTCGCTACTCTTCCCTCCCTACCCCTACGGTCGTACACTCTGTTGATAGTTCGCCAATGGCTCACAACCAGACAATCATAGTATGTTCGTTCGTTCACTTCGTTCTCTCTCTCCCCTTCTCCCGTTAGCTTGTTCCCCTCCTCCCTTCCCAACCTTCCCAGCCCTTCCTCCAAGAGTAGTTACGCCTTTTCCGTCAGTGGAGAGAGCGAGCAACGACCTGTGAGCGACCGTAGCTCCCTCTGCAAGTGGTAAGGCGCAGTTCACCCCCTATCGAACGGAGGAAGATCGCTGTTGATGTCATGACTAACTTCTTGATTCTTTGATGAGAGAGGCGTGCGTGTGAAATGTCTGATTCATGGCTTGGTTAACGAGATGTCCCAACTGGTACTGGAGCACACCCGTCTGGTTCGTACCATCATTGGCTTGTTCATCCTTTACCTAAGCCTAATCTTCTTCTTCATAGCACACGGAAGTAAAAAAAAGCAGAGAAGGATTAAGACTAACCACTTTTTCGACATCCCTTCATGAAGCGCAGCAACATTTCGGAAGACTGCTAAAAGCGAGAAGTCCTGACCTTCGTTACTAGAGCACAGAAAAAGCAACAGTGTGCTGTACAGAGAACTTGCTTCGATAGGAAAAGAAAAGCTGTATTTCTAAGCTGGGAATGTTGGGTAAGAGTCCGCCTATTACCTCTAAAAAGTGGAGGAGGTGAGACCCCTGTTGGAGTCAACTTTTGAATTTACCGGCTTTGGAGAAACCTTTTCAGTTGCTTAGTGCGAATCCCACGTTTCGAGGGTGGGTAAGGTCTCAGTACCTCGGATATAGCACAGAAAGGCCTATAGCATCCAATACC.ACTTTTCAGGT.TACTTCCTTGTGAGCTTGTCAGACAAAGTAGGCGACGGTGTGCTGCACTACATCTCCTCAGCAGTTGATCGGTCAGGTTCCTTGCCTTGCTTAACCCAGCTCGAGTATTATTCGAAACGAGGAATATCCTTACTCTAGAAGCTCAGAGTTAAGAGTTAAGGGAAGGTGTTAGCTAAGGAATTAGGTCTTCCTCTTCGAAAGGAGAACTCTAGTCTACCGTGGTGGGTAGTAGCTACTCCCAGTACATCTATCATCCGTGACATCCATGGCAACTACTACTTTTCATTGCTGTGCTGTTTAATCGATCGAACAAAACTCCTAAGGTAGAGATCTTAAGAAGAGGACGAGCTCAACTCCCGATTGTTCAAGCTTAGATACCTCTTTGATTTGGGATTGACGAAACAGTATAAACCTTTATAATAGGCCTATTTTGTGCGTTTAATCACCTTTCTTTCATCTCTGAGCCAGCTATCCTTTCAGAATAGGGCTTTCCGCTTTCTTTTAAGGTGAGGAATCTTAGGAGTTCAGCTTTTTCGATTAAACGAAGAATTCTGTCATTTCAGATGGGATTCCAAAGCAAGGCTAGTTATCTATGTTAGCTTCATTCCTGTGAAGTTGGTTTCTAGTTTTTATCTTTGAGTTGGCAGTAACATGACTAGCAGCATAGTACGCACACACGAAAGTCAAGGGATTGTCTGGCCCTGCTACCTACCCAACATGAGCACACTCCGAAATTAGAGTAGCTATCTATTTCATAAGAGACCTCTTGCAGATTGAAGCATGATTGGGCTCTCCGCTTCTCTTCAGATGGAACTTCGCCATGTCCATGTCCCTCGAGTACTGTTCCTAGAGTATAGTAGAGTACGGATCGATTGAACTGGTTTCTGTCGTACCCCTAACGGTACAGTTATGACCTAATGCGGGGTCTCTCTCAGGCAGAAGATCAACCGATGTACGATGTTGGACCTAATGAGAGGTCCTTCTCTGTCAGGGTTTATAGGTCAACTGGTTGCTTCGCTAGAGTAGGACCTAACCCATGTACTGTGAGTGTTGATTAGTCACCCTGATATCGAGTGAGCATTCGGGGGTGTAGACTTCACACTTTAACAGGTCATCTGTCTTTCGAAGTTTTCTGTAACACAGAGATGTAGTTGCAAGGCAAAGGTCAACTAGCTTGCTTCGCTAGGTTGCTTCGCTAGGGACTTAAGGAGAAGTTATTTTCTGTAGCACAGAGATGACTTTAGTAAGTTGCAAGGCGAAGGCCTCAACGATTGTGGTTAATCTATCTTGGTATCTTTGTGATGAGGTATGGCTTATCTGTGCTGGGGTGTGCTTGGGAGTCAAATGCTAGGGTCATGCGAAAAGTCCTATTTCCAATTCCGATCTCATATCTAAGGAACGGGAGTTCTTAACAGAAGAAAGGCCATAGACTCCGTTTGGTACGTATCTGATATGTGACAAATCCTAAATCTGCAAGGTATCTTATCTCTCTCAGTTATTAATATGGTGCTGGACTAGCGAAGCAACCCTTTTGAAGAAGGAATCTTAGGAGTTCTGCAGCATATGGATGGCTTAAAGGAAGAAATCAGACATCTGAGATAAGCAGGGCTGTTGTCTAATCTGAGGAATGCATACGAATCCTATAGTAAGTTCACGGGTAATTCTCCGCTTAGTTCAGTAATCTCCTGAAAGTTGGGTGAGCTATTCTGTTTTCCGAGGTACCAACACTTTCAACCACTTTATTTCCGAGGTCCTAAACCTTAAACCAGTTTTTAAACGCGATTAAACGCAGATCAGCGACATCCGTTTTCCAAGGACTAGCGAAGCAACCGTAAATCTGATACTTTGCTATAGTTTGCTACTTTTTCTGGGTATCGAGGAAGTATTCGAAGTCTGCCTTGGTTCAGCACACTATTCCGCGCATCTCCCACTCGCTTACTGGCAGAAGGTCTGCAAGCCTAGCCCCTTCTCTTTATCGAGGGCAACTCATGCTTATAGGGCACTCCCGGGATGGAACCAGCGATAATTACTTCCACTCAAAGGGATCGGATTATGAACCACTCCTAGCTGCTTTCTTTCAAACCTTTCCATCTGAAGTTGATTCTATAGGTGCAGTTGCAGTTCTAGCTCTTTCTTTAGTTGCTGGAGATGTAATACGACTAGCATCAAGCCTTCCTTCTTCAGTAATAGTTCCAGTGGAGGAAGAAGAAGAGCAGATCGCTTTAGACTGCCTCCCTTACTAAACAAGATAGGCTCGCTTCATCTGAGCCGTCGCCCCTTTCAATAGGTGTAGGCATCGGGCCGATTCTCCTTTGCCTATCTTCCTGCTCTGCCAGTATACCTCCTTGCAAACCTCCCTTCCCTTAGCTTTCAATCTGTCTTGTGCCACTCCAGCTTTCACTCAAGCCATTCTTTGAACATACTTTATAGGGGCGACCTTCACTCTTCTTCTCGCTTCCTAACCCTAAAAGCTCACTTCTTTTGGTGTTGCTCCACGATCTTAAAGTGGAACTACGAGATAAATAAGCGGCGGGCTGATCTGACCTGCGCGTCTGCCTTCCTTTCGTCACTACGACTTGGTTTCGAAAGAAGGAATGAGCGCTAGCCTAGCTAACTAGCATACCTTTCCTTGCCTCTTGCTCCGTAAAATGCTATCACATTTTGATTCCAATCATCTCATCTTTGTCCCGTTGAGAAGTTTAGTGGATGAACACTAGAATTGAGTTGCATGAAATACCTGGCAATTCTTGAGATAGGGCTCATCAGACTTTCTTAGTGAGAGTCCCAGTGGTACAGACTATGTCAAAGCTGATCTTTGAAGTACGATCGGAGGAGATACCCGGCAGTGAAAGCTTTCCTCTCCTTTTAGTCGAGTTACGTCAGTACCTCTCGCAATAAATGCTCGAGTTCCCTCTTTTAAAAGAGTAATAAATTACCTTGGACCCTATCCTCTCTGATAGATGATCTTGCTTGGGCCACTGAAGAAGAAGAATATTGAGGAATTGGACTTAGCATTCTATCTAATGCTTTGATCCATCTAAGCCCATTGACAAGCAGGAAGAGGAGAGGGGGCTTTTGGGATAATTATGATACTGAGCCCAATGGAAAAGCCCACGCCCGAGTCCAAAATGGAATTACTGGGGAAACGAATCCAAGAAAGCCCAAAAACAAAAGTGTGGAGAAGGGGACTTATTGTACTGAAAAAGTTATTGTGCTCATTTACTCTATACGCGTCTTAGTGGACTGACAGAGTGAGCTGGAAAGGTTCCGTCTTTCCGGGGAAATTCAAGAGAGCTAGCTTCGGTGCTCACCAAAGGACGGAGCTGTCGAGTAAGGATTGGCCGAAGTCAGTTACCTGGGAATCAGCCAATAAAAAATAGACAAATAAAAGCGTGATCTGAGTAGGCAGAGCTAAATAGTGCACGTAGGGTAAACGAGGACTCTGGTCAGCTTTGAGCTGTCGAGTAAGGAGTGACGGGCCTTTGGAAACCCGAGAAAAGCGGGGGAGTACTCTATACAGTGCGTTCTATTATTGCCTCTTATTCCCGAGGGAGTGGTCGTAATTAAGCCGCGTGGCAATACCCGCCAAAAAGGACTCTTTGATTTTGAGGGGCGGGGCCTTTATCCAGGGGAGAATTCTTCAGCGCACTAAAATCTAGTTAAGGGGGTTCCATATTCATGAAAAGCCGGGGTTGAACCATGTTACGGAACTAAGACAAGAATTATGACTAATAAGAAAGGGTTTAGGGCCTGCCTATAAATAGAAGCTTCTTTCAGTCTCTATTTGGCAAAGAGGGCACTTAGAAGTCGGCAAGAAAGTGAGTAGACATGGATATCGCGAACAGACTGGCGAGCATTCAACAAGAAATACAAACCGTGGAAAACGAAAAGCTCCAATGTGAGCAAATGCTTGGTCTGTTCTGGGAGCATCCGCCTGCTCTCGATCCGGAGGTCGTGGGCAGAAGGATGCAACTTTTACGGGACCGCATTCGCGGTCTGAAACACAGGATTTCTTTTCTCCTGAAGGAGCAGGAAGGCCTAATAATACAGGCTGTCACCCACGGTCGCCGGGGAGACTAGAATAGAAGAGTCCGTCGACTCTTTCTTTCGATAAGATTGAAATAAGGAGTCCGTCGACCCAAAGTAATGTGTTTTAATGCATGGCTTTCTTTGTTATCTTTCATGTTGCTCTATGTCTTTGGTTTATGTACTATGTTCTTAGTTTCCTTTTTAATGGTGTGTGGCTGGTCTACGGTGTGTGTAGGCTTCCTATTTTATGTATGCTTGTAATGCTTCTGCTTTGTCAAATATTCCTTTGAATATCCGGTCTTCATCTTCCTTAGATTAGATGCTACTTCCTTCGTCTAACGCACTGCCCCACAGATAATCAAAGTCTGTAATAGCGGACGATTCTATCAAACCCTAAAGTAGAAGAAAAAGTAGAAGCTACGAAACCATAAAGCTTCCCTCCTGTTTGAAACAGAAAGCATTGATATCATTGGACACTAAAGGGTCAAACTTTGCTTTGTGCTGTTCACATAGTCGACTGGGAAACGGAAAATCTCATTAATCTTAGTATTACAGACTTTTTACGAAGCGAGAGGAAAAGACGGCAAAGTCTTAACTAAACTATTCCGACTGAATATGAGCCTAAAAAAAATGCGAACTTCCTTCAATGCCTTCTCATTAGTATCTGCTGTGTCGCTAAGCATTCTTTCCATCCGCTAATGGACCTATGCTCGACGGAATCGGCGTGCAGGAGCGTACTGCAGAACTATGACCCATACAGTGGAAGCTCTGGTCCC......................................................................................................................................................................................................................................................................................................................................................................................................................................................................................................................................................................................................................................................................................................................................................................................................................................................................................................................................................................................................................................................................................................................................................................................................................................................................................................................................................................................................................................................................................................................................................................................................................................................................................................................................................................................................................................................................................................................................................................................................................................................................................................................................................................................................................................................................................................................................................................................................................................................................................................................................................................................................................................................................................................................................................................................................................................................................................................................................................................................................................................................................................................................................................................................................................................................................................................................

>B._carinata_LR1-2

...............................................................................................................................................................................................................................................................................................................................................................................................................................................................................................................................................................................................................................................................................................................................................................................................................................................................................................................................................................................................................................................................................................................................................................................AGAAGAAGGATGGAGCAGAAAGATAGAAAGATCAGTTGCTGGAAATCAAATATGTAAATAGTCGAGTTATTGCATTCCTCTCACAAACTATCAATTTCATAAGAGAAGAAAGATCGTTTTTCGAAACTATCAA....TTTCATAAGAGAAGAAAGATCGTTTTTAGAAAAGAAAGAAGGTTTTGATTCGAGGCGGATCCCTTTTTTCTTTGCCTTTACGAGTAAGAAAGTGGTTACGCTCCGCTGGGGAGCCGGAACTGTAAATTCCTACTGTGGTTCGAGTCCACAAACCACTGAGAGCTCTGGCATCGGTTCAGGCTAAATCCTGAAGAAAGCTAGAAAGCGCTGTTTGATGAGCCTGCGTCCGATTTGTGAGTTGGTTAGGTAAAGGCTGACCAAGCCAATGATGCTTAGCTGCCCAGTCGTGCCGAGGAATTCCCATCCGACCAGAGGAGGGAAGAGAGTGACTAAGCAGCAGCTCCACTTGTCGCGTACTTCTTTAGCTGCACCGTCATCGCCGGCCGGACAAACCCTTCCAACAAATGGGGAGTGGGCCAAAGGAACACGACACATCCAGTGAAGAGATCCCGGACAGGGAAGTCAGAAGGTCTGCAAGCCTCGTCTTCGCCCCTGCTTTAGCTGCACTTGGTGCGTAAGAGGGAGACCCGGTCGCTCAGATACAGACAGCAGCTCATTTTACGCTTAAACACATCCCAGGGAATTACAGGAATACGGGCTCCGCCTAGCTACCTGATCCCATCATGAATAGGAATTACCAGCGAACCAAGAGAGATAGATTCAACAGAGGAGAAGGGGTGGCGTGCTTTAGCGACACCTTCAAGACATCCAGGAGTGATCTAGACGAGGTGGGACATGCCGGCTAGAGTACATGCTTCAACTGGAACATCGCTTCGCTACTCTTCCCTCCCTACCCCTACGGTCGTACACTCTGTTGATAGTTCGCCAATGGCTCACAACCAGACAATCATAGTATGTTCGTTCGTTCACTTCGTTCTCTCTCTCCCCTTCTCCCGTTAGCTTGTTCCCCTCCTCCCTTCCCAACCTTCCCAGCCCTTCCTCCAAGAGTAGTTACGCCTTTTCCGTCAGTGGAGAGAGCGAGCAACGACCTGTGAGCGACCGTAGCTCCCTCTGCAAGTGGTAAGGCGCAGTTCACCCCCTATCGAACGGAGGAAGATCGCTGTTGATGTCATGACTAACTTCTTGATTCTTTGATGAGAGAGGCGTGCGTGTGAAATGTCTGATTCATGGCTTGGTTAACGAGATGTCCCAACTGGTACTGGAGCACACCCGTCTGGTTCGTACCATCATTGGCTTGTTCATCCTTTACCTAAGCCTAATCTTCTTCTTCATAGCACACGGAAGTAAAAAAAAGCAGAGAAGGATTAAGACTAACCACTTTTTCGACATCCCTTCATGAAGCGCAGCAACATTTCGGAAGACTGCTAAAAGCGAGAAGTCCTGACCTTCGTTACTAGAGCACAGAAAAAGCAACAGTGTGCTGTACAGAGAACTTGCTTCGATAGGAAAAGAAAAGCTGTATTTCTAAGCTGGGAATGTTGGGTAAGAGTCCGCCTATTACCTCTAAAAAGTGGAGGAGGTGAGACCCCTGTTGGAGTCAACTTTTGAATTTACCGGCTTTGGAGAAACCTTTTCAGTTGCTTAGTGCGAATCCCACGTTTCGAGGGTGGGTAAGGTCTCAGTACCTCGGATATAGCACAGAAAGGCCTATAGCATCCAATACC.ACTTTTCAGGT.TACTTCCTTGTGAGCTTGTCAGACAAAGTAGGCGACGGTGTGCTGCACTACATCTCCTCAGCAGTTGATCGGTCAGGTTCCTTGCCTTGCTTAACCCAGCTCGAGTATTATTCGAAACGAGGAATATCCTTACTCTAGAAGCTCAGAGTTAAGAGTTAAGGGAAGGTGTTAGCTAAGGAATTAGGTCTTCCTCTTCGAAAGGAGAACTCTAGTCTACCGTGGTGGGTAGTAGCTACTCCCAGTACATCTATCATCCGTGACATCCATGGCAACTACTACTTTTCATTGCTGTGCTGTTTAATCGATCGAACAAAACTCCTAAGGTAGAGATCTTAAGAAGAGGACGAGCTCAACTCCCGATTGTTCAAGCTTAGATACCTCTTTGATTTGGGATTGACGAAACAGTATAAACCTTTATAATAGGCCTATTTTGTGCGTTTAATCACCTTTCTTTCATCTCTGAGCCAGCTATCCTTTCAGAATAGGGCTTTCCGCTTTCTTTTAAGGTGAGGAATCTTAGGAGTTCAGCTTTTTCGATTAAACGAAGAATTCTGTCATTTCAGATGGGATTCCAAAGCAAGGCTAGTTATCTATGTTAGCTTCATTCCTGTGAAGTTGGTTTCTAGTTTTTATCTTTGAGTTGGCAGTAACATGACTAGCAGCATAGTACGCACACACGAAAGTCAAGGGATTGTCTGGCCCTGCTACCTACCCAACATGAGCACACTCCGAAATTAGAGTAGCTATCTATTTCATAAGAGACCTCTTGCAGATTGAAGCATGATTGGGCTCTCCGCTTCTCTTCAGATGGAACTTCGCCATGTCCATGTCCCTCGAGTACTGTTCCTAGAGTATAGTAGAGTACGGATCGATTGAACTGGTTTCTGTCGTACCCCTAACGGTACAGTTATGACCTAATGCGGGGTCTCTCTCAGGCAGAAGATCAACCGATGTACGATGTTGGACCTAATGAGAGGTCCTTCTCTGTCAGGGTTTATAGGTCAACTGGTTGCTTCGCTAGAGTAGGACCTAACCCATGTACTGTGAGTGTTGATTAGTCACCCTGATATCGAGTGAGCATTCGGGGGTGTAGACTTCACACTTTAACAGGTCATCTGTCTTTCGAAGTTTTCTGTAACACAGAGATGTAGTTGCAAGGCAAAGGTCAACTAGCTTGCTTCGCTAGGTTGCTTCGCTAGGGACTTAAGGAGAAGTTATTTTCTGTAGCACAGAGATGACTTTAGTAAGTTGCAAGGCGAAGGCCTCAACGATTGTGGTTAATCTATCTTGGTATCTTTGTGATGAGGTATGGCTTATCTGTGCTGGGGTGTGCTTGGGAGTCAAATGCTAGGGTCATGCGAAAAGTCCTATTTCCAATTCCGATCTCATATCTAAGGAACGGGAGTTCTTAACAGAAGAAAGGCCATAGACTCCGTTTGGTACGTATCTGATATGTGACAAATCCTAAATCTGCAAGGTATCTTATCTCTCTCAGTTATTAATATGGTGCTGGACTAGCGAAGCAACCCTTTTGAAGAAGGAATCTTAGGAGTTCTGCAGCATATGGATGGCTTAAAGGAAGAAATCAGACATCTGAGATAAGCAGGGCTGTTGTCTAATCTGAGGAATGCATACGAATCCTATAGTAAGTTCACGGGTAATTCTCCGCTTAGTTCAGTAATCTCCTGAAAGTTGGGTGAGCTATTCTGTTTTCCGAGGTACCAACACTTTCAACCACTTTATTTCCGAGGTCCTAAACCTTAAACCAGTTTTTAAACGCGATTAAACGCAGATCAGCGACATCCGTTTTCCAAGGACTAGCGAAGCAACCGTAAATCTGATACTTTGCTATAGTTTGCTACTTTTTCTGGGTATCGAGGAAGTATTCGAAGTCTGCCTTGGTTCAGCACACTATTCCGCGCATCTCCCACTCGCTTACTGGCAGAAGGTCTGCAAGCCTAGCCCCTTCTCTTTATCGAGGGCAACTCATGCTTATAGGGCACTCCCGGGATGGAACCAGCGATAATTACTTCCACTCAAAGGGATCGGATTATGAACCACTCCTAGCTGCTTTCTTTCAAACCTTTCCATCTGAAGTTGATTCTATAGGTGCAGTTGCAGTTCTAGCTCTTTCTTTAGTTGCTGGAGATGTAATACGACTAGCATCAAGCCTTCCTTCTTCAGTAATAGTTCCAGTGGAGGAAGAAGAAGAGCAGATCGCTTTAGACTGCCTCCCTTACTAAACAAGATAGGCTCGCTTCATCTGAGCCGTCGCCCCTTTCAATAGGTGTAGGCATCGGGCCGATTCTCCTTTGCCTATCTTCCTGCTCTGCCAGTATACCTCCTTGCAAACCTCCCTTCCCTTAGCTTTCAATCTGTCTTGTGCCACTCCAGCTTTCACTCAAGCCATTCTTTGAACATACTTTATAGGGGCGACCTTCACTCTTCTTCTCGCTTCCTAACCCTAAAAGCTCACTTCTTTTGGTGTTGCTCCACGATCTTAAAGTGGAACTACGAGATAAATAAGCGGCGGGCTGATCTGACCTGCGCGTCTGCCTTCCTTTCGTCACTACGACTTGGTTTCGAAAGAAGGAATGAGCGCTAGCCTAGCTAACTAGCATACCTTTCCTTGCCTCTTGCTCCGTAAAATGCTATCACATTTTGATTCCAATCATCTCATCTTTGTCCCGTTGAGAAGTTTAGTGGATGAACACTAGAATTGAGTTGCATGAAATACCTGGCAATTCTTGAGATAGGGCTCATCAGACTTTCTTAGTGAGAGTCCCAGTGGTACAGACTATGTCAAAGCTGATCTTTGAAGTACGATCGGAGGAGATACCCGGCAGTGAAAGCTTTCCTCTCCTTTTAGTCGAGTTACGTCAGTACCTCTCGCAATAAATGCTCGAGTTCCCTCTTTTAAAAGAGTAATAAATTACCTTGGACCCTATCCTCTCTGATAGATGATCTTGCTTGGGCCACTGAAGAAGAAGAATATTGAGGAATTGGACTTAGCATTCTATCTAATGCTTTGATCCATCTAAGCCCATTGACAAGCAGGAAGAGGAGAGGGGGCTTTTGGGATAATTATGATACTGAGCCCAATGGAAAAGCCCACGCCCGAGTCCAAAATGGAATTACTGGGGAAACGAATCCAAGAAAGCCCAAAAACAAAAGTGTGGAGAAGGGGACTTATTGTACTGAAAAAGTTATTGTGCTCATTTACTCTATACGCGTCTTAGTGGACTGACAGAGTGAGCTGGAAAGGTTCCGTCTTTCCGGGGAAATTCAAGAGAGCTAGCTTCGGTGCTCACCAAAGGACGGAGCTGTCGAGTAAGGATTGGCCGAAGTCAGTTACCTGGGAATCAGCCAATAAAAAATAGACAAATAAAAGCGTGATCTGAGTAGGCAGAGCTAAATAGTGCACGTAGGGTAAACGAGGACTCTGGTCAGCTTTGAGCTGTCGAGTAAGGAGTGACGGGCCTTTGGAAACCCGAGAAAAGCGGGGGAGTACTCTATACAGTGCGTTCTATTATTGCCTCTTATTCCCGAGGGAGTGGTCGTAATTAAGCCGCGTGGCAATACCCGCCAAAAAGGACTCTTTGATTTTGAGGGGCGGGGCCTTTATCCAGGGGAGAATTCTTCAGCGCACTAAAATCTAGTTAAGGGGGTTCCATATTCATGAAAAGCCGGGGTTGAACCATGTTACGGAACTAAGACAAGAATTATGACTAATAAGAAAGGGTTTAGGGCCTGCCTATAAATAGAAGCTTCTTTCAGTCTCTATTTGGCAAAGAGGGCACTTAGAAGTCGGCAAGAAAGTGAGTAGACATGGATATCGCGAACAGACTGGCGAGCATTCAACAAGAAATACAAACCGTGGAAAACGAAAAGCTCCAATGTGAGCAAATGCTTGGTCTGTTCTGGGAGCATCCGCCTGCTCTCGATCCGGAGGTCGTGGGCAGAAGGATGCAACTTTTACGGGACCGCATTCGCGGTCTGAAACACAGGATTTCTTTTCTCCTGAAGGAGCAGGAAGGCCTAATAATACAGGCTGTCACCCACGGTCGCCGGGGAGACTAGAATAGAAGAGTCCGTCGACTCTTTCTTTCGATAAGATTGAAATAAGGAGTCCGTCGACCCAAAGTAATGTGTTTTAATGCATGGCTTTCTTTGTTATCTTTCATGTTGCTCTATGTCTTTGGTTTATGTACTATGTTCTTAGTTTCCTTTTTAATGGTGTGTGGCTGGTCTACGGTGTGTGTAGGCTTCCTATTTTATGTATGCTTGTAATGCTTCTGCTTTGTCAAATATTCCTTTGAATATCCGGTCTTCATCTTCCTTAGATTAGATGCTACTTCCTTCGTCTAACGCACTGCCCCACAGATAATCAAAGTCTGTAATAGCGGACGATTCTATCAAACCCTAAAGTAGAAGAAAAAGTAGAAGCTACGAAACCATAAAGCTTCCCTCCTGTTTGAAACAGAAAGCATTGATATCATTGGACACTAAAGGGTCAAACTTTGCTTTGTGCTGTTCACATAGTCGACTGGGAAACGGAAAATCTCATTAATCTTAGTATTACAGACTTTTTACGAAGCGAGAGGAAAAGACGGCAAAGTCTTAACTAAACTATTCCGACTGAATATGAGCCTAAAAAAAATGCGAACTTCCTTCAATGCCTTCTCATTAGTATCTGCTGTGTCGCTAAGCATTCTTTCCATCCGCTAATGGACCTATGCTCGACGGAATCGGCGTGCAGGAGCGTACTGCAGAACTATGACCCATACAGTGGAAGCTCTGGTCCCACTAAT................................................................................................................................................................................................................................................................................................................................................................................................................................................................................................................................................................................................................................................................................................................................................................................................................................................................................................................................................................................................................................................................................................................................................................................................................................................................................................................................................................................................................................................................................................................................................................................................................................................................................................................................................................................................................................................................................................................................................................................................................................................................................................................................................................................................................................................................................................................................................................................................................................................................................................................................................................................................................................................................................................................................................................................................................................................................................................................................................................................................................................................................................................................................................................................................................................................................................................................

>B._carinata_LR1-1
[truncated: 175,794 more chars]
